# Supplementary material
Source: publisher figshare collection journal article supplement (https://acs.figshare.com/ndownloader/files/5885955)
Supplement: Supplementary file 1 [file 5885955]

 
data_I
 
_audit_creation_method            SHELXL-2014/6
_chemical_name_systematic         ?
_chemical_name_common             ?
_chemical_melting_point           ?
_chemical_formula_moiety          ?
_chemical_formula_sum             'C29.64 H34.56 O10.36' 
_chemical_formula_weight          556.72

loop_
 _atom_type_symbol
 _atom_type_description
 _atom_type_scat_dispersion_real
 _atom_type_scat_dispersion_imag
 _atom_type_scat_source
 'C'  'C'   0.0181   0.0091
 'International Tables Vol C Tables 4.2.6.8 and 6.1.1.4'
 'H'  'H'   0.0000   0.0000
 'International Tables Vol C Tables 4.2.6.8 and 6.1.1.4'
 'O'  'O'   0.0492   0.0322
 'International Tables Vol C Tables 4.2.6.8 and 6.1.1.4'
 
_space_group_crystal_system       orthorhombic
_space_group_IT_number            19
_space_group_name_H-M_alt         'P 21 21 21'
_space_group_name_Hall            'P 2ac 2ab'
 
_shelx_space_group_comment
;
The symmetry employed for this shelxl refinement is uniquely defined
by the following loop, which should always be used as a source of
symmetry information in preference to the above space-group names.
They are only intended as comments.
;
 
loop_
 _space_group_symop_operation_xyz
 'x, y, z'
 '-x+1/2, -y, z+1/2'
 '-x, y+1/2, -z+1/2'
 'x+1/2, -y+1/2, -z'
 
_cell_length_a                    6.9086(4)
_cell_length_b                    13.0711(8)
_cell_length_c                    29.2663(18)
_cell_angle_alpha                 90
_cell_angle_beta                  90
_cell_angle_gamma                 90
_cell_volume                      2642.8(3)
_cell_formula_units_Z             4
_cell_measurement_temperature     150(2)
_cell_measurement_reflns_used     9072
_cell_measurement_theta_min       3.02
_cell_measurement_theta_max       65.04
 
_exptl_crystal_description        prism
_exptl_crystal_colour             colorless
_exptl_crystal_density_meas       ?
_exptl_crystal_density_method     'not measured'
_exptl_crystal_density_diffrn     1.399          
_exptl_crystal_F_000              1181
_exptl_transmission_factor_min    ?
_exptl_transmission_factor_max    ?
_exptl_crystal_size_max           0.190
_exptl_crystal_size_mid           0.160
_exptl_crystal_size_min           0.130
_exptl_absorpt_coefficient_mu     0.884
_shelx_estimated_absorpt_T_min    0.850
_shelx_estimated_absorpt_T_max    0.894
_exptl_absorpt_correction_type    multi-scan
_exptl_absorpt_correction_T_min   0.5463
_exptl_absorpt_correction_T_max   0.7526
_exptl_absorpt_process_details    'SADABS-2012/1 (Bruker,2012)'
_exptl_absorpt_special_details    ?
_diffrn_ambient_temperature       150(2)
_diffrn_radiation_wavelength      1.54178
_diffrn_radiation_type            CuK\a
_diffrn_source                    'fine-focus sealed tube'
_diffrn_measurement_device_type   'Bruker Kappa APEX-Duo CCD'
_diffrn_measurement_method        '\f and \w scans'
_diffrn_detector_area_resol_mean  ?
_diffrn_reflns_number             13672
_diffrn_reflns_av_unetI/netI      0.0639
_diffrn_reflns_av_R_equivalents   0.0618
_diffrn_reflns_limit_h_min        -8
_diffrn_reflns_limit_h_max        6
_diffrn_reflns_limit_k_min        -15
_diffrn_reflns_limit_k_max        13
_diffrn_reflns_limit_l_min        -32
_diffrn_reflns_limit_l_max        33
_diffrn_reflns_theta_min          3.020
_diffrn_reflns_theta_max          65.036
_diffrn_reflns_theta_full         67.679
_diffrn_measured_fraction_theta_max   0.979
_diffrn_measured_fraction_theta_full  0.924
_diffrn_reflns_Laue_measured_fraction_max    0.979
_diffrn_reflns_Laue_measured_fraction_full   0.924
_diffrn_reflns_point_group_measured_fraction_max   0.962
_diffrn_reflns_point_group_measured_fraction_full  0.905
_reflns_number_total              4337
_reflns_number_gt                 4081
_reflns_threshold_expression      'I > 2\s(I)'
_reflns_Friedel_coverage          0.699
_reflns_Friedel_fraction_max      0.938
_reflns_Friedel_fraction_full     0.880
 
_reflns_special_details
;
 Reflections were merged by SHELXL according to the crystal
 class for the calculation of statistics and refinement.
 
 _reflns_Friedel_fraction is defined as the number of unique
 Friedel pairs measured divided by the number that would be
 possible theoretically, ignoring centric projections and
 systematic absences.
;
 
_computing_data_collection        'Bruker APEX2'
_computing_cell_refinement        'Bruker SAINT'
_computing_data_reduction         'Bruker SAINT'
_computing_structure_solution     'SHELXS-97 (Sheldrick, 2008)'
_computing_structure_refinement   'SHELXL-2014/7 (Sheldrick, 2014)'
_computing_molecular_graphics     'Bruker SHELXTL'
_computing_publication_material   'Bruker SHELXTL'
_refine_special_details           ?
_refine_ls_structure_factor_coef  Fsqd
_refine_ls_matrix_type            full
_refine_ls_weighting_scheme       calc
_refine_ls_weighting_details
'w=1/[\s^2^(Fo^2^)+(0.1179P)^2^+1.5600P] where P=(Fo^2^+2Fc^2^)/3'
_atom_sites_solution_primary      direct
_atom_sites_solution_secondary    difmap
_atom_sites_solution_hydrogens    mixed
_refine_ls_hydrogen_treatment     mixed
_refine_ls_extinction_method      none
_refine_ls_extinction_coef        .
_refine_ls_abs_structure_details
;
 Flack x determined using 1580 quotients [(I+)-(I-)]/[(I+)+(I-)]
 (Parsons, Flack and Wagner, Acta Cryst. B69 (2013) 249-259).
;
_refine_ls_abs_structure_Flack    0.08(10)
_chemical_absolute_configuration  ad
_refine_ls_number_reflns          4337
_refine_ls_number_parameters      428
_refine_ls_number_restraints      9
_refine_ls_R_factor_all           0.0662
_refine_ls_R_factor_gt            0.0636
_refine_ls_wR_factor_ref          0.1826
_refine_ls_wR_factor_gt           0.1807
_refine_ls_goodness_of_fit_ref    1.116
_refine_ls_restrained_S_all       1.115
_refine_ls_shift/su_max           0.000
_refine_ls_shift/su_mean          0.000
 
loop_
 _atom_site_label
 _atom_site_type_symbol
 _atom_site_fract_x
 _atom_site_fract_y
 _atom_site_fract_z
 _atom_site_U_iso_or_equiv
 _atom_site_adp_type
 _atom_site_occupancy
 _atom_site_site_symmetry_order  
 _atom_site_calc_flag
 _atom_site_refinement_flags_posn
 _atom_site_refinement_flags_adp
 _atom_site_refinement_flags_occupancy
 _atom_site_disorder_assembly
 _atom_site_disorder_group
C1 C 0.4252(8) 0.7359(4) 0.21480(17) 0.0179(10) Uani 1 1 d . . . . .
O1 O 0.2854(5) 0.7788(3) 0.18467(11) 0.0209(8) Uani 1 1 d . . . . .
H2 H 0.495(9) 0.639(5) 0.161(2) 0.025 Uiso 1 1 d . U . . .
C2 C 0.5109(7) 0.6417(4) 0.19320(17) 0.0178(10) Uani 1 1 d . . . . .
O2 O 0.7031(5) 0.6264(3) 0.20828(15) 0.0281(9) Uani 1 1 d . . . . .
H2O H 0.762(6) 0.587(6) 0.190(2) 0.042 Uiso 1 1 calc R U . . .
C3 C 0.3866(7) 0.5541(3) 0.21257(16) 0.0162(10) Uani 1 1 d . . . . .
O3 O 0.3777(6) 0.4672(3) 0.19896(13) 0.0277(9) Uani 1 1 d . . . . .
H1 H 0.527(8) 0.783(4) 0.2229(18) 0.016(13) Uiso 1 1 d . . . . .
C4 C 0.1365(8) 0.8256(4) 0.21281(17) 0.0198(11) Uani 1 1 d . . . . .
O4 O 0.2917(5) 0.5861(2) 0.24955(11) 0.0156(7) Uani 1 1 d . . . . .
H5 H 0.029(9) 0.698(4) 0.238(2) 0.025(15) Uiso 1 1 d . . . . .
C5 C 0.1115(7) 0.7468(4) 0.25169(16) 0.0163(10) Uani 1 1 d . . . . .
O5 O -0.0644(5) 0.5334(3) 0.39328(12) 0.0231(8) Uani 1 1 d . . . . .
O6 O 0.5995(6) 0.4205(3) 0.48368(14) 0.0358(10) Uani 1 1 d . . . . .
C6 C 0.0185(8) 0.7884(4) 0.29524(18) 0.0211(11) Uani 1 1 d . . . . .
C30 C 0.2046(8) 0.9304(4) 0.2293(2) 0.0257(12) Uani 1 1 d . . . . .
H30A H 0.2390 0.9728 0.2029 0.038 Uiso 1 1 calc R U . . .
H30B H 0.3180 0.9220 0.2491 0.038 Uiso 1 1 calc R U . . .
H30C H 0.1003 0.9635 0.2466 0.038 Uiso 1 1 calc R U . . .
C29 C -0.0440(8) 0.8374(4) 0.1831(2) 0.0292(13) Uani 1 1 d . . . . .
H29A H -0.0127 0.8789 0.1562 0.044 Uiso 1 1 calc R U . . .
H29B H -0.1462 0.8712 0.2007 0.044 Uiso 1 1 calc R U . . .
H29C H -0.0888 0.7698 0.1733 0.044 Uiso 1 1 calc R U . . .
C28 C 0.1551(9) 0.3927(4) 0.4497(2) 0.0331(14) Uani 1 1 d . . . . .
H28A H 0.0831 0.3621 0.4243 0.050 Uiso 1 1 calc R U . . .
H28B H 0.0727 0.4424 0.4655 0.050 Uiso 1 1 calc R U . . .
H28C H 0.1943 0.3389 0.4712 0.050 Uiso 1 1 calc R U . . .
C7 C -0.0142(7) 0.7017(4) 0.32805(17) 0.0168(10) Uani 1 1 d . . . . .
O7 O 0.7262(7) 0.2761(4) 0.45680(18) 0.0524(14) Uani 1 1 d . . . . .
O10A O 0.959(3) 0.5423(13) 0.1414(5) 0.035(3) Uani 0.64(2) 1 d D U P A 1
H10O H 1.025(15) 0.489(5) 0.143(4) 0.042 Uiso 0.64(2) 1 d D U P A 1
C31 C 1.0175(15) 0.6138(8) 0.1077(4) 0.035(3) Uani 0.64(2) 1 d D U P A 1
H31A H 0.9146 0.6643 0.1031 0.052 Uiso 0.64(2) 1 calc R U P A 1
H31B H 1.0424 0.5779 0.0789 0.052 Uiso 0.64(2) 1 calc R U P A 1
H31C H 1.1358 0.6485 0.1178 0.052 Uiso 0.64(2) 1 calc R U P A 1
O10B O 0.951(6) 0.536(3) 0.1563(9) 0.035(3) Uani 0.36(2) 1 d . . P A 2
O11 O 0.993(3) 0.6469(12) 0.0766(6) 0.066(7) Uani 0.36(2) 1 d . . P A 2
C8 C 0.1278(7) 0.6508(4) 0.34841(15) 0.0146(10) Uani 1 1 d . . . . .
O8 O 0.6153(5) 0.7374(2) 0.38778(11) 0.0151(7) Uani 1 1 d . . . . .
C9 C 0.3437(6) 0.6640(3) 0.34482(16) 0.0131(10) Uani 1 1 d . . . . .
O9 O 0.8156(5) 0.8706(3) 0.39812(13) 0.0251(9) Uani 1 1 d . . . . .
H19A H 0.553(10) 0.696(5) 0.298(2) 0.030 Uiso 1 1 d . U . . .
H19B H 0.432(9) 0.789(5) 0.310(2) 0.030 Uiso 1 1 d . U . . .
H7 H -0.144(10) 0.677(5) 0.335(2) 0.030 Uiso 1 1 d . U . . .
C12 C 0.2949(7) 0.5392(4) 0.39937(16) 0.0158(10) Uani 1 1 d . . . . .
C11 C 0.4126(8) 0.5539(3) 0.35466(16) 0.0150(10) Uani 1 1 d . . . . .
C10 C 0.3120(6) 0.6983(3) 0.25684(16) 0.0135(10) Uani 1 1 d . . . . .
H6B H -0.111(9) 0.815(4) 0.2903(19) 0.016(13) Uiso 1 1 d . . . . .
H6A H 0.094(8) 0.841(4) 0.3129(19) 0.016(13) Uiso 1 1 d . . . . .
H11B H 0.549(9) 0.553(4) 0.3601(19) 0.019 Uiso 1 1 d . U . . .
H11A H 0.378(8) 0.507(4) 0.332(2) 0.019 Uiso 1 1 d . U . . .
C14 C 0.0925(7) 0.5665(4) 0.38221(16) 0.0170(10) Uani 1 1 d . . . . .
C13 C 0.3348(8) 0.4466(4) 0.43128(16) 0.0204(11) Uani 1 1 d . . . . .
C17 C 0.4517(7) 0.4938(4) 0.47131(18) 0.0227(11) Uani 1 1 d . . . . .
C16 C 0.4775(10) 0.3662(4) 0.4128(2) 0.0354(15) Uani 1 1 d . . . . .
H16A H 0.4085 0.3030 0.4038 0.042 Uiso 1 1 calc R U . . .
H16B H 0.5487 0.3930 0.3860 0.042 Uiso 1 1 calc R U . . .
C15 C 0.6130(10) 0.3458(5) 0.4517(2) 0.0363(15) Uani 1 1 d . . . . .
H22 H 0.272(11) 0.655(5) 0.447(3) 0.044 Uiso 1 1 d . U . . .
C19 C 0.4228(7) 0.7151(4) 0.30136(17) 0.0161(10) Uani 1 1 d . . . . .
C25 C 0.4677(7) 0.8899(4) 0.40539(16) 0.0164(10) Uani 1 1 d . . . . .
C20 C 0.5316(8) 0.5955(4) 0.45526(16) 0.0209(11) Uani 1 1 d . . . . .
H20 H 0.6440 0.5819 0.4346 0.025 Uiso 1 1 calc R U . . .
C21 C 0.5986(9) 0.6657(4) 0.49324(19) 0.0299(12) Uani 1 1 d . . . . .
H21A H 0.6400 0.7312 0.4802 0.045 Uiso 1 1 calc R U . . .
H21B H 0.7074 0.6340 0.5094 0.045 Uiso 1 1 calc R U . . .
H21C H 0.4919 0.6773 0.5147 0.045 Uiso 1 1 calc R U . . .
H24 H 0.175(10) 0.832(5) 0.403(2) 0.036 Uiso 1 1 d . U . . .
C22 C 0.3638(7) 0.6361(4) 0.42622(16) 0.0158(10) Uani 1 1 d . . . . .
H17 H 0.373(9) 0.503(4) 0.500(2) 0.019 Uiso 1 1 d . U . . .
C24 C 0.3256(7) 0.8222(4) 0.39951(16) 0.0152(10) Uani 1 1 d . . . . .
C23 C 0.4097(6) 0.7187(4) 0.38972(17) 0.0156(10) Uani 1 1 d . . . . .
C27 C 0.4603(9) 1.0001(4) 0.41988(18) 0.0278(13) Uani 1 1 d . . . . .
H27A H 0.5623 1.0384 0.4041 0.042 Uiso 1 1 calc R U . . .
H27B H 0.4800 1.0047 0.4530 0.042 Uiso 1 1 calc R U . . .
H27C H 0.3338 1.0290 0.4120 0.042 Uiso 1 1 calc R U . . .
C26 C 0.6527(7) 0.8384(4) 0.39749(15) 0.0158(10) Uani 1 1 d . . . . .
 
loop_
 _atom_site_aniso_label
 _atom_site_aniso_U_11
 _atom_site_aniso_U_22
 _atom_site_aniso_U_33
 _atom_site_aniso_U_23
 _atom_site_aniso_U_13
 _atom_site_aniso_U_12
C1 0.021(2) 0.016(2) 0.017(2) 0.0014(19) -0.006(2) -0.004(2)
O1 0.0268(19) 0.0222(17) 0.0139(17) 0.0049(14) -0.0027(15) -0.0006(16)
C2 0.018(2) 0.019(2) 0.016(2) -0.0004(19) 0.004(2) 0.002(2)
O2 0.0179(18) 0.0246(19) 0.042(2) 0.0011(17) 0.0053(18) 0.0003(16)
C3 0.018(2) 0.018(2) 0.012(2) -0.0025(18) -0.006(2) -0.003(2)
O3 0.032(2) 0.0199(18) 0.031(2) -0.0107(15) 0.0048(17) -0.0021(17)
C4 0.023(3) 0.014(2) 0.023(3) 0.0008(19) 0.003(2) 0.002(2)
O4 0.0224(17) 0.0078(14) 0.0167(17) -0.0027(12) -0.0013(15) -0.0013(13)
C5 0.016(2) 0.015(2) 0.018(2) -0.0013(19) 0.000(2) -0.002(2)
O5 0.0195(18) 0.0192(17) 0.031(2) -0.0016(15) 0.0066(16) -0.0051(14)
O6 0.037(2) 0.033(2) 0.038(2) 0.0187(18) -0.008(2) 0.0056(19)
C6 0.017(2) 0.018(2) 0.028(3) 0.000(2) 0.003(2) 0.003(2)
C30 0.027(3) 0.015(2) 0.035(3) 0.003(2) 0.004(2) -0.001(2)
C29 0.024(3) 0.025(3) 0.039(3) 0.015(2) -0.011(3) 0.000(2)
C28 0.039(3) 0.030(3) 0.031(3) 0.013(2) -0.008(3) -0.014(3)
C7 0.013(2) 0.017(2) 0.020(2) -0.0035(19) 0.005(2) 0.000(2)
O7 0.046(3) 0.041(3) 0.070(3) 0.030(2) 0.012(3) 0.024(2)
O10A 0.034(3) 0.032(3) 0.040(9) 0.000(6) 0.019(7) 0.010(2)
C31 0.037(5) 0.036(5) 0.031(7) -0.006(4) 0.008(5) 0.006(4)
O10B 0.034(3) 0.032(3) 0.040(9) 0.000(6) 0.019(7) 0.010(2)
O11 0.095(13) 0.055(10) 0.048(12) 0.004(8) 0.000(9) -0.008(9)
C8 0.018(2) 0.013(2) 0.013(2) -0.0027(18) 0.001(2) 0.0002(19)
O8 0.0156(16) 0.0137(15) 0.0159(16) -0.0025(13) -0.0012(14) -0.0005(13)
C9 0.008(2) 0.013(2) 0.018(2) -0.0021(19) -0.0014(19) 0.0002(18)
O9 0.0166(18) 0.0263(19) 0.032(2) -0.0014(16) -0.0038(16) -0.0075(15)
C12 0.016(2) 0.017(2) 0.015(2) -0.0020(19) 0.004(2) 0.0012(19)
C11 0.020(3) 0.010(2) 0.015(2) -0.0009(18) 0.002(2) 0.0002(19)
C10 0.015(2) 0.008(2) 0.018(2) -0.0043(17) 0.001(2) -0.0047(18)
C14 0.019(3) 0.016(2) 0.016(2) -0.0089(19) 0.005(2) -0.004(2)
C13 0.028(3) 0.017(2) 0.017(2) 0.0031(19) 0.005(2) 0.000(2)
C17 0.019(3) 0.025(3) 0.024(3) 0.005(2) 0.001(2) 0.003(2)
C16 0.051(4) 0.023(3) 0.032(3) 0.007(2) 0.012(3) 0.012(3)
C15 0.039(4) 0.032(3) 0.038(3) 0.020(3) 0.015(3) 0.009(3)
C19 0.015(2) 0.013(2) 0.020(3) -0.0007(19) 0.005(2) -0.0007(19)
C25 0.022(2) 0.017(2) 0.011(2) 0.0008(18) -0.005(2) 0.002(2)
C20 0.027(3) 0.025(3) 0.011(2) 0.0059(19) -0.006(2) 0.003(2)
C21 0.034(3) 0.035(3) 0.021(3) 0.003(2) -0.004(3) -0.003(3)
C22 0.016(2) 0.018(2) 0.014(2) -0.0026(18) 0.005(2) 0.000(2)
C24 0.018(2) 0.015(2) 0.012(2) -0.0018(17) 0.001(2) -0.0007(19)
C23 0.008(2) 0.015(2) 0.023(3) -0.0051(19) 0.001(2) -0.0014(18)
C27 0.043(3) 0.016(3) 0.024(3) -0.004(2) 0.000(3) 0.000(2)
C26 0.021(3) 0.017(2) 0.009(2) 0.0017(18) -0.001(2) -0.004(2)
 
_geom_special_details
;
 All esds (except the esd in the dihedral angle between two l.s. planes)
 are estimated using the full covariance matrix.  The cell esds are taken
 into account individually in the estimation of esds in distances, angles
 and torsion angles; correlations between esds in cell parameters are only
 used when they are defined by crystal symmetry.  An approximate (isotropic)
 treatment of cell esds is used for estimating esds involving l.s. planes.
;
 
loop_
 _geom_bond_atom_site_label_1
 _geom_bond_atom_site_label_2
 _geom_bond_distance
 _geom_bond_site_symmetry_2
 _geom_bond_publ_flag
C1 O1 1.423(6) . ?
C1 C2 1.506(7) . ?
C1 C10 1.538(7) . ?
C1 H1 0.96(6) . ?
O1 C4 1.452(6) . ?
C2 O2 1.413(6) . ?
C2 C3 1.539(7) . ?
C2 H2 0.96(6) . ?
O2 H2O 0.85(8) . ?
C3 O3 1.205(6) . ?
C3 O4 1.333(6) . ?
C4 C30 1.527(7) . ?
C4 C29 1.528(8) . ?
C4 C5 1.545(7) . ?
O4 C10 1.489(5) . ?
C5 C6 1.527(7) . ?
C5 C10 1.531(7) . ?
C5 H5 0.95(6) . ?
O5 C14 1.211(6) . ?
O6 C15 1.356(8) . ?
O6 C17 1.446(6) . ?
C6 C7 1.502(7) . ?
C6 H6B 0.98(6) . ?
C6 H6A 1.01(6) . ?
C30 H30A 0.9800 . ?
C30 H30B 0.9800 . ?
C30 H30C 0.9800 . ?
C29 H29A 0.9800 . ?
C29 H29B 0.9800 . ?
C29 H29C 0.9800 . ?
C28 C13 1.526(8) . ?
C28 H28A 0.9800 . ?
C28 H28B 0.9800 . ?
C28 H28C 0.9800 . ?
C7 C8 1.327(7) . ?
C7 H7 0.97(7) . ?
O7 C15 1.211(7) . ?
O10A C31 1.417(17) . ?
O10A H10O 0.84(3) . ?
C31 H31A 0.9800 . ?
C31 H31B 0.9800 . ?
C31 H31C 0.9800 . ?
C8 C14 1.501(7) . ?
C8 C9 1.505(7) . ?
O8 C26 1.375(6) . ?
O8 C23 1.443(5) . ?
C9 C19 1.537(7) . ?
C9 C11 1.543(6) . ?
C9 C23 1.564(7) . ?
O9 C26 1.202(6) . ?
C12 C14 1.527(7) . ?
C12 C13 1.553(6) . ?
C12 C11 1.553(7) . ?
C12 C22 1.565(7) . ?
C11 H11B 0.95(6) . ?
C11 H11A 0.94(6) . ?
C10 C19 1.527(7) . ?
C13 C16 1.539(8) . ?
C13 C17 1.551(8) . ?
C17 C20 1.514(7) . ?
C17 H17 1.01(6) . ?
C16 C15 1.496(9) . ?
C16 H16A 0.9900 . ?
C16 H16B 0.9900 . ?
C19 H19A 0.94(7) . ?
C19 H19B 1.00(7) . ?
C25 C24 1.333(7) . ?
C25 C26 1.463(7) . ?
C25 C27 1.502(7) . ?
C20 C21 1.514(7) . ?
C20 C22 1.533(7) . ?
C20 H20 1.0000 . ?
C21 H21A 0.9800 . ?
C21 H21B 0.9800 . ?
C21 H21C 0.9800 . ?
C22 C23 1.551(7) . ?
C22 H22 0.91(8) . ?
C24 C23 1.500(6) . ?
C24 H24 1.06(7) . ?
C27 H27A 0.9800 . ?
C27 H27B 0.9800 . ?
C27 H27C 0.9800 . ?
 
loop_
 _geom_angle_atom_site_label_1
 _geom_angle_atom_site_label_2
 _geom_angle_atom_site_label_3
 _geom_angle
 _geom_angle_site_symmetry_1
 _geom_angle_site_symmetry_3
 _geom_angle_publ_flag
O1 C1 C2 109.2(4) . . ?
O1 C1 C10 106.1(4) . . ?
C2 C1 C10 105.9(4) . . ?
O1 C1 H1 113(3) . . ?
C2 C1 H1 110(3) . . ?
C10 C1 H1 112(3) . . ?
C1 O1 C4 107.2(4) . . ?
O2 C2 C1 110.7(4) . . ?
O2 C2 C3 107.7(4) . . ?
C1 C2 C3 103.5(4) . . ?
O2 C2 H2 114(4) . . ?
C1 C2 H2 113(4) . . ?
C3 C2 H2 106(4) . . ?
C2 O2 H2O 109.5 . . ?
O3 C3 O4 122.6(4) . . ?
O3 C3 C2 127.4(4) . . ?
O4 C3 C2 109.9(4) . . ?
O1 C4 C30 109.8(4) . . ?
O1 C4 C29 107.3(4) . . ?
C30 C4 C29 109.9(4) . . ?
O1 C4 C5 102.5(4) . . ?
C30 C4 C5 113.5(4) . . ?
C29 C4 C5 113.3(4) . . ?
C3 O4 C10 112.3(3) . . ?
C6 C5 C10 116.5(4) . . ?
C6 C5 C4 115.1(4) . . ?
C10 C5 C4 104.3(4) . . ?
C6 C5 H5 110(4) . . ?
C10 C5 H5 108(4) . . ?
C4 C5 H5 102(3) . . ?
C15 O6 C17 110.6(4) . . ?
C7 C6 C5 109.1(4) . . ?
C7 C6 H6B 103(3) . . ?
C5 C6 H6B 113(3) . . ?
C7 C6 H6A 106(3) . . ?
C5 C6 H6A 117(3) . . ?
H6B C6 H6A 108(4) . . ?
C4 C30 H30A 109.5 . . ?
C4 C30 H30B 109.5 . . ?
H30A C30 H30B 109.5 . . ?
C4 C30 H30C 109.5 . . ?
H30A C30 H30C 109.5 . . ?
H30B C30 H30C 109.5 . . ?
C4 C29 H29A 109.5 . . ?
C4 C29 H29B 109.5 . . ?
H29A C29 H29B 109.5 . . ?
C4 C29 H29C 109.5 . . ?
H29A C29 H29C 109.5 . . ?
H29B C29 H29C 109.5 . . ?
C13 C28 H28A 109.5 . . ?
C13 C28 H28B 109.5 . . ?
H28A C28 H28B 109.5 . . ?
C13 C28 H28C 109.5 . . ?
H28A C28 H28C 109.5 . . ?
H28B C28 H28C 109.5 . . ?
C8 C7 C6 123.6(5) . . ?
C8 C7 H7 115(4) . . ?
C6 C7 H7 122(4) . . ?
C31 O10A H10O 115(8) . . ?
O10A C31 H31A 109.5 . . ?
O10A C31 H31B 109.5 . . ?
H31A C31 H31B 109.5 . . ?
O10A C31 H31C 109.5 . . ?
H31A C31 H31C 109.5 . . ?
H31B C31 H31C 109.5 . . ?
C7 C8 C14 123.0(5) . . ?
C7 C8 C9 130.1(5) . . ?
C14 C8 C9 106.9(4) . . ?
C26 O8 C23 109.8(4) . . ?
C8 C9 C19 117.4(4) . . ?
C8 C9 C11 100.7(4) . . ?
C19 C9 C11 116.8(4) . . ?
C8 C9 C23 106.4(4) . . ?
C19 C9 C23 113.1(4) . . ?
C11 C9 C23 100.3(4) . . ?
C14 C12 C13 122.8(4) . . ?
C14 C12 C11 100.0(4) . . ?
C13 C12 C11 120.7(4) . . ?
C14 C12 C22 104.7(4) . . ?
C13 C12 C22 106.0(4) . . ?
C11 C12 C22 99.4(4) . . ?
C9 C11 C12 96.4(4) . . ?
C9 C11 H11B 110(3) . . ?
C12 C11 H11B 112(3) . . ?
C9 C11 H11A 114(3) . . ?
C12 C11 H11A 113(3) . . ?
H11B C11 H11A 111(5) . . ?
O4 C10 C19 108.1(3) . . ?
O4 C10 C5 108.0(3) . . ?
C19 C10 C5 118.6(4) . . ?
O4 C10 C1 104.4(3) . . ?
C19 C10 C1 112.4(4) . . ?
C5 C10 C1 104.4(4) . . ?
O5 C14 C8 125.7(5) . . ?
O5 C14 C12 130.4(4) . . ?
C8 C14 C12 103.9(4) . . ?
C28 C13 C16 109.2(5) . . ?
C28 C13 C17 109.9(4) . . ?
C16 C13 C17 101.7(4) . . ?
C28 C13 C12 115.3(4) . . ?
C16 C13 C12 115.8(4) . . ?
C17 C13 C12 103.7(4) . . ?
O6 C17 C20 113.7(4) . . ?
O6 C17 C13 107.1(4) . . ?
C20 C17 C13 107.7(4) . . ?
O6 C17 H17 104(3) . . ?
C20 C17 H17 111(3) . . ?
C13 C17 H17 113(3) . . ?
C15 C16 C13 104.8(5) . . ?
C15 C16 H16A 110.8 . . ?
C13 C16 H16A 110.8 . . ?
C15 C16 H16B 110.8 . . ?
C13 C16 H16B 110.8 . . ?
H16A C16 H16B 108.9 . . ?
O7 C15 O6 120.1(6) . . ?
O7 C15 C16 129.2(6) . . ?
O6 C15 C16 110.7(5) . . ?
C10 C19 C9 117.7(4) . . ?
C10 C19 H19A 111(4) . . ?
C9 C19 H19A 108(4) . . ?
C10 C19 H19B 113(4) . . ?
C9 C19 H19B 104(3) . . ?
H19A C19 H19B 103(5) . . ?
C24 C25 C26 108.5(4) . . ?
C24 C25 C27 130.4(5) . . ?
C26 C25 C27 121.0(5) . . ?
C21 C20 C17 114.6(4) . . ?
C21 C20 C22 115.4(4) . . ?
C17 C20 C22 101.6(4) . . ?
C21 C20 H20 108.3 . . ?
C17 C20 H20 108.3 . . ?
C22 C20 H20 108.3 . . ?
C20 C21 H21A 109.5 . . ?
C20 C21 H21B 109.5 . . ?
H21A C21 H21B 109.5 . . ?
C20 C21 H21C 109.5 . . ?
H21A C21 H21C 109.5 . . ?
H21B C21 H21C 109.5 . . ?
C20 C22 C23 117.9(4) . . ?
C20 C22 C12 103.2(4) . . ?
C23 C22 C12 106.2(4) . . ?
C20 C22 H22 105(5) . . ?
C23 C22 H22 114(4) . . ?
C12 C22 H22 110(5) . . ?
C25 C24 C23 109.8(4) . . ?
C25 C24 H24 129(4) . . ?
C23 C24 H24 121(4) . . ?
O8 C23 C24 103.6(4) . . ?
O8 C23 C22 110.3(4) . . ?
C24 C23 C22 114.6(4) . . ?
O8 C23 C9 109.4(4) . . ?
C24 C23 C9 117.4(4) . . ?
C22 C23 C9 101.6(3) . . ?
C25 C27 H27A 109.5 . . ?
C25 C27 H27B 109.5 . . ?
H27A C27 H27B 109.5 . . ?
C25 C27 H27C 109.5 . . ?
H27A C27 H27C 109.5 . . ?
H27B C27 H27C 109.5 . . ?
O9 C26 O8 121.0(4) . . ?
O9 C26 C25 130.9(4) . . ?
O8 C26 C25 108.1(4) . . ?
 
loop_
 _geom_torsion_atom_site_label_1
 _geom_torsion_atom_site_label_2
 _geom_torsion_atom_site_label_3
 _geom_torsion_atom_site_label_4
 _geom_torsion
 _geom_torsion_site_symmetry_1
 _geom_torsion_site_symmetry_2
 _geom_torsion_site_symmetry_3
 _geom_torsion_site_symmetry_4
 _geom_torsion_publ_flag
C2 C1 O1 C4 147.8(4) . . . . ?
C10 C1 O1 C4 34.0(5) . . . . ?
O1 C1 C2 O2 150.7(4) . . . . ?
C10 C1 C2 O2 -95.4(4) . . . . ?
O1 C1 C2 C3 -94.1(4) . . . . ?
C10 C1 C2 C3 19.7(5) . . . . ?
O2 C2 C3 O3 -77.3(6) . . . . ?
C1 C2 C3 O3 165.4(5) . . . . ?
O2 C2 C3 O4 99.6(5) . . . . ?
C1 C2 C3 O4 -17.7(5) . . . . ?
C1 O1 C4 C30 80.3(5) . . . . ?
C1 O1 C4 C29 -160.2(4) . . . . ?
C1 O1 C4 C5 -40.7(5) . . . . ?
O3 C3 O4 C10 -174.9(4) . . . . ?
C2 C3 O4 C10 8.1(5) . . . . ?
O1 C4 C5 C6 159.6(4) . . . . ?
C30 C4 C5 C6 41.3(6) . . . . ?
C29 C4 C5 C6 -85.0(5) . . . . ?
O1 C4 C5 C10 30.8(5) . . . . ?
C30 C4 C5 C10 -87.6(5) . . . . ?
C29 C4 C5 C10 146.1(4) . . . . ?
C10 C5 C6 C7 -62.9(5) . . . . ?
C4 C5 C6 C7 174.5(4) . . . . ?
C5 C6 C7 C8 67.8(6) . . . . ?
C6 C7 C8 C14 178.0(4) . . . . ?
C6 C7 C8 C9 0.0(8) . . . . ?
C7 C8 C9 C19 -23.6(7) . . . . ?
C14 C8 C9 C19 158.2(4) . . . . ?
C7 C8 C9 C11 -151.4(5) . . . . ?
C14 C8 C9 C11 30.3(4) . . . . ?
C7 C8 C9 C23 104.3(6) . . . . ?
C14 C8 C9 C23 -74.0(4) . . . . ?
C8 C9 C11 C12 -51.1(4) . . . . ?
C19 C9 C11 C12 -179.4(4) . . . . ?
C23 C9 C11 C12 58.0(4) . . . . ?
C14 C12 C11 C9 53.6(4) . . . . ?
C13 C12 C11 C9 -168.3(4) . . . . ?
C22 C12 C11 C9 -53.3(4) . . . . ?
C3 O4 C10 C19 -115.1(4) . . . . ?
C3 O4 C10 C5 115.5(4) . . . . ?
C3 O4 C10 C1 4.8(5) . . . . ?
C6 C5 C10 O4 110.2(4) . . . . ?
C4 C5 C10 O4 -121.8(4) . . . . ?
C6 C5 C10 C19 -13.1(6) . . . . ?
C4 C5 C10 C19 114.9(4) . . . . ?
C6 C5 C10 C1 -139.2(4) . . . . ?
C4 C5 C10 C1 -11.2(5) . . . . ?
O1 C1 C10 O4 100.3(4) . . . . ?
C2 C1 C10 O4 -15.7(5) . . . . ?
O1 C1 C10 C19 -142.7(4) . . . . ?
C2 C1 C10 C19 101.3(5) . . . . ?
O1 C1 C10 C5 -12.9(5) . . . . ?
C2 C1 C10 C5 -128.9(4) . . . . ?
C7 C8 C14 O5 2.9(7) . . . . ?
C9 C8 C14 O5 -178.7(5) . . . . ?
C7 C8 C14 C12 -174.7(4) . . . . ?
C9 C8 C14 C12 3.8(5) . . . . ?
C13 C12 C14 O5 9.7(8) . . . . ?
C11 C12 C14 O5 146.6(5) . . . . ?
C22 C12 C14 O5 -110.9(6) . . . . ?
C13 C12 C14 C8 -172.9(4) . . . . ?
C11 C12 C14 C8 -36.0(4) . . . . ?
C22 C12 C14 C8 66.5(4) . . . . ?
C14 C12 C13 C28 -7.9(7) . . . . ?
C11 C12 C13 C28 -136.4(5) . . . . ?
C22 C12 C13 C28 112.1(5) . . . . ?
C14 C12 C13 C16 121.4(5) . . . . ?
C11 C12 C13 C16 -7.1(7) . . . . ?
C22 C12 C13 C16 -118.6(5) . . . . ?
C14 C12 C13 C17 -128.1(5) . . . . ?
C11 C12 C13 C17 103.4(5) . . . . ?
C22 C12 C13 C17 -8.2(5) . . . . ?
C15 O6 C17 C20 -107.1(5) . . . . ?
C15 O6 C17 C13 11.8(6) . . . . ?
C28 C13 C17 O6 95.1(5) . . . . ?
C16 C13 C17 O6 -20.6(5) . . . . ?
C12 C13 C17 O6 -141.1(4) . . . . ?
C28 C13 C17 C20 -142.3(4) . . . . ?
C16 C13 C17 C20 102.1(4) . . . . ?
C12 C13 C17 C20 -18.4(5) . . . . ?
C28 C13 C16 C15 -94.6(6) . . . . ?
C17 C13 C16 C15 21.5(5) . . . . ?
C12 C13 C16 C15 133.2(5) . . . . ?
C17 O6 C15 O7 -178.2(5) . . . . ?
C17 O6 C15 C16 2.8(6) . . . . ?
C13 C16 C15 O7 164.9(6) . . . . ?
C13 C16 C15 O6 -16.2(7) . . . . ?
O4 C10 C19 C9 -54.5(5) . . . . ?
C5 C10 C19 C9 68.7(5) . . . . ?
C1 C10 C19 C9 -169.2(4) . . . . ?
C8 C9 C19 C10 -31.9(6) . . . . ?
C11 C9 C19 C10 87.9(5) . . . . ?
C23 C9 C19 C10 -156.4(4) . . . . ?
O6 C17 C20 C21 -78.5(6) . . . . ?
C13 C17 C20 C21 163.0(5) . . . . ?
O6 C17 C20 C22 156.4(4) . . . . ?
C13 C17 C20 C22 37.9(5) . . . . ?
C21 C20 C22 C23 77.0(5) . . . . ?
C17 C20 C22 C23 -158.4(4) . . . . ?
C21 C20 C22 C12 -166.3(4) . . . . ?
C17 C20 C22 C12 -41.7(5) . . . . ?
C14 C12 C22 C20 162.4(4) . . . . ?
C13 C12 C22 C20 31.2(5) . . . . ?
C11 C12 C22 C20 -94.6(4) . . . . ?
C14 C12 C22 C23 -72.9(4) . . . . ?
C13 C12 C22 C23 155.9(4) . . . . ?
C11 C12 C22 C23 30.1(4) . . . . ?
C26 C25 C24 C23 3.1(5) . . . . ?
C27 C25 C24 C23 -173.8(5) . . . . ?
C26 O8 C23 C24 2.8(5) . . . . ?
C26 O8 C23 C22 -120.4(4) . . . . ?
C26 O8 C23 C9 128.7(4) . . . . ?
C25 C24 C23 O8 -3.7(5) . . . . ?
C25 C24 C23 C22 116.6(4) . . . . ?
C25 C24 C23 C9 -124.3(4) . . . . ?
C20 C22 C23 O8 4.2(6) . . . . ?
C12 C22 C23 O8 -110.8(4) . . . . ?
C20 C22 C23 C24 -112.3(5) . . . . ?
C12 C22 C23 C24 132.7(4) . . . . ?
C20 C22 C23 C9 120.1(4) . . . . ?
C12 C22 C23 C9 5.1(4) . . . . ?
C8 C9 C23 O8 -177.8(4) . . . . ?
C19 C9 C23 O8 -47.5(5) . . . . ?
C11 C9 C23 O8 77.7(4) . . . . ?
C8 C9 C23 C24 -60.2(5) . . . . ?
C19 C9 C23 C24 70.2(5) . . . . ?
C11 C9 C23 C24 -164.7(4) . . . . ?
C8 C9 C23 C22 65.6(4) . . . . ?
C19 C9 C23 C22 -164.0(4) . . . . ?
C11 C9 C23 C22 -38.9(4) . . . . ?
C23 O8 C26 O9 179.4(4) . . . . ?
C23 O8 C26 C25 -1.1(5) . . . . ?
C24 C25 C26 O9 178.1(5) . . . . ?
C27 C25 C26 O9 -4.6(8) . . . . ?
C24 C25 C26 O8 -1.4(5) . . . . ?
C27 C25 C26 O8 175.9(4) . . . . ?
 
_refine_diff_density_max    0.525
_refine_diff_density_min   -0.424
_refine_diff_density_rms    0.091

_shelxl_version_number 2014/6

# start Validation Reply Form
_vrf_PLAT430_I
;
PROBLEM: Short Inter D...A Contact  O7     ..  O11     ..       2.75 Ang. 
RESPONSE: This alert is due to the disordering effect of solvents.
;
# end Validation Reply Form

_shelx_hkl_file
;
  -2   0   0 2711.33  216.18
  -4   0   0 1211.58   96.59
   5   0   0    0.90    2.20
  -5   0   0    1.10    0.90
  -5   0   0    0.40    3.80
  -6   0   0   25.90    6.90
  -6   0   0   22.80    3.50
  -7   0   0    4.30    5.10
  -7   0   0    1.40    2.00
  -8   0   0    3.00    3.80
   0   1   0   -0.90    0.20
  -1   1   0 2320.67  184.88
  -2   1   0 1371.16  100.99
  -2  -1   0 1160.68  101.39
  -3  -1   0    6.20    2.30
  -4  -1   0  133.49   10.60
  -4  -1   0  113.29   11.10
   5   1   0 1218.98   95.09
  -5  -1   0 1168.98   95.69
  -5  -1   0 1046.00   93.19
  -5   1   0 1193.08   92.69
  -5  -1   0 1269.07   93.59
  -5   1   0 1061.59   95.89
  -6   1   0  504.65   48.60
  -6  -1   0  557.64   48.30
  -6   1   0  585.44   44.80
  -7   1   0   54.19    5.20
  -7   1   0   43.90    9.30
  -7  -1   0   51.09    6.20
  -7  -1   0   40.50    8.30
  -8  -1   0   15.40    4.60
  -8   1   0   17.50    4.90
   0   2   0  951.60   75.89
  -1   2   0  234.58   18.90
  -2   2   0  540.55   42.40
  -2  -2   0  517.75   43.10
  -3  -2   0 1871.21  149.99
  -4   2   0   29.80    9.40
  -4  -2   0   24.60    4.50
  -4  -2   0   31.40    7.70
  -4  -2   0   33.70    4.10
   5   2   0  497.55   41.90
  -5  -2   0  533.65   40.70
  -5   2   0  422.06   42.80
  -5  -2   0  502.65   42.40
  -6  -2   0   27.70    4.50
  -6   2   0   21.10    2.50
  -6  -2   0   17.30    5.90
  -6   2   0   20.00    7.40
  -7  -2   0   76.49   10.50
  -7   2   0   63.79   11.20
  -8  -2   0   71.19    8.80
   0   3   0    1.50    0.70
   0   3   0    2.10    0.90
  -1  -3   0  146.79   13.00
  -1   3   0  142.39   11.20
  -1   3   0  129.49   11.30
  -2   3   0  538.95   40.20
  -2  -3   0  507.25   41.30
  -2   3   0  462.45   40.10
  -3  -3   0  203.78   18.10
  -4   3   0  139.39   15.80
  -4   3   0  134.59   20.60
  -4  -3   0  183.38   14.90
  -4  -3   0  152.98   14.50
  -5  -3   0    6.20    3.90
  -5  -3   0    8.00    2.60
  -5   3   0    8.30    5.00
   5   3   0   11.10    3.80
  -5  -3   0   14.00    4.10
  -6  -3   0  230.28   24.10
  -6  -3   0  279.37   22.80
  -7   3   0   71.29   11.80
  -7  -3   0   79.49   10.60
   0   4   0  203.78   17.70
   0   4   0  228.78   17.80
  -1   4   0 2864.31  236.38
  -1   4   0 3016.80  236.38
   1   4   0 2998.10  236.58
  -1  -4   0 2986.20  237.38
  -2  -4   0  359.36   29.90
  -2   4   0  347.17   28.40
  -3  -4   0  274.57   24.00
  -4   4   0   30.00    7.30
  -4  -4   0   48.50    5.70
  -4   4   0   43.20   12.70
  -4  -4   0   42.80    5.90
  -4  -4   0   43.70    6.60
  -4   4   0   44.90    4.20
  -5  -4   0  788.22   65.99
  -5   4   0  820.62   63.99
   5   4   0  805.82   66.39
  -5  -4   0  857.11   65.49
  -5  -4   0  688.73   64.99
  -6  -4   0 1212.58   89.99
  -6  -4   0  979.60   90.39
  -7  -4   0   10.50    4.50
   0   5   0   -0.30    1.10
   0   5   0    0.20    1.20
  -1   5   0  326.17   27.40
   1   5   0  364.96   28.00
   1   5   0  307.87   27.50
  -1  -5   0  357.16   29.20
  -2   5   0   36.90    3.90
  -2  -5   0   40.00    6.50
  -3   5   0  359.76   29.20
  -3   5   0  355.86   29.80
  -3  -5   0  373.36   31.40
  -4  -5   0  362.26   30.50
  -4  -5   0  344.37   31.10
  -4   5   0  345.67   29.40
  -4  -5   0  360.56   30.50
   4   5   0  367.96   31.10
  -5  -5   0    5.50    3.00
  -5  -5   0    5.90    3.70
  -5  -5   0   15.40    5.20
   5   5   0   12.70    4.30
  -5   5   0   12.70    1.90
  -5   5   0   15.60    6.50
  -5   5   0   10.80    2.50
  -6  -5   0  374.66   30.70
  -6  -5   0  312.67   30.80
  -6   5   0  354.36   28.40
  -7  -5   0   -0.30    3.60
   0   6   0   20.10    2.80
  -1   6   0   57.39    5.90
   1   6   0   66.19    6.40
  -1  -6   0   73.19    8.80
   1   6   0   58.89    6.10
  -2  -6   0  324.67   29.50
   2   6   0  340.87   28.30
  -2   6   0  331.27   27.30
   3   6   0  273.77   31.30
   3   6   0  377.26   29.10
  -3   6   0  309.27   27.90
  -3  -6   0  366.06   30.00
  -3   6   0  329.17   27.20
  -4   6   0   21.50    3.80
  -4  -6   0   22.70    4.70
   4   6   0   25.60    5.10
  -4  -6   0   33.80    6.90
  -4  -6   0   22.00    4.60
  -5  -6   0  490.95   42.30
  -5  -6   0  475.55   42.60
  -5  -6   0  502.55   42.50
  -5   6   0  510.75   40.90
  -6   6   0  561.64   43.00
  -6  -6   0  555.94   45.40
  -6  -6   0  470.25   45.10
  -7  -6   0    7.90    3.20
  -7  -6   0    5.00    4.10
   0   7   0   -0.30    1.50
  -1  -7   0  204.78   20.30
   1   7   0  208.08   18.10
  -1   7   0  222.18   18.00
   2   7   0    4.70    2.30
  -2  -7   0    4.40    2.40
  -2   7   0    5.10    4.50
  -2  -7   0    4.50    4.80
   2   7   0   10.70    6.50
  -3  -7   0  179.98   18.20
   3   7   0  176.18   16.30
  -3   7   0  144.49   15.30
  -3   7   0  191.08   14.60
   3   7   0  157.78   19.70
   4   7   0  209.28   24.30
  -4   7   0  201.68   18.40
   4   7   0  208.28   19.80
  -4  -7   0  220.18   21.20
  -5  -7   0   23.50    5.70
  -5  -7   0   24.30    5.80
  -5  -7   0   39.60    7.90
  -5   7   0   26.20    4.30
  -6   7   0  112.29    9.50
  -6  -7   0   99.79   12.00
  -6  -7   0  106.69   12.30
  -7  -7   0   91.89    9.40
  -7  -7   0   78.29    9.90
   0  -8   0    6.90    2.40
   0   8   0    5.30    2.20
   0   8   0    6.50    5.30
   1   8   0  680.13   55.19
  -1   8   0  708.23   55.09
   1   8   0  626.94   57.49
  -1  -8   0  683.23   55.29
  -2   8   0  142.59   12.40
  -2  -8   0  136.19   16.10
   2   8   0  119.39   16.90
   2   8   0  137.99   13.40
  -2  -8   0  146.69   13.00
   3   8   0   19.30    4.80
  -3  -8   0   30.00    7.50
   3   8   0   36.50    9.60
   4   8   0  130.39   18.50
  -4   8   0  102.09   10.90
   4   8   0  104.09   12.30
  -4  -8   0  117.39   15.00
   5   8   0  217.78   24.20
  -5  -8   0  189.78   20.10
  -5   8   0  180.58   16.50
  -5  -8   0  187.28   18.10
  -5  -8   0  177.48   18.60
  -6  -8   0    7.60    4.50
  -6   8   0   11.60    2.10
  -6   8   0   14.70    2.00
  -6  -8   0    8.30    4.50
   0  -9   0    0.20    2.20
   0   9   0   -0.80    4.90
   0   9   0   -0.10    2.20
   1  -9   0  271.27   25.00
  -1   9   0  329.57   25.10
   1   9   0  305.97   25.20
   1   9   0  282.07   28.40
  -1  -9   0  282.47   25.20
  -2  -9   0  188.98   20.60
   2   9   0  196.48   21.70
  -2   9   0  200.08   16.80
  -2  -9   0  181.88   17.30
  -3   9   0   63.29    7.20
  -3  -9   0   75.19   11.80
   3   9   0   79.29   14.00
  -4  -9   0   98.99   15.10
   4   9   0  149.49   19.80
  -5   9   0   -1.10    2.10
   5   9   0   -3.20    8.30
  -5  -9   0   -1.50    3.60
   6   9   0   87.49   16.70
  -6   9   0   68.09    5.90
  -6  -9   0   60.79    8.70
  -6  -9   0   56.89    9.30
   0  10   0  839.42   67.89
   0  10   0  829.82   69.39
   0 -10   0  822.62   67.99
   1 -10   0   -1.60    2.60
   1  10   0   -5.60    6.00
  -1 -10   0    0.20    2.70
   1  10   0    0.80    2.80
  -1  10   0    0.40    2.60
   2  10   0    7.60    7.80
  -2 -10   0    5.00    3.30
  -2 -10   0   11.00    5.50
  -3  10   0  155.18   14.40
   3  10   0  180.58   21.60
  -3 -10   0  151.18   19.30
  -4 -10   0 1038.00   92.59
   4  10   0 1195.18   95.59
   5  10   0   82.79   14.30
  -5  10   0   66.09    7.20
  -5 -10   0   70.79    9.60
  -6 -10   0   39.00    6.60
   0  11   0   -0.10    3.20
   0 -11   0   -0.90    3.00
   1  11   0   45.70   10.00
  -1 -11   0   35.50    6.20
  -1  11   0   60.89    7.10
   1  11   0   38.10    6.30
   1 -11   0   33.00    6.00
   2  11   0  308.17   32.80
  -2 -11   0  397.36   30.90
  -2  11   0  290.77   27.90
  -3 -11   0  543.55   51.49
  -3  11   0  576.04   48.30
   3  11   0  654.03   54.29
   4  11   0   39.40   11.50
   5  11   0   77.99   13.20
  -5 -11   0   80.49    9.80
   0 -12   0   78.79    9.90
   0  12   0   87.09   10.30
   1  12   0  243.08   22.00
   1 -12   0  193.18   19.00
  -1 -12   0  190.48   19.10
  -1  12   0  213.08   19.10
   2 -12   0    9.40    4.20
   2  12   0   19.00    8.30
   2 -12   0   20.40    7.60
  -2 -12   0   13.00    6.10
   3  12   0  129.19   18.20
  -4 -12   0  330.57   27.80
   4  12   0  285.07   30.60
  -5 -12   0   39.10    6.40
   5  12   0   48.80   12.40
   0 -13   0   -1.90    3.20
   0 -13   0    3.70    5.70
   1 -13   0   38.00    6.60
  -1 -13   0   51.39    9.20
   1 -13   0   54.99    9.40
  -2 -13   0  157.18   17.60
   2 -13   0  179.08   18.90
   2  13   0  166.98   18.40
   3  13   0  145.69   17.50
  -4 -13   0   65.69    7.90
   4  13   0   55.29    9.40
   0 -14   0   62.49   10.20
   1 -14   0   14.80    6.30
  -1 -14   0   17.60    6.50
  -2 -14   0    8.80    6.80
   2 -14   0    9.20    6.30
   0 -15   0   -1.70    4.50
   1 -15   0    6.50    5.10
  -1 -15   0   11.50    5.40
  -1   0   1 1586.24  126.39
  -2   0   1  185.18   15.20
  -4   0  -1  143.09   11.90
  -4   0   1  153.98   12.00
  -5   0  -1   20.70    2.60
   5   0  -1   21.40    4.50
  -5   0   1   22.60    2.90
  -5   0  -1   20.80    5.60
  -5   0   1   18.80    5.70
  -5   0   1   21.10    2.40
  -6   0  -1  513.85   46.60
  -6   0   1  557.24   43.20
  -6   0   1  503.45   46.50
  -6   0  -1  532.95   43.20
  -7   0   1  165.48   13.80
  -7   0  -1  133.39   16.90
  -7   0   1  146.29   17.20
  -7   0  -1  166.58   13.80
  -8   0   1   53.09    7.70
  -8   0  -1   53.09    7.80
   0   1   1 1264.97  106.19
   0   1  -1 1389.86  106.39
  -1   1   1 6279.57  500.35
  -2   1   1 2063.99  150.58
  -2  -1  -1 1717.23  150.98
  -2  -1   1 1887.61  150.98
  -3  -1  -1  153.88   13.60
  -3  -1   1  162.28   13.60
  -4  -1  -1  768.72   66.89
  -4  -1  -1  875.51   66.69
  -4  -1   1  850.21   67.09
  -5  -1  -1   16.80    2.70
  -5   1   1   20.20    2.00
  -5  -1  -1   19.50    3.20
  -5   1   1   19.30    5.40
  -5  -1  -1   22.80    5.60
  -5  -1   1   17.30    5.00
  -5  -1   1   18.70    2.70
  -5   1  -1   20.40    5.90
  -5  -1   1   20.70    3.20
  -5   1  -1   18.20    1.90
  -6  -1  -1   32.50    7.60
  -6   1   1   25.30    3.10
  -6  -1  -1   27.20    4.20
  -6   1   1   27.40    8.00
  -6  -1   1   21.20    6.50
  -6   1  -1   22.30    7.20
  -6   1  -1   23.50    3.20
  -7   1   1   52.49   10.30
  -7   1   1   84.89    7.40
  -7  -1  -1   78.59    8.10
  -7  -1  -1   74.49   11.30
  -7   1  -1   65.79   11.20
  -7  -1   1   79.49    8.20
  -7   1  -1   87.49    7.20
  -7  -1   1   71.19   11.00
  -8   1   1   10.70    4.10
  -8  -1  -1   13.30    4.60
  -8   1  -1   12.00    4.50
  -8  -1   1   13.20    4.40
   0   2  -1 2199.68  170.68
   0   2   1 2076.69  170.48
  -1   2   1 1472.15  117.39
  -2  -2  -1  583.84   49.50
  -2   2   1  669.03   48.80
  -2   2   1  582.04   48.70
  -2  -2   1  599.44   49.40
  -3  -2  -1   45.00    5.70
  -3  -2   1   47.10    5.90
  -4  -2  -1   34.10    4.00
  -4  -2  -1   30.60    6.30
  -4   2   1   23.80    7.80
  -4  -2  -1   30.30    4.60
  -4   2  -1   25.70    9.80
  -4   2  -1   35.70    9.50
  -4  -2   1   29.00    4.60
  -5  -2  -1  231.98   20.90
   5   2  -1  211.98   20.20
  -5   2   1  198.98   21.60
  -5  -2  -1  238.18   19.10
  -5  -2   1  223.18   20.90
  -5   2  -1  182.28   33.10
  -5   2  -1  191.68   21.50
  -5  -2   1  253.07   19.20
  -5  -2   1  203.48   18.80
  -6   2   1  190.28   15.00
  -6  -2  -1  172.88   18.60
  -6   2   1  141.69   19.40
  -6  -2  -1  197.58   16.40
  -6  -2   1  202.28   16.30
  -6  -2   1  176.68   18.70
  -6   2  -1  151.78   19.70
  -7  -2  -1  393.76   33.10
  -7   2   1  341.87   33.30
  -7   2  -1  320.37   33.30
  -7  -2   1  397.06   33.10
  -8  -2  -1    3.80    3.60
  -8  -2   1    4.20    3.60
   0   3   1  203.78   17.00
   0   3  -1  216.08   17.20
  -1   3   1 1198.28   93.39
  -1   3   1 1090.09   93.39
  -1  -3  -1 1256.57   94.39
  -1  -3   1 1153.78   94.19
  -1   3  -1 1161.48   93.39
  -2   3   1 1477.75  123.79
  -2   3   1 1647.94  123.89
  -2  -3  -1 1596.24  124.89
  -2  -3   1 1541.65  124.69
  -2   3  -1 1506.85  123.79
  -3  -3  -1   68.09    8.40
  -3  -3   1   65.19    7.90
  -4  -3  -1  333.87   25.10
  -4  -3  -1  262.97   24.50
  -4   3   1  238.68   25.70
  -4  -3  -1  333.87   24.40
  -4   3  -1  231.08   30.10
  -4  -3   1  261.97   24.40
  -4   3  -1  260.87   25.90
  -4  -3   1  323.67   25.10
  -5  -3  -1  194.88   18.40
  -5  -3  -1  230.98   18.50
   5   3  -1  203.98   19.40
  -5   3   1  163.98   20.50
  -5  -3  -1  215.98   19.70
  -5   3  -1  190.88   27.70
  -5   3  -1  165.18   20.60
  -5  -3   1  186.48   18.40
  -5  -3   1  218.78   19.80
  -5  -3   1  244.98   18.60
   5   3   1  222.98   19.70
  -6   3   1  113.19    9.80
  -6   3   1   77.59   13.60
  -6  -3  -1  119.99   11.30
  -6   3   1  119.49    9.00
  -6  -3  -1   96.79   12.60
  -6  -3   1  120.69   11.10
  -6   3  -1   74.89   13.90
  -6  -3   1   97.79   12.70
  -7   3   1   42.40    8.90
  -7  -3  -1   51.09    8.50
  -7   3  -1   35.50    8.40
  -7  -3   1   51.29    8.40
   0   4   1  959.00   74.39
   0   4   1  947.31   74.19
   0   4  -1  905.31   74.29
   0   4   1  872.01   74.29
   0   4  -1  955.50   74.49
   1   4  -1  157.28   11.80
  -1  -4  -1  133.19   13.30
  -1   4   1  137.39   11.10
   1   4  -1  133.79   11.30
  -1   4   1  124.39   11.10
  -1  -4   1  120.29   12.90
  -1   4  -1  124.59   11.10
   1   4   1  135.79   11.30
  -2   4   1  152.88   13.00
  -2   4   1  169.68   13.00
  -2  -4  -1  165.68   15.30
  -2   4  -1  152.28   13.00
  -2  -4   1  158.88   14.90
  -3  -4  -1  558.44   47.10
  -3   4   1  564.24   45.50
  -3  -4   1  583.74   47.10
  -4  -4  -1  696.73   55.59
  -4   4   1  690.23   54.49
  -4  -4  -1  578.54   55.69
  -4  -4  -1  710.23   55.89
   4   4  -1  710.53   56.29
  -4  -4   1  614.84   55.69
  -4  -4   1  710.53   55.89
  -5   4   1  355.86   28.40
  -5  -4  -1  332.97   30.20
  -5  -4  -1  363.56   29.70
  -5  -4  -1  300.47   29.60
   5   4  -1  359.16   30.70
  -5  -4   1  331.57   30.20
   5   4   1  359.76   30.70
  -5  -4   1  360.76   29.60
  -5  -4   1  321.17   29.70
  -6   4   1   49.50   10.90
  -6   4   1   69.49    6.60
  -6   4   1   79.39    5.80
  -6  -4  -1   66.09    8.50
  -6  -4  -1   53.39    9.20
  -6  -4   1   57.49    9.50
  -6  -4   1   60.99    8.10
  -7  -4  -1   56.29    8.90
  -7  -4   1   53.39    8.70
   0   5  -1  119.09   10.30
   0   5   1  118.99   10.10
   0   5  -1  116.79   10.10
  -1  -5  -1 1084.39   86.09
  -1   5   1 1010.60   84.59
   1   5  -1 1022.30   84.79
  -1   5   1 1089.49   84.59
   1   5  -1 1144.19   85.29
   1   5   1 1057.99   84.79
  -1   5  -1 1013.60   84.69
  -1  -5   1 1034.70   85.89
   2   5  -1 2810.92  204.68
  -2  -5  -1 2551.84  204.98
  -2   5   1 2439.96  203.48
  -2   5  -1 2473.65  203.48
  -2  -5   1 2478.35  204.88
   3   5  -1  314.17   24.10
  -3  -5  -1  274.07   24.60
  -3   5   1  267.57   22.90
  -3   5   1  277.37   22.20
  -3   5  -1  225.98   30.70
  -3   5  -1  260.77   22.20
  -3   5  -1  264.87   22.70
  -3  -5   1  282.27   24.40
  -4  -5  -1  282.57   24.40
  -4  -5  -1  278.47   24.40
  -4  -5  -1  276.67   25.30
   4   5  -1  296.57   25.00
  -4   5   1  264.57   23.40
  -4   5  -1  268.67   23.20
  -4  -5   1  273.27   25.00
  -4   5  -1  226.18   32.50
  -4  -5   1  302.27   24.50
  -4  -5   1  292.97   24.50
  -5  -5  -1  324.77   31.30
  -5   5   1  371.76   29.90
   5   5  -1  360.06   32.00
  -5  -5  -1  381.06   31.40
  -5  -5  -1  348.27   31.40
  -5  -5   1  341.77   31.40
  -5  -5   1  385.26   31.30
  -5   5  -1  374.36   29.60
  -5  -5   1  318.77   31.20
   5   5   1  371.46   32.10
  -6  -5  -1  123.39   14.70
  -6  -5  -1  154.08   14.60
  -6   5   1  140.29   12.30
  -6  -5   1  157.48   14.40
  -6  -5   1  130.89   14.90
  -7  -5  -1   42.90    7.30
  -7  -5   1   44.50    7.50
   0   6  -1  349.47   28.70
   0   6   1  352.96   28.70
   1   6  -1  211.18   18.50
   1   6  -1  229.08   18.90
  -1   6   1  220.38   18.30
  -1  -6  -1  205.58   20.50
  -1   6  -1  228.68   18.40
   1   6   1  222.38   18.50
   1   6   1  228.98   18.80
  -1  -6   1  199.48   20.30
  -2  -6  -1 1993.80  155.38
   2   6  -1 2004.10  154.68
  -2   6   1 1883.51  153.58
  -2   6  -1 1838.82  153.58
  -2  -6   1 1893.91  155.18
   3   6  -1   18.20    4.20
  -3  -6  -1   23.30    6.40
   3   6  -1   18.30    8.20
  -3   6   1   16.50    3.50
  -3   6  -1   17.20    3.30
   3   6   1   25.20    7.80
  -3  -6   1   15.60    5.50
  -4   6   1  117.29   11.90
  -4  -6  -1  128.89   12.90
  -4  -6  -1  122.89   14.70
   4   6  -1  133.19   13.20
   4   6   1  140.19   13.30
  -4   6  -1  122.79   11.60
  -4  -6   1  132.79   14.50
  -4  -6   1  121.09   12.50
  -4  -6   1  127.39   12.80
  -5   6   1  302.87   25.10
  -5  -6  -1  262.87   26.90
  -5  -6  -1  289.67   26.50
  -5  -6  -1  301.17   26.50
  -5   6  -1  295.07   24.80
  -5  -6   1  306.67   26.50
  -5  -6   1  287.07   27.00
  -5  -6   1  302.77   26.50
  -6  -6  -1  205.08   21.10
  -6  -6  -1  242.88   21.50
  -6   6   1  230.38   19.00
  -6  -6   1  204.28   21.10
  -6  -6   1  229.08   21.10
  -6   6  -1  235.78   18.60
  -7  -6  -1   85.49    9.20
  -7  -6  -1   71.89    9.70
  -7  -6   1   89.99    9.10
  -7  -6   1   71.59    9.80
   0   7  -1  398.56   32.90
   0   7   1  403.36   32.90
  -1  -7  -1  158.68   17.60
  -1   7   1  179.58   14.90
   1   7  -1  175.88   15.20
  -1   7  -1  172.88   14.90
  -1  -7   1  168.48   17.50
   1   7   1  181.28   15.10
  -2  -7  -1  708.93   58.59
  -2   7   1  713.83   56.39
  -2  -7  -1  686.03   56.79
   2   7  -1  589.24   59.09
   2   7  -1  736.33   57.59
  -2  -7   1  691.53   58.49
  -2   7  -1  814.22   59.39
   2   7   1  711.63   57.39
  -2  -7   1  734.93   56.79
   2   7   1  596.94   58.99
  -2   7  -1  661.63   56.29
  -3   7   1  254.67   24.00
   3   7  -1  259.07   27.80
   3   7  -1  291.17   24.90
  -3  -7  -1  300.37   26.50
  -3   7   1  277.87   23.00
   3   7   1  256.87   27.40
  -3   7  -1  297.97   23.10
  -3   7  -1  249.18   23.70
   3   7   1  291.57   24.80
  -3  -7   1  309.37   26.30
   4   7  -1   23.60    9.70
   4   7  -1   18.90    4.80
  -4  -7  -1   22.40    7.10
  -4   7   1   16.30    4.00
  -4   7  -1   16.90    3.70
   4   7   1   25.40    5.40
  -4  -7   1   29.30    7.20
   4   7   1   20.30    9.30
  -5  -7  -1  356.86   32.90
  -5   7   1  364.96   30.40
  -5  -7  -1  354.56   31.70
  -5  -7  -1  360.46   32.20
  -5  -7   1  369.26   32.10
  -5  -7   1  364.96   31.80
  -5   7  -1  366.16   30.20
  -5  -7   1  341.67   32.40
  -6   7   1  261.97   21.00
  -6  -7  -1  250.97   23.60
  -6  -7  -1  227.38   23.10
  -6  -7   1  241.88   23.30
  -6   7  -1  276.07   20.80
  -6  -7   1  242.88   23.30
  -7  -7  -1   23.00    5.30
  -7  -7  -1   20.00    4.40
  -7  -7   1   25.90    5.50
  -7  -7   1   24.10    4.40
   0   8   1   51.09    8.20
   0   8   1   40.10    5.30
   0  -8  -1   42.90    5.40
   0   8  -1   50.09    8.40
   0   8  -1   43.90    5.40
   0  -8   1   37.40    5.20
   1   8  -1  246.68   20.80
  -1  -8  -1  242.98   20.90
  -1   8   1  257.97   20.60
   1   8  -1  220.08   23.90
  -1  -8   1  240.48   20.80
   1   8   1  237.48   24.00
   1   8   1  231.38   20.70
  -1   8  -1  253.17   20.60
  -2   8   1   37.40    4.40
   2   8  -1   26.80    5.10
  -2  -8  -1   27.90    7.40
  -2  -8  -1   23.90    4.40
   2   8  -1   25.30    8.50
  -2   8  -1   39.10    8.00
  -2  -8   1   24.80    7.10
  -2   8  -1   27.80    3.90
   2   8   1   25.00    4.80
  -2  -8   1   25.40    4.40
   2   8   1   29.20    8.60
   3   8  -1  408.26   40.60
  -3  -8  -1  443.46   39.20
   3   8  -1  460.75   38.00
  -3   8   1  419.26   35.90
  -3   8  -1  444.16   36.00
  -3  -8   1  432.56   38.90
   3   8   1  420.36   40.40
   3   8   1  461.15   37.90
   4   8  -1  421.06   40.10
   4   8  -1  406.66   36.40
  -4   8   1  404.56   34.90
  -4  -8  -1  411.06   37.30
  -4   8  -1  407.46   34.60
  -4  -8   1  392.96   37.00
   4   8   1  448.16   40.60
   4   8   1  413.16   36.30
  -5   8   1  211.58   19.50
   5   8  -1  249.68   27.40
  -5  -8  -1  206.08   21.50
  -5  -8  -1  222.38   21.00
  -5  -8  -1  212.88   22.80
  -5  -8   1  227.38   22.60
   5   8   1  257.47   27.50
  -5  -8   1  220.98   21.50
  -5   8  -1  227.98   19.40
  -5  -8   1  230.78   21.20
  -6  -8  -1   63.99    9.90
  -6  -8  -1   64.69    9.20
  -6   8   1   70.59    6.80
  -6  -8   1   71.69    9.70
  -6   8  -1   78.19    6.50
  -6  -8   1   70.79    9.50
   0   9  -1   47.10    6.10
   0   9   1   46.90    8.40
   0  -9  -1   40.80    6.00
   0   9  -1   49.80    8.60
   0   9   1   49.90    6.00
   0  -9   1   40.20    5.80
   1   9  -1  971.20   75.79
   1  -9   1  858.81   75.49
   1   9  -1  928.01   78.39
  -1   9   1  997.10   75.59
  -1  -9  -1  912.61   75.89
  -1  -9   1  931.51   75.79
   1   9   1  945.01   75.69
  -1   9  -1  965.90   75.69
   1   9   1  950.30   78.29
   1  -9  -1  870.01   75.69
  -2  -9  -1  675.23   55.29
   2   9  -1  623.44   58.29
  -2   9   1  705.23   54.89
  -2  -9  -1  663.13   57.69
   2   9   1  666.33   58.39
  -2  -9   1  648.94   57.49
  -2   9  -1  688.73   54.89
  -2  -9   1  680.43   55.29
  -3  -9  -1    8.80    7.00
  -3   9   1   14.90    3.00
   3   9  -1   15.10    9.40
  -3  -9   1    7.10    6.60
   3   9   1   11.20    8.20
  -3   9  -1   11.60    3.00
  -3  -9   1   10.00    6.10
  -4  -9  -1  611.04   53.79
   4   9  -1  623.34   56.69
  -4  -9   1  587.94   53.49
   4   9   1  656.83   56.49
   5   9  -1   22.10   10.40
  -5   9   1   20.00    3.90
  -5  -9  -1   18.10    5.10
  -5  -9   1   18.40    5.30
   5   9   1   17.20    9.40
  -5   9  -1   16.20    3.40
  -6   9   1   19.30    2.80
  -6  -9  -1   16.50    5.40
  -6   9   1   26.30    2.70
   6   9  -1   14.30    9.00
  -6  -9  -1   18.00    5.20
  -6   9  -1   18.60    2.60
  -6  -9   1   18.20    5.30
  -6   9  -1   26.90    2.60
  -6  -9   1   18.90    5.30
   0 -10  -1   88.49    9.90
   0  10   1   97.89    9.90
   0  10  -1   93.69    9.90
   0  10  -1   92.89   13.00
   0 -10   1   86.29    9.80
   0  10   1  108.89   12.90
   1 -10   1   97.89   10.60
   1  10  -1  105.39   11.10
  -1 -10  -1  110.49   11.10
  -1  10   1  108.79   10.60
   1  10  -1  105.79   15.50
   1  10   1  112.79   11.00
  -1  10  -1   96.49   10.60
   1 -10  -1  101.79   10.80
  -1 -10   1  107.19   11.00
   1  10   1  102.09   15.10
  -2 -10  -1  138.59   14.10
  -2  10   1  144.19   13.50
  -2 -10  -1  158.18   23.50
   2  10  -1  137.89   19.60
   2  10   1  147.89   19.20
  -2  10  -1  159.48   13.80
  -2 -10   1  141.69   14.10
   3  10  -1  281.57   30.50
  -3  10   1  259.17   23.80
  -3 -10  -1  251.67   27.70
  -3 -10   1  253.27   27.70
  -3  10  -1  333.47   24.20
   3  10   1  275.17   29.80
   4  10  -1  249.28   27.60
  -4 -10  -1  222.88   23.80
  -4 -10   1  196.78   23.50
   4  10   1  254.17   27.40
  -5 -10  -1    8.10    4.50
  -5  10   1    2.70    3.80
   5  10  -1   10.80    8.80
  -5  10  -1    9.70    2.50
  -5 -10   1    7.20    4.50
   5  10   1   12.70    9.10
  -6 -10  -1   24.10    5.20
  -6 -10   1   26.40    5.40
   0  11   1    0.10    3.20
   0  11  -1    2.80    3.60
   0 -11  -1    2.80    3.50
   0 -11   1    0.30    3.00
  -1  11   1  333.17   29.70
   1 -11   1  346.97   29.90
   1  11  -1  334.87   30.10
   1  11  -1  362.56   33.20
  -1 -11  -1  358.96   30.30
  -1 -11   1  367.26   30.20
   1  11   1  356.16   33.00
   1 -11  -1  341.77   30.00
   1  11   1  338.77   30.00
  -1  11  -1  335.37   29.80
  -2 -11  -1  115.49   13.80
  -2  11   1  123.09   11.00
   2  11  -1  108.19   16.20
  -2 -11   1  127.89   14.00
   2  11   1  108.79   16.30
  -2  11  -1   84.39   10.60
  -2 -11   1   88.69   11.00
   3  11  -1  246.58   26.20
  -3 -11  -1  207.98   23.80
  -3  11  -1  209.98   19.50
   3  11   1  273.07   26.60
  -3 -11   1  201.18   23.80
   4  11  -1  684.63   64.79
  -4 -11  -1  768.12   61.29
   4  11   1  653.13   64.39
  -4 -11   1  787.52   61.49
   5  11  -1  118.19   17.30
  -5 -11  -1  126.09   13.40
   5  11   1  141.99   17.40
  -5 -11   1  133.59   13.60
   0  12  -1  117.59   13.10
   0 -12   1  119.69   12.90
   0  12   1  128.49   13.20
   0 -12  -1  163.78   16.10
   0 -12  -1  108.39   12.80
  -1  12   1  233.58   20.10
   1 -12   1  212.48   19.90
  -1 -12  -1  208.18   20.00
   1  12  -1  226.18   22.80
   1  12   1  231.18   22.50
   1 -12  -1  209.78   20.00
  -1  12  -1  218.38   20.00
  -1 -12   1  211.78   20.10
  -2 -12  -1  603.14   46.70
   2  12  -1  531.95   48.00
  -2  12   1  497.65   44.10
   2 -12   1  504.05   44.60
  -2 -12   1  627.34   46.70
   2 -12  -1  486.65   44.60
  -2  12  -1  497.45   44.20
   2  12   1  528.05   47.80
   3  12  -1  169.68   21.00
   3  12   1  171.38   20.60
  -4 -12  -1  399.06   33.90
   4  12  -1  366.46   36.80
   4  12   1  385.46   36.60
  -4 -12   1  402.96   34.00
  -5 -12  -1   89.29    9.70
  -5 -12   1   90.79    9.80
   0 -13  -1   43.50    9.00
   0 -13   1   38.80    8.50
  -1 -13  -1   72.09   11.10
   1 -13   1   59.59    8.90
   1 -13   1   93.39   12.60
   1 -13  -1   74.09   11.50
  -1 -13   1   92.79   12.10
  -2 -13  -1   99.19   12.80
   2 -13   1  104.19   14.00
   2 -13   1   80.09   10.40
   2  13  -1  105.69   13.70
   2  13   1   90.49   13.50
  -2 -13   1   93.99   12.90
   2 -13  -1  120.19   14.30
   3  13  -1  130.79   16.40
   3  13   1  131.49   16.00
   4  13  -1   99.59   12.70
  -4 -13  -1   95.89    9.90
  -4 -13   1   88.19    9.90
   4  13   1   83.89   12.60
   0 -14   1   31.10    7.40
   0 -14  -1   20.60    7.10
   1 -14   1   39.60    8.30
  -1 -14  -1   42.60    8.50
   1 -14  -1   37.30    8.40
  -1 -14   1   35.90    7.90
   2 -14   1    5.60    5.90
   2 -14  -1    2.60    6.10
  -2 -14   1    3.20    5.50
   0 -15   1   -0.50    4.90
   0 -15  -1    9.90    5.30
   1 -15   1   40.30    7.50
  -1 -15  -1   33.70    8.10
   1 -15  -1   39.20    7.50
  -1 -15   1   30.60    7.70
   0   0  -2 2043.40  162.98
  -2   0   2  385.16   28.50
  -2   0  -2  300.37   28.80
  -2   0   2  382.86   28.90
  -3   0   2  720.23   57.79
  -4   0   2   90.19    7.10
   4   0  -2   78.99    8.50
  -5   0   2   67.59    6.10
  -5   0  -2   73.99   10.10
  -5   0  -2   68.59    6.20
  -5   0   2   70.19    9.90
   5   0  -2   72.49    8.20
  -6   0   2    9.40    5.40
  -6   0  -2    8.20    5.30
  -6   0   2    7.10    2.00
  -6   0  -2    6.30    2.20
  -7   0   2  120.19   10.60
  -7   0   2  101.89   13.70
  -7   0  -2  105.49   14.00
  -7   0  -2  118.39   10.50
  -8   0   2    2.00    3.40
  -8   0  -2    1.60    3.70
   0   1  -2 1937.51  149.69
   0   1   2 1813.52  149.39
  -1   1   2  891.01   74.79
   1  -1  -2  983.70   74.99
  -2   1   2   86.09    7.20
  -2   1   2   97.79    7.40
  -2  -1   2   76.29    8.00
  -3  -1  -2  989.60   87.19
  -3  -1   2 1184.18   87.29
   4   1  -2  577.84   46.10
  -4  -1  -2  516.05   44.60
  -4  -1  -2  594.34   45.10
  -4  -1   2  520.35   45.00
   4  -1  -2  566.04   45.70
  -5  -1  -2  468.05   41.30
   5   1  -2  525.95   43.10
  -5   1   2  575.14   40.90
  -5  -1  -2  531.85   44.00
  -5  -1  -2  569.44   41.90
  -5   1   2  449.56   43.90
  -5   1  -2  454.85   49.70
  -5  -1   2  524.55   43.90
  -5   1  -2  483.25   44.20
  -5  -1   2  465.05   41.40
  -6  -1  -2  291.77   25.00
  -6   1   2  281.77   28.50
  -6  -1  -2  308.77   28.10
  -6   1  -2  303.97   24.40
  -6   1  -2  284.07   28.60
  -6  -1   2  301.57   28.10
  -7   1   2  187.18   14.10
  -7  -1  -2  148.89   17.40
  -7  -1  -2  165.58   14.70
  -7   1   2  140.99   17.40
  -7  -1   2  181.18   15.00
  -7  -1   2  155.98   17.50
  -7   1  -2  140.19   17.50
  -8   1   2    7.20    3.80
  -8  -1  -2    4.20    3.80
  -8   1  -2    3.00    3.60
  -8  -1   2    1.70    3.50
   0   2   2 4172.98  339.97
   0   2  -2 4367.16  340.27
  -1   2   2 3637.94  305.47
   1   2  -2 4115.99  305.97
   1   2   2 3756.22  305.47
  -2   2   2 2810.42  219.58
  -2   2   2 2498.55  219.48
  -2  -2  -2 2845.72  220.28
  -2  -2   2 2630.44  220.08
   2  -2  -2 2996.60  219.88
  -3   2   2  225.38   19.50
  -3  -2  -2  225.68   20.30
  -3  -2   2  226.98   20.10
   3  -2  -2  259.97   19.80
  -4  -2  -2   38.30    6.00
  -4  -2  -2   40.10    4.40
   4   2  -2   39.20    5.30
  -4  -2  -2   35.90    5.20
  -4   2   2   33.70    7.90
  -4  -2   2   31.80    5.00
  -4   2  -2   44.90   11.70
  -4   2  -2   33.40    7.80
  -5  -2  -2  154.78   15.60
  -5   2   2  122.39   16.10
  -5  -2  -2  163.18   13.90
   5   2  -2  153.68   15.00
  -5  -2   2  158.68   15.70
  -5   2  -2  141.39   23.50
  -5  -2   2  179.18   14.00
  -5  -2   2  149.39   13.60
  -5   2  -2  124.59   16.30
  -6  -2  -2   18.00    6.20
  -6  -2  -2   19.80    3.90
  -6   2   2   21.60    7.50
  -6  -2   2   23.50    3.90
  -6   2  -2   14.80    6.80
  -6  -2   2   17.50    6.00
  -7   2   2   43.40    8.80
  -7  -2  -2   51.39    8.50
  -7   2  -2   40.20    8.60
  -7  -2   2   59.09    9.20
  -8  -2  -2   31.50    5.80
  -8  -2   2   25.10    5.40
   0   3   2  677.13   55.49
   0   3  -2  709.43   55.89
  -1   3   2   24.90    2.50
   1   3  -2   29.00    3.20
  -1  -3  -2   30.20    5.10
  -1   3   2   25.50    2.50
  -1  -3   2   30.00    4.40
   1   3   2   23.00    2.30
  -1   3  -2   23.30    2.60
  -2   3   2 1078.39   91.59
  -2   3   2 1213.88   91.59
  -2  -3  -2 1236.68   92.69
  -2   3  -2 1114.89   91.59
  -2  -3   2 1101.79   92.39
  -3   3   2  564.44   48.20
  -3  -3  -2  632.54   49.60
  -3  -3   2  616.04   49.30
  -4   3   2  160.08   18.50
  -4  -3  -2  189.48   17.60
  -4  -3  -2  220.78   17.90
  -4  -3  -2  205.98   17.00
   4   3  -2  212.38   17.90
  -4  -3   2  180.38   17.30
  -4   3  -2  154.68   24.00
  -4  -3   2  224.48   17.90
  -4   3  -2  165.08   18.70
  -5  -3  -2  574.24   51.29
   5   3  -2  649.43   52.79
  -5  -3  -2  659.13   52.89
  -5  -3  -2  722.53   51.99
  -5  -3   2  616.84   51.39
  -5  -3   2  675.23   52.99
  -5   3  -2  563.64   59.89
  -5   3  -2  509.55   53.59
  -6   3   2   49.70    4.20
  -6   3   2   44.00    5.30
  -6   3   2   29.20    8.20
  -6  -3  -2   52.29    9.00
  -6  -3  -2   50.49    6.80
  -6   3  -2   25.40    8.00
  -6  -3   2   44.80    8.00
  -6  -3   2   56.39    6.40
  -7   3   2    5.80    5.20
  -7  -3  -2    6.50    4.40
  -7  -3   2    8.60    4.90
  -7   3  -2    6.50    5.40
   0   4   2 1527.45  119.49
   0   4  -2 1529.65  119.89
   0   4   2 1438.16  119.59
   0   4  -2 1494.45  119.59
  -1   4   2  789.92   66.99
  -1   4   2  830.12   66.89
  -1  -4  -2  873.01   68.39
   1   4  -2  924.41   67.59
   1   4  -2  837.52   67.19
   1   4   2  838.12   67.09
  -1   4  -2  826.82   66.99
  -1  -4   2  778.12   67.89
   2   4  -2 1017.10   71.89
  -2   4   2  859.81   70.69
  -2  -4  -2  917.51   72.19
  -2   4   2  878.91   70.69
  -2   4  -2  820.62   70.69
  -2  -4   2  811.62   71.79
  -3   4   2  104.49    9.40
  -3   4   2  107.99    9.30
   3   4  -2  132.89   11.10
  -3  -4  -2   97.29   12.00
  -3  -4   2  109.99   11.60
   4   4  -2  560.54   46.30
  -4   4   2  593.34   44.80
  -4  -4  -2  590.54   46.10
  -4  -4  -2  561.74   45.70
  -4  -4  -2  500.85   46.00
  -4  -4   2  591.54   46.10
  -4   4  -2  465.65   52.49
  -4  -4   2  499.25   45.80
  -5   4   2   34.90    4.60
  -5  -4  -2   26.20    5.50
  -5   4   2   22.10    7.10
  -5  -4  -2   35.70    5.60
   5   4  -2   38.90    6.30
  -5   4  -2   22.30    6.90
  -5   4  -2   33.40   13.50
   5   4   2   39.40    6.40
  -5  -4   2   30.90    6.10
  -5  -4   2   39.50    5.50
  -5  -4   2   37.00    6.30
  -6  -4  -2   92.49   10.20
  -6   4   2   85.99    8.30
  -6  -4  -2   77.79   10.90
  -6  -4   2   96.29    9.80
  -6  -4   2   75.49   10.90
  -7  -4  -2   88.39   10.70
  -7  -4   2   82.49   10.90
   0   5   2  983.30   74.99
   0   5  -2  972.80   75.29
   0   5  -2  908.91   75.49
   0  -5  -2  882.51   76.79
   0   5   2  931.01   75.19
  -1   5   2  353.46   29.10
   1   5  -2  378.46   29.80
  -1  -5  -2  350.96   31.00
   1   5  -2  359.56   29.30
  -1   5   2  374.36   29.00
  -1   5  -2  358.86   29.10
  -1  -5   2  321.57   30.50
   1   5   2  360.66   29.20
  -2   5   2  192.88   16.10
  -2  -5  -2  207.68   18.80
   2   5  -2  215.28   17.30
  -2   5   2  186.78   16.10
  -2  -5   2  193.38   18.30
  -2   5  -2  184.88   16.10
   3   5  -2   52.29    6.20
  -3   5   2   39.20    5.50
  -3  -5  -2   45.10    7.60
  -3   5   2   51.39    4.60
  -3   5  -2   34.90   13.00
  -3   5  -2   55.49    7.20
  -3  -5   2   48.40    7.20
  -3   5  -2   54.89    4.60
  -3   5  -2   45.80    5.10
  -4  -5  -2  175.48   17.80
   4   5  -2  177.68   17.20
  -4  -5  -2  179.88   16.80
  -4  -5  -2  180.48   16.70
  -4   5   2  179.88   15.90
  -4  -5   2  215.28   17.10
  -4  -5   2  184.78   16.80
  -4   5  -2  181.28   15.50
  -4  -5   2  163.38   17.40
  -4   5  -2  165.38   26.30
   5   5  -2  104.09   11.70
  -5   5   2   71.29   13.00
  -5  -5  -2   88.39   12.10
  -5  -5  -2  109.39   11.30
  -5   5   2  106.79   10.00
  -5  -5  -2  100.29   11.40
  -5   5  -2  109.49    9.30
  -5  -5   2  111.79   11.00
  -5  -5   2  100.19   11.30
  -5  -5   2   99.89   12.00
   5   5   2  104.29   11.80
  -6  -5  -2   23.10    5.80
  -6   5   2   25.00    3.70
  -6  -5  -2   34.80    6.00
  -6  -5   2   21.60    4.90
  -6  -5   2   16.50    5.00
  -6  -5   2   29.00    6.40
  -7  -5  -2   21.70    5.60
  -7  -5   2   24.80    6.00
   0   6  -2  399.96   31.90
   0   6   2  380.06   31.80
  -1   6   2  423.86   34.70
  -1   6   2  421.56   34.50
  -1  -6  -2  445.86   36.90
   1   6  -2  456.55   35.50
   1   6  -2  412.06   34.90
  -1   6  -2  421.16   34.80
   1   6   2  427.76   34.90
  -1  -6   2  411.46   36.40
   2   6  -2  217.48   18.60
  -2  -6  -2  206.58   20.40
  -2   6   2  214.78   17.50
  -2   6  -2  206.88   17.50
  -2  -6   2  196.08   19.90
  -3  -6  -2  224.38   19.90
   3   6  -2  229.08   18.50
  -3   6   2  190.28   17.40
   3   6  -2  161.78   21.00
  -3   6   2  196.48   16.40
  -3   6  -2  185.78   17.00
   3   6   2  194.88   21.20
  -3   6  -2  194.78   16.40
  -3  -6   2  196.38   19.20
  -4  -6  -2   41.20    8.10
  -4   6   2   43.70    5.80
   4   6  -2   41.90    6.40
  -4  -6  -2   37.30    6.40
  -4  -6   2   37.40    5.90
   4   6   2   38.50    6.20
  -4   6  -2   39.70    5.00
  -4  -6   2   42.40    7.60
  -4  -6   2   39.50    6.20
  -5  -6  -2   93.39   12.10
  -5  -6  -2   85.09   10.50
  -5  -6  -2   87.19   10.60
  -5   6   2   90.99    9.20
  -5  -6   2   93.29   10.60
  -5  -6   2   88.69   10.30
  -5  -6   2   94.29   11.80
  -5   6  -2   90.69    8.60
  -6   6   2  306.77   24.20
  -6  -6  -2  260.07   26.10
  -6  -6  -2  307.57   26.70
  -6  -6   2  256.87   26.20
  -6   6  -2  309.37   23.50
  -6  -6   2  285.67   26.00
  -7  -6  -2   26.70    5.80
  -7  -6  -2   31.20    4.90
  -7  -6   2   27.30    4.60
  -7  -6   2   24.10    5.80
   0   7   2 2814.92  225.88
   0   7  -2 2838.12  225.88
   1   7  -2  590.74   48.30
  -1  -7  -2  576.64   50.09
  -1   7   2  609.14   48.10
  -1   7  -2  616.34   48.20
  -1  -7   2  555.74   49.80
   1   7   2  596.34   48.20
   2   7  -2  125.59   12.00
   2   7  -2   96.29   15.60
  -2  -7  -2  117.99   14.60
  -2   7   2  137.39   10.90
  -2  -7  -2  118.79   11.50
  -2   7  -2  114.39   10.80
  -2  -7   2  124.89   11.40
  -2   7  -2  129.89   14.50
  -2  -7   2  123.59   14.30
   2   7   2  127.39   11.80
   2   7   2  123.29   15.40
  -3  -7  -2  451.15   38.00
   3   7  -2  379.66   39.40
   3   7  -2  454.55   36.80
  -3   7   2  431.96   34.80
   3   7   2  430.46   39.00
  -3   7  -2  409.46   35.50
  -3   7  -2  390.96   34.70
   3   7   2  450.65   36.60
  -3  -7   2  437.06   37.50
   4   7  -2   30.60    6.40
  -4  -7  -2   30.20    7.90
  -4   7   2   25.60    4.90
   4   7  -2   33.60   10.80
   4   7   2   35.60   10.50
  -4  -7   2   33.10    7.70
   4   7   2   27.80    5.70
  -4   7  -2   29.50    4.60
  -5   7   2  176.58   16.40
  -5  -7  -2  164.98   17.40
  -5  -7  -2  175.38   18.00
  -5  -7  -2  182.88   19.30
  -5  -7   2  190.38   19.00
  -5   7  -2  187.78   15.80
  -5  -7   2  181.18   17.70
  -5  -7   2  188.98   17.70
  -6   7   2   36.10    4.60
  -6  -7  -2   28.70    6.30
  -6  -7  -2   38.70    7.20
  -6  -7   2   36.60    6.60
  -6   7  -2   36.30    3.70
  -6  -7   2   43.00    7.40
  -7  -7  -2   26.20    5.60
  -7  -7  -2   26.40    4.60
  -7  -7   2   18.80    4.10
  -7  -7   2   26.50    5.70
   0  -8   2  574.04   48.40
   0   8  -2  639.24   48.50
   0  -8  -2  564.74   48.50
   0   8   2  568.94   50.09
   0   8  -2  573.74   50.39
   0   8   2  633.34   48.40
   1   8  -2  196.58   20.80
   1   8  -2  186.18   16.70
  -1   8   2  196.28   16.50
  -1  -8  -2  190.28   16.90
   1   8   2  199.58   20.30
  -1   8  -2  199.38   16.60
   1   8   2  193.18   16.70
   1  -8  -2  174.18   18.20
  -1  -8   2  187.38   16.70
   2   8  -2   88.59   14.00
  -2  -8  -2  110.39   14.20
  -2  -8  -2   97.79   10.30
  -2   8   2  106.69    9.70
   2   8  -2   99.49   10.80
  -2   8  -2  110.39    9.80
   2   8   2   97.19   14.60
  -2  -8   2  102.59   13.60
  -2  -8   2  107.79   10.30
  -2   8  -2  124.99   14.20
   3   8  -2   78.29    9.60
  -3  -8  -2   84.19   12.10
   3   8  -2   74.39   13.80
  -3  -8   2   98.69   12.50
  -3  -8   2   84.89   11.20
   3   8   2   82.09   13.50
   3   8   2   78.89    9.40
  -3  -8   2   79.89    9.60
  -4  -8  -2   41.50    9.40
   4   8  -2   35.50    9.20
   4   8  -2   39.00   11.50
   4   8   2   29.00    6.80
   4   8   2   55.49   11.70
  -4  -8   2   43.10    8.90
  -4   8  -2   36.40    5.30
   5   8  -2   36.40   11.80
  -5  -8  -2   17.00    5.10
  -5  -8  -2   34.20    8.30
  -5   8   2   19.70    4.30
  -5  -8  -2   20.50    6.00
  -5  -8   2   22.60    5.80
  -5  -8   2   24.60    5.90
   5   8   2   50.09   11.60
  -5  -8   2   34.50    7.90
  -5   8  -2   20.90    3.70
  -6   8   2   87.49    7.80
  -6  -8  -2   78.89   10.10
  -6  -8  -2   86.29   11.20
  -6  -8   2   82.79   10.50
  -6  -8   2   79.09   10.30
   0   9  -2   43.20    5.50
   0  -9   2   32.30    4.90
   0   9   2   45.00    7.90
   0  -9  -2   32.80    5.30
   0   9   2   32.00    4.80
   0   9  -2   45.70    8.40
   1   9  -2   10.00    6.90
  -1  -9  -2   12.20    3.50
   1  -9   2   11.50    3.20
  -1   9   2   14.40    3.20
   1   9  -2   15.20    3.60
   1   9   2   16.20    3.50
   1   9   2   10.70    6.40
  -1  -9   2   12.40    3.20
   1  -9  -2   15.20    3.50
  -1   9  -2   15.70    3.30
  -2   9   2  323.07   26.90
  -2  -9  -2  287.67   27.30
   2   9  -2  300.77   31.20
  -2  -9  -2  327.87   30.40
   2   9   2  306.87   30.70
  -2  -9   2  331.87   30.30
  -2   9  -2  401.06   31.90
  -2  -9   2  322.37   27.40
  -2   9  -2  301.37   26.80
  -3   9   2   59.09    6.70
   3   9  -2   57.09   12.90
  -3  -9  -2   52.99   10.60
   3   9   2   59.49   12.10
  -3  -9   2   66.29    9.70
  -3  -9   2   69.29   11.10
   4   9  -2  228.08   25.80
  -4  -9  -2  188.28   21.90
   4   9   2  217.48   25.30
  -4  -9   2  188.88   21.50
  -5   9   2   72.89    8.30
  -5  -9  -2   85.29   10.10
   5   9  -2   85.39   15.50
  -5  -9  -2   59.69   11.80
   5   9   2   87.09   14.90
  -5  -9   2   83.49   10.40
  -5   9  -2   73.49    7.70
  -6   9   2   32.20    3.00
   6   9  -2   34.10    9.60
  -6  -9  -2   21.80    5.50
  -6   9   2   19.90    3.10
  -6  -9  -2   19.00    5.80
  -6   9  -2   24.30    2.80
  -6  -9   2   23.20    5.70
  -6  -9   2   23.50    5.80
  -6   9  -2   31.30    2.90
   0 -10  -2   28.90    5.30
   0  10  -2   41.60    9.60
   0  10   2   42.80    8.00
   0  10  -2   33.90    5.60
   0 -10   2   31.40    5.10
   0  10   2   33.80    5.40
   1  10  -2   27.30    5.10
   1  10  -2   27.50    8.50
   1 -10   2   26.70    4.70
  -1 -10  -2   25.10    5.20
  -1  10   2   22.80    4.60
   1  10   2   26.10    8.10
   1 -10  -2   26.30    5.00
  -1 -10   2   30.30    5.00
  -1  10  -2   24.80    4.80
   1  10   2   34.00    5.20
  -2 -10  -2  321.67   34.40
  -2  10   2  320.37   28.50
   2  10  -2  339.97   33.90
  -2 -10   2  358.76   29.20
   2  10   2  348.67   33.40
  -2  10  -2  333.87   28.60
  -3  10   2  652.63   53.19
   3  10  -2  664.83   58.79
  -3 -10  -2  607.74   56.39
  -3  10  -2  690.63   53.39
   3  10   2  681.43   58.29
  -3 -10   2  591.44   56.19
   4  10  -2   30.80   11.40
  -4 -10  -2   29.00    8.80
  -4 -10   2   13.80    7.90
   4  10   2   24.00   10.20
   5  10  -2    8.80    9.00
  -5 -10  -2    5.40    4.30
   5  10   2    2.90    7.60
  -5 -10   2    6.80    4.50
  -5  10  -2    6.20    2.10
  -6 -10  -2   51.29    7.30
  -6 -10   2   51.89    7.50
   0 -11  -2  299.87   26.70
   0  11  -2  306.07   26.60
   0 -11   2  310.87   26.60
   0  11   2  296.87   26.50
   1  11  -2   76.29   10.00
   1 -11   2   81.39    9.40
  -1 -11  -2   81.99    9.80
  -1 -11  -2  111.29   13.00
   1  11  -2   84.59   13.10
  -1  11   2   82.69    9.30
   1  11   2   86.59   12.90
   1 -11  -2   77.39    9.60
  -1 -11   2   78.99    9.60
   1  11   2   73.39    9.70
  -1  11  -2   75.59    9.40
   2  11  -2   35.80   10.80
  -2  11   2   40.10    5.80
  -2 -11  -2   46.30    8.60
   2  11   2   33.60   10.10
   2 -11  -2   49.20   13.10
   2 -11  -2   36.90    8.70
  -2 -11   2   45.70    8.50
  -2 -11   2   37.30    6.20
  -3 -11  -2  154.88   18.80
   3  11  -2  155.78   21.60
  -3  11   2  171.28   13.90
   3  11   2  170.98   20.80
  -3  11  -2  126.99   13.70
  -3 -11   2  127.29   17.90
   4  11  -2   68.49   13.30
  -4 -11  -2   55.79    8.40
   4  11   2   57.29   12.30
  -4 -11   2   62.39    9.30
   5  11  -2  117.79   17.30
  -5 -11  -2  125.29   12.80
   5  11   2  113.19   16.10
  -5 -11   2  120.29   12.90
   0 -12   2  101.69   11.40
   0 -12  -2  136.29   14.80
   0 -12  -2   98.49   11.50
   0  12  -2   99.09   11.80
   0  12   2  100.49   11.80
   1  12  -2  170.88   18.40
  -1  12   2  152.68   15.00
   1 -12   2  145.09   14.90
  -1 -12  -2  202.48   18.40
   1  12   2  154.68   17.90
  -1 -12   2  141.39   15.10
  -1  12  -2  149.19   15.20
   1 -12  -2  130.59   15.00
   1 -12  -2  193.28   18.20
   2 -12   2  197.38   19.80
   2  12  -2  200.28   24.00
  -2  12   2  237.58   19.60
  -2 -12  -2  214.88   21.90
   2 -12  -2  262.67   23.10
  -2 -12   2  241.98   22.00
  -2  12  -2  176.88   19.50
   2  12   2  209.68   23.10
   3  12  -2   39.30   11.10
   3  12   2   46.20   10.30
   4  12  -2    7.00    8.20
  -4 -12  -2    8.80    4.20
  -4 -12   2    3.40    4.10
   4  12   2   12.20    7.20
  -5 -12  -2    2.40    3.20
   0 -13   2  194.08   21.40
   0 -13  -2  267.37   24.30
   0 -13   2  290.77   24.30
  -1 -13  -2  262.17   24.10
   1 -13   2  211.18   21.30
   1 -13  -2  261.17   24.30
  -1 -13   2  199.98   21.20
  -1 -13   2  299.37   24.20
  -2 -13  -2   31.50    7.50
   2  13  -2   30.20    8.10
   2 -13   2   31.40    8.30
   2 -13   2   26.20    5.50
   2  13   2   30.10    7.70
   2 -13  -2   38.50    8.70
  -2 -13   2   27.60    7.20
   3  13  -2  110.79   14.50
   3  13   2   86.19   13.10
  -4 -13  -2   73.49    8.00
   4  13  -2   58.69   10.10
  -4 -13   2   65.19    8.10
   4  13   2   59.59    9.60
   0 -14   2    6.30    5.60
   0 -14  -2    2.60    5.80
   1 -14   2    2.60    5.70
  -1 -14  -2    7.10    5.60
   1 -14  -2    2.40    5.50
  -1 -14   2    1.10    5.10
   2 -14   2   26.50    7.40
   2 -14  -2   24.40    7.50
  -2 -14   2   17.30    6.40
  -3 -14   2  407.16   34.20
   0 -15   2   17.00    5.80
   0 -15  -2   10.00    5.50
   1 -15   2  108.59   12.50
   1 -15  -2  106.09   12.70
  -1 -15   2   84.19   12.30
   0   0  -3   -6.10    0.90
   1   0  -3 3107.89  247.98
  -2   0   3  711.53   54.59
  -2   0   3  651.03   54.29
  -3   0   3   -1.20    1.70
   3   0  -3    0.40    1.30
  -4   0   3  214.68   16.10
  -4   0   3  187.38   16.40
   4   0  -3  191.98   17.40
  -4   0  -3  193.68   16.70
  -5   0   3  141.39   12.30
  -5   0  -3  157.58   16.00
  -5   0   3  153.98   15.80
   5   0  -3  143.39   14.20
  -5   0  -3  150.98   12.50
  -6   0  -3   14.40    5.80
  -6   0  -3   16.90    3.10
  -6   0   3   16.60    6.20
  -7   0   3  264.57   28.30
  -7   0  -3  332.37   25.60
  -7   0   3  330.77   25.70
  -7   0  -3  279.17   28.60
  -8   0   3    7.80    3.90
  -8   0  -3    9.90    4.40
   0   1   3 1403.36  110.19
   0   1  -3 1361.96  110.49
   1   1  -3 4773.12  349.17
  -1   1   3 4022.30  348.77
   1   1   3 4204.08  348.67
   1  -1  -3 4515.65  348.97
  -2   1   3  952.80   79.29
  -2   1   3 1089.69   79.39
  -2  -1  -3  875.31   79.79
   2  -1  -3 1130.29   79.79
  -2  -1   3  907.71   79.69
  -3   1   3  403.86   31.50
   3  -1  -3  408.66   32.20
  -3  -1   3  357.36   31.90
  -4  -1  -3  676.73   64.69
  -4  -1  -3  768.32   64.49
   4   1  -3  855.91   65.89
  -4  -1  -3  874.81   64.99
  -4  -1   3  807.82   64.89
   4  -1  -3  835.52   65.49
  -5  -1  -3  129.79   13.00
   5   1  -3  150.68   14.70
  -5  -1  -3  150.78   15.60
  -5   1   3  167.18   12.50
  -5  -1  -3  157.48   13.60
  -5   1   3  152.88   16.20
  -5  -1   3  150.78   15.70
  -5   1  -3  136.69   16.00
  -5   1  -3  151.18   12.30
  -6  -1  -3    9.30    2.90
  -6   1   3    9.20    1.90
  -6   1   3   10.70    5.70
  -6  -1  -3   11.50    5.80
  -6   1  -3   10.30    2.20
  -6   1  -3   10.90    5.90
  -6  -1   3   10.50    5.30
  -7   1   3   23.60    7.30
  -7  -1  -3   21.90    6.60
  -7  -1  -3   25.90    4.20
  -7   1   3   23.80    3.40
  -7  -1   3   22.20    6.70
  -7   1  -3   26.80    7.40
  -8  -1  -3   24.80    5.30
  -8   1   3   21.00    5.00
  -8  -1   3   19.80    4.90
  -8   1  -3   22.60    5.10
   0   2   3 1926.01  159.98
   0   2  -3 2091.19  160.48
   1   2  -3 4513.95  338.97
  -1  -2  -3 4394.26  339.37
  -1   2   3 4024.10  338.47
   1   2   3 4072.79  338.37
  -2  -2  -3 1795.12  139.39
  -2   2   3 1602.04  138.49
   2   2  -3 2002.70  139.39
  -2   2   3 1690.73  138.49
   2  -2  -3 1755.12  138.79
  -2  -2   3 1578.64  138.99
  -3   2   3  232.98   18.60
  -3  -2  -3  217.98   19.90
  -3   2   3  234.78   18.70
  -3  -2   3  231.38   19.60
   4   2  -3  107.19   10.20
  -4  -2  -3   84.39   10.00
  -4  -2  -3  106.39   10.60
  -4   2   3   85.19   11.20
  -4  -2  -3  108.49    9.40
  -4   2  -3  102.39   11.90
  -4  -2   3   91.79    9.80
  -4   2  -3  111.39   19.10
  -5   2   3  608.44   59.69
   5   2  -3  727.63   58.99
  -5  -2  -3  782.72   58.09
  -5  -2  -3  766.12   59.59
  -5  -2   3  696.43   57.29
  -5   2  -3  648.54   60.09
  -5   2  -3  628.44   65.99
  -5  -2   3  759.92   59.59
  -6  -2  -3  232.18   22.30
  -6   2   3  179.08   22.50
  -6  -2  -3  236.08   20.10
  -6  -2   3  263.47   19.90
  -6  -2   3  228.88   22.40
  -6   2  -3  191.08   23.00
  -7   2   3   91.19    7.60
  -7  -2  -3   67.79   10.80
  -7   2   3   54.69   10.60
  -7   2   3   92.79    7.20
  -7   2  -3   58.99   11.00
  -7  -2   3   74.19   10.80
  -8  -2  -3   63.49    8.00
  -8  -2   3   57.09    9.10
   0   3  -3   36.60    4.00
   0   3   3   33.10    3.40
   0   3  -3   33.80    3.60
   0   3   3   34.30    3.20
  -1  -3  -3 1124.69   87.39
   1   3  -3 1215.58   86.89
  -1   3   3 1099.39   86.19
  -1   3   3  974.20   86.29
  -1  -3   3  967.60   86.89
   1   3   3 1132.49   86.19
  -1   3  -3 1046.30   86.29
  -2   3   3  787.22   60.29
  -2   3   3  703.43   60.29
  -2  -3  -3  820.62   61.59
  -2   3  -3  733.73   60.29
  -2  -3   3  735.83   61.19
  -3   3   3 1220.58  103.69
  -3   3   3 1307.37  103.79
  -3  -3  -3 1356.16  104.99
  -3  -3   3 1323.97  104.79
   4   3  -3  797.62   60.99
  -4  -3  -3  667.63   60.19
  -4  -3  -3  790.62   60.19
  -4  -3  -3  827.62   60.89
  -4   3  -3  645.14   66.49
  -4   3  -3  626.54   61.49
  -4  -3   3  684.73   60.09
  -4  -3   3  813.62   60.89
  -5  -3  -3   32.00    5.60
   5   3  -3   43.50    6.30
  -5   3   3   23.80    6.90
  -5  -3  -3   31.80    6.50
  -5  -3  -3   40.10    5.60
  -5  -3   3   41.40    5.90
  -5  -3   3   50.19    5.70
  -5   3  -3   29.30    7.60
  -5   3  -3   31.20   13.00
  -5  -3   3   39.50    6.70
  -6  -3  -3  224.08   19.40
  -6   3   3  196.08   18.00
  -6  -3  -3  193.28   20.40
  -6   3   3  225.68   17.20
  -6  -3   3  175.88   20.30
  -6  -3   3  224.48   18.80
  -7  -3  -3  143.39   14.20
  -7   3   3   97.69   14.30
  -7   3  -3   93.79   14.50
  -7  -3   3  146.89   14.20
   0   4  -3 1587.64  125.49
   0   4   3 1504.55  124.99
   0   4   3 1572.54  124.89
   0   4  -3 1597.14  125.09
  -1   4   3   49.60    4.40
  -1   4   3   45.70    4.50
  -1  -4  -3   64.09    8.00
   1   4  -3   47.30    5.00
   1   4  -3   53.89    5.30
  -1  -4   3   48.40    6.40
   1   4   3   47.00    4.70
   1   4   3   49.60    4.30
  -1   4  -3   45.50    4.60
  -2   4   3 1560.54  126.39
   2   4  -3 1778.12  127.49
  -2   4   3 1495.25  126.39
  -2  -4  -3 1700.33  127.89
  -2   4  -3 1483.75  126.39
  -2  -4   3 1490.85  127.39
  -3   4   3  463.25   39.80
  -3   4   3  496.25   39.90
   3   4  -3  571.74   41.60
  -3  -4  -3  501.25   41.70
  -3  -4   3  479.95   41.20
  -3   4  -3  470.15   39.90
  -4  -4  -3   54.99    6.90
  -4  -4  -3   57.89    8.40
   4   4  -3   59.79    7.40
  -4  -4  -3   69.09    7.40
  -4   4   3   51.49    9.20
  -4   4   3   62.49    6.30
  -4  -4   3   74.69    7.50
  -4   4  -3   64.39   16.00
  -4  -4   3   60.09    7.40
  -4  -4   3   55.39    7.70
  -4   4  -3   45.70    9.30
  -5  -4  -3  412.46   40.40
  -5  -4  -3  528.35   41.00
   5   4  -3  486.95   41.50
  -5  -4  -3  500.15   41.30
  -5   4   3  520.25   39.80
  -5  -4   3  447.46   40.30
  -5  -4   3  507.55   41.30
  -5   4  -3  404.56   49.80
  -6   4   3   41.40    5.40
  -6   4   3   51.59    4.10
  -6  -4  -3   51.69    7.40
  -6  -4  -3   39.50    7.70
  -6   4   3   22.60    7.60
  -6  -4   3   30.50    7.00
  -6   4  -3   35.30   18.80
  -6   4  -3   30.90    8.70
  -6  -4   3   46.20    6.50
  -7  -4  -3   88.89   11.00
  -7  -4   3   92.09   11.30
   0  -5  -3 1439.36  110.89
   0   5   3 1410.56  109.39
   0   5   3 1337.37  109.49
   0   5  -3 1316.17  109.99
   0   5  -3 1352.96  109.59
  -1   5   3 1107.49   88.89
   1   5  -3 1199.38   89.69
   1   5  -3 1094.39   89.19
  -1  -5  -3 1147.69   90.49
  -1   5   3 1077.09   88.99
   1   5   3 1118.09   89.09
  -1   5  -3 1107.19   88.99
  -1  -5   3 1034.20   89.99
  -2   5   3  587.14   49.60
  -2  -5  -3  651.73   51.59
  -2   5   3  616.84   49.50
   2   5  -3  669.03   50.79
  -2  -5   3  588.44   50.99
  -2   5  -3  588.14   49.60
  -3  -5  -3  505.95   40.40
  -3   5   3  426.26   38.00
  -3   5   3  448.96   37.90
  -3   5   3  477.65   38.80
   3   5  -3  528.85   39.80
  -3  -5   3  467.05   39.70
  -3   5  -3  460.95   38.30
  -3   5  -3  539.65   39.80
  -3   5  -3  437.96   46.80
  -3   5  -3  424.06   37.90
   4   5  -3   36.50    5.70
  -4   5   3   35.80    4.90
  -4  -5  -3   36.40    7.00
  -4   5   3   17.50    6.30
  -4  -5  -3   33.10    5.30
  -4  -5  -3   31.40    5.50
  -4   5  -3   23.50   13.10
  -4   5  -3   29.90    3.90
  -4  -5   3   33.00    6.20
  -4  -5   3   36.80    5.60
  -4  -5   3   40.10    5.60
  -5   5   3    6.10    5.10
  -5  -5  -3   11.30    3.90
  -5  -5  -3    9.40    3.90
  -5   5   3    9.70    3.10
  -5   5   3   19.80    2.50
   5   5  -3   11.60    4.30
  -5  -5  -3    6.80    5.10
  -5   5  -3   13.30    2.30
   5   5   3   12.80    4.40
  -5   5  -3    7.80    5.80
  -5  -5   3   10.70    3.50
  -5  -5   3    9.70    4.30
  -5   5  -3   16.00   12.90
  -5  -5   3   11.00    5.00
  -6  -5  -3  223.28   20.10
  -6   5   3  211.28   18.00
  -6  -5  -3  181.98   19.90
  -6  -5   3  226.68   19.40
  -6  -5   3  195.28   20.00
  -7  -5  -3   43.70    7.70
  -7  -5   3   49.00    8.10
  -7  -5   3   59.39    6.60
   0   6  -3 3313.17  269.87
   0   6   3 3343.47  269.87
   0   6   3 3488.45  269.57
  -1   6   3   55.89    5.50
   1   6  -3   51.09    5.90
  -1  -6  -3   75.39    9.30
  -1   6   3   54.99    5.20
   1   6  -3   59.89    6.30
  -1   6  -3   53.99    5.60
   1   6   3   56.89    5.70
  -1  -6   3   69.59    8.80
  -2  -6  -3   84.19   10.90
  -2   6   3   79.59    7.20
  -2   6   3   85.29    7.10
   2   6  -3   81.59    8.40
  -2   6  -3   75.89    7.30
  -2  -6   3   68.99    9.60
   3   6  -3  176.08   15.40
  -3   6   3  146.29   14.50
   3   6  -3  142.39   19.10
  -3   6   3  164.28   13.40
  -3  -6  -3  168.88   17.20
   3   6   3  155.08   18.60
  -3   6  -3  148.49   13.90
  -3  -6   3  165.98   16.20
  -3   6  -3  191.68   16.30
  -3   6  -3  140.29   13.40
  -4  -6  -3  119.89   13.20
  -4   6   3  121.49   12.40
  -4  -6  -3  126.29   15.10
   4   6  -3  139.19   13.70
  -4  -6   3  143.09   13.10
  -4   6  -3  126.99   11.70
  -4  -6   3  135.09   14.50
  -5  -6  -3   18.00    4.90
  -5  -6  -3   22.40    5.10
  -5   6   3   26.30    4.50
  -5  -6  -3   17.80    6.80
  -5  -6   3   22.40    4.90
  -5  -6   3   23.40    6.30
  -5  -6   3   29.30    6.00
  -5   6  -3   19.90    3.20
  -6  -6  -3   59.69    8.90
  -6   6   3   68.09    6.90
  -6  -6  -3   64.59    9.30
  -6  -6   3   59.99    8.30
  -6  -6   3   57.59    9.20
  -7  -6  -3   28.70    6.10
  -7  -6   3   32.60    5.30
  -7  -6   3   25.80    6.00
   0   7  -3  463.45   37.20
   0   7   3  444.36   37.00
   1   7  -3  738.63   59.09
  -1  -7  -3  694.13   59.89
  -1   7   3  742.43   57.89
   1   7  -3  680.03   58.09
  -1   7  -3  726.83   57.99
  -1  -7   3  725.83   59.69
   1   7   3  700.73   57.99
  -2  -7  -3  462.45   41.30
  -2   7   3  523.55   38.80
  -2  -7  -3  462.65   39.20
   2   7  -3  491.95   40.10
   2   7  -3  383.86   41.90
  -2  -7   3  515.85   39.20
  -2   7  -3  501.95   38.80
  -2   7  -3  471.95   41.40
   2   7   3  431.56   41.60
  -2  -7   3  457.15   40.80
  -3  -7  -3   21.40    7.00
   3   7  -3   20.50    4.80
   3   7  -3   12.70    8.30
  -3   7  -3   14.90    2.80
  -3   7  -3   25.10    5.90
  -3  -7   3   18.90    6.10
   3   7   3   25.20    8.00
  -3   7  -3   13.10    3.30
   4   7  -3    1.30    2.80
  -4   7   3    4.60    3.10
  -4  -7  -3    0.20    5.90
   4   7  -3    0.30    9.00
  -4  -7   3    5.50    3.30
  -4   7  -3    3.30    2.40
   4   7   3    7.30    7.70
   4   7   3    1.50    2.70
  -4  -7   3    0.80    5.30
  -5  -7  -3   47.30    8.20
  -5  -7  -3   46.80    7.80
  -5   7   3   46.70    6.70
  -5  -7  -3   63.79   10.20
  -5  -7   3   47.70    7.70
  -5   7  -3   49.00    5.60
  -5  -7   3   55.99    9.10
  -5  -7   3   50.59    7.70
  -6  -7  -3   68.89    9.90
  -6   7   3   72.59    7.70
  -6  -7  -3   73.89   10.60
  -6  -7   3   72.29   10.20
  -6  -7   3   77.29    9.70
  -6   7  -3   88.89    6.80
  -7  -7  -3   52.59    7.00
  -7  -7  -3   49.70    7.50
  -7  -7   3   47.70    7.50
  -7  -7   3   52.19    6.60
   0   8  -3  599.04   45.90
   0   8   3  568.04   47.50
   0  -8  -3  525.95   45.90
   0   8   3  595.54   45.70
   0  -8   3  532.55   45.60
   0   8  -3  533.75   47.70
   1   8  -3  406.26   35.20
  -1  -8  -3  377.36   37.50
   1   8  -3  410.56   38.20
  -1  -8  -3  410.26   35.30
  -1   8   3  473.15   35.00
   1   8   3  429.96   37.80
   1   8   3  430.16   35.10
  -1  -8   3  443.96   35.20
  -1   8  -3  459.15   35.10
   1  -8  -3  383.96   35.20
  -2   8   3  215.78   18.10
   2   8  -3  207.18   23.10
  -2  -8  -3  198.28   21.50
  -2  -8  -3  202.48   18.60
   2   8  -3  209.48   19.40
  -2  -8   3  234.68   18.60
   2   8   3  198.48   22.10
  -2   8  -3  197.28   18.10
  -2   8  -3  237.08   22.20
  -2  -8   3  207.68   21.20
   3   8  -3  371.76   33.50
  -3  -8  -3  404.76   35.20
   3   8  -3  333.47   36.80
  -3   8   3  405.06   31.60
  -3   8  -3  380.36   31.60
  -3  -8   3  394.56   34.60
   3   8   3  395.96   36.10
  -3  -8   3  375.86   32.40
   3   8   3  381.46   33.20
  -4  -8  -3   83.59   12.50
   4   8  -3   63.99   14.50
  -4  -8   3   74.59   11.30
   4   8   3   68.99   11.30
  -4   8  -3   67.79    7.80
   4   8   3   79.19   13.80
  -5  -8  -3  321.57   31.00
   5   8  -3  355.46   36.50
  -5  -8  -3  330.37   31.60
  -5   8   3  329.87   29.00
  -5  -8  -3  348.47   30.20
  -5  -8   3  350.66   30.30
   5   8   3  394.16   35.20
  -5  -8   3  314.37   30.20
  -5  -8   3  330.27   31.00
  -5   8  -3  348.47   28.30
  -6  -8  -3   94.39   11.40
  -6  -8  -3   94.09   12.40
  -6   8   3   96.39    9.30
  -6  -8   3   99.19   11.70
  -6   8  -3  115.49    8.70
  -6  -8   3   94.69   11.40
   0  -9   3   52.49    6.80
   0   9   3   65.29    7.10
   0  -9  -3   58.19    7.20
   0   9   3   69.09    9.80
   0   9  -3   65.29    7.30
   0   9  -3   66.29   10.00
   1   9  -3  333.77   32.40
  -1  -9  -3  333.87   29.30
   1   9  -3  354.76   29.20
   1  -9   3  320.97   28.80
  -1   9   3  364.36   29.00
  -1  -9   3  347.77   29.10
   1   9   3  357.56   29.10
   1  -9  -3  322.87   29.20
  -1   9  -3  359.56   29.10
   1   9   3  351.36   32.00
   2   9  -3  230.18   26.00
  -2   9   3  240.88   21.20
  -2  -9  -3  240.98   25.00
  -2  -9  -3  291.77   23.70
  -2   9  -3  235.78   21.30
  -2   9  -3  309.17   26.50
   2   9   3  237.48   25.20
  -2  -9   3  237.28   24.60
  -2  -9   3  229.28   21.60
   3   9  -3  611.34   55.49
  -3   9   3  626.64   49.90
  -3  -9  -3  605.24   53.29
  -3   9  -3  614.54   49.99
   3   9   3  660.23   55.29
  -3  -9   3  567.74   50.29
  -3  -9   3  611.44   52.99
  -4  -9  -3  199.38   21.20
   4   9  -3  176.58   23.80
   4   9   3  184.88   22.60
  -4  -9   3  179.38   19.90
  -5   9   3   91.89   10.30
  -5  -9  -3   92.69   11.60
  -5  -9  -3  111.89   15.00
   5   9  -3  120.09   17.50
   5   9   3  102.39   16.50
  -5  -9   3  117.99   12.40
  -5   9  -3   97.99    9.50
   6   9  -3  206.78   22.40
  -6  -9  -3  160.18   18.90
  -6  -9  -3  182.88   18.10
  -6  -9   3  197.88   18.50
  -6   9  -3  219.28   15.80
  -6  -9   3  177.08   18.40
   0 -10   3   23.50    4.30
   0  10   3   24.60    6.90
   0  10   3   21.50    4.40
   0  10  -3   22.20    4.50
   0 -10  -3   23.80    4.70
  -1 -10  -3   78.29    9.80
   1  10  -3   81.89    9.90
  -1  10   3   87.49    9.30
   1  10  -3  103.19   15.10
   1 -10   3   87.79    9.40
  -1 -10  -3  109.59   12.70
   1  10   3   93.39   13.60
  -1 -10   3   95.19    9.70
   1 -10  -3   86.09    9.80
  -1  10  -3   86.49    9.60
   1  10   3   92.89    9.80
   2  10  -3  123.99   18.60
  -2 -10  -3  170.78   15.70
  -2  10   3  136.19   12.50
  -2 -10  -3  111.19   16.50
  -2  10  -3  123.49   12.60
   2  10   3  134.79   18.30
  -2 -10   3  125.29   12.90
   3  10  -3  949.40   80.69
  -3  10   3  948.61   74.69
  -3 -10  -3  872.81   77.69
  -3 -10   3  852.41   77.49
   3  10   3  973.00   79.59
  -3  10  -3  919.91   74.69
  -3 -10   3  920.21   79.39
   4  10  -3  114.19   18.90
  -4 -10  -3  114.89   16.50
   4  10   3  137.89   19.60
  -4 -10   3  112.69   16.80
  -4 -10   3  151.48   14.60
  -5 -10  -3   30.90    6.30
   5  10  -3   33.40   11.40
  -5 -10   3   37.50    6.80
  -5  10  -3   31.50    4.20
   5  10   3   35.70   10.00
  -6 -10  -3   23.60    5.00
  -6 -10   3   22.20    5.20
   0  11   3   22.40    4.90
   0 -11  -3   39.80    8.00
   0 -11  -3   20.00    5.00
   0 -11   3   25.60    5.00
   0  11  -3   28.50    5.60
  -1 -11  -3  189.68   17.70
  -1  11   3  139.89   14.00
   1 -11   3  140.19   14.10
   1  11  -3  142.09   14.70
   1  11  -3  139.29   18.60
   1  11   3  130.19   15.00
  -1 -11   3  150.28   14.50
   1  11   3  147.89   17.50
  -1  11  -3  141.19   14.30
   1 -11  -3  130.49   14.30
   1 -11  -3  191.68   17.60
   2  11  -3  320.17   33.10
  -2 -11  -3  379.76   30.70
  -2  11   3  303.97   27.80
   2 -11  -3  286.27   28.60
   2  11   3  307.87   31.90
  -2  11  -3  315.27   28.00
  -2 -11   3  321.97   28.30
   2 -11  -3  403.16   31.60
  -3 -11  -3   27.80    8.90
  -3  11   3   48.60    5.90
   3  11  -3   24.50   10.70
   3  11   3   41.70   10.70
  -3 -11   3   23.60    9.70
   4  11  -3  155.58   21.00
  -4 -11  -3  148.99   15.50
  -4 -11   3  164.48   16.20
   4  11   3  148.29   20.10
  -5 -11  -3   20.30    5.10
   5  11  -3   16.70    8.50
  -5 -11   3   21.60    5.50
   5  11   3   27.60    8.00
   0  12  -3    9.30    4.60
   0  12   3   13.70    4.60
   0 -12  -3   13.80    6.60
   0 -12   3   12.30    4.20
  -1 -12  -3  327.17   26.80
   1  12  -3  253.67   26.90
  -1  12   3  273.97   23.70
   1 -12   3  248.88   23.60
   1  12   3  270.97   25.80
   1 -12  -3  235.88   23.70
  -1  12  -3  253.67   23.80
  -1 -12   3  256.77   23.80
   1 -12  -3  320.77   26.80
  -2  12   3   33.90    6.00
  -2 -12  -3   37.90    8.10
   2  12  -3   30.90    9.90
   2 -12   3   36.30    6.20
  -2 -12   3   39.60    7.80
  -2  12  -3   24.90    6.00
  -2 -12   3   18.60    4.80
   2 -12  -3   39.10    8.90
   2  12   3   31.20    8.70
   3  12  -3  116.39   16.80
   3  12   3  102.59   15.80
  -4 -12  -3   35.50    6.20
   4  12  -3   28.40    9.80
  -4 -12   3   36.60    6.60
   4  12   3   34.30    9.20
  -5 -12  -3   23.60    4.70
   0 -13  -3   25.80    7.40
   0 -13   3   21.10    5.00
   1 -13   3   85.89   10.10
  -1 -13  -3   99.19   13.40
   1 -13  -3   97.29   13.10
  -1 -13   3   72.59    9.80
  -1 -13   3  118.89   13.00
   2 -13   3  126.09   14.20
  -2 -13  -3  140.69   16.50
   2 -13   3  185.78   17.80
   2  13  -3  150.98   18.00
   2  13   3  136.69   16.60
  -2 -13   3  160.98   16.30
   2 -13  -3  155.58   17.80
   3  13  -3   96.69   14.10
   3  13   3   94.69   13.20
  -4 -13  -3   15.70    4.00
   4  13  -3   17.20    6.60
  -4 -13   3   13.60    4.30
   4  13   3   10.30    5.70
   0 -14   3   31.20    5.50
   0 -14  -3   36.70    8.40
   0 -14   3   48.50    8.70
   1 -14   3    3.20    3.30
  -1 -14  -3    3.30    5.50
   1 -14   3    2.00    5.50
  -1 -14   3    6.40    5.30
   1 -14  -3    5.70    5.80
   2 -14   3   -1.10    5.50
   2 -14  -3    2.80    6.00
  -2 -14   3    2.90    5.10
  -3 -14   3   69.59    8.40
   0 -15  -3   64.59    9.60
   0 -15   3   59.09    9.00
   1 -15   3    0.80    5.00
   1 -15  -3    0.90    5.00
  -1 -15   3    1.20    6.40
   0   0  -4  979.30   78.49
   1   0  -4  245.18   20.10
   2   0  -4 2764.72  195.08
  -2   0  -4 2252.47  194.68
  -2   0   4 2189.68  194.28
  -2   0   4 2547.65  194.68
  -3   0   4   29.40    3.70
   3   0  -4   33.20    4.00
  -4   0  -4   72.19    6.80
  -4   0   4   76.19    6.00
  -4   0  -4   63.89    5.90
  -4   0   4   65.19    6.70
   4   0  -4   68.99    7.40
  -5   0   4  196.28   16.20
  -5   0   4  202.68   19.50
   5   0  -4  192.88   18.10
  -5   0  -4  188.28   16.40
  -5   0  -4  210.28   19.70
  -6   0  -4   99.89   20.40
  -6   0  -4   85.49   12.10
  -6   0   4   79.59   11.80
  -6   0  -4   75.19    7.90
  -7   0   4    4.70    4.90
  -7   0   4    1.00    2.00
  -7   0  -4    4.00    2.10
  -7   0  -4    3.30    5.00
  -8   0  -4    4.50    3.70
  -8   0   4    1.70    3.30
   0   1  -4 4463.65  367.36
   0   1   4 4750.52  366.86
  -1   1   4 2210.88  183.58
   1   1  -4 2433.86  184.08
   1   1   4 2310.27  183.58
   1  -1  -4 2260.97  183.88
  -2   1   4   71.09    6.40
  -2  -1  -4   49.20    7.70
   2   1  -4   81.09    6.90
  -2   1   4   65.99    6.00
   2  -1  -4   75.39    6.50
  -2   1  -4   74.19    6.70
  -2  -1   4   57.39    6.80
  -3   1   4   73.49    6.40
  -3  -1  -4   49.00    7.50
   3   1  -4   80.29    7.30
   3  -1  -4   72.99    6.90
  -3  -1   4   66.99    7.20
  -4  -1  -4  135.39   13.70
   4   1  -4  161.58   14.40
  -4  -1  -4  172.08   13.80
  -4  -1  -4  151.58   13.20
  -4  -1   4  156.78   13.80
   4  -1  -4  159.48   15.00
   5   1  -4  521.85   46.00
  -5  -1  -4  569.74   45.20
  -5   1   4  505.15   46.90
  -5   1   4  626.44   44.00
  -5  -1  -4  470.95   44.40
  -5  -1  -4  585.44   47.10
  -5   1  -4  517.45   47.20
  -5   1  -4  534.55   43.90
  -5  -1   4  582.24   47.00
  -6   1   4   54.79    5.10
  -6  -1  -4   39.60    6.00
  -6  -1  -4   45.20    8.70
  -6   1   4   37.50    8.90
  -6  -1   4   39.60    8.30
  -6   1  -4   59.39   17.30
  -6  -1   4   64.39    5.80
  -6   1  -4   46.40    5.30
  -6   1  -4   61.19   10.70
  -7   1   4  125.09   10.50
  -7  -1  -4   99.59   13.60
  -7   1   4  141.89   11.10
  -7   1   4   93.99   13.60
  -7  -1  -4  121.29   11.10
  -7  -1   4  107.09   13.90
  -7   1  -4  102.19   14.10
  -8  -1  -4   25.90    5.20
  -8   1   4   14.40    4.60
  -8  -1   4   17.40    5.50
  -8   1  -4   18.90    4.90
   0   2   4  541.45   43.40
   0   2  -4  543.85   43.90
  -1   2   4 5024.00  419.76
  -1  -2  -4 5824.02  420.56
  -1   2   4 4817.82  419.86
   1   2  -4 5682.53  420.36
   1   2   4 5221.38  419.76
  -1  -2   4 4764.52  420.16
  -1   2  -4 5570.54  419.86
  -2   2   4  606.84   50.89
  -2   2   4  630.54   50.79
  -2  -2  -4  675.83   51.89
   2   2  -4  694.43   51.69
   2  -2  -4  636.04   51.19
  -2  -2   4  570.74   51.39
  -3   2   4  100.89    8.90
  -3  -2  -4   97.29   10.80
  -3   2   4  107.49    9.00
   3   2  -4  128.49   10.50
  -3  -2   4  101.49   10.20
   4   2  -4  278.37   23.00
  -4  -2  -4  288.77   23.30
  -4  -2  -4  275.17   22.30
  -4  -2  -4  218.58   22.30
  -4  -2   4  249.68   22.30
  -4  -2   4  272.27   23.70
  -4   2  -4  240.28   23.80
  -5  -2  -4  328.77   27.50
  -5  -2  -4  320.97   26.10
   5   2  -4  301.47   26.80
  -5   2   4  269.57   27.70
  -5   2  -4  266.57   27.90
  -5   2  -4  299.37   35.70
  -5  -2   4  330.07   27.50
  -5  -2   4  287.67   25.30
  -6  -2  -4  811.82   61.19
  -6  -2  -4  796.92   63.39
  -6   2  -4  656.13   70.79
  -6   2  -4  652.03   63.79
  -6  -2   4  767.42   63.29
  -7   2   4   -0.60    4.50
  -7   2   4    3.50    2.00
  -7  -2  -4    1.90    4.40
  -7   2   4    3.20    1.60
  -7   2  -4    2.70    5.10
  -7  -2   4    0.60    4.30
  -8  -2  -4   69.79    9.10
   0   3   4 1888.91  161.28
   0   3  -4 2119.09  161.38
   0   3   4 2011.00  161.18
   0   3  -4 2065.39  161.78
  -1   3   4 1387.26  120.39
  -1  -3  -4 1587.64  121.39
   1   3  -4 1656.03  121.09
  -1   3   4 1463.55  120.29
  -1  -3   4 1363.26  120.99
  -1   3  -4 1521.75  120.49
   1   3   4 1581.84  120.29
   2   3  -4   16.50    2.80
  -2   3   4    9.40    1.50
  -2   3   4   11.10    1.40
  -2  -3  -4   12.80    4.50
  -2  -3   4    7.30    3.10
  -2   3  -4    9.00    1.50
  -3   3   4 1150.68   92.59
  -3  -3  -4 1226.58   93.99
  -3   3   4 1111.99   92.59
  -3  -3   4 1155.08   93.59
  -4  -3  -4  204.28   21.00
  -4  -3  -4  257.57   21.30
   4   3  -4  246.28   21.30
  -4  -3  -4  254.57   20.70
  -4   3  -4  226.08   28.70
  -4  -3   4  223.28   20.70
  -4   3  -4  201.48   22.00
  -4  -3   4  263.67   21.30
  -5   3   4   13.30    5.50
  -5  -3  -4   13.60    4.30
   5   3  -4   17.90    4.60
  -5  -3  -4   15.50    3.90
  -5  -3  -4   19.10    5.20
  -5  -3   4   23.20    4.20
  -5  -3   4   16.10    4.30
  -5   3  -4   14.50    6.20
  -5   3  -4   23.60   12.80
  -5  -3   4   17.40    4.90
  -6   3   4  277.87   24.80
  -6  -3  -4  281.87   27.10
  -6  -3  -4  307.07   26.00
  -6   3   4  318.07   23.80
  -6  -3   4  269.77   26.90
  -6   3  -4  221.78   35.60
  -6  -3   4  311.57   25.30
  -7   3   4    6.90    1.90
  -7   3   4    4.70    4.80
  -7  -3  -4    8.20    4.60
  -7   3   4    8.10    1.60
  -7   3  -4    8.00    5.50
  -7  -3   4    9.70    4.90
   0   4  -4   51.99    5.50
   0   4   4   47.00    4.70
   0   4   4   53.09    4.50
   0   4  -4   49.80    5.00
   0  -4  -4   55.39    8.30
  -1   4   4  885.71   78.19
   1   4  -4  961.20   78.39
   1   4  -4 1054.79   78.99
  -1   4   4  956.00   78.09
  -1  -4  -4  989.20   79.59
   1   4   4 1035.60   78.09
  -1   4  -4  971.70   78.29
  -1  -4   4  900.51   78.99
   1   4   4 1036.60   78.29
  -2  -4  -4   79.29    9.40
  -2   4   4   53.89    5.40
  -2   4   4   58.79    5.40
   2   4  -4   70.19    6.70
  -2   4  -4   63.29    5.60
  -2  -4   4   58.29    7.80
  -3  -4  -4  179.88   16.90
  -3   4   4  165.38   14.50
   3   4  -4  209.08   16.30
  -3   4   4  165.18   14.40
  -3  -4   4  161.78   16.10
  -3   4  -4  176.98   14.50
  -3   4  -4  171.28   23.40
  -4   4   4   10.80    2.80
   4   4  -4   11.30    3.50
  -4  -4  -4   10.70    3.10
  -4   4   4    6.30    4.30
  -4  -4  -4   13.90    5.20
  -4   4   4   17.00    2.20
  -4  -4  -4    9.80    3.40
  -4   4  -4    6.90    4.30
  -4   4  -4   11.20    9.60
  -4  -4   4    9.90    4.10
  -4  -4   4   13.80    4.00
  -4  -4   4   10.80    3.40
  -5   4   4   13.60    5.70
  -5  -4  -4   18.00    4.80
  -5  -4  -4   16.00    5.10
  -5  -4  -4   13.10    3.90
   5   4  -4   16.10    4.50
  -5   4   4   14.80    3.30
  -5   4  -4   26.00   13.10
  -5  -4   4   17.00    3.90
  -5  -4   4   14.80    4.40
  -5   4  -4    8.80    5.50
  -6  -4  -4  494.75   39.90
  -6   4   4  467.15   38.20
  -6  -4  -4  446.76   40.10
  -6  -4   4  510.05   39.10
  -6  -4   4  433.26   40.10
  -6   4  -4  363.16   49.10
  -7  -4  -4   56.49    8.90
  -7  -4   4   55.49    8.70
   0   5   4 1677.63  130.69
   0   5  -4 1726.43  130.79
   0   5   4 1678.23  130.39
   0  -5  -4 1551.04  131.79
   0   5  -4 1534.65  131.19
   1   5  -4  796.02   65.89
   1   5  -4  870.01   66.49
  -1   5   4  808.32   65.49
  -1   5   4  789.72   65.69
  -1  -5  -4  822.02   67.39
  -1  -5   4  710.73   66.59
  -1   5  -4  852.81   65.79
   1   5   4  831.52   65.79
   1   5   4  866.61   65.49
  -2  -5  -4   81.99   10.60
  -2   5   4   66.59    6.40
  -2   5   4   69.19    6.50
   2   5  -4   82.89    7.90
  -2   5  -4   74.09    6.70
  -2  -5   4   75.59    9.10
   3   5  -4  481.75   35.20
  -3   5   4  416.06   33.10
  -3  -5  -4  423.66   35.60
  -3   5   4  412.56   33.20
  -3   5   4  377.66   34.00
  -3   5  -4  426.06   34.90
  -3  -5   4  399.56   34.90
  -3   5  -4  366.16   33.10
  -3   5  -4  391.76   42.50
  -3   5  -4  399.96   33.40
  -4  -5  -4  199.38   17.90
   4   5  -4  198.48   18.50
  -4  -5  -4  197.28   18.10
  -4  -5  -4  190.08   19.50
  -4   5   4  199.88   17.40
  -4  -5   4  177.18   18.40
  -4   5  -4  192.68   16.40
  -4  -5   4  214.08   18.10
  -4   5  -4  163.48   27.80
  -5   5   4   24.30    4.50
  -5  -5  -4   26.90    5.60
  -5   5   4   13.00    5.90
  -5  -5  -4   26.90    5.70
   5   5  -4   22.00    5.30
  -5  -5   4   35.00    5.50
  -5   5  -4   14.80    6.20
  -5  -5   4   23.40    5.80
  -5   5  -4   25.50    3.20
  -5   5  -4   32.80   15.30
  -5  -5   4   22.00    5.30
  -6   5   4  154.98   13.60
  -6  -5  -4  170.68   15.80
  -6  -5  -4  149.09   15.70
  -6  -5   4  111.89   13.70
  -6  -5   4  142.09   15.60
  -6  -5   4  162.18   14.70
  -7  -5  -4   44.30    7.80
  -7  -5   4   57.99    6.30
  -7  -5   4   43.90    7.70
   0   6   4 1538.65  120.79
   0   6  -4 1522.45  121.19
   0   6   4 1474.75  121.09
  -1   6   4   30.90    3.30
  -1   6   4   33.40    3.60
  -1  -6  -4   28.80    6.80
   1   6  -4   27.00    4.40
   1   6  -4   29.40    4.00
  -1  -6   4   26.90    5.60
   1   6   4   28.50    3.80
  -1   6  -4   30.90    3.90
  -2   6   4  589.74   47.50
  -2  -6  -4  582.14   49.90
   2   6  -4  627.74   49.00
  -2   6   4  572.74   47.60
  -2  -6   4  602.64   49.40
  -2   6  -4  565.64   47.70
  -3   6   4    8.30    3.20
   3   6  -4   11.00    3.40
   3   6  -4   12.10    7.80
  -3  -6  -4   11.50    5.80
   3   6   4   15.50    7.30
  -3   6  -4   10.00    2.10
  -3   6  -4   11.30    2.60
  -3  -6   4   11.10    4.70
  -3   6  -4   14.90    4.50
  -4   6   4    9.80    3.40
  -4  -6  -4   14.50    6.40
   4   6  -4   16.30    4.60
  -4  -6  -4   11.60    3.70
  -4  -6  -4    9.60    3.70
  -4  -6   4    6.60    5.00
  -4   6  -4   11.70    2.60
  -4  -6   4   13.00    3.90
  -4  -6   4   11.40    3.60
  -5   6   4   52.79    7.00
  -5  -6  -4   59.69    9.40
  -5  -6  -4   52.39    8.20
  -5  -6  -4   54.79    8.00
  -5  -6   4   49.70    8.00
  -5   6  -4   49.10    5.40
  -5  -6   4   55.29    7.50
  -5  -6   4   48.60    8.20
  -6  -6  -4  337.67   29.50
  -6   6   4  332.07   27.20
  -6  -6  -4  291.27   28.70
  -6  -6   4  311.27   29.00
  -6  -6   4  338.87   28.60
  -7  -6  -4    2.00    3.90
  -7  -6   4    1.70    2.50
  -7  -6   4    3.30    4.10
   0   7  -4   27.40    3.90
   0   7   4   26.10    3.60
  -1  -7  -4 1848.22  160.28
   1   7  -4 2028.50  159.68
  -1   7   4 2085.89  158.38
   1   7  -4 1917.91  158.78
  -1   7   4 2062.39  158.58
  -1   7  -4 2060.79  158.68
   1   7   4 1984.60  158.68
  -1  -7   4 1834.02  160.98
   2   7  -4  613.94   48.50
  -2   7   4  606.44   47.00
  -2  -7  -4  580.14   49.60
   2   7  -4  489.85   50.29
  -2  -7   4  610.74   47.40
  -2   7  -4  583.84   49.90
   2   7   4  575.24   49.90
  -2  -7   4  569.74   49.00
  -2   7  -4  556.04   47.00
   3   7  -4   76.59    9.20
  -3  -7  -4   90.89   12.00
   3   7  -4   70.99   13.20
  -3   7   4   85.19    7.30
  -3   7  -4   64.49    7.30
  -3  -7   4   70.79   10.30
  -3   7  -4   98.59   11.40
   3   7   4   87.29   12.80
  -3   7  -4   71.49    7.90
  -4  -7  -4  203.48   20.80
  -4   7   4  172.28   17.60
   4   7  -4  181.38   18.60
   4   7  -4  191.78   24.00
   4   7   4  200.88   22.60
   4   7   4  197.48   18.50
  -4   7  -4  186.08   16.70
  -4  -7   4  203.88   18.10
  -4  -7   4  198.18   19.60
  -5  -7  -4  328.77   27.80
  -5  -7  -4  287.17   28.30
  -5  -7  -4  317.27   29.20
  -5   7   4  294.47   26.70
  -5   7  -4  322.77   25.70
  -5  -7   4  309.77   27.70
  -5  -7   4  286.77   28.10
  -5  -7   4  319.77   27.90
  -6   7   4   29.00    3.00
  -6   7   4   20.20    3.70
  -6  -7  -4   17.80    5.70
  -6  -7  -4   19.00    5.30
  -6  -7   4   13.70    4.50
  -6   7  -4   18.60    2.30
  -6  -7   4   15.20    5.30
  -6   7  -4   26.70    2.60
  -7  -7  -4   24.90    5.40
  -7  -7  -4   30.10    5.00
  -7  -7   4   27.80    4.50
  -7  -7   4   30.60    5.90
   0   8   4  144.99   12.40
   0   8  -4  141.39   15.70
   0   8  -4  146.19   12.70
   0  -8   4  128.09   12.20
   0   8   4  137.89   15.00
   0  -8  -4  131.69   12.70
  -1   8   4  400.26   30.10
   1  -8   4  323.47   30.60
   1   8  -4  356.76   30.30
  -1  -8  -4  334.17   32.70
   1   8  -4  357.06   33.60
  -1  -8  -4  346.67   30.50
   1  -8  -4  323.67   30.30
   1   8   4  380.96   33.00
  -1   8  -4  385.96   30.20
  -1  -8   4  378.86   30.20
   1   8   4  393.96   30.30
  -2  -8  -4   51.29    9.50
   2   8  -4   45.30    6.90
  -2   8   4   51.39    5.60
  -2  -8  -4   59.59    8.10
   2   8  -4   48.50   10.40
  -2   8  -4   37.20    5.60
  -2   8  -4   50.89    9.40
  -2  -8   4   46.80    8.50
  -2  -8   4   53.09    6.10
   2   8   4   46.60    9.40
   3   8  -4  183.18   19.00
  -3   8   4  227.68   17.20
   3   8  -4  171.68   23.20
  -3  -8  -4  201.68   21.40
  -3  -8   4  196.18   17.70
   3   8   4  207.08   18.80
  -3  -8   4  193.38   20.60
  -3   8  -4  193.48   17.20
   3   8   4  212.48   22.40
  -4  -8  -4   24.40    8.00
   4   8  -4   15.70   10.20
  -4  -8   4   24.10    5.30
  -4  -8   4   20.80    7.10
   4   8   4   22.60    9.70
  -4   8  -4   18.30    3.70
   5   8  -4  574.44   55.69
  -5  -8  -4  601.54   52.29
  -5  -8  -4  612.94   50.99
  -5   8   4  569.44   49.99
  -5  -8  -4  559.64   51.99
  -5  -8   4  676.23   51.49
   5   8   4  614.84   54.59
  -5   8  -4  653.63   49.30
  -5  -8   4  582.54   51.19
  -5  -8   4  574.94   51.39
  -6   8   4   66.89    6.80
  -6  -8  -4   62.79   10.10
  -6  -8  -4   62.99    9.00
  -6   8  -4   70.79    5.70
  -6  -8   4   63.69    9.10
  -6  -8   4   57.39    8.50
   0  -9   4   55.89    6.40
   0  -9  -4   43.70    6.70
   0   9  -4   49.99    9.00
   0   9   4   57.19    6.60
   0   9   4   59.29    8.90
   0   9  -4   61.79    6.90
   1   9  -4  343.77   33.80
   1   9  -4  354.06   30.20
  -1   9   4  376.46   29.90
   1  -9   4  317.47   29.70
  -1  -9  -4  350.56   30.30
   1  -9  -4  331.47   30.10
   1   9   4  381.06   33.00
  -1   9  -4  366.26   30.00
   1   9   4  396.86   30.20
  -1  -9   4  356.96   30.00
  -2  -9  -4  391.76   36.70
  -2  -9  -4  458.15   35.70
   2   9  -4  349.87   37.80
  -2   9   4  403.76   33.40
   2   9   4  383.36   37.10
  -2  -9   4  410.36   33.80
  -2   9  -4  457.15   38.00
  -2   9  -4  379.06   33.50
  -2  -9   4  369.76   36.20
   3   9  -4  352.46   37.10
  -3  -9  -4  354.36   34.80
  -3   9   4  429.06   31.20
  -3   9  -4  364.86   31.10
  -3  -9   4  441.36   33.10
  -3  -9   4  344.37   34.30
   3   9   4  374.56   35.80
  -3  -9   4  313.67   31.30
   4   9  -4   35.40   12.40
  -4  -9  -4   41.90   10.10
   4   9   4   34.80   10.80
  -4  -9   4   35.70    8.70
  -4  -9   4   34.00    6.60
  -5  -9  -4   36.70   11.00
   5   9  -4   50.19   13.00
  -5  -9  -4   42.30    7.40
   5   9   4   47.30   11.30
  -5   9  -4   42.70    4.90
  -5  -9   4   39.60    7.30
  -6   9   4  111.89   10.10
  -6  -9  -4  108.09   12.10
  -6  -9  -4   99.69   13.20
   6   9  -4  111.89   16.90
  -6   9  -4  132.09    9.50
  -6  -9   4  100.99   12.10
  -6  -9   4  114.59   12.40
   0  10   4  840.92   65.59
   0 -10   4  790.02   65.49
   0 -10  -4  768.32   65.79
   0  10  -4  819.22   65.69
   0  10   4  787.02   66.79
   1 -10   4   15.10    3.60
   1  10  -4   10.00    4.00
   1  10  -4   12.30    7.70
  -1  10   4   11.30    3.40
  -1 -10  -4   18.70    6.30
  -1 -10  -4   13.50    3.90
   1  10   4   18.00    7.40
   1  10   4   12.10    3.80
  -1  10  -4   13.30    3.80
  -1 -10   4   15.40    3.80
   1 -10  -4   10.40    3.70
  -2  10   4  109.89   11.00
   2  10  -4   94.59   16.30
  -2 -10  -4  140.09   14.40
  -2 -10  -4  105.09   15.40
  -2 -10   4  112.49   11.60
   2  10   4  106.49   16.30
  -2  10  -4  145.89   17.80
  -2  10  -4  103.49   11.30
  -3  10   4  778.82   55.99
  -3 -10  -4  638.64   58.89
   3  10  -4  713.73   62.09
   3  10   4  728.63   60.89
  -3  10  -4  606.34   55.79
  -3 -10   4  701.03   58.49
  -3 -10   4  619.84   58.59
  -4 -10  -4   34.20   10.40
   4  10  -4   36.40   12.90
  -4 -10   4   31.80    6.50
   4  10   4   31.20   10.50
  -4 -10   4   20.50   12.60
  -5 -10  -4   10.20    4.50
   5  10  -4   11.50    9.30
  -5 -10   4   11.40    5.00
  -5  10  -4   12.20    2.40
   5  10   4   12.70    8.40
  -6 -10  -4    6.10    3.80
   0 -11   4  957.80   77.09
   0  11  -4  932.51   77.19
   0  11   4  993.10   77.19
   0 -11  -4  890.81   77.29
  -1  11   4  212.48   19.20
   1 -11   4  203.88   19.20
  -1 -11  -4  255.87   22.40
   1  11  -4  190.08   19.60
   1  11  -4  216.98   23.70
   1 -11  -4  180.18   19.40
  -1 -11   4  221.68   19.50
  -1  11  -4  219.08   19.60
   1 -11  -4  259.17   22.30
   1  11   4  209.98   22.30
  -2 -11  -4  246.88   22.20
   2  11  -4  193.28   24.80
  -2  11   4  215.78   19.10
   2  11   4  204.48   23.40
  -2 -11   4  205.88   19.30
   2 -11  -4  254.67   22.50
  -2  11  -4  186.48   19.10
  -3 -11  -4  189.58   22.30
  -3  11   4  205.08   18.20
   3  11  -4  225.78   25.40
   3  11   4  237.58   24.20
  -3  11  -4  190.48   18.20
  -3 -11   4  221.68   29.40
  -4 -11  -4  137.29   14.20
   4  11  -4  139.69   20.10
  -4 -11   4  140.09   14.50
   4  11   4  121.39   18.20
   5  11  -4  184.68   22.10
  -5 -11  -4  190.98   17.90
  -5 -11   4  195.78   18.10
   5  11   4  189.08   20.50
   0  12   4  405.06   35.60
   0 -12  -4  504.05   38.50
   0  12  -4  390.86   35.90
   0 -12   4  392.56   35.50
  -1  12   4   99.89   10.50
  -1 -12  -4  114.89   14.00
   1 -12   4   82.09   10.10
  -1  12  -4   87.89   10.90
   1 -12  -4  110.69   13.90
  -1 -12   4   86.19   10.40
   1  12   4   90.09   12.90
   2 -12   4   78.79    9.80
  -2 -12  -4   81.59   12.40
   2  12  -4   85.19   14.00
  -2 -12   4  104.79   12.40
  -2 -12   4   70.59    9.20
   2 -12  -4   97.39   13.50
   2  12   4   78.89   12.50
   3  12  -4   21.60    9.80
   3  12   4   18.50    7.90
  -4 -12  -4   20.60    5.00
   4  12  -4   16.10    8.80
  -4 -12   4   21.60    5.40
   4  12   4   14.50    7.50
   0 -13  -4   64.39   10.70
   0 -13   4   61.29    8.20
   1 -13   4   62.59    8.60
  -1 -13  -4   79.19   11.50
  -1 -13   4   97.99   12.00
  -1 -13   4   60.49    8.40
   1 -13  -4   75.39   11.50
   2  13  -4   61.29   10.60
  -2 -13  -4   61.49   10.40
   2 -13   4   62.99    8.20
   2  13   4   56.29    9.40
   2 -13  -4   67.09   11.20
  -2 -13   4   62.49    9.50
   3  13  -4  108.69   15.20
   3  13   4   96.89   13.20
  -4 -13  -4   40.00    6.20
   4  13  -4   41.60    8.30
  -4 -13   4   42.20    6.90
   4  13   4   36.70    7.40
   0 -14  -4   62.89   10.30
   0 -14   4   80.99   11.10
   0 -14   4   51.89    7.50
   1 -14   4   51.19    8.80
  -1 -14  -4   36.60    8.30
   1 -14   4   35.30    5.90
   1 -14  -4   45.80    8.90
  -1 -14   4   49.40    8.40
   2 -14   4   41.70    8.30
   2 -14  -4   33.20    8.30
  -2 -14   4   29.50    7.00
   0 -15  -4    8.30    5.40
   0 -15   4   -0.90    4.50
   1 -15   4   37.10    9.50
   1 -15  -4   29.90    7.80
   0   0  -5  -13.30    1.40
   1   0  -5 6132.99  489.45
  -2   0  -5 5043.10  389.36
  -2   0   5 4470.45  388.86
   2   0  -5 5181.78  389.56
  -2   0   5 4840.42  389.16
   3   0  -5  153.08   12.70
  -3   0  -5  113.79   12.40
  -3   0   5  153.48   12.30
  -4   0   5  234.58   19.30
  -4   0  -5  242.28   19.80
  -4   0   5  226.68   19.30
   4   0  -5  234.28   20.30
  -4   0  -5  222.28   18.90
  -5   0  -5  217.28   18.90
  -5   0  -5  239.78   22.10
  -5   0   5  226.78   21.60
  -6   0  -5  157.58   25.30
  -6   0  -5  143.29   13.20
  -6   0  -5  162.08   17.20
  -6   0   5  136.29   16.60
  -7   0  -5   37.80    4.50
  -7   0   5   23.80    6.90
  -7   0  -5   33.90    8.00
  -7   0   5   32.00    4.60
  -8   0  -5    4.10    3.60
   0   1  -5 8677.33  692.63
   1   1  -5 1164.48   90.49
  -1  -1  -5 1238.28   90.49
  -1   1   5 1057.29   89.89
  -1   1   5 1106.49   89.99
  -1  -1   5 1131.79   90.39
   1  -1  -5 1063.89   90.29
   2   1  -5 2692.33  192.78
  -2   1   5 2239.78  191.98
  -2   1   5 2565.24  192.18
  -2  -1  -5 2156.08  192.58
  -2   1  -5 2352.26  192.18
  -2  -1   5 2311.77  192.38
   2  -1  -5 2541.45  192.58
   3   1  -5 1154.18   87.09
  -3   1   5 1082.59   86.09
  -3  -1   5 1016.40   86.39
   3  -1  -5 1047.50   86.69
  -4  -1  -5  777.92   71.69
  -4  -1  -5  980.20   72.49
  -4   1   5  862.31   71.49
   4   1  -5  912.81   72.99
  -4  -1   5  936.61   72.09
   5   1  -5  409.26   34.30
  -5  -1  -5  455.65   33.60
  -5   1   5  356.86   34.90
  -5  -1  -5  446.06   35.30
  -5  -1  -5  333.37   32.50
  -5  -1   5  396.86   32.30
  -5   1  -5  388.86   35.40
  -5  -1   5  437.46   35.10
  -5   1  -5  357.66   32.00
  -6   1   5    3.00    5.20
  -6   1   5    6.10    1.70
  -6  -1  -5    5.50    5.30
  -6  -1  -5    2.20    2.50
  -6  -1   5    8.30    2.30
  -6   1  -5    4.70    5.40
  -6   1  -5    4.10    2.10
  -6   1  -5    4.30   11.10
  -6  -1   5    7.50    4.90
  -7  -1  -5   38.20    8.40
  -7   1   5   57.19    5.60
  -7   1   5   36.50    8.30
  -7  -1  -5   58.09    6.40
  -7   1   5   62.29    6.50
  -7  -1   5   56.59    9.30
  -7   1  -5   52.99    9.60
  -8  -1  -5   16.60    5.00
  -8   1  -5   21.20    6.30
   0   2  -5 3127.19  250.07
   0   2   5 3137.29  249.48
  -1   2   5 1705.73  141.19
  -1  -2  -5 1881.81  141.99
  -1   2   5 1679.93  141.19
   1   2  -5 1893.01  141.89
  -1   2  -5 1917.21  141.29
   1   2   5 1735.43  141.09
  -1  -2   5 1581.74  141.59
  -2   2   5 1344.27  106.39
  -2  -2  -5 1429.26  107.39
  -2   2   5 1269.17  106.29
   2   2  -5 1479.05  107.29
   2  -2  -5 1265.17  106.69
  -2  -2   5 1210.08  106.89
  -3  -2  -5   73.69    8.60
  -3   2   5   63.69    5.60
  -3   2   5   58.69    5.40
  -3  -2   5   70.79    7.10
   4   2  -5  577.84   46.00
  -4  -2  -5  454.25   45.10
  -4  -2  -5  586.24   46.10
  -4  -2  -5  590.84   45.40
  -4  -2   5  590.54   46.40
  -4   2  -5  502.15   46.50
  -4  -2   5  538.95   45.10
  -5   2   5   45.10    8.60
  -5  -2  -5   58.09    8.70
  -5  -2  -5   66.49    7.50
   5   2  -5   59.59    7.90
  -5   2  -5   57.89   10.10
  -5   2  -5   59.19   17.00
  -5  -2   5   58.19    7.00
  -5  -2   5   67.49    8.90
  -6  -2  -5  151.48   16.50
  -6   2   5  180.48   12.80
  -6   2   5  119.89   16.50
  -6   2  -5  124.59   16.90
  -6   2  -5  119.79   24.80
  -6  -2   5  154.98   16.50
  -7   2   5   13.80    6.00
  -7   2   5   18.40    2.70
  -7  -2  -5   15.50    5.80
  -7   2   5   17.60    3.30
  -7   2  -5   12.90    6.20
  -7  -2   5   17.50    5.80
   0   3  -5 2188.18  160.38
   0   3   5 2006.60  160.08
   0   3   5 1860.41  160.18
   0   3  -5 1979.20  160.88
   1   3  -5 1840.12  133.99
   1   3  -5 1687.83  133.59
  -1   3   5 1523.15  133.19
  -1  -3  -5 1730.13  134.29
  -1   3   5 1608.84  133.09
   1   3   5 1752.02  133.09
  -1  -3   5 1474.05  133.69
  -1   3  -5 1737.83  133.29
  -2   3   5   57.89    4.90
  -2  -3  -5   54.49    7.50
  -2   3   5   54.59    5.00
   2   3  -5   66.19    6.20
  -2  -3   5   45.70    6.60
  -2   3  -5   54.19    5.20
  -3   3   5 1116.49   89.69
  -3   3   5 1082.49   89.59
  -3  -3  -5 1199.58   91.19
  -3  -3   5 1097.59   90.59
   4   3  -5  104.89   10.80
  -4  -3  -5  105.39   10.30
  -4  -3  -5  113.69   10.90
  -4  -3  -5  110.19   11.70
  -4   3  -5   80.39   11.80
  -4  -3   5  112.79   10.90
  -4  -3   5   97.69   10.70
  -4   3  -5  117.19   21.20
  -5  -3  -5   56.19    7.30
  -5  -3  -5   55.49    8.10
  -5   3   5   45.00    9.00
   5   3  -5   56.89    7.60
  -5  -3  -5   47.30    7.10
  -5  -3   5   55.99    7.40
  -5   3  -5   51.69   16.30
  -5   3  -5   50.49    9.80
  -5  -3   5   56.59    8.10
  -6  -3  -5   18.90    5.90
  -6   3   5   13.70    6.40
  -6   3   5   18.50    3.80
  -6  -3  -5   14.20    4.30
  -6   3   5   17.20    2.30
  -6   3  -5   11.10    6.40
  -6  -3   5   10.60    5.00
  -6   3  -5   17.50   12.70
  -6  -3   5   14.20    3.50
  -7   3   5    2.60    2.00
  -7   3   5    1.20    4.50
  -7  -3  -5    2.50    4.20
  -7   3   5    2.90    1.30
  -7   3  -5    1.80    4.90
  -7  -3   5    4.40    4.50
   0  -4  -5  273.27   26.30
   0   4  -5  287.87   25.40
   0   4   5  322.17   24.50
   0   4   5  300.17   24.70
   0   4  -5  327.57   24.90
   1   4  -5   80.19    7.00
  -1   4   5   66.39    5.80
  -1   4   5   63.39    5.90
  -1  -4  -5  100.09    9.90
   1   4  -5   64.29    6.50
   1   4   5   61.79    6.00
   1   4   5   63.49    5.60
  -1  -4   5   63.39    7.90
  -1   4  -5   66.39    6.10
  -2   4   5   74.99    6.60
  -2   4   5   74.99    6.50
  -2  -4  -5   69.29    9.30
   2   4  -5   83.29    7.90
  -2   4  -5   74.49    6.70
  -2  -4   5   60.39    8.60
  -3  -4  -5  922.91   71.89
  -3   4   5  864.81   70.09
  -3   4   5  870.51   70.09
  -3  -4   5  891.61   71.29
  -3   4  -5  839.32   77.79
  -3   4  -5  862.01   70.09
  -4  -4  -5  102.09   12.20
  -4  -4  -5  107.89   10.40
   4   4  -5   92.09   10.40
  -4  -4  -5  103.79   10.30
  -4   4   5  103.39    9.60
  -4  -4   5   94.89   10.80
  -4   4  -5   92.19    8.40
  -4  -4   5   99.99   10.40
  -4   4  -5   99.29   19.80
  -5   4   5  216.68   18.70
   5   4  -5  203.48   20.10
  -5  -4  -5  181.48   19.60
  -5  -4  -5  213.78   19.80
  -5  -4  -5  208.58   19.90
  -5   4  -5  233.08   17.20
  -5   4  -5  203.78   31.00
  -5  -4   5  215.48   20.00
  -5  -4   5  195.98   19.10
  -6   4   5   93.79    7.00
  -6  -4  -5   68.49   10.30
  -6   4   5   75.29    8.30
  -6  -4  -5   76.39   10.00
  -6   4  -5   58.89   18.60
  -6  -4   5   69.69   10.20
  -6   4  -5   52.09   11.60
  -6  -4   5   77.69    8.80
  -7  -4  -5   14.00    5.10
  -7  -4   5   15.30    5.10
   0   5  -5  257.57   23.40
   0   5   5  294.07   22.80
   0   5   5  297.57   22.50
   0  -5  -5  241.48   24.70
   0   5  -5  286.27   23.00
  -1   5   5  890.31   72.19
   1   5  -5  967.00   73.29
  -1   5   5  824.32   72.29
  -1  -5  -5  932.21   74.09
   1   5  -5  896.71   72.59
  -1   5  -5  951.30   72.49
   1   5   5  904.31   72.09
  -1  -5   5  859.31   73.39
   1   5   5  891.91   72.39
  -2  -5  -5  275.47   24.70
  -2   5   5  263.47   22.10
  -2   5   5  269.07   22.00
   2   5  -5  300.37   23.50
  -2  -5   5  253.27   23.70
  -2   5  -5  257.67   22.20
  -3   5   5   30.20    3.10
  -3   5   5   21.30    4.20
  -3  -5  -5   26.60    6.40
   3   5  -5   31.90    4.90
  -3   5   5   30.90    3.10
  -3   5  -5   22.80    5.00
  -3   5  -5   23.00   11.70
  -3   5  -5   23.90    3.10
  -3   5  -5   21.50    3.30
  -3  -5   5   25.20    5.40
  -4  -5  -5   37.10    6.10
  -4   5   5   32.80    5.30
  -4  -5  -5   36.80    5.70
   4   5  -5   36.40    6.00
  -4  -5  -5   41.50    8.00
  -4  -5   5   50.29    6.30
  -4  -5   5   38.80    6.00
  -4   5  -5   21.50    6.80
  -4   5  -5   35.00    4.00
  -4   5  -5   41.80   15.10
  -4  -5   5   28.80    6.20
  -5  -5  -5  554.44   51.69
  -5  -5  -5  623.34   52.19
   5   5  -5  563.04   52.29
  -5  -5  -5  641.34   51.89
  -5   5   5  641.94   50.99
  -5  -5   5  645.64   51.99
  -5   5  -5  556.24   62.79
  -5   5  -5  698.43   49.60
  -5  -5   5  560.84   51.19
  -6  -5  -5  879.61   69.89
  -6  -5  -5  768.22   69.39
  -6   5   5  828.62   67.89
  -6  -5   5  934.71   68.99
  -6  -5   5  753.92   69.29
  -7  -5  -5   25.70    6.00
  -7  -5   5   33.90    4.90
  -7  -5   5   32.40    6.70
   0   6   5 1260.57  101.09
   0   6  -5 1248.18  101.19
   0   6   5 1270.27  100.79
  -1  -6  -5  715.13   60.59
  -1   6   5  741.43   58.69
   1   6  -5  733.43   58.99
   1   6  -5  746.13   59.69
  -1  -6   5  679.53   59.89
   1   6   5  751.12   58.39
  -1   6  -5  727.73   58.79
   1   6   5  718.23   58.79
   2   6  -5  182.28   15.60
  -2   6   5  169.78   13.90
  -2  -6  -5  171.98   17.60
  -2   6   5  163.68   14.00
  -2   6  -5  154.88   14.10
  -2  -6   5  155.88   16.20
   3   6  -5   21.40    8.50
   3   6  -5   14.00    4.00
  -3  -6  -5   16.30    6.30
  -3   6   5   10.40    2.10
  -3   6   5   10.80    2.10
   3   6   5   20.40    7.40
  -3  -6   5   15.50    5.20
  -3   6  -5   10.70    4.80
  -3   6  -5   11.90    2.60
  -4  -6  -5   66.69   10.70
  -4  -6  -5   65.69    8.70
  -4  -6  -5   65.49    8.00
   4   6  -5   62.89    8.60
  -4   6   5   59.49    7.90
  -4  -6   5   66.99    8.10
  -4  -6   5   63.69    9.20
  -4  -6   5   72.49    9.10
  -4   6  -5   60.99    6.50
  -5  -6  -5  403.66   35.20
  -5   6   5  378.86   33.40
  -5  -6  -5  381.36   34.20
  -5  -6  -5  375.56   34.70
  -5  -6   5  387.36   34.20
  -5  -6   5  418.36   34.20
  -5  -6   5  375.56   34.10
  -5   6  -5  413.16   32.10
  -6  -6  -5   41.10    7.40
  -6   6   5   36.00    5.20
  -6  -6  -5   28.50    6.80
  -6  -6   5   40.00    7.20
  -6  -6   5   35.30    6.10
  -7  -6  -5   10.90    4.50
  -7  -6   5    7.50    4.40
  -7  -6   5   12.00    3.20
   0   7   5  251.17   20.50
   0   7   5  251.97   20.90
   0   7  -5  246.98   21.10
   1   7  -5  258.07   23.60
  -1  -7  -5  262.77   25.30
   1   7  -5  253.27   22.80
  -1   7   5  268.27   22.20
   1   7  -5  269.77   31.30
  -1   7   5  272.57   22.50
   1   7   5  289.67   26.70
   1   7   5  259.47   22.60
  -1   7  -5  285.47   22.70
  -1  -7   5  293.37   24.40
  -2  -7  -5   31.60    5.90
   2   7  -5   27.70    8.60
  -2   7   5   29.10    3.70
  -2  -7  -5   29.00    7.50
  -2   7   5   24.60    3.20
   2   7  -5   26.90    5.10
  -2   7  -5   24.80    3.80
  -2   7  -5   22.60    6.80
   2   7   5   32.20    7.80
  -2  -7   5   22.10    6.00
  -2  -7   5   27.30    4.00
   3   7  -5    5.30    7.20
  -3   7   5    3.70    1.70
   3   7  -5    2.00    2.90
  -3  -7  -5    0.10    6.00
  -3  -7   5    1.00    4.80
  -3   7  -5    2.70    1.90
  -3   7  -5    0.10    4.10
   3   7   5    3.80    6.40
  -3   7  -5    1.60    1.90
  -4  -7  -5  474.45   40.80
   4   7  -5  432.16   39.60
  -4   7   5  442.86   38.50
  -4   7   5  430.36   36.80
   4   7  -5  413.36   43.80
   4   7   5  510.35   42.50
  -4   7  -5  477.05   37.40
  -4  -7   5  483.95   38.90
  -4  -7   5  425.76   39.30
  -5   7   5  321.77   28.30
  -5  -7  -5  338.47   30.70
  -5  -7  -5  310.27   29.90
  -5  -7  -5  323.47   29.00
  -5  -7   5  324.97   29.10
  -5  -7   5  317.77   29.40
  -5  -7   5  328.87   29.10
  -5   7  -5  344.17   27.00
  -6   7   5   53.49    6.60
  -6  -7  -5   49.80    8.50
  -6  -7  -5   54.19    9.40
  -6  -7   5   53.29    7.90
  -6  -7   5   52.89    8.60
  -6   7  -5   64.99    5.00
  -7  -7  -5   89.39   10.50
  -7  -7   5   91.09   10.90
  -7  -7   5  108.89    9.90
   0   8  -5  668.53   59.39
   0  -8  -5  672.73   57.59
   0   8   5  725.43   57.29
   0   8   5  742.83   59.09
   0  -8   5  683.03   57.19
   0   8  -5  736.13   57.49
   1   8  -5  205.88   18.60
  -1   8   5  243.88   18.40
  -1  -8  -5  196.88   21.60
   1  -8   5  185.58   18.00
   1   8  -5  201.68   22.50
  -1  -8  -5  209.78   18.70
   1  -8  -5  192.88   18.60
  -1  -8   5  223.88   18.40
  -1   8  -5  222.58   18.50
   1   8   5  237.28   18.50
   1   8   5  215.58   21.40
   2   8  -5    8.90    3.70
  -2  -8  -5    7.10    6.50
  -2   8   5    8.70    2.40
   2   8  -5   -0.30    6.80
  -2  -8  -5    6.90    4.70
  -2   8  -5   16.20    6.30
  -2  -8   5    9.60    5.80
  -2   8  -5    8.20    2.70
   2   8   5    8.50    6.30
  -2  -8   5   10.40    2.90
   3   8  -5  149.99   15.90
  -3  -8  -5  153.48   18.40
  -3   8   5  175.38   13.80
   3   8  -5  125.59   19.70
  -3   8  -5  197.48   18.40
   3   8   5  154.08   15.30
  -3   8  -5  155.18   13.90
  -3  -8   5  145.49   14.20
  -3  -8   5  150.68   17.40
   3   8   5  145.99   18.80
   4   8  -5   29.80   11.60
  -4  -8  -5   24.90    8.10
  -4  -8   5   24.70    5.40
  -4  -8   5   29.50    7.70
   4   8   5   27.70    9.70
  -4   8  -5   26.80    4.20
  -5  -8  -5    6.50    4.10
  -5  -8  -5    4.40    4.70
  -5   8   5    8.50    3.70
  -5  -8  -5   10.50    7.30
   5   8  -5   15.80   10.50
  -5   8  -5    3.20    1.80
  -5  -8   5    2.40    3.30
  -5  -8   5    4.50    4.00
  -5  -8   5    8.80    6.10
   5   8   5    6.10    8.20
  -6  -8  -5   21.70    6.40
  -6  -8  -5   29.10    6.20
  -6   8   5   40.30    3.80
  -6   8   5   27.70    4.30
  -6   8  -5   36.60    3.20
  -6  -8   5   29.90    6.40
  -6   8  -5   30.00    3.00
  -6  -8   5   24.10    5.40
   0  -9  -5  355.36   32.70
   0   9  -5  400.86   32.70
   0   9  -5  389.26   35.00
   0   9   5  404.96   32.50
   0  -9   5  372.96   32.30
   0   9   5  417.76   34.50
   1  -9   5   93.29    9.60
   1   9  -5   90.09   14.40
  -1  -9  -5  126.09   12.70
  -1  -9  -5   91.89   10.20
  -1   9   5  109.19    9.90
   1   9  -5   99.89   10.50
   1   9   5  113.59   10.20
  -1  -9   5  100.29    9.90
   1  -9  -5   92.19   10.30
  -1   9  -5   93.79   10.00
   1   9   5  102.19   14.00
   2   9  -5   16.90    8.70
  -2  -9  -5   17.70    5.70
  -2  -9  -5   16.80    7.80
   2   9   5   17.00    7.40
  -2  -9   5   14.40    3.60
  -2  -9   5   17.80    7.40
  -2   9  -5   11.70    3.50
  -2   9  -5   15.80    7.20
  -3   9   5  502.65   37.30
   3   9  -5  454.65   43.70
  -3  -9  -5  454.45   41.00
   3   9  -5  407.96   40.00
  -3  -9   5  471.35   40.50
   3   9   5  495.95   42.10
  -3  -9   5  442.36   37.70
  -3   9  -5  411.16   37.20
  -4  -9  -5   89.19   13.30
   4   9  -5   92.79   17.10
  -4  -9   5   72.89   12.20
   4   9   5  101.99   15.60
  -4  -9   5   98.09   11.20
   5   9  -5   89.19   16.00
  -5  -9  -5   88.69   10.50
  -5   9  -5   79.79    7.90
   5   9   5   82.39   14.40
  -5  -9   5   92.39   11.00
  -6   9   5   18.90    3.20
   6   9  -5   26.50    9.10
  -6  -9  -5   19.30    5.10
  -6  -9  -5   17.30    5.70
  -6   9  -5   28.90    2.50
  -6   9  -5   22.90    2.30
  -6  -9   5   25.50    5.70
  -6  -9   5   19.50    5.00
   0  10  -5   -0.60    3.00
   0 -10  -5    9.90    5.40
   0  10   5    5.20    5.10
   0 -10  -5    2.60    3.20
   0 -10   5    5.20    2.80
   0  10   5    6.60    3.10
  -1  10   5   77.39    8.10
   1  10  -5   71.39   12.30
  -1 -10  -5   84.89   11.60
   1  10  -5   68.99    8.70
   1 -10   5   62.69    7.70
   1 -10  -5   59.89    8.40
  -1  10  -5   69.89    8.50
  -1 -10   5   68.49    8.10
   1  10   5   61.79   10.90
   1  10   5   65.29    8.30
   1 -10  -5   94.09   11.70
   2  10  -5   93.49   16.60
  -2  10   5  111.89   10.90
  -2 -10  -5   96.69   15.10
  -2 -10  -5  126.59   14.10
  -2 -10   5  109.79   11.40
  -2  10  -5  102.79   11.20
  -2  10  -5  136.79   17.40
   2  10   5  115.39   16.60
  -3 -10  -5  135.29   17.90
   3  10  -5  117.69   19.30
   3  10   5  161.48   19.50
  -3 -10   5  120.59   13.10
  -3  10  -5  137.39   12.60
  -3 -10   5  137.89   15.90
  -3 -10   5  138.89   17.20
   4  10  -5  131.79   22.00
  -4 -10   5  188.48   17.50
   4  10   5  174.18   21.90
   5  10  -5  190.08   23.10
  -5 -10  -5  186.98   17.80
  -5  10  -5  186.28   15.90
  -5 -10   5  193.18   18.40
   5  10   5  180.68   21.20
  -6 -10  -5    2.60    3.40
   0 -11   5  334.67   28.30
   0  11   5  334.77   28.40
   0  11  -5  312.07   28.60
  -1  11   5  685.33   57.99
   1  11  -5  696.93   61.59
   1  11  -5  599.54   58.29
   1 -11   5  685.13   57.99
  -1 -11  -5  832.42   60.79
   1  11   5  686.43   60.29
  -1 -11   5  719.13   58.29
   1 -11  -5  837.62   60.69
  -1  11  -5  640.24   58.19
  -2  11   5  171.88   16.00
   2  11  -5  161.98   22.30
  -2 -11  -5  181.28   18.80
   2 -11  -5  195.78   19.50
  -2 -11   5  163.38   16.20
  -2  11  -5  179.88   16.30
   2  11   5  164.28   20.50
   3  11  -5  101.49   17.10
  -3  11   5  115.49   10.40
  -3 -11  -5  103.99   16.60
  -3  11  -5   87.89   10.50
   3  11   5  115.89   16.50
   4  11  -5   88.19   16.40
  -4 -11  -5  100.49   11.30
  -4 -11   5  109.49   12.10
   4  11   5   89.29   14.50
  -5 -11  -5    7.60    4.10
   5  11  -5   12.80    8.10
   5  11   5   16.00    6.60
  -5 -11   5   13.60    4.70
   0  12  -5  182.58   18.40
   0  12   5  188.98   18.10
   0 -12   5  189.98   17.80
   0 -12  -5  207.78   20.80
  -1  12   5   28.10    5.10
   1  12  -5   22.00    9.20
  -1 -12  -5   31.30    8.20
   1 -12   5   25.80    5.20
  -1  12  -5   21.50    5.50
   1  12   5   27.40    7.20
   1 -12  -5   33.00    8.10
  -1 -12   5   23.20    5.20
   2  12  -5  217.38   24.00
   2 -12   5  211.88   20.40
  -2 -12  -5  232.18   21.80
  -2 -12   5  188.48   19.10
   2 -12  -5  247.88   23.20
   2  12   5  207.58   22.40
   3  12  -5  238.78   25.40
   3  12   5  202.78   23.00
   4  12  -5   46.80   11.20
  -4 -12  -5   53.39    7.70
  -4 -12   5   57.59    8.20
   4  12   5   44.30    9.70
   0 -13   5   -4.30    2.90
   0 -13  -5    4.90    5.90
   1 -13   5   30.10    5.50
  -1 -13  -5   37.70    8.50
   1 -13  -5   31.70    8.20
  -1 -13   5   24.40    5.20
  -2 -13  -5  159.68   17.50
   2 -13   5  135.39   14.80
   2  13  -5  170.58   18.50
   2  13   5  158.38   16.80
  -2 -13   5  167.28   16.70
   2 -13  -5  170.08   18.60
   3  13  -5  117.19   15.60
   3  13   5  112.39   13.80
   4  13  -5   30.20    8.80
  -4 -13  -5   40.40    5.80
   4  13   5   27.20    7.00
   0 -14   5    7.40    3.40
   0 -14  -5   10.90    6.20
   0 -14   5   16.60    6.50
   1 -14   5   65.69    9.70
   1 -14   5   45.90    7.10
  -1 -14  -5   57.29    9.60
   1 -14  -5   53.29    9.50
  -1 -14   5   58.89    9.00
   2 -14   5   65.79    9.60
   2 -14   5   53.59    7.20
   2 -14  -5   59.79   10.00
  -2 -14   5   40.90    9.60
  -3 -14  -5   90.19    9.30
   0 -15   5   31.40    6.80
   0 -15  -5   29.80    7.00
   1 -15  -5   11.50    8.40
   0   0  -6 4962.70  395.86
  -1   0   6 1750.42  142.09
  -1   0  -6 1912.21  142.29
   1   0  -6 1680.23  142.39
  -2   0   6 1526.65  135.69
  -2   0  -6 1749.12  136.29
   2   0  -6 1809.12  136.49
  -2   0   6 1725.83  136.09
  -3   0   6  343.57   28.40
   3   0  -6  347.17   28.90
   4   0  -6   20.00    3.90
  -4   0  -6   24.10    4.00
  -4   0  -6   18.40    2.60
  -4   0   6   21.10    3.20
  -5   0   6    1.30    2.10
  -5   0  -6    0.80    3.90
  -5   0  -6    1.50    1.30
  -5   0   6   -1.70    3.10
  -5   0  -6    1.10    1.70
  -6   0  -6  165.48   25.90
  -6   0   6  167.48   17.90
  -6   0  -6  160.08   17.90
  -6   0  -6  158.18   14.40
  -7   0   6  315.77   32.30
  -7   0  -6  401.56   29.90
  -7   0  -6  353.06   32.90
   0   1  -6  275.57   23.00
   1   1  -6 2544.85  191.08
  -1   1   6 2312.67  190.38
  -1   1   6 2462.35  190.48
  -1  -1  -6 2606.94  190.98
  -1  -1   6 2390.56  190.68
   1  -1  -6 2021.20  190.78
  -2  -1  -6    8.60    3.60
  -2   1   6   17.10    2.40
   2   1  -6   15.30    2.80
  -2   1   6   14.40    1.80
  -2   1  -6   14.70    2.90
  -2  -1   6   11.00    2.60
   2  -1  -6   17.10    2.60
  -3   1   6  476.65   34.80
  -3  -1  -6  353.36   35.40
   3   1  -6  491.65   35.90
  -3   1   6  382.76   34.40
   3  -1  -6  432.46   35.40
  -3  -1   6  431.86   35.20
  -4  -1  -6  328.37   27.10
  -4   1   6  305.87   26.00
  -4  -1  -6  342.97   28.40
   4   1  -6  313.07   27.40
  -4  -1   6  314.67   26.60
  -4   1  -6  353.16   30.80
  -4   1  -6  296.87   26.80
  -5  -1  -6  131.09   11.90
  -5  -1  -6  139.69   13.60
  -5  -1  -6  104.09   10.70
   5   1  -6  115.59   12.10
  -5   1   6  110.29   13.20
  -5   1  -6  109.29   10.10
  -5   1  -6  113.59   13.60
  -5  -1   6  120.29   13.00
  -5  -1   6  111.79   10.40
  -6  -1  -6  163.38   17.20
  -6   1   6  131.99   16.80
  -6  -1  -6  150.88   14.10
  -6   1  -6  155.98   26.50
  -6   1  -6  153.58   13.40
  -6   1  -6  142.89   17.50
  -6  -1   6  175.28   17.30
  -7   1   6    9.50    3.00
  -7  -1  -6    6.50    5.30
  -7   1   6    8.10    5.00
  -7  -1  -6    7.20    2.80
  -7   1   6    8.30    2.30
  -7  -1   6    6.30    5.00
  -7   1  -6    7.80    5.50
   0   2   6  299.17   23.80
   0   2  -6  281.67   24.60
   0   2  -6  304.17   24.10
  -1  -2  -6  940.01   72.19
   1   2  -6  960.50   72.09
  -1   2   6  842.02   71.29
  -1   2   6  855.21   71.19
  -1   2  -6  935.51   71.39
   1   2   6  870.61   71.09
  -1  -2   6  838.12   71.69
   2   2  -6 1173.68   85.29
  -2   2   6 1084.19   84.29
  -2   2   6 1047.60   84.19
  -2  -2  -6 1050.59   85.29
   2  -2  -6  970.00   84.69
  -2  -2   6  999.20   84.79
  -3   2   6 2122.19  187.48
  -3  -2  -6 2303.97  188.68
   3   2  -6 2625.24  189.08
  -3   2   6 2379.86  187.68
  -3  -2   6 2330.97  188.28
  -4   2   6  797.12   69.89
   4   2  -6  892.11   71.79
  -4  -2  -6 1000.80   72.09
  -4  -2  -6  734.33   70.89
  -4  -2  -6  911.21   71.39
  -4   2  -6  837.42   72.39
  -4  -2   6  936.51   71.79
  -4  -2   6  887.71   70.89
   5   2  -6   82.89    9.80
  -5  -2  -6   94.19   10.70
  -5   2   6   63.79   10.50
  -5  -2  -6   88.29    9.60
  -5  -2   6   79.39    8.60
  -5   2  -6   94.89   21.20
  -5  -2   6   98.29   10.70
  -5   2  -6   76.99   11.40
  -5   2  -6   82.59    7.40
  -6   2   6   54.59   10.70
  -6   2   6   76.19    6.90
  -6  -2  -6   72.39   10.90
  -6  -2   6   95.09    8.40
  -6   2  -6   74.89   19.40
  -6   2  -6   65.99   11.90
  -6  -2   6   69.69   10.80
  -7   2   6   79.09    6.40
  -7   2   6   75.79    7.20
  -7  -2  -6   60.69   10.20
  -7   2   6   43.20    9.20
  -7   2  -6   49.40    9.90
  -7  -2   6   63.59   10.10
   0  -3  -6 3186.78  271.87
   0   3   6 3390.96  270.67
   0   3   6 3249.97  270.77
   0   3  -6 3694.33  270.97
   0   3  -6 3456.65  271.57
  -1   3   6 1493.45  126.09
  -1  -3  -6 1584.94  127.19
  -1   3   6 1534.65  125.99
   1   3  -6 1680.53  126.99
   1   3  -6 1592.04  126.39
  -1   3  -6 1729.53  126.29
  -1  -3   6 1405.26  126.59
   1   3   6 1604.34  125.99
  -2   3   6  622.44   50.39
  -2  -3  -6  670.43   51.99
  -2   3   6  621.64   50.49
   2   3  -6  698.93   51.59
  -2   3  -6  583.14   50.49
  -2  -3   6  584.94   51.19
  -3   3   6  281.07   23.30
  -3   3   6  277.67   23.20
  -3  -3  -6  264.87   25.20
   3   3  -6  331.77   25.00
  -3  -3   6  268.77   24.40
  -4  -3  -6  650.63   49.50
  -4  -3  -6  577.94   49.40
  -4   3   6  553.64   47.60
   4   3  -6  642.24   49.90
  -4  -3   6  601.84   48.90
  -4  -3   6  646.24   49.60
  -4   3  -6  580.84   57.39
  -4   3  -6  491.95   50.09
   5   3  -6   46.50    7.20
  -5   3   6   53.39    6.20
  -5  -3  -6   54.69    7.40
  -5   3   6   33.00    7.90
  -5  -3  -6   51.89    7.00
  -5  -3  -6   55.59    8.00
  -5  -3   6   55.99    7.90
  -5   3  -6   64.39   17.70
  -5   3  -6   42.30    9.00
  -5  -3   6   46.00    6.50
  -6  -3  -6   23.50    6.40
  -6   3   6   11.90    6.10
  -6   3   6   25.20    3.00
  -6  -3  -6   22.10    5.30
  -6   3   6   23.00    4.50
  -6   3  -6   18.50    6.90
  -6   3  -6   19.00   13.70
  -6  -3   6   31.10    4.90
  -6  -3   6   26.50    6.70
  -7   3   6    5.00    2.30
  -7  -3  -6    3.70    4.20
  -7   3   6    4.20    1.50
  -7  -3   6    4.10    4.40
  -7   3  -6    4.40    4.90
   0   4  -6  394.46   34.10
   0   4   6  431.66   33.10
   0   4   6  401.46   33.30
   0  -4  -6  369.46   34.80
   0   4  -6  454.15   33.60
   1   4  -6 1925.31  153.98
  -1   4   6 1865.41  153.58
  -1   4   6 1777.52  153.68
  -1  -4  -6 1951.00  154.98
   1   4  -6 2059.09  154.68
  -1   4  -6 2058.49  153.88
   1   4   6 1951.70  153.48
   1   4   6 1989.80  153.78
  -1  -4   6 1746.83  154.38
   2   4  -6  172.28   14.00
  -2   4   6  142.39   12.60
  -2  -4  -6  157.88   15.60
  -2   4   6  151.18   12.60
  -2   4  -6  151.88   12.80
  -2  -4   6  136.99   14.10
  -3  -4  -6 1223.58   91.09
   3   4  -6 1263.57   90.99
  -3   4   6 1050.29   89.09
  -3   4   6 1037.70   89.09
  -3   4  -6 1096.09   97.29
  -3   4  -6 1065.09   89.09
  -3  -4   6 1072.89   90.19
  -4  -4  -6  363.86   29.30
  -4  -4  -6  322.57   29.20
   4   4  -6  350.16   29.70
  -4   4   6  319.27   27.30
  -4  -4  -6  335.47   30.00
  -4   4   6  329.37   28.50
  -4   4  -6  325.77   38.50
  -4   4  -6  332.37   27.30
  -4  -4   6  323.27   28.90
  -4  -4   6  368.46   29.30
  -5  -4  -6   24.80    5.40
  -5   4   6   12.00    5.60
  -5  -4  -6   24.50    5.40
  -5  -4  -6   27.80    6.30
  -5   4   6   25.20    4.50
   5   4  -6   22.30    5.30
  -5   4  -6   19.00    6.70
  -5   4  -6   24.60    2.50
  -5   4  -6   20.60   13.40
  -5  -4   6   27.40    5.20
  -5  -4   6   28.40    4.90
  -5  -4   6   23.80    5.50
  -6  -4  -6  435.86   39.60
  -6  -4  -6  461.25   39.50
  -6   4   6  447.96   38.00
  -6  -4   6  538.75   38.70
  -6   4  -6  367.36   49.70
  -6  -4   6  424.96   39.60
  -7   4   6   16.00    2.70
  -7   4   6   15.10    2.10
  -7  -4  -6   20.40    5.70
  -7  -4   6   17.50    5.40
   0   5   6   46.10    4.00
   0   5  -6   39.60    5.50
   0   5   6   42.00    4.40
   0   5  -6   46.50    4.90
   0  -5  -6   56.49    7.70
   1   5  -6  571.34   46.40
  -1  -5  -6  610.64   48.10
  -1   5   6  539.85   46.00
   1   5  -6  603.84   47.20
  -1   5   6  542.35   45.90
  -1   5  -6  593.54   46.20
  -1  -5   6  530.45   47.10
   1   5   6  571.24   45.80
   1   5   6  585.64   46.20
  -2   5   6 1967.70  155.98
  -2  -5  -6 2048.99  157.88
  -2   5   6 1909.51  156.08
   2   5  -6 2067.19  157.48
  -2  -5   6 1843.02  157.18
  -2   5  -6 1888.91  156.08
   3   5  -6  188.28   16.30
  -3   5   6  169.18   15.60
  -3   5   6  169.48   14.20
  -3  -5  -6  200.38   18.00
  -3   5   6  165.18   14.20
  -3  -5   6  176.98   16.30
  -3   5  -6  151.38   16.50
  -3   5  -6  164.38   14.50
  -3   5  -6  173.98   25.90
   4   5  -6   64.79    8.60
  -4   5   6   62.49    6.20
  -4  -5  -6   69.69   10.50
  -4  -5  -6   66.99    8.70
  -4  -5  -6   67.09    8.10
  -4   5   6   68.89    8.20
  -4   5  -6   66.39    6.50
  -4  -5   6   68.19    8.40
  -4   5  -6   70.59   19.40
  -4  -5   6   67.89    9.30
  -4  -5   6   91.49    9.00
  -4   5  -6   87.19    8.60
  -5  -5  -6   77.69   10.10
  -5  -5  -6   60.79    8.50
  -5  -5  -6   57.99    8.80
  -5   5   6   67.29    7.90
  -5   5  -6   64.39    5.60
  -5   5  -6   36.00    9.40
  -5  -5   6   59.99    8.60
  -5  -5   6   72.79    8.30
  -5   5  -6   52.99   18.20
  -5  -5   6   56.89    8.50
  -6  -5  -6  144.69   16.10
  -6   5   6  150.38   14.30
  -6  -5  -6  142.99   15.80
  -6  -5   6  153.08   16.10
  -6  -5   6  170.68   15.00
  -7  -5  -6    3.90    4.00
  -7  -5   6    2.50    2.30
  -7  -5   6    1.40    3.90
   0   6  -6  929.61   73.49
   0   6   6  899.21   72.99
   0   6   6  906.01   73.29
  -1  -6  -6  561.64   48.80
  -1   6   6  575.94   46.40
   1   6  -6  585.64   47.80
  -1   6   6  584.94   46.60
   1   6  -6  574.94   47.00
   1   6   6  583.64   46.80
  -1  -6   6  509.25   47.80
   1   6   6  601.34   46.30
  -1   6  -6  593.94   46.80
  -2   6   6  352.66   28.50
  -2  -6  -6  368.56   31.40
   2   6  -6  380.36   30.20
  -2   6   6  346.07   28.40
  -2   6  -6  325.07   28.60
  -2  -6   6  320.87   30.20
  -3   6   6  371.76   29.90
  -3   6   6  396.66   30.00
   3   6  -6  402.06   32.20
   3   6  -6  321.37   34.80
  -3  -6  -6  422.56   33.30
  -3   6  -6  365.06   30.30
  -3   6  -6  318.57   29.90
  -3  -6   6  366.26   32.00
  -3   6  -6  369.86   32.60
  -3   6  -6  326.87   41.10
   3   6   6  359.66   33.90
  -4  -6  -6   97.99   12.90
  -4  -6  -6   84.59    9.40
   4   6  -6  100.59   15.80
  -4   6   6   73.89    7.30
  -4  -6  -6   78.69   10.20
  -4   6   6   85.19    9.60
   4   6  -6   84.99   10.20
  -4   6  -6   65.99   19.30
  -4   6  -6   82.39    7.70
  -4  -6   6   79.79   10.80
  -4  -6   6   93.89    9.70
  -5  -6  -6  781.12   71.19
  -5  -6  -6  790.62   71.09
  -5  -6  -6  877.01   70.69
  -5   6   6  832.62   69.89
  -5  -6   6  757.52   70.09
  -5  -6   6  945.71   70.69
  -5   6  -6  940.31   68.49
  -5  -6   6  849.02   70.59
  -6  -6  -6    5.30    4.30
  -6   6   6    5.50    3.00
  -6  -6  -6    7.30    4.50
  -6   6   6    7.70    1.90
  -6  -6   6    7.10    4.50
  -6  -6   6    6.10    3.30
  -7  -6  -6   43.50    7.10
  -7  -6   6   46.50    5.90
  -7  -6   6   41.80    7.00
   0   7   6    4.20    1.90
   0   7  -6    3.20    2.20
   0   7   6    4.60    1.50
  -1  -7  -6  514.15   48.70
   1   7  -6  557.94   47.90
   1   7  -6  547.35   47.00
  -1   7   6  610.44   46.70
  -1   7   6  605.04   46.40
  -1   7  -6  581.34   46.80
   1   7   6  568.84   46.80
   1   7   6  592.14   49.00
  -1  -7   6  577.44   46.80
   2   7  -6  441.56   37.70
   2   7  -6  363.46   39.90
  -2  -7  -6  430.46   38.80
  -2   7   6  435.96   35.90
  -2   7   6  454.85   36.10
  -2  -7  -6  515.95   38.10
  -2   7  -6  423.26   36.20
  -2  -7   6  474.15   36.40
   2   7   6  459.35   39.30
  -2  -7   6  427.26   38.10
  -2   7  -6  401.86   39.10
  -3   7   6   15.80    2.60
  -3  -7  -6   24.40    7.60
  -3   7   6   15.80    2.70
   3   7  -6   27.10    9.70
   3   7  -6   14.20    4.50
  -3   7  -6   17.40    3.10
  -3   7  -6   18.60    5.80
   3   7   6   25.10    7.90
  -3  -7   6   22.10    6.30
   4   7  -6  471.55   41.60
  -4  -7  -6  464.35   42.50
   4   7  -6  421.26   45.10
  -4   7   6  484.05   38.70
  -4   7  -6  476.25   39.10
  -4  -7   6  456.35   41.10
   4   7   6  484.25   43.50
  -4  -7   6  521.55   40.70
  -5   7   6  132.29   14.00
  -5  -7  -6  144.19   14.60
  -5  -7  -6  165.28   17.40
   5   7  -6  154.48   22.80
  -5  -7  -6  127.79   15.60
  -5   7  -6  147.79   12.20
  -5  -7   6  140.49   14.40
  -5  -7   6  141.99   15.40
  -5  -7   6  135.09   14.70
  -6   7   6   82.89    9.80
  -6   7   6  122.09    9.10
  -6  -7  -6   81.39   12.50
  -6  -7   6   81.89   11.60
  -6   7  -6  116.29    8.50
  -6  -7   6   90.89   10.90
  -7  -7  -6   26.40    5.30
  -7  -7   6   26.00    4.30
   0   8   6  468.95   37.80
   0   8  -6  480.95   38.10
   0  -8   6  450.25   37.70
   0  -8  -6  445.46   38.20
   0   8  -6  429.06   40.20
   0   8   6  480.25   39.80
  -1   8   6 1560.94  128.39
   1   8  -6 1502.85  131.69
   1   8  -6 1550.34  129.09
  -1   8   6 1748.33  128.89
   1  -8   6 1440.76  128.69
  -1  -8  -6 1524.35  130.89
   1  -8  -6 1459.35  129.19
  -1   8  -6 1685.03  129.09
   1   8   6 1770.92  129.09
  -1   8  -6 1595.74  135.69
  -1  -8   6 1725.83  128.99
   1   8   6 1680.63  131.09
   2   8  -6  870.21   77.29
  -2   8   6  993.00   75.79
   2   8  -6  779.62   79.09
  -2  -8  -6 1105.49   77.79
  -2  -8  -6  885.01   78.19
   2   8   6  915.01   78.49
  -2  -8   6  920.91   77.79
  -2  -8   6 1025.70   76.09
  -2   8  -6  912.31   79.09
  -2   8  -6  926.71   75.89
   3   8  -6  215.48   21.20
   3   8  -6  199.68   25.40
  -3  -8  -6  229.38   23.30
  -3   8   6  232.08   18.90
  -3  -8   6  217.38   19.30
  -3  -8   6  204.48   21.90
   3   8   6  218.88   23.60
  -3   8  -6  203.38   18.90
  -3   8  -6  279.07   23.70
   4   8  -6   60.19   15.10
  -4  -8  -6   77.79   12.50
  -4   8   6   65.29    6.80
  -4   8  -6   69.79    7.20
   4   8   6   72.09   13.30
  -4  -8   6   72.39    9.20
  -4  -8   6   60.29   10.40
  -5  -8  -6   83.19   13.80
  -5  -8  -6   69.39    9.40
   5   8  -6   80.99   15.80
  -5  -8  -6   66.09   10.90
  -5  -8   6   63.99    9.60
  -5  -8   6   57.29    8.90
  -5   8  -6   69.69    6.60
   5   8   6   88.99   13.80
  -5  -8   6   72.99   13.60
  -6  -8  -6   22.20    5.60
  -6   8   6   24.30    4.10
  -6  -8  -6   26.30    6.60
  -6   8  -6   25.50    2.50
  -6  -8   6   26.60    6.00
  -6   8  -6   29.40    2.80
  -6  -8   6   17.10    4.80
   0  -9  -6   65.39    7.90
   0   9  -6   69.59    8.00
   0   9  -6   69.59   10.70
   0  -9   6   64.59    7.20
   0   9   6   64.09    7.40
   0   9   6   73.29   10.60
   0  -9  -6   75.29   10.30
   1  -9   6  165.08   16.20
  -1   9   6  193.28   16.50
   1   9  -6  168.68   21.40
   1   9  -6  166.88   16.90
  -1  -9  -6  230.68   19.20
   1  -9  -6  232.98   19.40
   1   9   6  195.28   16.70
  -1  -9   6  184.48   16.50
   1  -9  -6  158.78   16.80
  -1   9  -6  190.18   16.80
   1   9   6  188.98   19.90
  -2  -9  -6   44.80   10.10
  -2  -9  -6   47.90    7.90
   2   9  -6   49.70   11.50
  -2   9   6   40.50    5.50
  -2   9  -6   44.10   10.00
  -2  -9   6   34.70    5.40
  -2  -9   6   39.50    9.20
  -2   9  -6   42.20    5.90
   2   9   6   49.50    9.90
   3   9  -6   82.09   15.50
   3   9  -6   68.09   10.20
  -3  -9  -6   80.79   12.40
   3   9   6   95.99   13.80
  -3   9  -6   63.89    7.80
  -3  -9   6   79.49   11.70
  -3  -9   6   76.29    9.20
   4   9  -6   59.79   14.50
  -4  -9  -6   62.39   11.80
  -4  -9   6   55.59    8.80
  -4  -9   6   60.29   10.40
   4   9   6   54.89   12.10
  -5  -9  -6   22.70    5.60
   5   9  -6   22.00   11.10
  -5  -9   6   29.50    6.40
  -5   9  -6   29.10    3.60
   5   9   6   29.30    9.50
  -6  -9  -6   58.49    8.40
  -6   9   6   55.29    6.40
  -6  -9  -6   46.40    9.00
   6   9  -6   70.19   12.30
  -6   9  -6   79.69    5.50
  -6  -9   6   53.29    8.10
  -6  -9   6   59.99    8.50
   0 -10  -6    3.80    5.20
   0  10   6    7.20    5.00
   0  10   6    0.50    2.70
   0  10  -6   -1.60    3.10
   0 -10   6    2.20    2.60
   1 -10   6   93.29   10.00
  -1 -10  -6  134.29   14.00
   1  10  -6   86.69   14.50
   1  10  -6   91.49   11.00
  -1  10   6  102.79   10.30
   1  10   6  111.69   14.70
   1 -10  -6  115.89   13.70
  -1 -10   6  102.09   10.40
  -1  10  -6   91.59   10.70
   1  10   6  101.99   12.50
   2  10  -6  279.87   30.40
  -2  10   6  275.17   23.90
  -2 -10  -6  249.18   27.60
  -2 -10  -6  301.87   26.50
   2  10   6  288.97   28.10
  -2  10  -6  230.78   23.90
  -2  10  -6  350.26   30.10
  -2 -10   6  279.57   24.30
   3  10  -6  435.16   40.70
  -3 -10  -6  385.26   37.30
  -3  10   6  422.06   33.40
   3  10   6  430.86   38.40
  -3 -10   6  379.66   34.60
  -3 -10   6  476.05   36.60
  -3  10  -6  331.67   33.30
  -3 -10   6  384.96   36.60
   4  10  -6  383.36   42.60
  -4 -10   6  467.15   37.80
   4  10   6  415.36   40.70
  -5 -10  -6   15.40    4.70
   5  10  -6   16.40    9.10
  -5  10  -6   11.40    2.30
   5  10   6   15.10    7.50
  -5 -10   6   13.10    5.10
  -6 -10  -6    1.20    3.80
   0 -11   6  973.00   79.49
   0  11  -6  935.01   79.79
   0  11   6 1016.30   79.69
   1 -11   6  109.19   11.20
  -1  11   6  102.69   11.20
  -1 -11  -6  123.09   14.70
   1  11  -6  114.39   16.80
   1  11  -6   99.59   12.30
  -1 -11   6  104.99   11.40
   1  11   6  112.29   14.90
  -1  11  -6  105.49   11.90
   1 -11  -6  147.69   15.10
   2  11  -6  548.35   50.09
  -2 -11  -6  577.04   47.50
  -2  11   6  517.55   44.90
   2  11   6  566.24   48.30
   2 -11  -6  625.74   48.10
  -2 -11   6  515.15   45.10
  -2  11  -6  477.15   45.00
   3  11  -6  146.79   20.30
  -3  11   6  102.79   12.40
   3  11   6  131.39   17.40
   4  11  -6  113.49   17.90
  -4 -11  -6  110.29   12.30
   4  11   6  105.09   16.50
  -4 -11   6  131.89   13.30
  -5 -11  -6  109.09   11.90
   5  11  -6  128.39   17.40
   5  11   6  108.29   14.50
  -5 -11   6  127.79   12.40
   0 -12  -6    0.70    5.90
   0  12   6   -0.50    3.50
   0 -12   6    4.00    3.40
   0  12  -6    1.40    4.20
  -1 -12  -6   41.10    8.70
   1 -12   6   37.00    5.90
  -1  12   6   32.60    5.80
  -1 -12   6   33.30    5.90
  -1  12  -6   35.20    6.40
   1 -12  -6   41.00    9.10
   1  12   6   34.40    7.90
  -2 -12  -6   10.90    6.50
   2  12  -6    9.80    8.60
   2 -12   6   12.80    4.90
  -2 -12   6   11.60    3.90
   2  12   6   16.30    6.90
   2 -12  -6   18.10    7.70
   3  12  -6   21.80    9.80
   3  12   6   25.00    8.00
  -4 -12  -6   52.49    7.40
   4  12  -6   50.09   11.10
   4  12   6   41.30    9.10
  -4 -12   6   50.39    7.90
   0 -13  -6   15.30    6.90
   0 -13   6   12.50    4.10
   1 -13   6   65.49    8.50
  -1 -13  -6   79.59   11.80
   1 -13  -6   86.29   12.40
  -1 -13   6   63.39    8.30
  -2 -13  -6   82.09   12.30
   2 -13   6   76.79    9.30
   2  13   6   75.99   11.10
  -2 -13   6   94.39   11.30
   2 -13  -6   78.89   12.40
   3  13  -6   27.30    8.30
   3  13   6   30.00    6.90
  -4 -13  -6    7.20    3.30
   4  13   6    7.20    7.30
   0 -14  -6   55.19    9.80
   0 -14   6   79.79   11.10
   0 -14   6   57.69    7.60
  -1 -14  -6    4.70    5.90
   1 -14   6   -1.30    2.90
  -1 -14   6    1.30    2.70
   1 -14  -6    6.90    6.10
  -1 -14   6   -1.30    4.80
   2 -14   6    1.40    5.50
   2 -14   6    3.50    3.20
   2 -14  -6    3.90    6.20
  -3 -14  -6   23.60    4.50
   0 -15  -6    4.50    5.70
   0 -15   6    7.30    4.70
  -1   0  -7  410.06   29.50
   1   0  -7  322.17   29.40
  -1   0   7  348.87   29.10
  -2   0   7 1196.68  101.89
  -2   0  -7 1273.77  102.49
  -2   0   7 1299.67  102.29
   2   0  -7 1335.87  102.79
  -3   0   7    2.90    2.10
  -3   0  -7    1.70    3.20
   3   0  -7    1.60    1.70
  -4   0  -7   52.29    5.90
  -4   0  -7   62.89    7.30
  -4   0   7   62.09    6.30
   4   0  -7   64.19    7.20
  -4   0  -7   70.99    9.00
  -5   0  -7  208.88   19.70
  -5   0   7  185.28   18.90
  -5   0  -7  190.28   16.70
  -6   0  -7   76.39   11.80
  -6   0  -7   81.09    8.20
  -6   0   7   71.09   11.50
  -6   0  -7   92.49   19.90
  -7   0   7  117.59   11.30
  -7   0  -7   99.39   13.50
  -7   0  -7  131.39   10.50
  -7   0   7   91.19   13.00
   0   1  -7 3883.91  310.37
  -1  -1  -7 3769.52  282.77
  -1   1   7 3507.65  282.27
  -1   1   7 3418.76  282.07
   1   1  -7 3446.36  282.87
  -1  -1   7 3564.24  282.47
   2   1  -7  475.75   36.90
  -2   1   7  421.96   35.90
  -2  -1  -7  493.75   37.10
  -2   1   7  458.15   36.20
  -2  -1   7  441.56   36.50
   2   1   7  410.46   35.80
   2  -1  -7  432.56   36.60
  -2   1  -7  457.95   36.50
  -3   1   7  116.39   11.00
  -3   1   7  149.99   11.60
   3   1  -7  151.38   12.60
  -3  -1  -7  121.79   13.10
  -3  -1   7  136.59   12.00
  -3   1  -7  119.39   12.10
   3  -1  -7  136.79   12.10
   4   1  -7  166.98   15.30
  -4  -1  -7  140.09   14.10
  -4   1   7  176.68   13.80
  -4   1   7  147.39   16.00
  -4  -1  -7  200.18   16.00
  -4  -1  -7  136.39   14.60
  -4  -1  -7  183.78   15.30
  -4   1  -7  148.69   13.60
  -4   1  -7  154.58   15.00
  -4   1  -7  175.88   16.50
  -4  -1   7  178.48   14.50
  -5   1   7   70.79   11.10
   5   1  -7   92.29   10.30
  -5  -1  -7  100.89   10.30
  -5  -1  -7  101.79   11.50
  -5   1  -7   88.99    8.40
  -5  -1   7   96.69    8.70
  -5  -1   7   83.39   10.90
  -5   1  -7   86.49   11.60
  -6   1   7   67.09   11.50
  -6  -1  -7   93.49   12.20
  -6  -1  -7   84.39    8.90
  -6   1  -7   90.79    8.20
  -6   1  -7   81.69   12.40
  -6  -1   7   71.29   11.40
  -6   1  -7   85.59   20.20
  -7  -1  -7  138.59   15.60
  -7  -1  -7  143.39   12.60
  -7   1   7  162.28   12.20
  -7   1   7  160.48   13.00
  -7   1   7  103.29   14.50
  -7  -1   7  111.99   14.70
  -7   1  -7  112.39   15.20
   0   2   7  122.89    9.80
   0   2   7  109.49    9.90
   0   2  -7  124.29   11.00
   0   2  -7  117.99   10.20
  -1   2   7 3093.79  254.87
   1   2  -7 3277.87  255.67
  -1   2   7 3103.79  254.77
  -1  -2  -7 3465.95  255.67
  -1  -2   7 3040.50  255.27
  -1   2  -7 3183.38  254.97
   1   2   7 3221.88  254.67
  -2   2   7  184.98   14.50
   2   2  -7  195.18   15.50
  -2   2   7  176.28   14.20
  -2  -2  -7  174.78   16.20
   2  -2  -7  149.99   14.80
  -2  -2   7  163.28   15.10
  -3  -2  -7 1084.19   88.59
  -3   2   7 1014.40   87.29
   3   2  -7 1227.38   88.89
  -3   2   7 1149.78   87.49
  -3  -2   7 1070.29   87.99
  -3   2  -7 1004.70   87.59
  -4   2   7  103.99    8.70
   4   2  -7  102.39   10.50
  -4  -2  -7  113.09   10.90
  -4  -2  -7  111.89   10.50
  -4  -2   7   99.79   10.50
  -4   2  -7   90.39   11.30
  -4   2  -7   85.99    8.60
  -4  -2   7  114.89   10.20
   5   2  -7  369.16   31.90
  -5  -2  -7  400.36   31.70
  -5  -2  -7  404.86   32.40
  -5   2  -7  294.17   32.40
  -5   2  -7  326.77   29.50
  -5  -2   7  376.06   32.10
  -5   2  -7  341.17   41.70
  -5  -2   7  372.96   30.10
  -6  -2  -7  793.92   64.29
  -6   2   7  771.22   62.19
  -6   2   7  822.22   61.19
  -6   2  -7  701.63   73.29
  -6  -2   7  754.42   63.99
  -6   2  -7  798.72   61.09
  -6   2  -7  609.74   64.09
  -7   2   7   30.00    7.50
  -7   2   7   47.50    5.90
  -7  -2  -7   51.59    8.70
  -7   2   7   53.09    5.00
  -7   2  -7   42.80   15.40
  -7  -2   7   46.80    8.30
  -7   2  -7   45.90    9.10
   0   3   7  140.79   12.60
   0   3   7  163.38   12.40
   0  -3  -7  126.39   14.50
   0   3  -7  163.68   13.00
   0   3  -7  152.28   13.60
  -1   3   7 4317.27  354.56
   1   3  -7 4730.03  355.56
  -1   3   7 4320.27  354.46
  -1  -3  -7 4590.24  355.56
   1   3  -7 4256.67  354.76
  -1   3  -7 4778.42  354.66
   1   3   7 4425.46  354.36
  -1  -3   7 4177.68  355.06
  -2   3   7  592.74   48.70
  -2   3   7  574.04   48.60
  -2  -3  -7  633.94   50.19
   2   3  -7  670.63   49.90
  -2  -3   7  561.84   49.40
  -3   3   7  787.52   65.79
  -3  -3  -7  817.32   67.49
  -3   3   7  821.62   65.89
   3   3  -7  914.61   67.59
  -3   3  -7  799.42   66.09
  -3  -3   7  801.62   66.79
  -3   3  -7  816.42   73.29
  -3   3  -7  810.52   65.79
  -4  -3  -7   39.20    7.00
   4   3  -7   45.90    6.40
  -4   3   7   49.80    4.30
  -4  -3  -7   48.80    6.60
  -4  -3  -7   48.10    6.50
  -4   3  -7   45.10    4.00
  -4   3  -7   41.00    4.50
  -4  -3   7   38.50    6.00
  -4   3  -7   37.20   13.00
  -4  -3   7   45.10    6.30
  -4   3  -7   41.00    7.90
  -5  -3  -7  189.18   16.80
  -5  -3  -7  183.58   17.00
  -5   3   7  152.88   15.20
  -5  -3  -7  142.89   15.80
  -5   3  -7  165.28   14.20
  -5   3  -7  158.28   28.10
  -5  -3   7  176.18   16.70
  -5  -3   7  160.48   15.30
  -6   3   7   38.90    3.90
  -6  -3  -7   31.60    6.20
  -6   3   7   32.50    5.50
  -6  -3  -7   33.70    7.40
  -6   3   7   20.60    7.10
  -6  -3   7   42.60    5.70
  -6  -3   7   35.80    7.50
  -6   3  -7   25.60   14.30
  -6   3  -7   25.80    7.90
  -7  -3  -7   16.50    5.40
  -7   3   7   17.40    3.30
  -7   3   7   19.00    2.60
  -7   3  -7    1.10   12.00
  -7   3  -7    9.40    5.40
  -7  -3   7   14.90    5.50
   0   4   7  948.61   73.79
   0   4   7  893.21   73.89
   0   4  -7  952.90   74.19
   0   4  -7  897.31   74.89
  -1   4   7  792.22   65.79
  -1  -4  -7  869.01   67.49
   1   4  -7  870.21   67.09
  -1   4   7  781.32   65.89
   1   4  -7  827.42   66.29
   1   4   7  803.92   65.99
  -1  -4   7  759.22   66.69
  -1   4  -7  881.71   66.09
   1   4   7  817.52   65.69
  -2   4   7  740.83   59.89
  -2  -4  -7  808.52   61.79
  -2   4   7  735.93   59.79
   2   4  -7  824.92   61.39
  -2   4  -7  683.33   59.99
  -2  -4   7  692.53   60.79
  -3   4   7  850.61   71.69
   3   4  -7 1006.50   73.69
  -3  -4  -7  892.71   73.59
  -3   4   7  858.81   71.59
  -3  -4   7  911.21   72.89
  -3   4  -7  836.32   79.79
  -3   4  -7  889.91   71.69
   4   4  -7  248.38   23.00
  -4  -4  -7  261.67   23.80
  -4   4   7  242.18   20.70
  -4  -4  -7  285.77   22.80
  -4  -4  -7  240.98   22.80
  -4   4   7  241.58   22.00
  -4   4  -7  250.97   20.70
  -4  -4   7  246.78   22.40
  -4   4  -7  240.28   32.60
  -4  -4   7  276.37   22.70
  -5  -4  -7    8.60    4.00
  -5  -4  -7    9.70    4.10
  -5   4   7    1.80    4.30
  -5   4   7    6.40    3.20
   5   4  -7    8.50    3.70
  -5  -4  -7    6.20    5.20
  -5   4  -7    7.30    5.20
  -5  -4   7   11.50    4.40
  -5   4  -7    9.70    1.40
  -5  -4   7    9.60    4.10
  -5   4  -7    7.60   12.60
  -5  -4   7   14.40    3.90
  -6   4   7   39.50    3.90
  -6  -4  -7   33.10    6.80
  -6  -4  -7   35.40    7.00
  -6   4   7   20.00    6.90
  -6   4   7   37.40    5.70
  -6   4  -7   27.00    7.90
  -6  -4   7   36.40    5.70
  -6  -4   7   36.70    7.10
  -6  -4   7   23.10    4.90
  -6   4  -7   33.50   16.10
  -7  -4  -7   79.69   10.80
  -7   4   7   95.19    8.50
  -7  -4   7   83.09   11.00
  -7  -4   7   96.49    8.70
   0   5  -7  470.05   42.90
   0   5   7  521.15   42.00
   0   5   7  548.35   41.80
   0  -5  -7  495.45   43.70
   0   5  -7  557.64   42.30
   1   5  -7  323.67   26.40
  -1  -5  -7  302.27   27.40
  -1   5   7  293.77   25.00
  -1   5   7  287.17   24.80
   1   5  -7  300.97   25.50
  -1  -5   7  283.27   26.20
   1   5   7  312.27   24.70
   1   5   7  313.77   25.20
  -1   5  -7  330.37   25.30
  -2   5   7  477.95   38.00
  -2  -5  -7  459.65   40.40
  -2   5   7  470.05   38.10
   2   5  -7  522.85   39.70
  -2  -5   7  434.36   39.30
  -2   5  -7  449.16   38.20
  -3   5   7    2.90    1.30
  -3  -5  -7    1.60    5.30
   3   5  -7    3.50    2.60
  -3   5   7    2.00    1.20
   3   5  -7   10.80    8.20
  -3  -5   7    2.50    3.60
  -3   5  -7    3.10    3.90
  -3   5  -7    0.20    8.90
  -3   5  -7    1.60    1.30
  -4   5   7   39.00    6.30
  -4  -5  -7   33.20    8.00
  -4   5   7   44.10    4.20
  -4  -5  -7   40.70    6.20
  -4  -5  -7   44.40    7.20
   4   5  -7   45.00    6.80
  -4  -5   7   42.70    6.50
  -4   5  -7   29.00    7.40
  -4   5  -7   39.00    4.20
  -4   5  -7   38.90   16.10
  -4   5  -7   41.30    6.80
  -4  -5   7   56.79    7.10
  -4  -5   7   34.50    6.50
  -5  -5  -7  339.17   30.70
  -5   5   7  332.87   30.00
  -5  -5  -7  324.67   31.20
  -5  -5  -7  343.87   31.40
  -5   5  -7  290.07   42.80
  -5  -5   7  336.57   30.70
  -5  -5   7  294.77   30.00
  -5   5  -7  392.26   28.30
  -5  -5   7  414.06   30.90
  -6   5   7   54.39    7.20
  -6  -5  -7   57.79    9.30
  -6  -5  -7   53.19    8.70
  -6  -5   7   51.19    8.90
  -6  -5   7   60.19    7.40
  -7   5   7   46.30    4.10
  -7   5   7   42.90    4.60
  -7  -5  -7   39.10    7.10
  -7  -5   7   47.80    5.70
  -7  -5   7   43.40    7.40
   0   6   7 6046.59  483.85
   0   6  -7 6203.38  484.35
   0   6   7 5969.80  484.15
  -1  -6  -7  106.89   13.80
   1   6  -7  120.49   11.70
   1   6  -7  110.79   10.80
  -1   6   7  119.49   10.20
  -1   6   7  117.39    9.90
   1   6   7  120.39   10.40
  -1   6  -7  116.19   10.50
   1   6   7  118.39    9.80
  -1  -6   7  102.79   12.20
   2   6  -7  180.08   16.40
  -2   6   7  180.78   14.70
  -2   6   7  171.78   14.50
  -2  -6  -7  176.58   18.40
   2   6  -7  148.99   19.90
  -2   6  -7  148.39   18.60
  -2   6  -7  164.28   14.90
  -2  -6   7  175.58   16.90
  -2  -6   7  192.78   15.40
   3   6  -7  100.19   10.80
  -3   6   7   85.59    8.40
  -3   6   7   94.59    8.50
  -3  -6  -7  115.89   13.60
   3   6  -7   98.09   15.80
  -3   6  -7   88.09    8.70
  -3   6  -7   94.99    8.80
  -3   6  -7  107.79   12.40
  -3   6  -7   86.89   20.80
   3   6   7  110.49   14.40
  -3  -6   7  102.49   11.50
  -4   6   7   27.70    3.50
  -4   6   7   33.30    5.80
  -4  -6  -7   26.70    8.20
   4   6  -7   32.30    6.30
  -4  -6  -7   29.90    6.40
   4   6  -7   26.10   11.10
  -4  -6  -7   24.00    4.90
  -4  -6   7   36.00    6.00
  -4  -6   7   21.60    6.30
  -4   6  -7   34.20   15.60
  -4   6  -7   34.90    6.10
  -4   6  -7   27.70    3.60
  -5   6   7   20.80    4.90
  -5  -6  -7   26.20    7.60
  -5  -6  -7   22.10    5.60
  -5  -6  -7   17.20    5.50
  -5  -6   7   20.20    4.80
  -5  -6   7   25.80    5.60
  -5   6  -7   20.70    2.80
  -5  -6   7   20.50    5.90
  -6   6   7   25.90    5.00
  -6  -6  -7   24.20    6.10
  -6   6   7   46.80    5.20
  -6  -6  -7   23.30    6.40
  -6  -6   7   21.40    6.00
  -6  -6   7   24.80    5.20
  -6   6  -7   35.40    3.00
  -7  -6  -7    9.60    4.40
  -7  -6   7   10.80    4.50
  -7  -6   7    9.80    2.90
   0   7   7    3.60    1.30
   0   7  -7    6.70    2.50
   0   7   7    6.40    2.10
  -1  -7  -7  103.29   13.00
   1   7  -7   94.59    9.90
  -1   7   7   99.39    8.90
  -1  -7  -7  125.39   11.80
   1   7  -7   95.19   10.80
  -1   7   7  101.89    9.30
   1   7  -7   85.09   13.60
   1   7   7  106.69    8.80
  -1  -7   7   97.69    9.40
   1   7   7  108.89   12.90
   1   7   7  106.69   11.40
  -1   7  -7  104.19    9.80
  -2  -7  -7  118.69   12.10
   2   7  -7   85.79   14.50
   2   7  -7  111.09   11.50
  -2   7   7  103.99    9.60
  -2   7   7  105.19    9.30
  -2  -7  -7  105.89   14.10
  -2  -7   7  114.79   10.00
  -2  -7   7  107.19   12.80
   2   7   7  112.79   14.10
  -2   7  -7   94.09   13.90
  -2   7  -7   92.69    9.80
   3   7  -7  164.98   15.80
  -3   7   7  162.78   13.30
  -3   7   7  147.89   13.20
  -3  -7  -7  154.88   17.70
   3   7  -7  148.09   20.20
  -3  -7   7  146.79   15.10
   3   7   7  158.38   18.30
  -3   7  -7  136.89   13.30
  -3   7  -7  161.78   17.20
  -3  -7   7  156.58   16.20
  -4   7   7  534.15   43.50
   4   7  -7  470.05   49.99
  -4  -7  -7  548.55   45.40
   4   7  -7  508.15   46.40
  -4  -7  -7  547.85   47.40
  -4   7  -7  543.05   43.90
  -4  -7   7  509.05   45.80
   4   7   7  557.04   48.50
  -4  -7   7  590.54   45.50
  -5  -7  -7  287.67   30.30
  -5  -7  -7  322.07   31.00
  -5   7   7  304.57   28.80
  -5  -7  -7  339.67   29.40
   5   7  -7  287.97   35.00
  -5  -7   7  314.67   29.50
  -5   7  -7  386.66   27.30
  -5  -7   7  344.97   29.60
  -5  -7   7  334.37   29.40
  -6  -7  -7  216.58   21.00
  -6  -7  -7  223.58   22.30
  -6   7   7  226.48   19.70
  -6  -7   7  216.28   21.10
  -6  -7   7  238.08   20.70
  -7  -7  -7    5.60    3.80
   0  -8   7  525.35   44.00
   0   8  -7  508.95   46.60
   0   8   7  508.95   43.60
   0   8   7  556.24   44.20
   0   8   7  557.44   45.90
   0   8  -7  577.24   44.50
   1   8  -7   51.49   11.30
   1  -8   7   52.49    5.90
  -1   8   7   58.59    6.30
   1   8  -7   51.79    7.10
  -1  -8  -7   56.49   10.10
  -1   8   7   51.79    5.60
  -1  -8  -7   64.79    9.00
   1   8   7   61.49    6.70
  -1  -8   7   59.69    6.30
   1  -8  -7   67.49    9.70
   1  -8  -7   55.59    6.90
   1   8   7   62.09    9.60
  -1   8  -7   55.09    6.80
  -2  -8  -7  987.20   72.19
   2   8  -7  721.43   73.79
  -2   8   7  919.21   70.19
  -2   8   7  878.01   69.89
  -2  -8  -7  814.12   72.69
   2   8  -7  837.22   71.99
  -2   8  -7  824.62   70.19
  -2  -8   7  863.51   72.29
   2   8   7  891.21   73.09
  -2  -8   7  929.31   70.49
  -2   8  -7  832.42   73.69
   3   8  -7   96.59   17.90
  -3   8   7  132.69   11.40
  -3  -8  -7  128.59   16.80
   3   8  -7  123.69   14.00
  -3  -8   7  125.49   15.10
  -3   8  -7  144.69   16.50
   3   8   7  139.19   17.40
  -3   8  -7  106.99   11.40
  -3  -8   7  131.79   11.90
  -4   8   7   42.00    4.70
  -4  -8  -7   44.50    9.90
   4   8  -7   30.50   12.30
  -4   8  -7   35.70    4.70
  -4  -8   7   35.40    6.50
  -4  -8   7   34.40    7.70
   4   8   7   46.50   11.00
  -5  -8  -7  444.76   38.10
  -5  -8  -7  386.96   39.30
   5   8  -7  397.56   43.10
  -5   8  -7  482.95   36.00
  -5  -8   7  443.46   38.20
   5   8   7  460.85   41.30
  -6  -8  -7   18.60    6.20
  -6  -8  -7   21.80    5.40
  -6   8   7   17.40    3.70
   6   8  -7   21.50   10.70
  -6   8  -7   24.70    2.40
  -6   8  -7   27.30    2.60
  -6  -8   7   24.80    5.90
  -6  -8   7   12.20    4.30
   0   9   7  167.58   15.40
   0  -9   7  160.38   15.20
   0   9  -7  182.98   19.00
   0  -9  -7  198.58   18.10
   0   9   7  174.68   17.60
   0   9  -7  167.18   15.80
   1   9  -7  552.04   46.50
   1   9  -7  507.75   49.60
  -1   9   7  598.24   46.20
  -1  -9  -7  651.63   48.40
   1  -9   7  501.75   45.80
   1   9   7  576.14   46.30
   1   9   7  563.44   48.60
  -1  -9   7  557.74   46.10
  -1   9  -7  541.35   46.30
   2   9  -7   59.49   13.00
  -2  -9  -7   79.79   12.40
  -2   9   7   64.49    7.20
  -2  -9  -7   75.29   10.60
  -2   9  -7   62.99    7.70
  -2  -9   7   65.39    7.60
   2   9   7   62.59   11.10
  -2   9  -7   70.59   12.50
  -2  -9   7   61.59   10.70
  -3  -9  -7   15.10    7.90
   3   9  -7    3.70    4.80
  -3   9   7    5.70    2.30
   3   9  -7    3.50    9.30
  -3   9  -7   -0.20    2.60
   3   9   7    8.10    7.60
  -3   9  -7    9.20    6.70
  -3  -9   7    3.50    6.50
  -4  -9  -7  226.68   25.10
   4   9  -7  246.68   30.00
   4   9   7  250.77   26.60
  -4  -9   7  273.57   23.00
  -4  -9   7  206.28   23.70
  -5  -9  -7   13.60    4.70
   5   9  -7   22.40   10.80
  -5  -9   7   15.00    5.20
   5   9   7   20.70    8.30
  -5   9  -7   16.50    2.60
  -6  -9  -7   11.50    5.30
   6   9  -7   13.00    8.10
  -6  -9  -7   14.80    4.50
  -6   9  -7   15.20    1.80
  -6   9  -7   16.70    1.90
  -6  -9   7   10.80    3.90
   0  10  -7  289.87   27.10
   0 -10   7  286.07   26.60
   0  10   7  315.97   28.40
   0 -10  -7  385.16   29.90
   0  10   7  316.87   26.90
   1  10  -7  271.87   29.00
  -1 -10  -7  330.67   27.30
   1 -10   7  261.27   24.10
   1  10  -7  262.87   24.90
  -1  10   7  278.37   24.30
  -1  10  -7  265.47   24.70
   1  10   7  282.17   27.30
  -1 -10   7  291.77   24.50
   1 -10  -7  316.57   27.10
  -2  10   7  120.99   11.30
  -2 -10  -7   98.59   15.30
   2  10  -7  116.99   17.80
  -2 -10  -7  122.09   14.60
  -2  10  -7  133.49   18.10
  -2  10  -7  115.79   11.70
  -2 -10   7  117.49   11.70
   2  10   7   93.69   15.00
  -3 -10  -7   43.70   10.30
   3  10  -7   50.99   13.60
  -3  10  -7   70.19   12.00
   3  10   7   54.79   11.30
  -3 -10   7   42.00    9.60
  -3 -10   7   43.50    7.80
  -4 -10  -7  105.69   12.10
   4  10  -7  107.09   18.30
  -4 -10   7  108.59   12.50
   4  10   7  114.19   17.10
   5  10  -7   62.29   12.40
  -5 -10  -7   46.10    7.50
  -5  10  -7   53.69    5.20
  -5 -10   7   52.69    8.20
   5  10   7   40.60    9.80
   0 -11  -7 1134.29   83.59
   0  11   7 1008.00   81.19
   0 -11   7  975.10   80.99
   0  11  -7  875.11   81.19
  -1  11   7   28.00    5.20
   1  11  -7   30.00    6.30
   1 -11   7   35.90    5.60
   1  11  -7   41.60   10.50
  -1 -11  -7   36.40    8.20
  -1  11  -7   33.30    6.10
   1  11   7   28.30    7.70
  -1 -11   7   33.90    5.60
   1 -11  -7   46.30    8.90
   2  11  -7   66.09   13.90
  -2 -11  -7   75.69   11.50
   2 -11  -7  102.39   13.50
   2  11   7   71.19   12.30
  -2  11  -7   72.39    9.10
  -2 -11   7   72.79    8.80
  -2  11  -7   81.49   14.70
   3  11  -7   86.19   15.50
   3  11   7   80.29   13.20
   4  11  -7  130.89   19.20
  -4 -11  -7  112.99   12.50
   4  11   7  113.19   16.20
  -4 -11   7  130.39   13.30
  -5 -11  -7  112.09   11.90
   5  11  -7  129.39   17.10
   5  11   7  118.69   14.90
   0  12  -7   30.10    6.50
   0 -12  -7   25.20    7.90
   0  12   7   25.40    5.60
   0 -12   7   29.00    5.20
   1 -12   7   15.30    4.10
  -1 -12  -7   15.50    6.90
  -1  12   7   21.60    4.90
  -1  12  -7    8.80    4.60
   1 -12  -7   14.90    7.20
  -1 -12   7   15.20    4.20
   1  12   7   13.40    6.00
  -2 -12  -7    2.00    5.90
   2 -12   7    2.30    3.90
   2  12  -7   -3.10    7.80
   2 -12  -7    4.40    6.60
   2  12   7    3.50    5.80
  -2 -12   7    2.30    3.10
   3  12  -7  193.88   23.00
   3  12   7  191.78   20.70
  -4 -12  -7   30.80    5.50
   4  12  -7   35.90   10.40
   4  12   7   30.90    7.70
   0 -13  -7   24.50    7.90
   0 -13   7   26.50    5.20
  -1 -13  -7   70.59   11.40
   1 -13   7   73.49    8.70
  -1 -13   7   71.29    8.60
   1 -13  -7   75.99   11.60
  -2 -13  -7   14.30    7.70
   2 -13   7   13.00    4.20
   2 -13  -7   14.00    7.30
  -2 -13   7   14.50    3.50
  -2 -13   7   14.40    5.60
   2  13   7   14.10    5.40
   3  13  -7   16.30    7.50
   3  13   7    9.50    5.10
  -4 -13  -7   33.80    7.10
   0 -14  -7  207.58   20.80
   0 -14   7  191.18   17.70
  -1 -14  -7    3.60    5.80
   1 -14   7    6.40    3.30
   1 -14  -7   -1.30    5.90
  -1 -14   7    2.60    2.90
  -1 -14   7    5.60    5.10
   2 -14   7   85.59    9.90
   2 -14   7  116.59   13.30
   2 -14  -7   97.29   13.70
   0 -15   7   62.19   11.30
   0   0  -8  285.87   24.10
  -1   0   8  201.98   16.40
   1   0  -8  177.58   16.90
  -1   0  -8  217.48   17.00
   2   0  -8  265.47   21.80
  -2   0   8  244.28   20.90
  -2   0   8  258.37   21.30
  -2   0  -8  262.67   21.90
  -3   0   8 1215.18   87.49
   3   0  -8 1146.49   88.19
  -3   0   8  986.20   86.89
  -3   0  -8 1001.50   87.79
   4   0  -8  808.52   64.19
  -4   0  -8  699.03   62.89
  -4   0  -8  791.12   64.09
  -4   0  -8  846.72   64.79
  -4   0   8  837.52   62.89
  -4   0   8  686.73   65.49
  -5   0  -8  279.97   23.90
  -5   0  -8  310.07   26.60
  -5   0  -8  270.07   24.80
  -5   0   8  279.17   25.90
  -5   0   8  280.07   23.20
  -6   0  -8  307.47   28.90
  -6   0  -8  338.37   38.40
  -6   0   8  274.27   28.20
  -6   0  -8  311.17   25.80
  -7   0  -8   30.20    7.40
  -7   0  -8   41.00   14.00
  -7   0  -8   40.60    4.80
  -7   0   8   44.40    5.90
  -7   0   8   26.40    6.70
   0  -1  -8 6391.26  440.16
   0   1  -8 4656.73  440.16
  -1   1   8  146.59   12.20
  -1   1   8  148.99   12.50
   1   1  -8  151.08   13.30
  -1  -1  -8  156.28   13.80
  -1  -1   8  142.09   12.90
  -2   1   8 1329.97  111.99
  -2   1   8 1491.65  112.29
  -2  -1  -8 1508.55  112.89
   2   1  -8 1447.86  113.09
  -2  -1   8 1378.76  112.49
   2  -1  -8 1361.96  112.79
   2   1   8 1310.77  111.79
  -2   1  -8 1401.66  112.49
  -3   1   8 1075.89   93.39
  -3  -1  -8 1137.29   94.59
  -3   1   8 1302.77   93.79
   3   1  -8 1274.27   94.89
  -3   1  -8 1066.39   94.09
  -3  -1   8 1195.98   94.09
   3  -1  -8 1130.39   94.49
  -4  -1  -8  357.76   29.60
  -4  -1  -8  390.06   30.10
  -4   1   8  351.86   28.00
   4   1  -8  356.86   29.70
  -4  -1  -8  279.07   28.70
  -4   1  -8  325.27   28.10
  -4   1  -8  342.17   30.20
  -4   1  -8  320.07   29.40
  -4  -1   8  340.87   30.30
  -4  -1   8  365.26   28.60
  -5   1   8  140.69   16.70
  -5  -1  -8  188.08   17.40
  -5  -1  -8  182.48   16.50
   5   1  -8  165.58   16.40
  -5  -1   8  173.18   14.60
  -5  -1   8  181.18   17.20
  -5   1  -8  153.48   17.50
  -5   1  -8  162.18   14.60
  -6  -1  -8  155.48   16.40
  -6   1   8  107.89   15.60
  -6   1  -8  144.99   16.90
  -6   1  -8  160.78   27.80
  -6   1  -8  166.18   13.30
  -6  -1   8  140.39   16.20
  -7   1   8   57.09    6.70
  -7  -1  -8   63.99   15.60
  -7  -1  -8   59.99    9.50
  -7  -1  -8   48.40    6.30
  -7   1   8   38.80    8.10
  -7  -1   8   45.70    8.50
  -7   1  -8   49.90    9.10
  -7   1  -8   58.59   16.10
   0   2  -8  708.93   55.99
   0   2   8  740.63   55.69
   0  -2  -8  700.63   56.69
   0   2   8  667.13   55.79
   0   2  -8  663.33   56.69
  -1  -2  -8 1659.93  124.39
   1   2  -8 1522.55  124.39
  -1   2   8 1497.65  123.39
  -1   2   8 1483.05  123.49
   1   2   8 1553.94  123.29
  -1  -2   8 1567.24  123.99
  -2   2   8  598.44   52.09
  -2  -2  -8  708.33   53.59
   2   2  -8  674.13   53.29
  -2   2   8  664.73   52.29
  -2  -2   8  614.84   52.79
   3   2  -8  582.94   43.50
  -3   2   8  550.94   42.00
  -3  -2  -8  529.55   43.50
  -3   2   8  484.45   41.80
  -3  -2   8  502.35   42.60
  -3   2  -8  469.25   42.30
  -4  -2  -8 1025.60   88.79
  -4  -2  -8 1244.68   89.69
   4   2  -8 1135.29   89.59
  -4   2   8 1102.99   87.59
  -4  -2   8 1178.98   88.49
  -4   2  -8  971.60   88.79
  -4  -2   8 1132.49   89.29
  -4   2  -8 1009.10   89.79
  -4   2  -8 1049.59   87.79
   5   2  -8  317.87   30.20
  -5  -2  -8  384.56   30.50
  -5  -2  -8  381.16   30.80
  -5  -2   8  350.46   30.50
  -5   2  -8  282.87   30.80
  -5  -2   8  324.47   28.50
  -5   2  -8  382.36   41.90
  -5   2  -8  337.87   28.20
  -6   2   8   78.69    8.60
  -6  -2  -8   84.19   11.10
  -6   2   8   50.89   10.00
  -6  -2   8   74.69   10.40
  -6   2  -8   73.99   20.20
  -6   2  -8   81.89    7.30
  -6   2  -8   51.99   10.40
  -7   2   8   69.09    7.30
  -7  -2  -8   68.29   15.90
  -7   2   8   81.29    6.40
  -7   2   8   44.20    8.50
  -7  -2  -8   58.59    9.60
  -7   2  -8   77.99   18.00
  -7  -2   8   55.79    9.40
  -7   2  -8   43.80    8.90
   0   3  -8 5384.36  410.56
   0  -3  -8 5147.58  411.16
   0   3   8 4917.51  410.26
   0   3   8 5421.76  410.16
   0   3  -8 4873.11  411.26
  -1  -3  -8 1611.04  124.89
   1   3  -8 1664.73  124.89
  -1   3   8 1496.85  123.69
   1   3  -8 1494.55  123.99
  -1   3   8 1554.34  123.59
  -1  -3   8 1462.75  124.29
  -1   3  -8 1569.44  123.89
   1   3   8 1534.95  123.49
   2   3  -8 2790.02  211.18
  -2   3   8 2473.65  209.78
  -2   3   8 2628.54  209.88
  -2  -3  -8 2824.82  211.18
  -2  -3   8 2443.76  210.48
   3   3  -8  105.69   10.10
  -3   3   8   93.59    8.10
  -3   3   8   96.49    8.30
  -3  -3  -8   89.39   11.70
  -3  -3   8   95.99    9.80
  -3   3  -8  103.19   17.80
  -3   3  -8   93.09    8.10
  -3   3  -8   85.19    9.10
  -4  -3  -8  113.09   13.10
   4   3  -8  125.29   12.10
  -4  -3  -8  122.79   12.20
  -4  -3  -8  129.29   12.00
  -4   3   8  115.89    9.80
  -4   3   8   99.19   10.90
  -4   3  -8  111.79   22.20
  -4   3  -8  102.29   10.20
  -4   3  -8  123.69    9.60
  -4  -3   8   99.59   11.40
  -4  -3   8  119.69   11.60
  -5  -3  -8   16.90    5.10
  -5   3   8    6.70    4.50
  -5   3   8    9.10    3.50
  -5  -3  -8   16.60    4.80
   5   3  -8   14.10    4.40
  -5  -3  -8   15.40    5.10
  -5  -3   8   15.20    4.10
  -5   3  -8    6.00   12.00
  -5   3  -8   12.20    5.50
  -5   3  -8   19.10    1.90
  -5  -3   8   22.00    4.60
  -5  -3   8   14.60    4.80
  -6  -3  -8  348.37   30.20
  -6   3   8  328.37   28.40
  -6  -3  -8  332.67   29.40
  -6   3  -8  310.87   41.30
  -6  -3   8  316.17   29.80
  -7  -3  -8   31.20    6.80
  -7   3   8   31.70    4.40
  -7  -3  -8   38.40   11.70
  -7   3  -8   13.20    5.90
  -7  -3   8   26.70    6.40
  -7   3  -8   24.10   13.60
   0   4  -8  151.58   14.70
   0   4  -8  163.98   13.80
   0   4   8  159.98   13.40
   0   4   8  172.18   13.20
   0  -4  -8  151.98   15.80
   1   4  -8  182.88   16.00
  -1   4   8  178.38   15.40
   1   4  -8  208.08   16.90
  -1  -4  -8  179.88   18.00
   1   4   8  180.38   15.20
   1   4   8  192.28   15.50
  -1   4  -8  190.78   15.80
  -1  -4   8  171.88   16.50
  -2   4   8  677.83   52.99
  -2   4   8  653.73   53.09
  -2  -4  -8  702.73   55.09
   2   4  -8  711.03   54.59
  -2   4  -8  604.24   53.29
  -2  -4   8  617.74   54.09
   3   4  -8 1128.79   83.39
  -3  -4  -8  987.10   83.29
  -3   4   8  994.00   81.39
  -3   4   8  995.50   81.29
  -3   4  -8 1083.79   81.89
  -3  -4   8 1003.40   82.49
  -3   4  -8  961.80   81.29
  -3   4  -8  948.01   89.79
  -4  -4  -8  174.28   17.10
  -4   4   8  165.88   16.10
  -4   4   8  166.28   14.60
   4   4  -8  166.18   16.90
  -4  -4  -8  195.88   16.70
  -4  -4  -8  175.88   18.10
  -4  -4   8  171.48   16.50
  -4  -4   8  188.98   16.60
  -4   4  -8  178.08   27.20
  -4   4  -8  192.38   14.60
  -4   4  -8  162.58   16.50
  -5  -4  -8  389.56   31.50
  -5  -4  -8  308.97   30.90
  -5   4   8  331.37   30.30
  -5  -4  -8  397.16   32.10
  -5  -4   8  358.96   31.20
  -5   4  -8  324.57   43.40
  -5  -4   8  337.77   30.10
  -6   4   8  111.29   11.30
  -6  -4  -8  113.19   13.00
  -6  -4  -8  108.89   12.90
  -6   4  -8  110.59   25.80
  -6  -4   8  103.29   12.90
  -7   4   8   26.80    3.00
  -7  -4  -8   25.10    5.90
  -7   4   8   23.30    3.70
  -7  -4   8   27.50    3.90
  -7  -4   8   24.50    6.00
   0   5  -8   57.59    6.10
   0   5   8   56.29    5.40
   0  -5  -8   64.29    8.70
   0   5   8   57.19    5.10
   0   5  -8   53.59    7.00
   1   5  -8  853.51   68.99
  -1   5   8  858.01   68.69
  -1  -5  -8  847.12   70.39
  -1   5   8  848.92   68.49
   1   5  -8  885.91   69.99
   1   5   8  893.31   68.79
  -1  -5   8  740.43   69.39
   1   5   8  868.61   68.39
  -1   5  -8  878.71   68.89
  -2   5   8  271.97   22.60
   2   5  -8  282.97   24.20
  -2  -5  -8  296.87   25.50
  -2   5   8  279.77   22.50
  -2   5  -8  278.97   32.60
  -2  -5   8  273.57   24.10
  -2   5  -8  254.77   22.80
   3   5  -8  199.38   25.20
  -3   5   8  237.78   19.40
  -3  -5  -8  259.27   22.80
   3   5  -8  257.67   21.60
  -3   5   8  230.48   19.30
  -3  -5   8  240.78   21.20
  -3   5  -8  225.28   30.40
  -3   5  -8  239.88   19.50
  -3   5  -8  201.78   21.90
  -4  -5  -8  133.19   15.80
  -4  -5  -8  122.49   13.90
  -4   5   8  123.59   13.00
  -4   5   8  122.89   11.10
   4   5  -8  137.19   13.90
  -4  -5  -8  136.79   13.10
  -4   5  -8  115.39   24.00
  -4   5  -8  128.89   13.40
  -4   5  -8  134.19   11.20
  -4  -5   8  131.39   13.60
  -4  -5   8  139.39   13.10
  -5   5   8  444.56   39.00
  -5  -5  -8  452.45   40.40
  -5  -5  -8  415.96   39.90
  -5  -5  -8  472.55   39.70
  -5  -5   8  434.06   38.90
  -5   5  -8  541.55   37.20
  -5  -5   8  459.65   39.60
  -5   5  -8  378.56   51.29
  -6   5   8   30.90    5.60
  -6  -5  -8   31.20    7.00
  -6  -5  -8   28.50    6.50
  -6  -5   8   35.90    5.80
  -6  -5   8   36.30    7.00
  -7   5   8   57.29    5.00
  -7  -5  -8   51.19    8.10
  -7   5   8   52.69    5.50
  -7  -5   8   57.79    6.30
   0   6  -8 1075.79  102.89
   0   6  -8 1354.96  102.29
   0   6   8 1317.67  101.99
   0   6   8 1340.17  101.59
   1   6  -8  362.86   30.50
  -1   6   8  362.36   28.70
  -1   6   8  356.86   29.00
  -1  -6  -8  337.27   31.40
   1   6  -8  359.26   29.50
  -1   6  -8  348.37   29.20
  -1  -6   8  322.07   30.20
   1   6   8  360.96   28.60
  -2   6   8  239.18   19.40
   2   6  -8  248.18   21.30
  -2   6   8  235.48   19.20
  -2  -6  -8  227.38   22.70
  -2  -6  -8  215.88   22.80
  -2  -6   8  209.48   21.10
  -2  -6   8  245.88   19.60
   2   6   8  224.48   22.90
  -2   6  -8  221.58   19.60
  -3   6   8  583.74   48.40
   3   6  -8  616.94   50.79
  -3  -6  -8  678.33   51.59
  -3   6   8  620.84   48.50
   3   6  -8  494.65   52.99
  -3   6  -8  599.14   60.89
  -3  -6   8  612.04   50.19
  -3   6  -8  583.24   48.60
  -3   6  -8  575.44   51.19
   3   6   8  616.64   51.99
  -4   6   8  109.09   10.50
   4   6  -8  114.19   19.10
  -4  -6  -8  117.69   13.80
  -4  -6  -8  126.59   12.60
   4   6  -8  116.09   13.30
  -4  -6  -8  111.09   15.20
  -4   6  -8  129.69   27.80
  -4   6  -8  138.29   13.50
  -4   6  -8  125.69   10.70
  -4  -6   8  108.49   13.30
  -4  -6   8  134.19   12.70
  -5  -6  -8  156.78   18.90
  -5  -6  -8  167.68   17.20
  -5   6   8  161.58   16.70
  -5  -6  -8  161.78   18.20
  -5  -6   8  196.08   17.20
  -5   6  -8  192.58   14.70
  -5  -6   8  171.98   17.20
  -5  -6   8  158.88   17.10
  -6  -6  -8  182.08   19.40
  -6  -6  -8  186.88   18.40
  -6   6   8  183.58   17.20
  -6  -6   8  180.68   18.40
  -6  -6   8  207.48   17.80
  -7   6   8   31.30    3.30
  -7  -6  -8   29.70    5.80
  -7  -6   8   36.30    4.90
   0   7  -8  561.64   45.00
   0  -7  -8  629.44   46.60
   0   7   8  504.25   44.20
   0   7   8  542.45   46.30
   0  -7   8  515.75   45.00
   0   7   8  550.74   44.70
  -1   7   8  190.98   16.00
  -1  -7  -8  215.08   18.20
  -1   7   8  185.28   15.60
  -1  -7  -8  156.98   19.00
   1   7  -8  185.28   16.50
   1   7  -8  160.68   20.50
   1   7  -8  161.38   17.40
   1  -7  -8  196.88   19.00
  -1  -7   8  187.98   16.00
   1   7   8  202.08   19.00
   1   7   8  201.08   15.50
  -1   7  -8  183.28   16.30
  -2  -7  -8  637.44   55.89
   2   7  -8  651.53   55.29
  -2   7   8  674.83   53.39
  -2   7   8  661.03   53.09
  -2  -7  -8  738.53   55.39
   2   7  -8  581.04   57.29
  -2   7  -8  621.74   53.49
  -2  -7   8  734.63   53.69
  -2   7  -8  573.04   56.49
  -2  -7   8  652.73   55.19
   2   7   8  683.53   56.29
  -3   7   8  496.65   39.10
  -3   7   8  456.05   38.90
   3   7  -8  473.85   41.50
   3   7  -8  402.26   44.20
  -3  -7  -8  508.45   42.60
  -3   7  -8  492.55   42.60
  -3  -7   8  450.05   41.10
  -3  -7   8  489.15   39.50
   3   7   8  530.95   43.20
  -4  -7  -8   91.59   14.20
  -4  -7  -8  100.89   11.40
   4   7  -8   83.49   12.00
  -4   7   8  119.79    9.40
   4   7  -8   76.19   16.70
  -4   7  -8  129.89   13.10
  -4  -7   8  109.99   11.50
  -4  -7   8   96.19   12.80
   4   7   8  111.99   16.50
  -4   7  -8   97.79    9.40
   5   7  -8  210.08   29.30
  -5  -7  -8  215.38   24.10
  -5  -7  -8  233.78   24.70
  -5  -7  -8  263.77   23.10
  -5  -7   8  253.57   23.00
  -5  -7   8  249.58   22.80
  -5  -7   8  231.58   23.10
  -5   7  -8  274.47   20.60
  -6  -7  -8   83.49   12.20
  -6  -7  -8   92.59   10.90
  -6   7   8   86.39    9.40
  -6  -7   8   94.89   11.20
  -6  -7   8   87.19   10.00
   0   8   8  532.15   44.30
   0   8   8  509.75   42.00
   0  -8   8  481.05   42.40
   0   8   8  526.85   42.60
   0   8  -8  451.35   44.90
   0  -8  -8  603.34   44.70
   0   8  -8  534.95   42.90
  -1  -8  -8    6.60    6.50
  -1   8   8    4.10    1.70
   1  -8   8    4.80    2.10
   1   8  -8    5.60    3.10
   1   8  -8    0.60    7.80
  -1  -8  -8    7.00    4.60
  -1   8   8    6.50    2.30
   1   8   8    5.40    5.40
   1   8   8    5.40    2.60
  -1   8  -8    5.50    2.80
   1  -8  -8    8.50    4.80
  -1  -8   8    4.90    2.20
   2   8  -8  200.38   26.00
   2   8  -8  228.98   22.70
  -2   8   8  268.67   20.70
  -2  -8  -8  272.57   23.20
  -2   8   8  251.07   20.30
  -2  -8  -8  238.68   24.40
  -2  -8   8  236.38   23.40
  -2   8  -8  215.48   24.90
   2   8   8  234.88   24.20
  -2  -8   8  262.17   20.90
  -2   8  -8  226.68   20.90
  -3  -8  -8   22.60    8.60
   3   8  -8   29.90    6.90
   3   8  -8   28.50   11.50
  -3   8   8   35.00    4.50
  -3   8  -8   29.70    8.40
  -3  -8   8   24.90    7.20
   3   8   8   29.10    8.60
  -3  -8   8   36.50    5.20
  -3   8  -8   22.80    4.20
   4   8  -8   37.30   13.10
  -4  -8  -8   45.10    7.30
  -4  -8  -8   44.20   10.20
  -4   8   8   41.30    5.00
  -4  -8   8   45.80    7.60
   4   8   8   45.30   10.90
  -4  -8   8   32.40    7.80
  -4   8  -8   43.40    5.10
  -5  -8  -8  196.78   23.20
  -5  -8  -8  240.78   22.00
   5   8  -8  204.18   27.80
   5   8   8  234.38   25.10
  -5  -8   8  246.28   22.10
  -5   8  -8  252.97   19.60
  -6  -8  -8   12.70    5.80
  -6   8   8   13.50    3.50
   6   8  -8   19.90    9.70
  -6  -8  -8   14.90    4.80
  -6   8  -8   18.20    2.00
  -6   8  -8   18.70    2.20
  -6  -8   8   13.50    4.10
   0   9   8  150.08   13.60
   0   9   8  155.58   15.90
   0  -9  -8  164.78   16.40
   0   9  -8  141.49   14.00
   0   9  -8  146.79   17.00
   0  -9   8  135.79   13.20
   1   9  -8  369.26   33.60
   1  -9   8  372.96   33.00
  -1  -9  -8  450.95   35.70
  -1   9   8  407.96   33.20
   1   9  -8  370.86   37.40
   1   9   8  387.26   35.80
  -1  -9   8  398.46   33.20
   1  -9  -8  465.75   35.80
   1   9   8  376.56   33.60
  -1   9  -8  392.16   33.50
  -2  -9  -8  147.59   16.20
  -2   9   8  148.19   13.50
   2   9  -8  141.29   20.70
  -2  -9  -8  139.69   18.40
  -2  -9   8  151.98   13.80
  -2   9  -8  128.49   13.70
  -2  -9   8  198.78   24.70
  -2   9  -8  159.18   19.30
   2   9   8  159.28   18.00
  -3   9   8   72.49    7.80
  -3  -9  -8   78.39   13.20
   3   9  -8   65.69   15.60
   3   9   8   66.39   12.50
  -3  -9   8   88.99   12.20
  -3   9  -8  100.89   14.70
  -3   9  -8   70.09    8.10
  -4  -9  -8  776.82   72.49
   4   9  -8  874.51   76.69
  -4  -9  -8  957.60   71.39
  -4  -9   8  756.72   71.39
   4   9   8  903.71   73.89
  -5  -9  -8  170.08   20.80
   5   9  -8  182.88   24.70
  -5  -9  -8  193.58   18.60
  -5  -9   8  206.28   19.40
  -5   9  -8  204.08   16.40
   5   9   8  190.28   21.40
   6   9  -8   65.39   11.50
  -6  -9  -8   40.30    8.50
  -6  -9  -8   45.40    7.40
  -6  -9   8   41.10    7.20
  -6   9  -8   59.39    5.20
  -6   9  -8   67.59    4.90
   0  10  -8   42.70    6.80
   0 -10   8   41.30    5.90
   0  10   8   42.20    7.70
   0 -10  -8   47.40    9.00
   0  10   8   44.10    6.30
   1 -10   8  259.77   23.00
   1  10  -8  245.68   28.00
  -1 -10  -8  300.67   26.20
  -1  10   8  268.07   23.20
   1  10  -8  247.18   23.80
   1  10   8  262.67   26.10
  -1  10  -8  250.67   23.60
  -1 -10   8  288.47   23.40
   1 -10  -8  289.27   26.10
  -2  10   8  495.65   41.00
  -2 -10  -8  399.16   43.90
  -2 -10  -8  518.45   43.60
   2  10  -8  520.05   47.00
  -2  10  -8  441.26   41.10
  -2 -10   8  519.05   41.40
   2  10   8  514.45   44.60
   2 -10  -8  548.35   44.40
  -3  10   8  387.76   31.50
  -3 -10  -8  361.76   35.40
   3  10  -8  413.06   39.60
  -3 -10   8  338.07   34.30
   3  10   8  390.26   35.90
  -3 -10   8  372.06   33.30
  -4 -10  -8   26.20    5.80
   4  10  -8   30.20   12.10
   4  10   8   22.60    9.00
  -4 -10   8   29.40    8.00
   5  10  -8   56.09   12.20
  -5 -10  -8   41.60    6.90
  -5  10  -8   43.30    4.50
   5  10   8   44.30    9.10
   0  11  -8   91.69   11.40
   0  11   8  100.99   11.00
   0 -11   8   97.09   10.40
   0 -11  -8  117.19   14.40
   1 -11   8   17.80    4.20
  -1 -11  -8   26.90    7.50
   1  11  -8   20.40    9.20
   1  11  -8   10.60    5.00
  -1  11   8   18.10    4.20
   1  11   8   21.10    6.90
   1 -11  -8   25.10    7.40
  -1  11  -8   20.70    5.30
  -1 -11   8   15.30    4.20
  -2  11   8  534.65   43.70
  -2 -11  -8  528.05   46.10
   2  11  -8  543.25   48.90
  -2 -11   8  524.35   43.80
   2  11   8  533.15   46.60
   2 -11  -8  603.14   47.00
  -2  11  -8  436.96   43.50
   3  11  -8  187.28   23.20
   3  11   8  170.88   20.50
  -4 -11  -8   50.69    7.30
   4  11  -8   53.19   12.60
   4  11   8   34.20    8.90
  -5 -11  -8   20.20    4.60
   5  11  -8   23.10    8.70
   5  11   8   19.60    6.40
   0  12  -8  324.97   31.80
   0 -12   8  373.86   31.30
   0 -12  -8  401.46   34.20
   0  12   8  364.76   31.60
  -1  12   8  115.69   12.90
   1 -12   8  120.49   11.90
  -1 -12  -8  127.29   15.60
  -1 -12   8  112.99   12.00
   1 -12  -8  128.39   16.10
  -1  12  -8  101.99   13.50
   1  12   8  116.39   13.80
   2  12  -8  129.99   17.80
  -2 -12  -8  117.09   14.50
   2 -12   8  109.59   11.50
   2 -12  -8  120.99   15.90
  -2 -12   8  106.39   11.40
   2  12   8  118.29   14.60
   3  12  -8   54.19   11.70
   3  12   8   42.20    8.80
  -4 -12  -8   58.99    7.30
   4  12  -8   50.79   11.40
   4  12   8   51.19    9.10
   0 -13   8   89.29   10.20
   0 -13  -8  110.39   14.00
  -1 -13  -8   93.89   13.30
   1 -13   8   78.09    9.20
   1 -13  -8   83.59   12.60
  -1 -13   8   81.19    9.20
   2 -13   8   15.70    4.30
   2 -13  -8   11.70    7.30
   2  13   8   12.90    5.30
  -2 -13   8   20.30    6.00
  -2 -13   8   13.30    3.50
   3  13  -8   26.40    8.10
   3  13   8   11.60    5.30
   0 -14  -8  100.69   13.10
   0 -14   8   91.09    9.90
  -1 -14  -8   24.20    7.20
   1 -14   8   20.30    4.20
  -1 -14   8   26.80    6.40
   1 -14  -8   28.00    7.60
  -1 -14   8   19.20    4.00
   2 -14   8   64.49   10.60
   2 -14   8   48.40    7.30
   2 -14  -8   51.99    9.50
   0   0  -9   -0.90    3.00
  -1   0   9 1347.87  106.89
   1   0  -9 1163.68  107.39
  -1   0  -9 1504.75  107.39
  -2   0  -9  156.48   15.00
  -2   0   9  165.78   14.20
   2   0  -9  170.68   14.80
  -3   0   9   69.69    6.60
   3   0  -9   67.79    7.10
  -3   0   9   56.19    5.60
  -3   0  -9   69.39    8.40
   4   0  -9  493.75   39.20
  -4   0  -9  387.16   38.30
  -4   0   9  545.15   37.90
  -4   0   9  402.66   39.80
  -4   0  -9  427.66   37.90
  -4   0  -9  517.25   39.70
  -4   0  -9  459.05   39.30
  -5   0  -9   22.00    5.20
  -5   0  -9   21.50    4.00
  -5   0  -9   23.80    6.10
  -5   0   9   21.70    5.60
  -5   0   9   27.60    3.40
  -6   0  -9 1030.80   93.29
  -6   0   9  909.71   83.99
  -6   0  -9 1065.79   82.19
  -6   0  -9 1040.50   84.79
  -7   0   9   18.40    5.80
  -7   0   9   24.80    4.90
  -7   0  -9   23.80    6.30
  -7   0  -9   18.50   12.00
  -7   0  -9   27.80    3.80
   0   1  -9 2342.97  214.18
   0   1   9 3007.40  213.38
  -1  -1  -9 1849.61  145.89
   1   1  -9 2036.70  146.09
   1   1  -9 1689.63  146.09
  -1   1   9 1752.32  145.09
  -1   1   9 1792.52  145.29
  -1  -1   9 1803.02  145.49
  -2   1   9  442.86   35.30
  -2   1   9  399.76   34.90
  -2  -1  -9  475.55   36.30
   2   1  -9  438.36   36.10
  -2  -1   9  434.06   35.50
   2  -1  -9  389.76   35.80
  -2   1  -9  475.35   35.80
   3   1  -9  117.39   11.10
  -3   1   9  103.79    9.40
  -3   1   9  122.59   10.00
  -3  -1  -9  114.59   12.10
   3  -1  -9  114.99   10.80
  -3   1  -9  104.49   11.10
  -3  -1   9  110.69   10.50
  -4  -1  -9   93.59    9.80
  -4   1   9   63.59    9.30
   4   1  -9   91.29    9.30
  -4  -1  -9   78.29    9.90
  -4  -1  -9   84.99    9.70
  -4   1   9   86.99    7.80
  -4   1  -9   81.39    7.90
  -4   1  -9   82.89   10.00
  -4   1  -9   79.59   10.00
  -4  -1   9   78.29    8.30
   5   1  -9   72.19    9.90
  -5   1   9   77.49   10.70
  -5  -1  -9  100.39   10.80
  -5   1   9   76.19    7.60
  -5  -1  -9  115.39   11.80
  -5  -1   9   94.09   10.90
  -5  -1   9   73.59    8.30
  -5   1  -9  100.59    8.70
  -5   1  -9   93.49   11.50
  -6  -1  -9  764.12   64.19
  -6   1  -9  685.53   64.19
  -6   1  -9  801.52   74.49
  -6  -1   9  710.63   63.69
  -6   1  -9  822.42   61.59
  -7  -1  -9    4.60    2.70
  -7  -1  -9    4.70    5.10
  -7   1   9    2.60    4.00
  -7  -1  -9    7.90    9.80
  -7   1   9    4.50    3.00
  -7  -1   9    2.60    4.20
  -7   1  -9    6.10   10.90
  -7   1  -9    3.20    4.50
   0   2   9 2360.06  172.98
   0  -2  -9 2337.57  173.98
   0   2  -9 1866.31  173.98
   0   2   9 2121.79  173.08
  -1   2   9  537.55   42.60
   1   2  -9  522.75   43.80
  -1  -2  -9  549.65   43.90
  -1   2   9  523.35   42.80
  -1  -2   9  513.35   43.20
   1   2   9  538.85   42.50
  -2  -2  -9   24.40    5.40
  -2   2   9   21.30    2.60
  -2   2   9   24.90    3.20
   2   2  -9   26.90    4.20
  -2   2  -9   30.30    4.40
  -2  -2   9   23.20    3.80
   2  -2  -9   17.80    3.60
   3   2  -9  153.78   13.80
  -3   2   9  137.69   12.00
  -3   2   9  153.88   12.30
  -3  -2  -9  136.09   14.60
  -3  -2   9  146.49   13.20
  -3   2  -9  130.89   13.00
   4   2  -9  108.49   10.80
  -4   2   9  107.29    8.80
  -4  -2  -9  102.19   10.70
  -4  -2  -9  104.19   11.10
  -4  -2  -9   92.49   11.70
  -4   2  -9   81.09   11.10
  -4   2  -9   88.49   11.00
  -4  -2   9  109.39   10.00
  -4   2  -9   91.79    9.10
   5   2  -9  105.69   12.20
  -5   2   9   80.99   12.20
  -5  -2  -9  124.39   13.00
  -5  -2  -9  130.09   13.00
  -5  -2   9  112.69   12.50
  -5   2  -9  101.29   13.30
  -5   2  -9  135.89   26.50
  -5  -2   9  117.19   10.80
  -5   2  -9  115.39   10.40
  -6   2   9   61.39   10.60
  -6  -2  -9   90.19   11.50
  -6   2   9   91.49    9.30
  -6   2  -9  104.59   23.50
  -6  -2   9   77.49   10.90
  -6   2  -9   67.69   11.50
  -7   2   9  196.38   15.30
  -7  -2  -9  160.38   23.80
  -7  -2  -9  172.18   17.30
  -7   2  -9  173.78   26.50
  -7   2  -9  123.89   16.70
   0  -3  -9  690.63   57.19
   0   3   9  696.53   55.99
   0   3  -9  673.93   57.19
   0   3   9  715.23   55.79
   0   3  -9  708.53   56.29
   1   3  -9 3522.95  269.77
   1   3  -9 3302.87  268.87
  -1  -3  -9 3428.96  269.57
  -1   3   9 3398.26  268.37
  -1   3   9 3334.27  268.57
  -1  -3   9 3231.58  269.07
   1   3   9 3338.87  268.27
  -1   3  -9 3382.06  268.67
  -2  -3  -9  192.68   18.70
  -2   3   9  193.58   16.10
  -2   3   9  203.48   16.40
   2   3  -9  200.28   17.70
  -2  -3   9  191.48   17.30
   3   3  -9  649.93   48.50
  -3   3   9  575.14   46.50
  -3  -3  -9  609.04   48.50
  -3   3   9  545.95   46.40
  -3  -3   9  581.64   47.50
  -3   3  -9  504.85   49.40
  -3   3  -9  608.74   55.19
  -3   3  -9  550.24   47.00
   4   3  -9  909.51   71.39
  -4  -3  -9  895.41   71.49
  -4   3   9  822.02   68.99
  -4  -3  -9  856.11   70.99
  -4   3   9  785.22   70.09
  -4  -3   9  950.80   71.99
  -4   3  -9  871.91   69.59
  -4  -3   9  886.51   70.09
  -4   3  -9  756.72   70.49
  -4   3  -9  885.31   80.29
  -5  -3  -9   65.39    9.00
  -5  -3  -9   71.49    9.20
  -5   3   9   59.19    7.80
  -5  -3  -9   69.49    9.40
   5   3  -9   55.19    8.40
  -5   3  -9   55.09   18.30
  -5   3  -9   46.20    9.50
  -5  -3   9   70.59    7.80
  -5  -3   9   61.19    8.70
  -6   3   9   89.29    9.40
  -6  -3  -9   91.29   11.40
  -6  -3  -9   83.29   10.60
  -6   3  -9   72.49   21.10
  -6  -3   9   69.39   10.60
  -6   3  -9   60.39   11.60
  -7  -3  -9   20.70    9.90
  -7   3   9   25.20    3.20
  -7   3   9   22.10    4.00
  -7  -3  -9   25.60    6.30
  -7   3  -9   22.50   13.00
   0  -4  -9   80.29   10.40
   0   4   9   83.49    6.80
   0   4   9   76.79    7.10
   0   4  -9   80.79    7.80
   0   4  -9   75.59    8.80
   1   4  -9 1519.15  124.99
  -1  -4  -9 1584.64  125.99
   1   4  -9 1636.64  125.99
  -1   4   9 1572.04  124.59
  -1   4   9 1478.65  124.39
   1   4   9 1548.95  124.29
  -1   4  -9 1552.24  124.79
  -1  -4   9 1480.95  125.29
   1   4   9 1649.73  124.99
   2   4  -9  688.53   55.19
  -2  -4  -9  712.43   55.69
  -2   4   9  644.34   53.49
  -2   4   9  662.63   53.69
  -2  -4   9  632.04   54.59
  -3   4   9  275.27   25.00
  -3   4   9  291.97   25.10
  -3  -4  -9  331.77   28.00
   3   4  -9  321.37   27.10
  -3  -4   9  298.17   26.40
  -3   4  -9  319.07   25.10
  -3   4  -9  317.77   25.90
  -3   4  -9  321.77   35.40
  -4  -4  -9   95.49   10.10
  -4   4   9   82.39    7.90
  -4   4   9   70.09    9.50
  -4  -4  -9   87.99   10.70
   4   4  -9   86.89   10.30
  -4  -4  -9   92.69   12.40
  -4   4  -9  103.99    7.80
  -4   4  -9   80.69   19.90
  -4  -4   9   94.79   10.20
  -4   4  -9   83.59   10.50
  -5  -4  -9  164.28   16.20
  -5  -4  -9  169.08   17.00
  -5  -4  -9  168.38   17.10
  -5   4   9  149.69   15.30
   5   4  -9  134.39   19.70
  -5  -4   9  176.18   16.30
  -5  -4   9  148.19   15.10
  -5   4  -9  179.88   30.50
  -6  -4  -9   73.69   10.80
  -6  -4  -9   72.19   10.70
  -6   4   9   75.69    9.20
  -6  -4   9   73.19   12.10
  -6   4  -9   75.29   20.90
  -6  -4   9   95.89    9.30
  -7  -4  -9   88.19   11.50
  -7   4   9   96.59    9.60
  -7   4   9  108.39    9.00
  -7  -4   9  110.39    9.50
   0   5   9  732.23   56.69
   0   5   9  751.22   56.39
   0   5  -9  773.72   57.09
   0  -5  -9  643.14   58.19
   0   5  -9  608.04   57.79
  -1   5   9  254.07   19.50
  -1   5   9  239.38   19.70
   1   5  -9  239.28   20.30
   1   5  -9  237.48   21.20
  -1  -5  -9  227.18   22.30
  -1  -5   9  219.08   20.80
   1   5   9  242.78   19.80
  -1   5  -9  238.08   20.00
   1   5   9  228.98   19.30
   2   5  -9   58.99    7.40
  -2   5   9   57.49    5.40
  -2   5   9   62.29    5.70
  -2  -5  -9   58.69    9.20
  -2   5  -9   53.09   15.10
  -2   5  -9   52.29    6.10
  -2  -5   9   61.59    8.20
   3   5  -9  331.17   28.60
   3   5  -9  269.57   31.80
  -3  -5  -9  348.27   29.60
  -3  -5  -9  288.87   28.60
  -3   5   9  319.07   26.30
  -3   5   9  336.77   26.50
  -3   5  -9  290.97   29.20
  -3   5  -9  309.97   37.90
  -3   5  -9  347.17   26.50
   3   5   9  347.27   30.70
  -3  -5   9  335.47   28.10
  -4  -5  -9   37.40    7.30
   4   5  -9   34.30    6.60
  -4  -5  -9   45.80    8.90
  -4  -5  -9   43.70    6.50
  -4   5   9   38.70    4.40
  -4   5   9   37.60    7.80
  -4   5  -9   36.40    6.90
  -4  -5   9   55.89    9.40
  -4   5  -9   49.50   17.20
  -4   5  -9   41.90    4.20
  -4  -5   9   39.40    6.70
  -4  -5   9   51.79    7.30
  -5  -5  -9  157.18   15.70
  -5  -5  -9  134.19   16.40
  -5  -5  -9  168.88   17.40
  -5   5   9  130.79   14.90
  -5  -5   9  130.69   15.30
  -5   5  -9  105.99   25.80
  -5   5  -9  175.88   12.90
  -5  -5   9  140.19   15.10
  -5  -5   9  190.58   15.80
  -6   5   9    7.60    3.70
  -6  -5  -9    8.40    4.90
  -6  -5  -9    6.70    4.80
  -6  -5   9   11.60    6.80
  -6  -5   9    9.70    3.50
  -6   5  -9   14.10    1.70
  -7   5   9  143.59   12.90
  -7  -5  -9  127.29   14.70
  -7   5   9  155.38   12.50
  -7  -5   9  167.78   13.50
   0   6  -9  555.44   46.50
   0   6   9  577.44   46.20
   0   6   9  573.94   45.80
  -1  -6  -9  101.19   13.40
  -1   6   9  111.39    9.90
   1   6  -9  101.39   10.60
  -1   6   9  116.69    9.60
   1   6  -9  107.79   11.70
  -1  -6   9  117.69   15.70
   1   6   9  117.59    9.40
  -1   6  -9  107.59   10.30
  -2   6   9  358.66   27.70
   2   6  -9  271.97   32.00
  -2   6   9  343.97   27.40
   2   6  -9  350.46   29.60
  -2  -6  -9  346.47   30.70
  -2  -6  -9  360.96   29.70
  -2  -6   9  319.37   29.20
  -2   6  -9  286.47   31.00
  -2  -6   9  361.76   27.80
  -2   6  -9  307.87   27.80
   2   6   9  353.36   30.80
   3   6  -9   30.90    6.30
   3   6  -9   24.40   10.30
  -3  -6  -9   30.20    7.90
  -3   6   9   27.30    3.60
  -3   6   9   22.50    3.20
   3   6   9   31.10    8.30
  -3   6  -9   26.20    7.00
  -3   6  -9   31.20   14.30
  -3   6  -9   26.50    3.50
  -3  -6   9   31.00    6.10
   4   6  -9  188.78   18.90
  -4  -6  -9  181.88   20.50
   4   6  -9  154.08   24.10
  -4   6   9  185.98   15.80
  -4  -6  -9  169.08   18.90
  -4  -6  -9  191.28   17.70
  -4   6  -9  193.78   15.90
  -4   6  -9  181.98   33.00
  -4   6  -9  214.08   18.80
  -4  -6   9  178.38   18.20
  -5  -6  -9   80.79   10.80
  -5  -6  -9  102.39   13.30
  -5  -6  -9   84.89   12.20
  -5  -6   9   78.69   11.00
  -5  -6   9   86.19   11.00
  -5  -6   9  101.39   10.80
  -5   6  -9   99.39    8.10
  -6  -6  -9  180.18   17.80
  -6  -6  -9  159.88   18.60
  -6   6   9  180.38   16.60
  -6  -6   9  191.78   17.00
  -7  -6  -9   13.70    4.50
  -7  -6   9   15.90    3.20
   0  -7   9  190.18   16.00
   0   7  -9  179.98   16.40
   0  -7  -9  213.38   18.50
   0   7  -9  147.39   20.00
   0   7   9  181.78   15.50
   0   7   9  192.28   18.30
   0   7   9  189.58   16.00
  -1   7   9   34.00    4.00
   1   7  -9   30.40    5.20
  -1  -7  -9   33.60    8.20
  -1  -7  -9   35.50    6.50
   1   7  -9   35.00    6.50
  -1   7   9   40.00    4.60
   1   7  -9   39.60    9.70
   1   7   9   36.70    3.80
   1  -7  -9   49.70    7.70
  -1   7  -9   30.10    4.70
   1   7   9   34.80    7.20
  -1  -7   9   36.70    4.50
  -2  -7  -9  147.69   17.60
  -2   7   9  150.98   13.20
   2   7  -9  146.69   15.40
   2   7  -9  148.39   19.70
  -2   7   9  141.19   12.90
  -2  -7  -9  165.08   16.00
  -2  -7   9  136.29   15.70
   2   7   9  165.88   17.40
  -2  -7   9  170.28   13.50
  -2   7  -9  151.48   18.20
  -2   7  -9  137.69   13.50
  -3   7   9  144.69   12.30
   3   7  -9  131.29   14.80
  -3  -7  -9  146.59   17.10
  -3   7   9  137.59   12.10
   3   7  -9  105.39   18.60
   3   7   9  147.29   17.80
  -3  -7   9  142.79   12.60
  -3   7  -9  148.09   17.10
  -3  -7   9  133.29   15.00
   4   7  -9  388.16   41.90
  -4   7   9  416.36   34.70
  -4  -7  -9  388.56   38.50
  -4  -7  -9  459.75   36.70
  -4  -7   9  389.06   36.80
   4   7   9  451.65   39.90
  -4   7  -9  447.16   34.90
   5   7  -9   34.10   13.60
  -5  -7  -9   35.70    8.10
  -5  -7  -9   33.80    6.70
  -5  -7  -9   33.90    9.20
  -5  -7   9   31.20    6.80
  -5  -7   9   35.50    6.40
  -5  -7   9   41.10    9.40
  -5   7  -9   36.00    3.90
  -6  -7  -9   61.49   10.30
  -6  -7  -9   67.69    8.90
  -6   7   9   67.49    7.80
  -6  -7   9   62.19    8.10
   0   8   9   91.79   11.50
   0  -8   9   85.29    8.40
   0   8  -9   90.89    9.40
   0   8  -9   88.39   12.80
   0   8   9   88.49    8.70
   0   8   9   81.19    7.90
   0  -8  -9  103.79   11.80
  -1   8   9  359.06   30.50
  -1   8   9  413.46   31.10
   1  -8   9  322.87   30.70
   1   8  -9  320.57   35.40
   1   8  -9  358.36   31.50
  -1  -8  -9  312.37   33.60
  -1  -8  -9  406.96   33.20
  -1  -8   9  378.96   31.00
   1   8   9  406.26   31.40
   1   8   9  372.56   33.50
  -1   8  -9  376.76   31.30
   1  -8  -9  422.66   33.40
   2   8  -9   97.49   12.70
  -2   8   9  130.49   10.70
   2   8  -9  104.49   16.80
  -2  -8  -9  123.49   13.70
  -2  -8  -9   95.89   14.10
  -2   8   9  115.39   10.20
  -2  -8   9  121.09   10.80
   2   8   9  116.99   15.10
  -2   8  -9  105.89   10.90
  -2   8  -9  108.09   16.10
  -2  -8   9  112.39   13.90
  -3   8   9  485.95   37.60
   3   8  -9  426.86   40.20
   3   8  -9  422.86   44.00
  -3   8   9  437.56   37.30
  -3  -8  -9  435.56   41.00
   3   8   9  493.55   41.80
  -3  -8   9  449.56   39.90
  -3  -8   9  480.15   37.80
  -4  -8  -9  506.55   46.60
   4   8  -9  449.95   49.70
  -4   8   9  464.75   42.50
  -4  -8  -9  562.94   44.70
  -4  -8   9  625.74   45.70
   4   8   9  562.14   47.50
  -4  -8   9  476.55   44.80
  -5  -8  -9    0.80    3.80
  -5  -8  -9    4.50    5.20
   5   8  -9    2.90    9.90
   5   8   9    8.10    6.90
  -5   8  -9    2.00    1.40
  -6  -8  -9   45.20    7.70
  -6  -8  -9   48.70    9.10
   6   8  -9   61.49   12.40
  -6   8   9   44.40    6.50
  -6  -8   9   47.40    7.20
  -6   8  -9   67.49    5.00
   0   9   9  497.45   42.60
   0  -9   9  468.55   40.80
   0   9   9  531.05   41.20
   0  -9  -9  560.14   43.60
   0   9  -9  478.35   41.40
   0   9  -9  435.66   45.00
   1  -9   9  502.35   45.60
   1   9  -9  522.15   46.30
  -1  -9  -9  637.14   48.40
  -1   9   9  564.54   45.90
   1   9  -9  518.15   50.09
  -1   9   9  523.25   45.30
  -1  -9   9  566.34   45.90
  -1   9  -9  566.54   46.30
   1   9   9  570.74   48.40
   1  -9  -9  622.04   48.40
   2   9  -9   88.99   16.60
  -2  -9  -9   99.49   13.30
  -2   9   9  104.59   10.10
  -2  -9  -9   88.69   14.20
   2   9   9  106.59   14.80
  -2  -9   9  104.99   10.20
  -2   9  -9   94.59   10.40
  -2   9  -9  119.79   16.80
   2  -9  -9  108.99   15.40
   3   9  -9  377.96   40.20
  -3  -9  -9  368.86   36.40
  -3   9   9  414.76   32.60
  -3  -9   9  363.16   33.50
   3   9   9  434.66   37.10
  -3  -9   9  383.26   35.30
  -4  -9  -9   92.89   10.60
   4   9  -9   76.79   16.70
  -4  -9  -9   92.49   13.90
   4   9   9   91.49   14.10
  -4  -9   9   73.29   11.70
   5   9  -9   67.79   14.60
  -5  -9  -9   54.49   10.60
  -5  -9  -9   68.49    9.10
   5   9   9   64.99   11.50
  -5   9  -9   73.29    6.40
  -6  -9  -9    8.00    3.60
  -6  -9  -9    2.20    4.30
   0  10   9  125.09   11.80
   0 -10  -9  126.69   15.00
   0 -10   9  113.19   11.20
   0  10   9  110.19   13.50
   0  10  -9  106.69   12.20
  -1  10   9  197.18   17.70
   1  10  -9  196.18   23.30
  -1 -10  -9  210.78   20.80
   1  10  -9  178.28   18.40
   1 -10   9  201.38   17.50
  -1  10  -9  163.58   18.00
   1  10   9  200.78   20.90
  -1 -10   9  203.98   17.70
   1 -10  -9  225.78   21.20
  -2 -10  -9  258.07   30.80
  -2 -10  -9  333.67   29.50
   2  10  -9  300.37   33.40
  -2  10   9  325.77   26.70
  -2 -10   9  327.87   26.90
   2  10   9  319.67   30.20
  -2  10  -9  343.97   32.80
  -2  10  -9  253.67   26.60
   2 -10  -9  341.57   30.20
  -3  10   9  223.68   18.00
   3  10  -9  185.08   26.00
  -3 -10  -9  189.78   22.30
  -3 -10   9  193.18   21.50
   3  10   9  197.28   23.00
   4  10  -9    4.80   10.20
  -4 -10  -9    3.20    3.70
   4  10   9    1.00    6.90
  -5 -10  -9  109.89   12.20
   5  10  -9  118.19   17.60
  -5  10  -9  126.09   10.30
   5  10   9  114.29   14.70
   0  11  -9   62.09    9.50
   0  11   9   78.89    9.40
   0 -11   9   81.19    8.90
   0 -11  -9   96.09   13.30
   1 -11   9   80.09    9.00
   1  11  -9   72.09   10.30
  -1 -11  -9   97.39   13.20
  -1  11   9   82.19    9.30
   1  11  -9   80.49   13.80
  -1 -11   9   84.09    9.30
   1  11   9   91.79   12.40
  -1  11  -9   72.99   10.10
   1 -11  -9   94.69   13.60
  -2 -11  -9  196.68   21.30
  -2  11   9  213.48   18.40
   2  11  -9  207.88   24.90
   2 -11  -9  200.08   22.10
  -2 -11   9  194.28   18.40
   2  11   9  184.78   21.20
  -2  11  -9  248.98   25.90
   3  11  -9  184.98   23.70
   3  11   9  182.98   20.30
  -4 -11  -9    7.20    3.90
   4  11  -9    7.80    9.10
   4  11   9    1.70    5.80
  -5 -11  -9   45.00    6.40
   5  11  -9   42.50   10.10
   5  11   9   50.59    8.30
   0  12   9   27.00    7.90
   0 -12   9   35.20    5.60
   0 -12  -9   44.90    9.30
   0  12  -9   37.80   10.10
   1 -12   9  188.28   17.40
  -1 -12  -9  196.58   21.00
  -1 -12   9  185.08   17.50
   1  12   9  186.18   19.00
   1 -12  -9  208.68   21.30
   2  12  -9  147.99   18.80
  -2 -12  -9  118.89   15.60
   2 -12   9  132.79   12.70
   2  12   9  132.09   15.10
   2 -12  -9  131.69   16.80
  -2 -12   9  119.19   12.40
   3  12  -9   39.80   10.80
   3  12   9   25.80    7.20
  -4 -12  -9    4.40    3.30
   4  12  -9   -5.00    7.00
   4  12   9    5.30    5.30
   0 -13   9    4.50    3.30
   0 -13  -9    1.40    6.10
  -1 -13  -9    4.70    6.60
   1 -13   9   15.20    4.00
  -1 -13   9   13.00    3.70
   1 -13  -9   11.10    6.80
   2 -13   9   21.10    4.50
   2  13   9   11.60    5.00
  -2 -13   9   25.20    6.10
   2 -13  -9   30.50    8.40
  -2 -13   9   17.00    3.70
   3  13  -9   33.30    8.60
   3  13   9   37.80    6.80
   0 -14  -9   13.40    6.50
   0 -14   9   15.60    3.90
   1 -14   9  157.78   13.90
  -1 -14  -9  151.38   16.90
  -1 -14   9  131.59   13.50
   1 -14  -9  167.68   16.80
   2 -14  -9   68.49   11.00
   0   0  10 8038.10  718.43
   0   0 -10 9999.00  719.13
   1   0 -10 1366.36  129.49
  -1   0 -10 1798.22  129.49
  -1   0  10 1680.53  128.89
   2   0 -10  863.41   72.99
  -2   0 -10  910.71   72.79
  -2   0  10  919.21   72.19
   3   0 -10 1224.98   97.69
  -3   0  10 1105.19   96.09
  -3   0  10 1308.47   96.69
  -3   0 -10 1173.08   97.19
  -4   0 -10   64.09    8.20
  -4   0  10   58.59    6.20
  -4   0 -10   44.90    6.90
  -4   0 -10   56.69    8.10
   4   0 -10   56.19    7.20
  -5   0  10   71.79   10.30
  -5   0 -10   91.89   11.20
  -5   0 -10   82.89   10.30
  -5   0  10   77.69    7.60
  -6   0  10   31.30    4.80
  -6   0  10   14.90    5.70
  -6   0 -10   15.10    6.40
  -6   0 -10   17.60    4.10
  -6   0 -10   23.30   13.80
  -7   0  10    4.50    3.00
  -7   0 -10    2.30   10.30
  -7   0 -10    3.00    4.60
   0  -1 -10  714.63   56.39
   0   1  10  653.83   55.49
   0  -1  10  708.43   55.69
   1   1 -10  230.88   22.20
  -1   1  10  254.27   21.00
  -1  -1 -10  267.57   22.40
   1   1 -10  295.77   22.70
  -1   1  10  245.68   21.20
  -1  -1  10  250.47   21.60
  -1   1 -10  292.27   22.30
   2   1 -10  603.14   46.60
  -2   1  10  592.74   45.50
  -2   1  10  560.84   45.20
  -2  -1 -10  557.84   46.40
  -2  -1  10  582.94   45.70
  -2   1 -10  557.14   46.00
   2  -1 -10  482.65   46.10
   3   1 -10   64.59    7.20
  -3   1  10   63.49    6.10
  -3  -1 -10   43.30    7.60
  -3   1  10   55.99    5.30
  -3  -1  10   56.09    5.40
  -3   1 -10   64.79    7.80
   3  -1 -10   58.39    6.80
  -3  -1  10   72.29    6.80
  -4  -1 -10  387.66   30.50
   4   1 -10  349.07   30.30
  -4   1  10  351.66   28.60
  -4  -1 -10  348.97   30.00
  -4  -1 -10  357.86   30.80
  -4   1 -10  322.57   28.90
  -4   1 -10  303.57   32.10
  -4   1 -10  345.97   30.70
  -4  -1  10  358.56   29.00
  -5  -1 -10   96.99   10.80
  -5  -1 -10   87.59   10.20
  -5   1  10   64.69    6.50
   5   1 -10   57.79    8.90
  -5   1  10   62.89    9.50
  -5  -1  10   69.19    7.40
  -5   1 -10   72.69   10.50
  -5   1 -10   77.09    7.80
  -5  -1  10   70.29   11.30
  -6   1  10  126.99   12.50
  -6  -1 -10  130.19   14.60
  -6   1  10   90.39   13.40
  -6  -1  10  106.29   13.70
  -6   1 -10  130.29   25.50
  -6   1 -10  110.99   14.70
  -6   1 -10  142.49   11.60
  -7   1  10   21.40    4.30
  -7  -1 -10   20.20    6.10
  -7  -1 -10   21.20    3.90
  -7  -1 -10   17.30   11.20
  -7   1 -10   14.50    5.60
  -7   1 -10   10.60   11.00
   0   2  10  544.35   44.20
   0   2 -10  482.55   45.30
   0  -2  10  571.84   44.60
   0  -2 -10  551.84   45.30
   0   2  10  594.44   44.10
  -1  -2 -10   96.69   11.30
  -1   2  10  105.39    8.80
  -1   2  10   99.19    9.10
   1   2 -10  102.69   10.40
  -1  -2  10  102.99    9.90
  -1   2 -10  137.49   11.10
   1   2  10  104.69    8.70
  -2  -2 -10  790.82   61.69
   2   2 -10  750.52   61.69
  -2   2  10  689.63   60.19
  -2   2  10  753.72   60.49
  -2  -2  10  717.43   60.89
  -2   2 -10  818.22   61.19
  -3   2  10  294.27   23.50
  -3  -2 -10  274.77   25.40
  -3   2  10  256.97   23.10
   3   2 -10  293.07   25.00
  -3   2 -10  325.57   23.10
  -3   2 -10  242.58   24.00
  -3  -2  10  285.37   24.10
  -4  -2 -10   27.10    5.80
  -4  -2 -10   31.80    5.50
  -4  -2 -10   28.30    6.50
  -4   2  10   29.40    3.60
  -4   2  10   18.20    5.00
   4   2 -10   29.50    5.30
  -4   2 -10   26.90    4.00
  -4   2 -10   26.00    6.00
  -4  -2  10   24.60    4.50
  -5   2  10   32.20    5.50
  -5  -2 -10   35.80    7.00
  -5   2  10   17.30    5.70
  -5  -2 -10   40.90    7.00
   5   2 -10   30.30    6.30
  -5  -2  10   32.10    4.90
  -5   2 -10   38.40    5.10
  -5   2 -10   29.50    7.40
  -5   2 -10   45.20   17.20
  -6  -2 -10   12.90    4.40
  -6   2  10   14.70    4.30
  -6   2  10    3.60    4.50
  -6  -2 -10   11.90    5.50
  -6   2 -10   15.00   14.20
  -6  -2  10   10.40    5.30
  -6   2 -10   10.70    5.90
  -6  -2  10   18.70    4.10
  -7  -2 -10   33.60    7.10
  -7   2  10   35.10    5.20
  -7  -2 -10   34.60   12.70
  -7   2 -10   24.90    6.40
  -7   2 -10   45.50   15.10
   0   3  10 1641.74  130.29
   0   3  10 1765.42  130.09
   0   3 -10 1391.66  131.39
   0  -3 -10 1664.23  131.39
   0   3 -10 1692.43  130.59
  -1  -3 -10 1680.23  130.19
   1   3 -10 1585.94  130.29
  -1   3  10 1545.35  128.79
  -1   3  10 1624.14  128.99
   1   3  10 1611.94  128.69
  -1  -3  10 1635.74  129.49
   2   3 -10  442.26   38.70
  -2   3  10  482.35   37.40
  -2   3  10  451.55   37.20
  -2  -3 -10  477.55   39.20
  -2  -3  10  455.25   38.10
   3   3 -10  288.47   24.10
  -3   3  10  269.47   22.20
  -3   3  10  261.27   21.90
  -3  -3 -10  269.97   24.70
  -3  -3  10  263.97   23.10
  -3   3 -10  297.97   21.90
  -3   3 -10  284.37   31.80
  -3   3 -10  230.78   24.60
  -3   3 -10  247.28   22.80
   4   3 -10  117.79   13.10
  -4  -3 -10  136.79   14.00
  -4  -3 -10  157.58   13.20
  -4  -3 -10  131.59   14.70
  -4   3  10  119.49   11.00
  -4   3 -10  146.49   25.00
  -4  -3  10  127.49   12.50
  -4   3 -10  114.89   13.70
  -5   3  10  349.47   30.90
  -5  -3 -10  341.77   30.90
   5   3 -10  348.87   32.10
  -5  -3 -10  423.76   33.00
  -5   3 -10  395.06   45.40
  -5   3 -10  296.27   32.10
  -5  -3  10  376.16   30.30
  -6  -3 -10   13.40    5.60
  -6  -3 -10   14.30    5.00
  -6   3  10   18.30    4.70
  -6   3  10    7.70    4.80
  -6   3 -10    8.00    5.60
  -6  -3  10   24.90    4.50
  -6   3 -10   13.20   13.50
  -7  -3 -10   10.20    5.10
  -7   3  10    7.40    2.90
  -7   3  10    8.10    2.10
  -7  -3 -10   12.20    9.10
  -7   3 -10    2.80   11.30
   0  -4 -10    7.50    5.30
   0   4  10    9.10    1.50
   0   4 -10    6.50    3.30
   0   4  10    7.80    1.70
   0   4 -10    9.70    2.60
  -1  -4 -10 3117.69  245.38
  -1   4  10 3135.39  244.08
   1   4 -10 2959.80  244.38
   1   4 -10 3097.79  245.58
  -1   4  10 2986.80  243.88
  -1   4 -10 3092.09  244.28
  -1  -4  10 2939.51  244.68
   1   4  10 3136.19  243.78
   2   4 -10  314.67   27.50
  -2   4  10  323.97   25.70
  -2   4  10  310.37   25.80
  -2  -4 -10  322.37   28.20
  -2  -4  10  306.27   26.90
  -3   4  10  198.48   18.10
  -3  -4 -10  189.78   20.40
  -3  -4 -10  237.28   21.50
   3   4 -10  236.98   20.50
   3   4 -10  182.78   24.10
  -3   4  10  218.58   18.30
  -3   4 -10  241.98   29.70
  -3   4 -10  249.58   18.20
  -3   4 -10  221.58   19.20
  -3   4 -10  207.98   21.30
  -3  -4  10  224.58   19.70
  -4   4  10  384.26   32.80
  -4  -4 -10  371.96   35.50
  -4  -4 -10  394.36   35.70
  -4  -4 -10  456.95   34.80
   4   4 -10  380.96   35.20
  -4   4 -10  464.85   32.70
  -4  -4  10  400.86   34.20
  -4   4 -10  355.46   34.80
  -4   4 -10  401.76   46.00
  -5  -4 -10  445.66   42.20
  -5   4  10  462.75   41.80
  -5  -4 -10  507.55   43.70
  -5  -4 -10  545.15   42.90
  -5  -4  10  497.55   41.40
  -5   4 -10  517.35   56.19
  -6   4  10  112.79   11.60
  -6  -4 -10  113.99   13.10
  -6  -4 -10  101.99   13.20
  -6   4 -10  105.59   24.60
  -7   4  10   72.69    6.30
  -7   4  10   60.29    7.10
  -7  -4 -10   61.09    9.20
  -7  -4  10   70.99    6.80
   0   5 -10    1.50    2.90
   0   5 -10    2.40    2.20
   0  -5 -10    5.20    5.20
   0   5  10    1.70    1.00
   0   5  10    3.40    1.60
   1   5 -10   64.79    8.40
   1   5 -10   65.09    7.50
  -1   5  10   77.59    6.30
  -1   5  10   66.59    6.50
  -1  -5 -10   70.39    9.80
  -1  -5  10   63.39    8.40
   1   5  10   75.29    6.10
  -1   5 -10   66.29    7.10
  -2   5  10  374.66   30.20
  -2   5  10  383.36   30.10
   2   5 -10  389.86   32.20
  -2  -5 -10  375.26   32.70
   2   5 -10  298.27   37.70
  -2  -5  10  359.86   31.50
  -2   5 -10  354.96   40.40
  -3  -5 -10  225.38   20.80
   3   5 -10  199.68   19.10
   3   5 -10  186.28   23.60
  -3   5  10  209.58   16.90
  -3   5  10  197.38   16.70
  -3  -5 -10  168.78   22.60
  -3   5 -10  156.98   20.00
  -3   5 -10  210.88   16.90
   3   5  10  214.98   22.50
  -3   5 -10  224.78   18.20
  -3  -5  10  218.48   18.80
  -3   5 -10  187.58   29.30
   4   5 -10   38.00   11.80
  -4   5  10   39.80    4.40
   4   5 -10   44.80    7.30
  -4  -5 -10   34.50    7.10
  -4  -5 -10   30.30    8.30
  -4  -5 -10   45.10    6.90
  -4   5 -10   37.50    7.30
  -4  -5  10   38.80    6.60
  -4   5 -10   32.50   16.90
  -4   5 -10   43.60    4.20
  -5  -5 -10  140.79   16.30
  -5  -5 -10  152.68   15.00
  -5  -5 -10  147.49   16.20
  -5   5 -10  111.09   25.90
  -5  -5  10  131.79   14.10
  -6  -5 -10    0.40    4.10
  -6   5  10    4.00    3.40
  -6  -5 -10   -2.10    4.00
  -6   5 -10    4.30    1.20
  -6  -5  10    3.10    2.80
  -7   5  10   82.09    8.00
  -7  -5 -10   70.69    9.70
  -7  -5  10   96.79    8.40
   0   6  10  775.22   61.89
   0   6  10  782.52   62.29
   0   6 -10  752.62   62.59
  -1  -6 -10  166.28   18.60
   1   6 -10  162.28   16.00
  -1  -6 -10  197.08   17.70
  -1   6  10  193.58   15.50
  -1   6  10  193.98   15.20
   1   6 -10  165.58   17.20
   1   6 -10  141.99   20.00
   1   6  10  189.68   15.00
   1   6  10  209.48   18.60
  -1   6 -10  175.48   15.80
   2   6 -10  120.49   18.70
  -2  -6 -10  150.08   15.40
  -2   6  10  153.48   12.40
  -2  -6 -10  152.98   16.60
  -2   6  10  154.58   12.70
   2   6 -10  143.49   14.70
   2   6  10  160.98   16.70
  -2   6 -10  119.69   12.80
  -2  -6  10  159.48   12.90
  -2   6 -10  127.19   17.30
  -2  -6  10  141.49   14.80
  -3   6  10  677.13   53.59
  -3   6  10  648.14   53.49
  -3  -6 -10  719.33   56.69
   3   6 -10  646.14   55.99
   3   6 -10  563.04   58.69
  -3  -6  10  636.44   55.09
   3   6  10  702.13   57.19
  -3   6 -10  746.53   54.49
  -3   6 -10  620.14   56.89
  -3   6 -10  634.54   66.79
   4   6 -10   53.09   14.60
  -4   6  10   51.99    5.90
  -4  -6 -10   62.89   11.10
  -4  -6 -10   70.79    8.30
   4   6 -10   52.39    8.80
  -4  -6 -10   58.49    9.80
  -4   6 -10   54.59   19.00
  -4  -6  10   50.29    8.40
  -4   6 -10   66.49    5.90
  -4   6 -10   67.89   10.30
  -5  -6 -10    1.80    4.30
  -5  -6 -10    4.20    3.80
   5   6 -10    2.20   15.90
  -5  -6 -10    0.60    6.40
  -5  -6  10   -0.10    4.40
  -5  -6  10   -0.10    2.90
  -5   6 -10    2.00    1.20
  -6   6  10   85.89    9.90
  -6  -6 -10   81.79   12.20
  -6  -6 -10   85.59   10.90
  -6  -6  10   97.49   10.00
  -7  -6  10   15.00    3.00
   0   7  10   66.19    6.80
   0   7 -10   63.59    7.50
   0   7 -10   62.19   11.50
   0   7  10   65.29    6.10
   0   7 -10   49.80   10.90
   0  -7 -10   78.49    9.90
   0  -7  10   64.49    6.60
   0   7  10   83.89   10.20
  -1  -7 -10   34.90    8.50
  -1   7  10   36.80    4.50
   1  -7  10   29.10    4.20
   1   7 -10   28.30    9.50
  -1   7  10   36.00    3.90
   1   7 -10   31.00    6.50
   1   7 -10   29.60    5.00
  -1  -7 -10   29.20    6.40
   1   7  10   33.80    5.00
  -1   7 -10   28.60    4.70
   1   7  10   32.60    3.60
  -1  -7  10   37.50    4.40
   1  -7 -10   49.50    7.80
   1   7  10   31.20    7.30
  -2  -7 -10  363.76   30.70
  -2  -7 -10  319.37   31.40
  -2   7  10  380.96   28.40
  -2   7  10  367.26   28.00
   2   7 -10  327.07   30.50
   2   7 -10  289.07   33.10
   2   7  10  361.06   31.60
  -2  -7  10  325.07   30.20
  -2   7 -10  304.57   28.40
  -2   7 -10  286.07   32.20
  -2  -7  10  379.96   28.50
   3   7 -10  138.49   15.80
  -3   7  10  151.18   13.00
   3   7 -10  128.49   20.30
  -3  -7 -10  164.78   18.30
  -3   7  10  158.68   13.30
  -3   7 -10  151.28   18.00
  -3  -7  10  158.68   13.60
   3   7  10  165.48   18.40
  -3  -7  10  127.09   15.70
  -4  -7 -10  379.26   39.10
   4   7 -10  371.86   42.30
  -4  -7 -10  456.85   37.30
  -4   7  10  396.56   35.30
  -4  -7  10  378.46   37.30
   4   7  10  471.25   40.10
  -4   7 -10  507.35   38.60
  -4   7 -10  459.05   35.40
  -5  -7 -10   48.70   10.10
  -5  -7 -10   38.60    7.10
   5   7 -10   40.30   13.70
  -5  -7 -10   44.00    9.00
  -5  -7  10   40.40    7.00
  -5  -7  10   41.30    7.60
  -5   7 -10   50.79    4.60
  -6  -7 -10  105.49   11.50
  -6  -7 -10   96.59   13.30
  -6   7  10   98.99   10.50
  -6  -7  10  105.19   10.90
   0   8 -10  186.38   17.10
   0  -8 -10  216.98   19.30
   0   8  10  187.08   16.60
   0  -8  10  181.18   16.40
   0   8  10  210.08   18.80
   0   8 -10  182.48   20.80
   0   8  10  177.58   15.90
  -1   8  10   40.10    4.90
   1   8 -10   23.00    9.90
  -1  -8 -10   30.50    6.60
  -1  -8 -10   39.10    9.00
   1   8 -10   29.80    5.30
   1  -8  10   31.00    4.40
  -1   8  10   36.60    4.10
  -1   8 -10   28.70    4.90
   1  -8 -10   40.90    7.50
   1   8  10   29.80    7.30
   1   8  10   36.20    3.90
  -1  -8  10   28.70    4.50
  -2  -8 -10   32.40    8.80
   2   8 -10   18.00    9.90
  -2   8  10   24.50    4.00
   2   8 -10   19.70    5.90
  -2  -8 -10   26.00    6.90
  -2   8  10   27.50    3.70
  -2  -8  10   30.50    7.30
  -2   8 -10   27.80    9.20
   2   8  10   29.60    7.80
  -2  -8  10   26.10    4.20
  -2   8 -10   21.20    4.30
  -3   8  10  139.09   13.40
   3   8 -10  130.69   16.40
  -3  -8 -10  156.88   18.60
  -3   8  10  165.38   13.70
   3   8 -10  154.28   22.80
  -3   8 -10  171.58   19.20
  -3  -8  10  158.08   17.00
  -3  -8  10  157.58   13.90
   3   8  10  155.08   18.60
   4   8 -10  278.17   35.20
  -4  -8 -10  331.27   28.60
  -4  -8 -10  299.47   30.90
  -4   8  10  338.67   26.70
  -4  -8  10  291.27   29.10
   4   8  10  355.66   31.80
  -5  -8 -10  215.48   25.10
   5   8 -10  222.08   28.60
  -5  -8 -10  251.67   23.20
   5   8  10  228.58   25.40
  -5   8 -10  295.67   21.10
  -6   8  10   67.69    7.70
  -6  -8 -10   61.59   10.20
  -6  -8 -10   66.69    8.50
   6   8 -10   82.09   13.50
  -6  -8  10   67.99    8.20
   0  -9 -10    5.70    5.20
   0   9 -10    4.70    3.60
   0   9  10    8.70    4.90
   0  -9  10    5.70    2.50
   0   9  10    7.30    3.00
   1  -9  10   19.70    3.60
  -1   9  10   23.80    3.40
  -1  -9 -10   21.10    6.40
  -1   9  10   23.00    4.10
   1   9 -10   18.30    9.50
   1   9 -10   17.50    4.80
   1   9  10   21.10    6.70
  -1   9 -10   21.40    4.60
  -1  -9  10   23.30    4.00
   1  -9 -10   21.10    6.60
  -2   9  10   67.99    6.70
  -2  -9 -10   70.69   11.60
  -2   9  10   65.59    7.20
   2   9 -10   48.00   13.60
  -2  -9 -10   65.89   10.20
  -2   9 -10   60.29   12.60
  -2  -9  10   61.19    7.20
   2  -9 -10   83.49   11.40
  -2   9 -10   44.80    7.10
   2   9  10   60.19   10.90
   3   9 -10   58.19   14.90
  -3   9  10   70.59    7.00
  -3  -9 -10   63.99   12.10
   3   9  10   59.39   11.40
  -3  -9  10   55.89    7.10
  -3   9 -10   73.29   12.80
  -3  -9  10   39.10    9.20
  -4   9  10   90.49    9.20
   4   9 -10   88.49   17.70
  -4  -9 -10   92.79   10.70
  -4  -9 -10   93.69   13.80
   4   9  10   87.29   13.70
  -4  -9  10   79.29   11.70
  -5  -9 -10   39.50    9.40
   5   9 -10   45.20   12.70
  -5  -9 -10   45.70    7.60
  -5   9 -10   61.29    5.20
   5   9  10   51.89    9.90
  -6  -9 -10   16.80    6.00
  -6  -9 -10   23.10    4.90
   0 -10 -10   64.39   10.30
   0  10  10   47.50    8.20
   0  10  10   57.49    7.40
   0  10 -10   55.89    8.00
   0 -10  10   51.19    6.60
   1  10 -10  265.17   25.90
   1  10 -10  290.47   30.50
  -1  10  10  280.87   25.20
  -1 -10 -10  324.57   28.40
   1 -10  10  297.27   25.00
  -1 -10  10  309.57   25.30
   1 -10 -10  314.77   28.30
   1  10  10  291.17   27.80
  -1  10 -10  263.27   25.50
   2  10 -10   80.39   15.40
  -2 -10 -10   61.19   14.70
  -2  10  10   79.59    8.50
  -2 -10 -10   85.19   12.40
   2  10  10   64.49   11.40
  -2  10 -10   89.49   15.30
  -2 -10  10   77.59    8.60
  -2  10 -10   59.79    8.90
   2 -10 -10   93.69   13.00
  -3 -10 -10  263.67   29.30
  -3  10  10  323.47   25.60
   3  10 -10  302.67   33.20
   3  10  10  320.77   29.80
  -3 -10  10  265.47   29.20
   4  10 -10   10.60   10.90
  -4 -10 -10   20.10    5.10
   4  10  10   17.10    7.80
  -5 -10 -10  121.29   12.80
   5  10 -10  148.39   19.00
   5  10  10  130.59   15.10
   0 -11 -10  451.65   36.60
   0  11 -10  347.17   33.70
   0 -11  10  402.76   33.20
   0  11  10  376.86   33.40
  -1 -11 -10  382.46   33.00
  -1  11  10  350.76   29.90
   1  11 -10  345.17   33.90
   1 -11  10  352.46   29.70
   1  11 -10  290.07   30.30
   1  11  10  354.86   31.80
  -1  11 -10  308.07   30.10
  -1 -11  10  371.86   29.90
   1 -11 -10  393.16   33.20
   2  11 -10   35.40   11.70
  -2  11  10   34.00    5.40
  -2 -11 -10   35.90    8.60
   2  11  10   33.20    8.10
  -2  11 -10   28.30    5.70
  -2  11 -10   39.00   11.40
   2 -11 -10   33.50    9.10
  -2 -11  10   34.10    5.40
   3  11 -10   48.20   13.00
   3  11  10   35.80    8.80
   4  11 -10   28.60   10.50
  -4 -11 -10   25.70    5.30
   4  11  10   20.10    7.10
  -5 -11 -10   10.20    4.20
   5  11 -10   13.40    7.70
   5  11  10    8.30    5.60
   0 -12  10  509.95   43.80
   0 -12 -10  548.35   46.70
  -1 -12 -10  543.25   46.60
   1 -12  10  505.65   43.50
  -1 -12  10  524.15   43.70
   1 -12 -10  546.25   46.70
   1  12  10  508.55   44.70
   2 -12  10   46.30    6.90
  -2 -12 -10   56.99   10.30
   2  12 -10   61.39   11.80
   2  12  10   43.70    8.40
   2 -12 -10   52.79   10.60
  -2 -12  10   50.69    6.70
   3  12 -10   40.00   10.80
   3  12  10   34.30    7.50
   4  12 -10   35.00    9.40
  -4 -12 -10   33.20    5.40
   4  12  10   28.00    6.80
   0 -13 -10  119.69   15.80
   0 -13  10  120.99   12.00
   1 -13  10   21.70    4.50
  -1 -13 -10   28.30    7.90
  -1 -13  10   19.70    4.30
   1 -13 -10   23.20    7.70
   2 -13  10  108.69   10.70
  -2 -13  10   83.69    9.90
   2 -13 -10  113.69   14.50
   2  13  10  102.29   11.70
  -2 -13  10  127.79   12.40
   3  13 -10   37.20    9.10
  -3 -13 -10   48.40    6.20
   3  13  10   43.80    7.10
   0 -14  10    0.40    2.70
   0 -14 -10    0.20    5.60
   1 -14  10   13.60    3.70
  -1 -14 -10   12.60    6.50
  -1 -14  10   16.10    5.50
   1 -14 -10   12.00    6.60
  -1 -14  10   12.90    3.40
   0   0  11    0.20    1.40
   0   0 -11   -1.60    3.40
  -1   0  11 2010.70  165.58
  -1   0 -11 2089.09  166.08
   1   0 -11 2116.39  166.28
  -2   0  11  536.55   40.70
  -2   0 -11  507.65   41.40
   2   0 -11  456.45   41.50
  -3   0  11   36.70    4.80
  -3   0  11   35.50    3.60
   3   0 -11   37.90    5.50
  -3   0 -11   31.40    5.70
   4   0 -11  194.68   18.60
  -4   0 -11  188.78   18.30
  -4   0 -11  194.18   19.40
  -4   0  11  217.08   17.20
  -5   0  11  603.94   48.30
  -5   0 -11  576.24   50.49
  -5   0 -11  605.64   51.79
  -6   0 -11   99.99   22.00
  -6   0 -11   79.89   12.00
  -6   0 -11   84.09    9.30
  -7   0 -11   13.10   10.90
  -7   0 -11    4.20    4.50
   0   1  11 1513.75  131.79
   0  -1  11 1681.53  131.99
   0  -1 -11 1761.02  132.79
  -1  -1 -11 1784.82  136.19
   1   1 -11 1483.45  136.29
  -1   1  11 1630.44  135.29
  -1   1  11 1655.53  135.19
  -1  -1  11 1704.53  135.59
  -1   1 -11 1914.01  136.09
  -2  -1 -11  319.47   26.90
  -2   1  11  309.37   25.60
   2   1 -11  316.97   26.90
  -2   1  11  302.37   25.30
  -2   1 -11  306.77   26.40
  -2  -1  11  318.87   26.00
  -3  -1 -11 1375.36  107.09
  -3   1  11 1269.17  105.49
  -3   1  11 1455.25  105.89
   3   1 -11 1366.96  107.39
  -3   1 -11 1274.27  106.49
  -3  -1  11 1432.36  106.19
   3  -1 -11 1201.28  106.79
  -3  -1  11 1194.48  105.49
  -4   1  11  665.23   48.80
  -4  -1 -11  594.24   51.09
  -4  -1 -11  563.04   49.99
   4   1 -11  609.24   50.69
  -4   1 -11  495.65   49.10
  -4   1 -11  587.64   51.09
  -4  -1  11  683.03   49.20
  -5  -1 -11  421.36   34.40
  -5   1  11  358.56   31.20
  -5  -1 -11  408.56   34.40
   5   1 -11  402.16   38.60
  -5   1 -11  358.16   33.00
  -5   1 -11  368.86   32.30
  -5  -1  11  386.76   31.70
  -6  -1 -11   53.79    9.30
  -6   1 -11   52.39   17.10
  -6   1 -11   49.70    6.40
  -6   1 -11   39.80    8.60
  -7  -1 -11   11.10   10.40
  -7  -1 -11    6.30    4.60
  -7   1  11    4.40    3.10
  -7  -1 -11    8.20    2.80
  -7   1 -11    6.80   10.70
  -7   1 -11    5.40    7.50
   0   2  11 1962.10  160.98
   0   2  11 2112.49  160.88
   0  -2  11 2055.99  161.38
   0  -2 -11 1931.31  161.88
  -1   2  11 1092.59   86.69
  -1   2  11 1077.89   86.49
  -1  -2 -11 1118.79   87.69
   1   2 -11  984.40   87.79
   1   2  11 1095.59   86.39
  -1  -2  11 1115.19   87.09
   2   2 -11  310.77   26.40
  -2   2  11  297.57   24.70
  -2   2  11  302.07   25.00
  -2  -2 -11  301.47   26.60
  -2  -2  11  302.77   25.50
  -2   2 -11  311.47   25.90
   3   2 -11  217.28   19.40
  -3   2  11  229.58   17.80
  -3   2  11  203.18   17.40
  -3  -2 -11  230.48   20.20
  -3   2 -11  178.58   20.20
  -3  -2  11  223.98   18.50
  -3   2 -11  200.18   18.60
   4   2 -11  138.09   13.90
  -4   2  11  142.59   11.90
  -4  -2 -11  130.99   15.10
  -4  -2 -11  147.19   13.70
  -4  -2 -11  128.99   14.50
  -4   2 -11  129.79   14.70
  -4  -2  11  131.99   12.70
  -4   2 -11  127.49   14.20
   5   2 -11  306.97   29.50
  -5   2  11  286.97   26.40
  -5  -2 -11  346.57   30.10
  -5  -2 -11  370.06   29.70
  -5   2 -11  336.07   27.70
  -5   2 -11  319.27   41.50
  -5  -2  11  330.27   27.40
  -6  -2 -11  169.98   16.30
  -6  -2 -11  187.68   17.90
  -6   2 -11  194.78   31.30
  -6   2 -11  133.19   17.50
  -7  -2 -11   82.39   11.00
  -7   2  11   92.99    9.20
  -7  -2 -11   72.19   16.10
  -7   2 -11  100.09   20.20
   0   3  11   28.00    2.80
   0   3 -11   23.70    4.80
   0   3  11   25.50    3.20
   0  -3 -11   27.50    6.00
  -1   3  11  284.17   23.90
  -1  -3 -11  303.87   26.10
  -1   3  11  307.47   24.10
   1   3 -11  284.57   25.60
   1   3  11  290.37   23.80
  -1  -3  11  294.47   24.80
   2   3 -11 1660.63  139.39
  -2  -3 -11 1724.63  139.29
  -2   3  11 1640.84  137.69
  -2   3  11 1733.33  137.89
  -2   3 -11 1970.70  138.79
  -2  -3  11 1623.04  138.39
  -3  -3 -11  191.88   18.90
  -3  -3 -11  183.68   19.00
   3   3 -11  196.68   18.30
  -3   3  11  198.58   16.40
  -3   3  11  182.98   16.10
  -3   3 -11  220.18   16.10
  -3   3 -11  177.68   19.50
  -3   3 -11  227.68   27.50
  -3   3 -11  167.18   17.10
  -3  -3  11  198.88   17.40
  -4  -3 -11  148.69   15.80
  -4  -3 -11  137.39   15.00
  -4  -3 -11  154.78   13.80
   4   3 -11  136.79   14.30
  -4   3  11  130.69   11.90
  -4  -3  11  143.39   13.20
  -4   3 -11  119.79   14.90
  -4   3 -11  141.29   25.60
  -5  -3 -11  282.87   26.30
  -5  -3 -11  313.67   25.60
  -5  -3 -11  247.68   24.40
  -5   3 -11  258.17   38.30
  -5  -3  11  256.87   23.50
  -6  -3 -11  216.48   20.60
  -6   3  11  208.58   20.00
  -6  -3 -11  196.98   20.10
  -6   3 -11  202.08   33.20
  -7   3  11   83.09    8.60
  -7  -3 -11  102.69   17.10
  -7  -3 -11   69.69   10.10
  -7   3 -11  102.39   20.60
   0  -4 -11  760.52   66.39
   0   4 -11  677.13   66.29
   0   4  11  847.02   64.99
   0   4  11  908.41   64.79
   0   4 -11  840.82   65.39
  -1  -4 -11 1068.99   83.09
   1   4 -11  960.60   82.99
  -1   4  11 1054.59   81.19
   1   4 -11  934.81   81.79
  -1   4  11 1054.99   81.49
  -1  -4  11  984.30   82.09
   1   4  11 1045.90   81.09
  -2   4  11  180.68   14.60
   2   4 -11  178.28   16.70
  -2   4  11  176.68   14.90
  -2  -4 -11  168.88   17.70
  -2   4 -11  151.08   23.50
  -2  -4  11  181.18   16.10
  -3  -4 -11  319.97   31.10
  -3  -4 -11  340.87   31.40
   3   4 -11  370.06   31.00
  -3   4  11  387.86   28.80
  -3   4  11  355.76   28.60
   3   4 -11  296.47   34.20
  -3   4 -11  343.07   39.60
  -3   4 -11  336.57   29.50
  -3   4 -11  284.97   31.50
  -3   4 -11  383.96   28.60
  -3  -4  11  378.46   30.00
  -4  -4 -11   64.59    9.70
  -4  -4 -11   72.89    8.50
  -4  -4 -11   78.99   11.10
  -4   4  11   59.89    6.10
   4   4 -11   59.39    8.60
  -4  -4  11   60.89    8.40
  -4   4 -11   62.79   10.20
  -4   4 -11   67.99   20.20
  -5  -4 -11  277.77   27.80
  -5  -4 -11  297.27   28.80
  -5  -4 -11  356.56   28.10
  -5   4 -11  312.47   41.50
  -5  -4  11  281.57   26.30
  -6   4  11  379.86   33.50
  -6  -4 -11  375.46   34.80
  -6  -4 -11  401.46   34.60
  -6   4 -11  411.56   48.50
  -7  -4 -11    2.30    8.40
  -7  -4 -11    2.10    4.20
  -7   4  11    4.00    2.50
  -7  -4  11    4.70    1.90
   0   5  11   73.59    6.90
   0   5  11   80.09    6.50
   0  -5 -11   56.89   11.00
   0   5 -11   74.99    7.80
   0   5 -11   67.99    9.00
   1   5 -11  761.12   67.09
   1   5 -11  774.92   65.79
  -1   5  11  868.61   65.19
  -1   5  11  859.01   65.49
  -1  -5 -11  793.72   67.19
  -1   5 -11  782.52   65.69
  -1  -5  11  765.82   66.19
   1   5  11  874.61   65.09
  -2   5  11 1522.05  121.19
  -2   5  11 1512.05  120.99
  -2  -5 -11 1488.75  122.99
   2   5 -11 1479.75  123.09
   2   5  11 1617.64  123.79
  -2  -5  11 1431.36  122.09
  -2   5 -11 1408.06  129.99
  -2  -5  11 1614.44  121.29
  -3   5  11   87.69    7.90
  -3  -5 -11   93.69   12.50
   3   5 -11   84.39   10.30
   3   5 -11   75.19   14.70
  -3   5  11   84.39    7.70
  -3   5 -11   91.39    7.70
  -3  -5  11   82.69   10.10
  -3   5 -11   86.39   19.60
   3   5  11   84.89   12.90
  -3   5 -11   70.79   12.30
  -3   5 -11   84.19    9.60
  -4  -5 -11  555.54   49.99
   4   5 -11  528.55   49.40
  -4  -5 -11  574.44   49.80
   4   5 -11  481.25   52.39
  -4   5  11  542.95   46.60
  -4  -5 -11  667.93   48.70
  -4  -5  11  555.44   48.10
  -4   5 -11  664.03   46.60
  -4   5 -11  564.84   49.30
  -4   5 -11  578.34   61.79
  -5  -5 -11   93.99   11.90
  -5  -5 -11   76.29   12.80
  -5  -5 -11   85.99   12.80
  -5  -5  11  122.69   12.00
  -5  -5  11   85.89   11.10
  -5   5 -11  120.69    9.00
  -5   5 -11   63.79   21.60
  -6   5  11   74.09    9.60
  -6  -5 -11   74.69   11.70
  -6  -5 -11   79.59   10.70
  -6  -5  11   96.99    9.60
  -7  -5 -11   42.70    7.10
  -7  -5  11   44.40    5.10
   0   6 -11   35.50    5.00
   0  -6 -11   37.20    6.70
   0   6  11   33.00    6.20
   0   6  11   36.10    3.50
   0   6  11   28.10    3.90
   0   6 -11   22.10    5.60
  -1  -6 -11  188.78   20.60
   1   6 -11  183.28   18.20
   1   6 -11  177.88   22.90
  -1   6  11  207.38   17.20
  -1  -6 -11  226.98   20.10
   1   6 -11  187.78   19.50
  -1   6  11  215.28   17.60
  -1   6 -11  195.98   18.00
   1  -6 -11  248.98   21.00
   1   6  11  214.48   17.10
   1   6  11  231.78   20.50
  -1  -6  11  215.58   17.70
  -2   6  11   64.29    6.80
  -2   6  11   64.19    6.40
  -2  -6 -11   75.39   10.10
   2   6 -11   62.39    8.90
   2   6 -11   77.49   13.70
  -2  -6 -11   80.59   11.20
   2   6  11   75.99   10.70
  -2  -6  11   74.49    7.00
  -2  -6  11   68.99    9.10
  -2   6 -11   67.09   12.20
   3   6 -11   36.00   11.60
  -3   6  11   37.00    4.30
  -3  -6 -11   44.70    9.10
   3   6 -11   34.50    7.10
  -3   6  11   41.30    4.60
  -3   6 -11   23.10   14.90
   3   6  11   43.50    9.00
  -3  -6  11   34.00    6.70
  -3   6 -11   28.30    8.40
  -3   6 -11   47.60    6.80
   4   6 -11  605.34   56.89
  -4  -6 -11  608.54   57.39
   4   6 -11  572.54   60.19
  -4   6  11  625.04   53.89
  -4  -6 -11  651.63   57.19
  -4  -6 -11  760.52   55.99
   4   6  11  751.32   63.69
  -4   6 -11  733.13   56.99
  -4   6 -11  719.73   53.99
  -4  -6  11  638.04   55.59
  -5  -6 -11  370.76   29.20
   5   6 -11  295.77   34.60
  -5  -6 -11  331.17   30.20
  -5  -6 -11  295.87   30.50
  -5  -6  11  303.47   28.20
  -6   6  11  158.88   16.10
  -6  -6 -11  158.18   18.30
  -6  -6 -11  163.38   17.00
  -6  -6  11  198.48   16.40
   0  -7  11  234.98   19.50
   0   7  11  239.38   19.60
   0   7 -11  214.48   20.00
   0   7  11  246.18   21.70
   0  -7 -11  264.07   22.20
   0   7 -11  178.38   23.60
   0   7  11  220.08   19.00
   1   7 -11  160.08   18.30
  -1  -7 -11  179.28   20.00
  -1  -7 -11  210.28   19.20
   1   7 -11  168.48   17.10
   1  -7  11  189.68   16.40
  -1   7  11  214.98   16.60
   1   7 -11  173.28   22.00
  -1   7  11  195.78   16.10
   1   7  11  193.68   19.30
  -1  -7  11  211.78   16.60
  -1   7 -11  175.58   16.80
   1   7  11  196.48   15.90
   1  -7 -11  201.28   19.20
  -2   7  11   93.89    8.20
  -2  -7 -11   94.09   13.00
  -2  -7 -11  107.29   12.40
   2   7 -11   76.49   14.40
   2   7 -11   81.69   11.10
  -2   7  11   90.19    8.60
  -2   7 -11   72.09    9.00
   2   7  11  103.39   13.40
  -2  -7  11   93.39    8.70
  -2   7 -11   88.59   14.80
  -2  -7  11   91.29   11.60
  -3   7  11  253.67   20.20
  -3   7  11  227.18   19.90
   3   7 -11  214.88   22.80
   3   7 -11  193.78   27.40
  -3  -7 -11  260.67   24.50
  -3  -7  11  223.58   22.30
   3   7  11  247.58   24.40
  -3  -7  11  249.38   20.50
  -3   7 -11  257.07   25.30
  -4  -7 -11    2.20    7.30
  -4   7  11    7.00    2.20
  -4  -7 -11   11.80    4.30
   4   7 -11    6.50   10.80
  -4   7 -11    8.30    2.10
   4   7  11   16.10    7.70
  -4  -7  11   12.60    5.60
  -4   7 -11   12.60    6.10
  -5  -7 -11   52.79   10.60
  -5  -7 -11   65.39    9.20
   5   7 -11   64.29   15.10
  -5  -7  11   54.69    8.30
  -5   7 -11   74.09    6.10
  -6  -7 -11    3.50    3.90
  -6  -7 -11    0.40    4.70
  -6  -7  11    0.20    2.50
  -6   7 -11    4.20    1.20
   0   8 -11  110.69   16.10
   0   8  11  124.79   13.50
   0   8  11  129.59   11.20
   0  -8  11  113.29   10.80
   0   8 -11  111.29   11.70
   0  -8 -11  117.69   13.80
   0   8  11  113.09   10.30
  -1   8  11  267.27   21.40
   1   8 -11  200.08   24.40
   1  -8  11  241.08   21.10
   1   8 -11  226.68   27.10
  -1  -8 -11  272.17   24.10
  -1   8  11  254.77   20.80
  -1  -8 -11  227.68   25.20
   1   8 -11  242.38   22.00
   1   8  11  278.37   24.40
   1   8  11  242.18   20.60
   1  -8 -11  276.47   24.20
  -1  -8  11  263.37   21.30
  -1   8 -11  245.38   21.70
  -2  -8 -11  305.57   27.90
  -2  -8 -11  274.37   28.90
   2   8 -11  274.27   31.30
  -2   8  11  318.47   24.90
  -2   8  11  317.07   25.30
   2   8  11  295.27   28.60
  -2  -8  11  290.57   27.60
  -2   8 -11  248.68   25.40
  -2  -8  11  321.87   25.40
  -2   8 -11  295.57   30.70
   2  -8 -11  325.07   28.40
   3   8 -11  365.16   38.10
   3   8 -11  429.26   42.90
  -3   8  11  444.76   35.50
  -3  -8 -11  386.56   38.70
  -3   8 -11  473.85   40.70
  -3  -8  11  419.56   36.60
  -3  -8  11  437.46   37.90
   3   8  11  501.55   40.00
  -4  -8 -11  602.64   54.09
   4   8 -11  600.44   58.19
  -4   8  11  591.74   50.49
  -4  -8 -11  702.53   52.59
   4   8  11  675.23   54.89
  -4  -8  11  550.54   52.49
   5   8 -11   76.39   16.00
  -5  -8 -11   74.89    9.60
  -5  -8 -11   58.29   11.10
   5   8  11   63.09   11.50
  -5   8 -11   76.79    6.70
  -6  -8 -11   12.10    5.70
   6   8 -11   23.70    9.30
  -6  -8 -11   20.00    4.90
  -6   8 -11   22.50    2.40
  -6  -8  11   17.50    4.20
   0   9  11   95.99    9.50
   0   9 -11   97.09   11.20
   0   9  11  112.69   10.60
   0   9  11  109.49   12.60
   0  -9  11  100.49   10.00
   0  -9 -11  118.19   14.00
   1   9 -11  426.06   40.60
   1  -9  11  415.56   35.40
  -1  -9 -11  452.85   38.40
  -1   9  11  420.96   35.10
   1   9 -11  380.96   36.10
  -1   9  11  448.06   35.70
  -1  -9  11  469.95   35.70
   1   9  11  442.36   38.10
  -1   9 -11  366.96   35.80
   1  -9 -11  454.75   38.50
   2   9 -11   63.59   14.70
  -2  -9 -11   58.79   11.20
  -2   9  11   59.99    7.10
  -2  -9 -11   67.69   10.50
  -2   9 -11   47.40    7.30
   2   9  11   57.89   10.50
   2  -9 -11   70.29   11.10
  -2   9 -11   73.29   13.60
  -2  -9  11   64.49    7.30
   3   9 -11  807.92   78.59
  -3   9  11  902.41   72.49
   3   9  11  976.00   76.19
  -3  -9  11  877.31   72.69
   4   9 -11  294.67   34.00
  -4  -9 -11  314.07   27.10
   4   9  11  290.97   29.70
  -5  -9 -11   47.70    7.20
  -5  -9 -11   30.80    8.60
   5   9 -11   51.79   12.60
  -5   9 -11   46.30    4.50
   5   9  11   43.90    9.10
   0 -10  11  525.15   43.00
   0  10  11  511.35   44.20
   0  10  11  536.25   43.40
   0  10 -11  451.05   43.50
   0 -10 -11  582.04   46.30
   1 -10  11  317.87   26.50
   1  10 -11  314.77   32.20
   1  10 -11  257.77   27.20
  -1  10  11  311.37   26.80
  -1 -10 -11  336.07   29.80
   1 -10 -11  340.97   30.10
  -1  10 -11  261.27   26.90
  -1 -10  11  330.57   26.70
   1  10  11  344.17   29.30
  -2 -10 -11   15.60    7.00
   2  10 -11   14.90   10.40
  -2  10  11   11.70    3.50
  -2  10 -11   11.90    9.30
   2 -10 -11   19.40    7.80
  -2 -10  11   17.00    3.80
  -2  10 -11   14.10    4.20
   2  10  11   15.00    6.90
   3  10 -11   32.20   12.50
  -3 -10 -11   20.90    9.00
   3  10  11   25.30    8.40
  -3  10 -11   44.30   10.70
   4  10 -11   54.89   13.90
  -4 -10 -11   55.99    7.80
   4  10  11   46.50    9.80
  -5 -10 -11   49.70    6.80
   5  10 -11   44.20   11.30
   5  10  11   37.90    8.00
   0 -11 -11   79.79   12.40
   0  11  11   85.99    9.60
   0 -11  11   77.49    8.80
   0  11 -11   75.99   10.50
  -1  11  11   77.59    8.60
   1 -11  11   74.49    8.20
   1  11 -11   58.19    9.30
  -1 -11 -11   68.89   11.20
   1  11  11   62.79   10.10
   1 -11 -11   87.69   12.90
  -1 -11  11   77.39    8.40
  -1  11 -11   55.29    8.70
  -2 -11 -11  126.39   16.70
  -2  11  11  129.59   13.20
   2  11 -11  143.89   21.00
  -2 -11  11  135.19   13.20
   2  11  11  135.99   16.30
   2 -11 -11  134.09   17.70
  -2  11 -11  196.88   21.90
   3  11 -11   30.20   12.00
   3  11  11   29.80    7.80
   4  11 -11   17.90    9.80
  -4 -11 -11   23.40    5.00
   4  11  11   20.70    7.00
   0 -12  11  236.18   21.40
   0 -12 -11  255.57   24.90
   1 -12  11   13.60    3.80
  -1 -12 -11   18.50    7.30
  -1 -12  11   14.60    3.90
   1  12  11   12.20    5.10
   1 -12 -11   16.70    7.50
   2  12 -11   63.69   11.90
   2 -12  11   51.79    7.40
  -2  12 -11   75.99   14.10
  -2 -12  11   62.99    7.20
   2  12  11   53.99    9.00
   2 -12 -11   60.19   11.30
   3  12 -11    0.20    7.90
   3  12  11   -0.10    4.80
   4  12 -11   32.80    8.70
  -4 -12 -11   25.90    4.80
   4  12  11   27.90    6.40
   0 -13 -11   47.70    9.70
   0 -13  11   46.40    6.60
  -1 -13 -11   80.49   12.60
   1 -13  11   94.09    9.60
  -1 -13  11   87.69    9.40
   1 -13 -11   83.29   12.60
   2 -13  11    8.60    3.50
   2 -13 -11    6.20    6.90
  -2 -13  11   12.90    5.00
   2  13  11   10.10    4.20
  -2 -13  11    8.80    3.00
  -3 -13 -11  103.19   10.20
   3  13  11  102.99   11.70
   0 -14 -11   50.49    9.80
   0 -14  11   53.29    6.60
   1 -14  11    0.40    2.60
  -1 -14 -11    3.60    6.10
   1 -14 -11   -0.20    5.50
  -1 -14  11    6.50    4.70
  -1 -14  11    2.60    2.50
   0   0  12  122.99   11.10
   0   0 -12  144.59   13.20
  -1   0 -12 1989.10  167.18
  -1   0  12 2088.29  166.58
   1   0 -12 2174.08  167.38
  -2   0  12   43.30    5.00
  -2   0 -12   36.30    5.80
   2   0 -12   37.10    5.80
  -2   0  12   37.40    4.00
  -3   0  12  188.38   15.80
  -3   0  12  211.38   16.50
   3   0 -12  188.18   17.70
  -3   0 -12  179.38   17.80
  -3   0 -12  189.18   18.90
   4   0 -12  156.28   16.20
  -4   0 -12  166.88   17.50
  -4   0  12  186.38   14.80
  -4   0 -12  164.38   16.30
  -5   0 -12  796.52   64.39
  -6   0  12  610.64   50.59
  -7   0 -12   23.60   12.00
   0  -1 -12  212.68   18.70
   0   1  12  183.18   16.80
   0   1 -12  242.48   18.70
   0  -1  12  198.48   17.10
   1   1 -12  381.56   28.60
  -1   1  12  325.47   26.60
   1   1 -12  276.27   28.00
  -1  -1 -12  308.67   28.10
  -1   1  12  339.87   26.90
  -1  -1  12  347.97   27.20
  -1   1 -12  333.37   27.90
  -2  -1 -12  806.32   68.59
   2   1 -12  815.22   68.99
  -2   1  12  840.62   67.39
  -2   1  12  887.61   67.69
  -2   1 -12  808.72   68.29
  -2  -1  12  877.41   67.89
   3   1 -12  737.13   57.89
  -3  -1 -12  671.23   58.49
  -3   1  12  783.82   56.29
  -3   1  12  724.23   55.79
  -3  -1 -12  691.83   57.49
  -3  -1  12  780.62   56.49
  -3   1 -12  622.24   58.49
  -3  -1  12  668.13   55.79
   3  -1 -12  627.54   57.29
  -3   1 -12  629.84   56.89
   4   1 -12  438.06   37.40
  -4  -1 -12  408.86   36.90
  -4  -1 -12  419.06   38.00
  -4   1  12  462.15   35.40
  -4  -1  12  452.25   35.70
  -4   1 -12  393.26   37.90
  -5  -1 -12  892.41   81.49
  -5  -1  12 1170.98   83.59
  -5   1 -12  982.30   81.29
  -6   1  12 1189.08   90.09
  -6   1 -12 1069.49   89.29
  -6  -1  12 1071.19   90.39
  -7  -1 -12   47.30   14.30
  -7   1 -12   60.69   16.50
   0   2  12   35.60    3.60
   0  -2 -12   34.50    6.10
   0   2  12   38.40    4.00
   0  -2  12   32.20    4.80
   0   2 -12   51.39    6.60
  -1  -2 -12  829.42   69.69
   1   2 -12  754.22   69.89
  -1   2  12  851.71   68.39
  -1   2  12  869.61   68.59
   1   2  12  843.52   68.29
  -1   2 -12  970.60   69.69
  -1  -2  12  863.71   68.99
   2   2 -12  145.09   14.20
  -2   2  12  141.79   12.30
  -2  -2 -12  148.39   15.10
  -2   2  12  153.58   12.70
  -2  -2  12  143.89   13.30
  -2   2 -12  151.78   14.00
  -3  -2 -12 1529.15  115.99
  -3  -2 -12 1363.16  116.69
  -3   2  12 1368.66  113.99
   3   2 -12 1490.05  116.29
  -3   2  12 1585.24  114.39
  -3  -2  12 1504.25  114.89
  -3   2 -12 1268.67  116.89
  -3   2 -12 1298.97  114.89
   4   2 -12  207.88   20.50
  -4  -2 -12  219.18   21.40
  -4  -2 -12  211.58   21.10
  -4   2  12  238.88   18.40
  -4  -2  12  227.78   19.10
  -4   2 -12  196.88   21.30
   5   2 -12  132.89   15.60
  -5  -2 -12  154.18   16.10
  -5   2  12  119.39   11.70
  -5  -2  12  132.59   12.70
  -5   2 -12  178.38   29.50
  -5   2 -12  157.38   13.30
  -6   2  12   70.89    7.30
  -6  -2  12   62.39    8.20
  -6   2 -12   62.69    6.40
  -6   2 -12   62.69   20.90
  -7   2  12   32.50    5.20
  -7  -2 -12   32.90   12.30
  -7   2 -12   32.40   13.40
   0  -3 -12 3055.19  235.38
   0   3 -12 2527.05  235.48
   0   3  12 3190.38  233.98
   0   3  12 2969.40  234.18
  -1   3  12 3065.39  246.08
   1   3 -12 2818.72  247.68
  -1  -3 -12 3178.68  247.48
  -1   3  12 3284.67  246.28
   1   3  12 3076.69  245.98
  -1  -3  12 3091.69  246.78
  -2   3  12  420.16   34.90
  -2  -3 -12  419.76   37.00
   2   3 -12  415.86   36.80
  -2   3  12  450.85   35.20
  -2   3 -12  469.55   36.30
  -2  -3  12  414.26   35.80
   3   3 -12  119.79   12.70
   3   3 -12  110.89   16.60
  -3  -3 -12  106.59   13.40
  -3  -3 -12  125.69   14.10
  -3   3  12  120.59   10.30
  -3   3  12  132.19   10.80
  -3   3 -12  136.79   10.30
  -3   3 -12  139.09   22.90
  -3   3 -12  103.09   14.50
  -3  -3  12  118.09   11.80
  -3   3 -12  102.39   11.80
  -4   3  12   33.80    4.10
   4   3 -12   31.20    6.30
  -4  -3 -12   34.10    7.30
  -4  -3 -12   41.40    8.30
  -4   3 -12   27.50    7.10
  -4   3 -12   34.90   15.50
  -4  -3  12   35.40    5.40
  -5   3  12  397.56   36.10
  -5  -3 -12  480.45   38.60
  -5  -3 -12  443.56   39.60
  -5   3 -12  514.15   53.09
  -5  -3  12  420.96   36.70
  -6  -3 -12  397.26   36.60
  -6  -3 -12  436.16   37.00
  -6   3 -12  426.16   49.60
  -7   3  12   68.29    7.60
  -7  -3 -12   63.39   14.20
  -7   3 -12   71.19   18.20
   0   4  12  706.73   54.49
   0   4  12  650.63   54.69
   1   4 -12  244.78   23.10
  -1   4  12  269.37   21.30
  -1  -4 -12  242.78   23.50
  -1   4  12  258.27   21.00
   1   4  12  266.97   20.90
  -1  -4  12  247.38   22.10
   2   4 -12  442.76   39.70
  -2   4  12  459.85   37.60
  -2  -4 -12  454.55   40.00
  -2   4  12  457.25   37.90
  -2   4 -12  543.15   39.40
  -2   4 -12  446.26   46.60
  -2  -4  12  459.55   38.80
  -3  -4 -12   28.10    6.60
  -3   4  12   25.10    3.40
  -3  -4 -12   30.50    7.70
  -3   4  12   28.50    3.90
   3   4 -12   26.00    5.80
   3   4 -12   37.90   10.80
  -3  -4  12   37.50    5.60
  -3   4 -12   37.00    5.50
  -3   4 -12   42.80   14.80
  -3   4 -12   28.60    7.80
  -3   4 -12   33.90    3.40
   4   4 -12  123.69   13.90
  -4  -4 -12  133.49   15.90
  -4   4  12  132.49   11.20
  -4  -4 -12  126.79   14.90
  -4   4 -12  137.69   25.60
  -4   4 -12  114.69   14.80
  -4  -4  12  134.59   12.90
  -5  -4 -12  158.88   17.70
  -5  -4 -12  164.78   16.30
  -5  -4 -12  176.48   17.20
  -5   4 -12  129.69   27.70
  -5  -4  12  147.89   14.90
  -6  -4 -12   52.59    8.90
  -6  -4 -12   48.00    8.80
  -6   4 -12   53.39   19.10
  -7   4  12    7.80    3.60
  -7  -4 -12   14.00   13.60
  -7  -4  12   11.00    2.30
   0   5  12 1838.62  148.69
   0   5 -12 1778.02  148.99
   0   5  12 1954.00  148.39
  -1   5  12  126.99   10.50
   1   5 -12  122.79   22.40
   1   5 -12  100.79   12.40
   1   5 -12  111.09   11.40
  -1  -5 -12  114.19   14.20
  -1   5  12  125.19   10.20
  -1   5 -12  114.99   11.10
   1   5  12  129.49   10.00
  -1  -5  12  117.09   12.10
  -2  -5 -12  211.18   20.50
   2   5 -12  189.68   19.50
  -2  -5 -12  200.98   20.60
  -2   5  12  213.38   17.50
  -2   5  12  214.88   17.20
   2   5 -12  183.88   23.10
  -2  -5  12  225.08   17.60
   2   5  12  229.88   21.20
  -2   5 -12  207.68   28.80
  -2   5 -12  168.68   21.80
  -2  -5  12  207.18   18.90
  -3   5  12  205.18   17.30
  -3   5  12  208.78   17.50
   3   5 -12  201.08   20.10
  -3  -5 -12  185.38   22.70
   3   5 -12  195.88   24.90
  -3  -5 -12  232.38   21.60
  -3   5 -12  216.38   18.90
   3   5  12  236.18   22.10
  -3   5 -12  198.58   22.00
  -3   5 -12  222.98   31.50
  -3  -5  12  198.98   19.10
   4   5 -12  197.58   26.40
  -4  -5 -12  220.28   22.30
   4   5 -12  201.98   21.20
  -4  -5 -12  252.07   21.10
  -4  -5 -12  209.18   22.30
  -4   5  12  210.38   18.20
  -4   5 -12  213.78   21.90
  -4  -5  12  213.88   20.00
  -4   5 -12  238.38   35.80
  -5  -5 -12  154.98   17.20
  -5  -5 -12  157.18   15.80
  -5  -5 -12  141.09   17.20
  -5   5 -12  128.89   28.90
  -5  -5  12  152.18   14.70
  -6  -5 -12   38.30    7.20
  -6  -5 -12   37.90    8.10
  -6  -5  12   43.20    6.30
  -7  -5  12   96.19    8.90
   0  -6 -12  528.05   43.70
   0   6 -12  476.75   41.90
   0   6 -12  400.26   44.40
   0   6  12  534.95   43.30
   0   6  12  540.85   41.60
   0  -6  12  532.85   41.60
   0   6  12  522.65   41.10
   1   6 -12   37.40   10.30
   1   6 -12   29.40    6.40
  -1   6  12   40.70    4.60
  -1   6  12   45.40    6.20
  -1   6  12   35.40    3.80
  -1  -6 -12   36.80    7.10
  -1  -6 -12   26.20    7.80
   1   6 -12   22.00    4.70
  -1   6 -12   28.20    4.90
   1  -6 -12   43.60    7.50
   1   6  12   41.60    3.70
   1   6  12   30.40    6.90
  -1  -6  12   35.60    4.40
   2   6 -12  997.00   89.19
  -2  -6 -12 1116.09   89.09
   2   6 -12  928.31   91.09
  -2  -6 -12  991.60   89.09
  -2   6  12 1200.88   87.29
  -2   6  12 1136.39   86.89
  -2   6 -12  931.61   90.99
   2   6  12 1134.59   89.79
  -2  -6  12 1238.88   87.29
  -3   6  12   38.80    4.80
  -3   6  12   37.00    4.40
   3   6 -12   40.30    7.60
   3   6 -12   35.30   12.30
  -3  -6 -12   55.59    9.60
  -3   6 -12   49.30    7.20
  -3   6 -12   55.79   18.60
  -3   6 -12   35.40    9.20
  -3  -6  12   33.00    6.60
   3   6  12   46.20    9.30
  -4  -6 -12   19.60    6.80
   4   6 -12   12.80   11.20
  -4  -6 -12   25.40    5.30
  -4   6  12   16.50    3.00
  -4  -6 -12   21.90    8.20
  -4   6 -12   21.00    2.90
  -4  -6  12   23.80    6.00
  -4   6 -12   20.60   16.40
  -4   6 -12   23.80    7.20
  -5  -6 -12  114.19   16.50
  -5  -6 -12  145.49   15.10
  -5  -6 -12  137.29   16.80
   5   6 -12  120.99   20.60
  -5  -6  12  140.09   14.50
  -5  -6  12  179.68   15.30
  -6  -6 -12  139.69   14.70
  -6  -6 -12  123.29   16.20
  -6  -6  12  161.88   14.20
   0   7 -12 1217.68  106.89
   0   7 -12 1101.59  108.89
   0   7  12 1287.27  106.09
   0  -7 -12 1466.75  108.89
   0   7  12 1355.96  106.59
   0   7  12 1483.35  108.29
   0  -7  12 1357.36  106.59
  -1   7  12  144.29   12.70
  -1   7  12  125.49   11.40
  -1  -7 -12  133.09   14.60
   1   7 -12  115.79   12.30
  -1  -7 -12  121.09   15.40
   1   7 -12  104.39   13.50
   1  -7  12  118.49   11.30
   1   7 -12  136.39   18.50
  -1   7  12  125.59   10.90
   1   7  12  123.49   10.70
   1  -7 -12  146.59   14.90
  -1   7 -12  111.69   11.90
  -1  -7  12  128.69   11.30
   1   7  12  144.79   14.80
  -2  -7 -12   46.30   10.10
   2   7 -12   50.19   12.80
  -2  -7 -12   60.49    9.70
   2   7 -12   45.50    8.60
  -2   7  12   61.89    5.80
  -2   7  12   56.89    6.20
  -2  -7  12   52.19    8.40
  -2  -7  12   63.09    6.30
   2   7  12   49.00    9.50
  -2   7 -12   47.90   11.20
   3   7 -12  794.92   78.59
  -3   7  12  951.20   72.99
  -3   7  12  887.51   72.69
  -3  -7 -12  872.71   75.79
   3   7 -12  802.92   75.59
  -3  -7  12  846.82   74.49
  -3   7 -12  919.11   77.49
  -3   7 -12  998.30   74.29
  -3  -7  12  942.71   73.19
   3   7  12  983.60   76.49
  -4   7  12  270.57   23.60
   4   7 -12  237.28   31.60
  -4  -7 -12  248.08   27.70
  -4  -7 -12  325.87   25.80
   4   7  12  301.47   28.50
  -4   7 -12  325.37   27.50
  -4  -7  12  241.28   25.50
   5   7 -12  100.59   18.20
  -5  -7 -12  121.09   12.60
  -5  -7 -12  103.29   14.90
   6   7 -12   35.90   11.20
  -6  -7 -12   39.30    6.60
  -6  -7 -12   31.80    7.90
  -6  -7  12   39.10    5.90
   0  -8 -12   17.40    6.10
   0   8 -12   32.10    9.10
   0   8 -12   14.70    4.10
   0   8  12   20.10    5.50
   0  -8  12   17.80    3.30
   0   8  12   17.80    2.90
   0   8  12   24.70    4.10
   1  -8  12  762.82   61.79
  -1   8  12  827.42   61.99
  -1  -8 -12  601.34   64.79
  -1  -8 -12  830.42   64.39
   1   8 -12  672.23   66.19
   1   8 -12  702.03   62.39
  -1   8  12  810.82   61.49
  -1   8 -12  682.83   62.09
   1  -8 -12  816.82   64.49
   1   8  12  840.52   64.29
   1   8  12  721.53   61.19
  -1  -8  12  808.22   61.89
   2   8 -12  190.68   22.70
  -2   8  12  252.87   20.40
  -2  -8 -12  220.38   24.10
   2   8 -12  213.78   27.20
  -2  -8 -12  224.98   23.10
  -2   8  12  233.98   19.90
  -2   8 -12  242.18   26.70
  -2  -8  12  224.78   23.80
  -2  -8  12  265.77   20.50
   2  -8 -12  247.88   23.90
   2   8  12  261.87   24.20
  -3   8  12   79.79    8.40
   3   8 -12   75.19   16.60
  -3  -8 -12   79.09   12.60
  -3  -8  12   86.99   11.90
   3   8  12   81.89   12.80
  -3   8 -12   96.99   11.40
  -3   8 -12   90.99   15.40
  -4  -8 -12   57.19    8.10
  -4   8  12   61.49    6.20
  -4  -8 -12   37.80   10.20
   4   8 -12   44.50   14.50
  -4   8 -12   57.79    9.80
  -4  -8  12   49.70    8.80
   4   8  12   63.89   11.50
  -5  -8 -12  224.68   19.90
   5   8 -12  190.08   25.70
   5   8  12  202.58   21.90
   6   8 -12   45.30   10.80
  -6  -8 -12   36.90    6.60
  -6  -8 -12   38.90    8.20
  -6   8 -12   46.80    4.10
  -6  -8  12   38.30    6.10
   0  -9  12  468.65   40.00
   0   9  12  513.35   40.40
   0   9  12  505.45   41.70
   0   9 -12  424.66   40.60
   0   9  12  471.55   39.50
   0  -9 -12  533.95   43.20
  -1  -9 -12   23.80    7.30
  -1   9  12   19.20    3.30
  -1   9  12   19.80    3.80
   1  -9  12   19.00    3.50
   1   9 -12   16.70    5.00
   1   9 -12   22.70   10.60
   1  -9 -12   24.80    7.30
   1   9  12   22.60    6.80
  -1   9 -12   17.70    4.80
  -1  -9  12   21.20    4.00
  -2   9  12  199.78   18.00
  -2  -9 -12  195.38   21.10
  -2  -9 -12  166.58   21.80
   2   9 -12  176.68   25.70
   2   9  12  230.08   22.00
  -2   9 -12  209.98   25.00
  -2  -9  12  211.28   18.10
   2  -9 -12  215.88   22.30
  -3  -9 -12  177.88   22.80
  -3   9  12  237.38   19.00
   3   9 -12  209.48   27.70
  -3  -9  12  205.08   21.90
  -3   9 -12  215.78   21.10
   3   9  12  242.68   23.70
  -3  -9  12  205.18   20.50
   4   9 -12  218.48   29.00
  -4  -9 -12  246.18   22.00
   4   9  12  245.18   24.80
   5   9 -12   31.50   11.20
  -5  -9 -12   37.60    6.20
  -5  -9 -12   30.50    8.30
   5   9  12   34.20    8.00
  -5   9 -12   33.90    3.80
   0  10  12   28.00    5.90
   0 -10 -12   19.30    7.30
   0  10  12   17.90    4.50
   0  10 -12   19.80    5.60
   0 -10  12   18.10    3.80
  -1  10  12  217.58   18.40
  -1 -10 -12  205.48   21.70
   1 -10  12  194.08   17.90
   1  10 -12  195.98   23.90
   1  10  12  208.58   20.60
  -1  10 -12  164.78   18.70
  -1 -10  12  223.78   18.30
   1 -10 -12  209.98   22.10
   2  10 -12   21.40   11.60
  -2  10  12   14.50    4.00
  -2 -10 -12   20.00    7.70
  -2  10 -12   25.00   10.40
   2  10  12   26.60    7.80
   2 -10 -12   22.60    8.30
  -2 -10  12   19.40    4.10
   3  10 -12  274.87   32.30
   3  10  12  291.37   28.00
   4  10 -12   58.09   14.20
  -4 -10 -12   67.39    8.50
   4  10  12   62.19   10.60
   5  10 -12   49.00   11.40
  -5 -10 -12   46.50    6.90
   5  10  12   50.59    8.40
   0  11  12   50.09    7.00
   0 -11  12   50.19    6.60
   0 -11 -12   45.50    9.90
   0  11 -12   43.30    7.80
  -1 -11 -12   28.20    8.30
  -1  11  12   21.00    4.60
   1  11 -12   15.20    6.90
   1 -11  12   24.10    4.60
   1  11  12   22.20    6.50
   1 -11 -12   27.90    8.40
  -1 -11  12   25.70    4.70
  -1  11 -12   19.40    5.30
   2  11 -12   63.79   13.60
  -2 -11 -12   74.09   11.50
  -2 -11  12   69.49    8.10
   2 -11 -12   74.19   12.40
   2  11  12   66.69   10.90
  -2  11 -12   78.69   15.20
   3  11 -12   45.60   12.70
   3  11  12   31.40    8.00
  -3  11 -12   60.39   11.60
   4  11 -12   -1.00    8.10
  -4 -11 -12   11.40    3.90
   4  11  12   10.20    6.10
   0 -12  12  181.58   16.30
   0 -12 -12  167.58   19.40
  -1 -12 -12   69.49   11.50
   1 -12  12   65.39    8.10
  -1 -12  12   73.69    8.10
   1 -12 -12   74.99   12.40
   1  12  12   58.69   11.30
   2  12 -12   43.80   10.20
   2 -12  12   36.70    5.60
  -2 -12  12   30.70    5.00
  -2  12 -12   45.40   11.90
   2 -12 -12   34.60    9.40
   2  12  12   23.60    6.40
   3  12 -12    7.20    8.00
   3  12  12    4.80    4.90
   3 -12 -12   10.90    8.40
   4  12 -12   61.19   10.90
   4  12  12   52.29    8.20
   0 -13 -12   57.39   10.40
   0 -13  12   51.19    6.80
   1 -13  12  101.49   10.20
  -1 -13 -12   98.09   13.90
   1 -13 -12   98.69   14.30
  -1 -13  12   97.79   10.10
   2 -13  12   45.70    6.20
   2  13  12   33.50    6.20
  -2 -13  12   39.00    5.50
   2 -13 -12   39.10    9.50
  -2 -13  12   54.59    7.50
   0 -14 -12    4.90    5.40
   0 -14  12    1.80    2.70
   1 -14  12   12.10    3.30
   1 -14 -12   11.80    6.10
  -1 -14  12    9.50    3.00
  -1 -14  12   13.80    5.20
   0   0 -13    0.40    3.60
   0   0  13    0.90    1.50
  -1   0 -13    1.20    3.70
  -1   0  13    4.10    2.00
   1   0 -13    1.10    4.10
   1   0 -13    0.90    2.60
   2   0 -13 1037.30   93.29
  -2   0 -13 1092.29   92.89
  -2   0  13 1194.98   91.89
  -2   0  13 1261.87   92.29
  -3   0  13  174.78   14.00
  -3   0 -13  155.68   16.80
  -3   0  13  156.38   13.20
   3   0 -13  151.48   15.20
  -3   0 -13  149.88   15.50
  -4   0 -13  346.67   31.10
   4   0 -13  351.06   31.70
  -4   0 -13  386.86   33.20
  -5   0 -13  307.97   25.70
  -6   0  13   61.99    7.70
  -6   0 -13   39.40   15.70
  -7   0 -13    7.20   10.50
   0  -1 -13   33.80    5.90
   0  -1  13   19.70    3.20
   0   1  13   28.50    3.40
   0   1 -13   40.60    6.20
  -1   1  13 1024.80   83.09
  -1   1  13 1029.10   82.79
   1   1 -13 1158.08   84.39
  -1  -1 -13  963.40   83.99
  -1   1 -13  966.10   83.79
  -1  -1  13 1066.69   83.29
   2   1 -13  852.11   74.49
  -2   1  13  944.81   72.79
  -2   1  13  959.20   73.19
  -2  -1 -13  815.32   73.99
  -2   1 -13  866.81   73.89
  -2  -1  13  960.60   73.39
   2   1  13  946.31   73.09
  -3  -1 -13  537.35   47.30
  -3   1  13  655.73   46.10
   3   1 -13  550.04   47.60
  -3   1  13  580.54   45.60
  -3  -1 -13  555.04   48.70
  -3  -1  13  538.65   45.60
  -3  -1  13  635.74   46.30
  -3   1 -13  546.75   46.90
  -3   1 -13  537.55   48.90
   3  -1 -13  511.15   47.20
  -4  -1 -13  161.48   17.30
   4   1 -13  154.58   16.00
  -4  -1 -13  149.49   16.60
  -4   1  13  166.58   13.90
  -4  -1  13  164.38   14.30
  -4   1 -13  151.38   15.20
  -4   1 -13  162.28   17.50
  -5   1 -13  277.07   24.80
  -5  -1  13  331.47   27.30
  -6   1  13  527.05   40.30
  -6   1 -13  448.16   39.20
  -6  -1  13  466.65   40.50
  -7  -1 -13   17.20   11.10
  -7   1 -13   22.30   12.70
   0   2  13  691.43   57.79
   0   2  13  742.83   57.59
   0  -2 -13  719.73   59.19
  -1   2  13   45.90    4.80
  -1   2  13   46.10    4.30
  -1  -2 -13   37.80    6.80
   1   2 -13   36.00    6.60
   1   2 -13   69.29    8.20
  -1  -2  13   48.10    5.80
  -1   2 -13   49.60    6.80
   1   2  13   40.30    4.10
  -2   2  13   93.89    8.80
   2   2 -13   95.89   10.60
  -2   2  13   97.29    8.40
  -2  -2 -13  100.89   11.70
  -2  -2  13   99.19    9.60
  -2   2 -13   95.49   10.30
  -3  -2 -13  300.87   25.60
  -3  -2 -13  282.27   26.30
  -3   2  13  308.57   23.40
   3   2 -13  275.67   25.20
  -3   2  13  289.77   23.00
   3   2 -13  239.78   28.60
  -3   2 -13  256.97   26.80
  -3   2 -13  254.47   24.30
  -3  -2  13  295.67   24.00
  -4  -2 -13   74.79   10.40
  -4  -2 -13   69.29   10.50
  -4   2  13   71.99    6.90
   4   2 -13   61.99    9.10
  -4  -2  13   71.99    7.90
  -4   2 -13   66.59   11.20
  -5  -2 -13   26.70    7.40
  -5   2  13   27.00    3.60
  -5  -2  13   25.30    4.70
  -5   2 -13   38.20    3.90
  -5   2 -13   31.50   16.80
  -6   2  13  150.48   12.70
  -6   2 -13  128.19   11.70
  -6  -2  13  123.69   13.30
  -7  -2 -13  103.09   19.10
  -7   2 -13  100.89   20.60
   0  -3 -13  164.78   17.50
   0   3  13  181.68   14.80
   0   3  13  183.28   15.10
  -1   3  13  527.05   40.80
   1   3 -13  430.76   42.30
  -1  -3 -13  502.05   42.50
  -1   3  13  511.65   40.50
  -1   3 -13  586.34   42.30
   1   3  13  484.75   40.40
  -1  -3  13  491.65   41.30
   2   3 -13  344.27   32.60
  -2  -3 -13  370.86   32.80
  -2   3  13  391.16   30.90
  -2   3  13  384.96   30.60
  -2  -3  13  366.36   31.50
  -2   3 -13  394.86   32.10
  -2   3 -13  391.26   39.20
  -3  -3 -13   45.20    8.10
  -3  -3 -13   38.10    8.00
   3   3 -13   57.09   12.00
  -3   3  13   46.40    4.70
  -3   3  13   46.50    5.20
   3   3 -13   46.50    7.30
  -3  -3  13   53.39    6.60
  -3   3 -13   51.19    9.70
  -3   3 -13   52.99   15.60
  -3   3 -13   54.29    5.20
  -3   3 -13   30.90    6.00
  -4  -3 -13  308.67   29.50
  -4  -3 -13  313.37   29.10
  -4   3  13  327.97   26.00
   4   3 -13  293.67   28.50
  -4   3 -13  281.77   29.30
  -4   3 -13  349.07   40.00
  -4  -3  13  343.47   27.00
  -5   3  13  303.17   25.70
  -5  -3 -13  324.87   30.10
  -5   3 -13  344.37   42.90
  -5  -3  13  312.07   26.80
  -6   3  13  144.99   12.20
  -6   3 -13  134.19   11.50
  -6  -3  13  117.79   13.20
  -7  -3 -13   85.69   16.10
  -7   3 -13   90.69   18.80
   0   4  13   40.90    3.80
   0   4 -13   33.30    6.80
   0   4  13   39.80    4.30
   0  -4 -13   34.80    7.20
  -1   4  13  241.28   19.30
  -1  -4 -13  211.58   21.70
   1   4 -13  207.88   21.20
  -1   4  13  246.08   19.00
  -1  -4  13  221.58   20.20
   1   4  13  244.18   18.90
  -2   4  13 1056.39   79.49
  -2   4  13 1018.60   79.19
   2   4 -13  807.92   82.89
  -2  -4 -13  932.51   81.09
   2   4 -13  893.61   81.19
  -2  -4  13  924.91   80.09
  -2  -4  13 1113.69   79.49
  -2   4 -13 1149.19   80.79
  -2   4 -13  934.91   87.69
  -3   4  13   23.20    3.10
  -3  -4 -13   14.20    5.50
  -3  -4 -13   10.60    6.30
   3   4 -13   18.50    5.20
  -3   4  13   15.90    2.40
   3   4 -13   24.30   10.10
  -3   4 -13   15.90    4.30
  -3   4 -13   13.40    6.50
  -3   4 -13   18.00   11.90
  -3  -4  13   15.60    4.30
   4   4 -13  254.97   25.10
  -4  -4 -13  270.67   26.20
   4   4 -13  202.78   29.40
  -4   4  13  278.67   22.20
  -4  -4 -13  286.57   26.00
  -4  -4  13  269.27   23.50
  -4   4 -13  257.17   25.90
  -4   4 -13  310.77   38.10
  -5  -4 -13  671.63   56.49
  -5  -4 -13  574.14   54.19
  -5   4 -13  699.63   69.09
  -5  -4  13  657.93   53.19
  -6  -4 -13   32.80    7.60
  -6   4 -13   31.00   16.90
  -6  -4  13   39.80    6.30
  -7  -4  13   23.80    3.40
   0  -5 -13 4364.76  338.37
   0   5  13 4023.50  336.17
   0   5  13 4255.27  335.87
  -1  -5 -13  449.46   44.60
  -1   5  13  521.05   42.80
  -1  -5 -13  511.85   45.00
  -1   5  13  520.15   42.40
   1   5  13  551.74   45.00
  -1  -5  13  579.74   43.00
   1  -5 -13  535.15   45.50
   1   5  13  515.55   42.30
  -2   5  13  321.87   24.90
  -2  -5 -13  301.17   27.60
  -2   5  13  314.57   24.50
   2   5 -13  255.37   30.20
   2   5 -13  270.87   26.90
  -2  -5 -13  295.17   27.40
  -2  -5  13  295.47   26.00
  -2  -5  13  340.37   24.90
  -2   5 -13  287.77   36.30
   2  -5 -13  269.17   27.50
   2   5  13  326.97   28.10
  -2   5 -13  252.07   29.30
  -3   5  13    6.00    2.00
   3   5 -13    2.70    9.20
  -3  -5 -13    8.50    6.60
  -3   5  13    7.40    2.00
   3   5 -13    7.90    4.20
  -3  -5  13    5.70    4.10
   3   5  13    8.00    6.40
  -3   5 -13   12.70   12.60
  -3   5 -13   11.60    6.80
  -3   5 -13    9.40    4.00
   4   5 -13  522.85   53.79
  -4  -5 -13  566.04   51.09
  -4  -5 -13  584.44   50.49
   4   5 -13  554.44   50.29
  -4   5  13  616.14   47.20
  -4   5 -13  599.14   50.69
  -4   5 -13  619.54   63.59
  -4  -5  13  578.24   48.50
  -5  -5 -13  141.99   16.40
  -5  -5 -13  127.69   15.70
   5   5 -13  114.69   24.00
  -5  -5  13  123.59   13.00
  -5   5 -13  137.39   29.50
  -6  -5 -13    3.00    4.90
  -6   5 -13    8.60    1.70
  -6  -5  13    5.50    3.20
   0   6  13 1205.08   99.39
   0   6 -13 1046.50   99.99
   0  -6  13 1307.17   99.89
   0   6  13 1387.56  101.59
   0   6  13 1270.87   99.79
   0  -6 -13 1233.08  101.79
   1   6 -13  202.28   20.70
  -1   6  13  229.18   19.70
  -1   6  13  248.18   20.20
  -1  -6 -13  231.98   22.80
  -1  -6 -13  190.78   22.80
   1   6 -13  182.28   25.50
   1  -6  13  256.07   20.40
  -1   6  13  276.47   21.40
   1   6  13  236.58   19.60
  -1  -6  13  257.77   20.20
   1   6  13  245.88   22.60
   1  -6 -13  245.38   23.00
   2   6 -13   63.79   10.30
  -2  -6 -13   83.79   11.90
  -2  -6 -13   67.49   11.50
  -2   6  13   88.09    7.80
  -2   6  13   96.49    8.30
   2   6 -13   75.89   14.40
  -2  -6  13   80.89   10.50
  -2   6 -13   68.19   13.30
  -2  -6  13   97.89    8.30
   2  -6 -13   89.69   12.50
   2   6  13   97.49   12.70
  -3   6  13   40.00    4.60
   3   6 -13   43.80    8.00
   3   6 -13   33.80   12.30
  -3   6  13   39.00    4.90
  -3  -6 -13   35.90    9.10
   3   6  13   52.09    9.70
  -3   6 -13   39.90    6.90
  -3   6 -13   34.00    9.60
  -3   6 -13   42.70   17.90
  -3  -6  13   38.50    6.90
  -4  -6 -13  132.89   16.70
  -4  -6 -13  108.39   15.70
   4   6 -13  123.89   20.00
  -4   6  13  126.09   11.40
  -4   6 -13  122.49   29.20
  -4  -6  13  109.49   13.50
  -4   6 -13  128.19   16.00
  -4   6 -13  147.69   11.30
   5   6 -13   90.69   17.30
  -5  -6 -13   76.69   13.20
  -5  -6 -13   90.79   13.40
  -5  -6 -13   91.09   11.50
  -5  -6  13   89.09   10.60
  -5  -6  13  108.59   11.30
  -6  -6 -13  176.28   21.00
  -6  -6  13  230.88   19.10
   0   7  13   31.40    3.80
   0   7 -13   25.80    5.10
   0  -7  13   38.00    4.60
   0   7  13   37.80    4.90
   0  -7 -13   34.10    7.40
   0   7  13   34.40    6.70
   0   7 -13   30.40    9.60
  -1   7  13  232.98   21.50
  -1   7  13  223.28   17.50
  -1  -7 -13  211.38   20.60
  -1  -7 -13  176.18   20.70
   1  -7  13  209.58   17.40
  -1   7  13  201.68   16.90
   1   7 -13  176.28   18.20
   1   7 -13  168.38   23.10
   1  -7 -13  217.58   20.50
  -1  -7  13  209.38   17.40
  -1   7 -13  169.68   17.80
   1   7  13  190.98   16.70
   1   7  13  208.08   20.10
  -2  -7 -13  223.68   25.60
   2   7 -13  216.58   24.70
  -2  -7 -13  268.47   25.30
   2   7 -13  236.08   29.00
  -2   7  13  285.37   22.10
  -2   7  13  299.27   22.60
   2  -7 -13  253.17   25.40
  -2  -7  13  284.87   22.50
   2   7  13  295.07   26.10
  -2   7 -13  242.78   28.20
  -2  -7  13  268.77   24.40
  -3   7  13  232.78   20.50
   3   7 -13  200.28   23.40
   3   7 -13  211.98   29.40
  -3  -7 -13  230.88   24.70
  -3   7  13  279.27   21.00
  -3   7 -13  254.57   26.60
   3   7  13  268.77   25.20
  -3  -7  13  270.57   21.10
  -3  -7  13  231.68   23.00
  -3   7 -13  239.18   22.50
   4   7 -13   84.19   18.40
  -4  -7 -13  127.89   16.80
  -4   7  13  129.19   11.20
  -4   7 -13  140.49   16.10
   4   7  13  137.19   16.90
  -4  -7  13  105.89   13.50
  -5  -7 -13   97.89   14.70
  -5  -7 -13  117.79   12.30
   5   7 -13   95.99   17.50
  -6  -7 -13   30.20    7.50
   6   7 -13   34.30   10.50
  -6  -7  13   31.20    5.40
   0   8  13    6.50    2.00
   0   8  13    7.00    4.50
   0  -8  13    9.40    2.50
   0   8 -13    2.00    3.60
   0  -8 -13    3.80    5.10
   0   8 -13   15.80    8.50
   0   8  13    6.30    2.70
  -1   8  13   86.69    7.50
   1  -8  13   79.49    7.80
   1   8 -13   81.19   14.60
   1   8 -13   56.89    8.80
  -1  -8 -13   70.29   16.70
   1   8 -13   61.79   10.90
  -1  -8 -13   86.69   12.30
  -1   8  13   74.49    8.00
  -1   8 -13   62.79    8.90
   1   8  13   84.89   11.70
   1  -8 -13   84.69   12.00
  -1  -8  13   84.69    8.00
   2   8 -13   29.90   12.10
   2   8 -13   26.40    7.30
  -2  -8 -13   31.40    9.70
  -2   8  13   30.70    4.20
  -2   8  13   34.50    4.90
  -2  -8 -13   33.50    7.90
  -2   8 -13   38.60   11.50
   2   8  13   34.30    8.20
  -2  -8  13   35.00    5.00
   2  -8 -13   41.80    8.90
   3   8 -13  570.44   55.59
  -3   8  13  606.74   48.20
   3   8  13  612.54   51.69
  -3   8 -13  632.84   53.59
  -3   8 -13  562.14   49.40
  -3  -8  13  533.55   49.90
   4   8 -13   93.89   18.40
  -4  -8 -13   82.39   12.90
  -4  -8 -13   88.49   10.10
  -4   8  13   66.59    7.80
  -4  -8  13   76.49   10.80
   4   8  13   83.29   12.50
  -4   8 -13  100.49   13.00
  -5  -8 -13  111.19   16.10
   5   8 -13  119.29   19.10
  -5  -8 -13  129.29   13.30
   5   8  13  146.29   15.60
  -6  -8 -13  128.39   14.90
   0  -9  13    3.20    2.30
   0   9 -13   -0.90    3.70
   0  -9 -13    5.60    5.90
   0   9  13    2.80    2.60
   0   9  13    1.10    4.10
   0   9  13   -1.20    1.90
   1   9 -13 1440.96  129.99
  -1   9  13 1564.04  126.29
  -1  -9 -13 1588.04  128.69
   1  -9  13 1519.45  125.99
   1   9  13 1626.44  128.19
   1  -9 -13 1585.44  128.79
  -1  -9  13 1626.84  126.19
   2   9 -13   75.49   16.00
  -2  -9 -13   80.89   11.80
  -2   9  13   72.69    8.00
  -2  -9 -13   67.09   12.50
  -2  -9  13   66.49    7.90
  -2   9 -13   77.19   15.20
   2  -9 -13   72.59   12.30
   2   9  13   81.59   12.00
  -3   9  13   17.10    3.60
  -3  -9 -13    8.30    8.20
   3   9 -13   25.50   12.90
   3   9  13   22.00    7.90
  -3   9 -13   11.80    6.00
  -3  -9  13   12.90    7.00
  -3   9 -13   21.30    9.40
   4   9 -13    1.70   10.80
  -4  -9 -13   10.70    4.30
   4   9  13   11.40    6.80
  -4   9 -13   20.80    6.40
   5   9 -13   11.20    9.60
  -5  -9 -13   12.20    7.00
  -5   9 -13   22.40    2.90
   5   9  13   16.60    6.50
   0 -10 -13   12.30    6.70
   0  10  13   10.90    4.80
   0  10  13   13.20    4.20
   0 -10  13   12.30    3.40
   0  10 -13    5.10    4.60
   1  10 -13  513.65   46.80
  -1  10  13  485.25   42.20
   1 -10  13  497.95   41.90
  -1 -10 -13  506.55   44.90
   1  10  13  500.35   43.90
  -1 -10  13  523.45   42.10
   1 -10 -13  518.35   45.30
  -2 -10 -13  126.99   16.50
  -2  10  13  139.99   13.10
   2  10 -13  123.09   19.80
   2 -10 -13  139.09   17.70
  -2  10 -13  158.68   21.40
   2  10  13  133.69   16.40
  -2 -10  13  137.59   13.00
   3  10 -13  234.08   29.50
  -3  10 -13  297.57   28.40
   3  10  13  234.38   25.20
  -4 -10 -13   12.30    4.20
   4  10 -13   15.90   10.50
   4  10  13   28.10    7.20
   5  10 -13   35.30    9.80
   5  10  13   32.10    6.90
   0  11 -13   16.60    5.30
   0 -11 -13   26.30    8.30
   0  11  13   20.90    4.80
   0 -11  13   23.00    4.30
  -1 -11 -13  182.18   20.30
  -1  11  13  176.18   16.80
   1 -11  13  171.18   16.40
   1  11  13  180.78   18.20
  -1 -11  13  186.88   16.60
   1 -11 -13  200.58   20.90
   2  11 -13  211.88   25.60
   2 -11  13  227.08   20.30
  -2  11 -13  275.27   28.10
  -2 -11  13  225.08   19.90
   2  11  13  209.88   22.00
   2 -11 -13  217.88   24.00
   3  11 -13  291.87   31.10
   3 -11 -13  308.07   31.00
   3  11  13  271.57   26.70
   4  11 -13   34.80   10.30
  -4 -11 -13   26.30    5.10
   4  11  13   25.00    6.70
   0 -12  13  195.68   17.70
   0 -12 -13  197.78   21.30
  -1 -12 -13   80.69   13.00
   1 -12  13   86.59    9.30
  -1 -12  13   85.79    9.20
   1 -12 -13   97.49   14.30
   2 -12  13   42.90    6.00
  -2  12 -13   60.79   12.90
  -2 -12  13   36.30    5.60
   2 -12 -13   39.90    9.70
   2  12  13   33.50    6.70
   3  12 -13  175.98   19.60
  -3 -12 -13  164.28   15.30
   3 -12 -13  170.28   19.40
   3  12  13  160.08   16.70
   0 -13 -13    3.00    6.40
   0 -13  13    1.80    2.80
   1 -13  13  119.79   11.10
  -1 -13 -13  107.39   14.30
   1 -13 -13  108.89   14.80
  -1 -13  13  108.99   11.00
   2 -13  13   17.60    4.00
  -2 -13  13   10.60    5.40
  -2 -13  13   13.60    3.50
   2 -13 -13   17.50    7.20
   0 -14 -13   13.50    6.20
   0 -14  13   13.60    3.30
   1 -14 -13   15.40    6.50
   0   0 -14 2507.35  193.58
   0   0  14 2310.17  192.48
  -1   0 -14  157.48   14.90
   1   0 -14  150.68   17.30
  -1   0  14  176.18   13.20
   1   0 -14  125.39   14.30
  -2   0  14  356.06   27.10
  -2   0  14  384.56   27.60
   2   0 -14  281.47   28.60
  -2   0 -14  306.37   28.50
   3   0 -14    3.80    3.10
  -3   0  14    2.60    1.30
  -3   0 -14    3.50    4.20
  -3   0  14    1.70    2.00
  -3   0 -14    2.10    4.20
   4   0 -14  262.57   27.90
  -4   0  14  348.47   26.40
  -4   0 -14  345.17   30.10
  -4   0 -14  315.17   27.80
  -5   0  14   18.00    5.20
  -5   0  14    9.00    2.70
  -5   0 -14   12.80    2.80
  -5   0 -14    5.50    5.50
  -6   0  14   21.80    4.60
  -6   0 -14   17.00   13.00
  -7   0 -14    2.30    9.60
   0   1  14  224.48   20.10
   0  -1  14  226.08   21.60
   0  -1 -14  267.17   22.20
   0   1 -14  273.97   22.20
  -1  -1 -14  144.19   15.20
   1   1 -14  122.29   14.60
  -1   1  14  170.98   13.30
  -1   1  14  162.78   12.90
   1   1 -14  170.58   15.70
  -1  -1  14  158.38   13.50
  -1   1 -14  148.79   14.90
   2   1 -14  176.58   18.20
  -2   1  14  214.68   16.70
  -2  -1 -14  156.78   18.10
  -2   1  14  210.28   16.30
  -2   1 -14  173.28   17.80
   2   1  14  202.98   16.10
  -2  -1  14  213.48   17.00
  -3  -1 -14  357.66   32.70
  -3   1  14  372.96   29.00
   3   1 -14  304.37   34.10
  -3  -1 -14  353.26   31.10
  -3   1  14  401.76   29.50
   3   1 -14  337.47   31.20
  -3   1 -14  348.07   32.90
  -3  -1  14  348.77   29.00
   3  -1 -14  300.97   30.60
  -3  -1  14  414.36   29.80
  -3   1 -14  365.16   30.70
  -4   1  14  620.24   45.30
  -4  -1 -14  556.54   48.80
   4   1 -14  497.45   47.20
  -4  -1 -14  520.55   46.90
  -4  -1  14  597.14   45.50
  -4   1 -14  525.35   48.60
  -5   1  14  318.27   26.50
  -5  -1 -14  313.67   30.30
  -5  -1  14  332.67   26.90
  -5   1 -14  316.97   29.50
  -6   1  14  965.50   73.09
  -6   1 -14  821.12   71.99
  -6  -1  14  894.71   73.39
  -7  -1 -14   70.99   16.10
  -7   1 -14   67.49   16.60
   0   2  14 1367.46  112.29
   0   2  14 1304.67  112.49
   0  -2 -14 1368.86  113.79
   0   2 -14 1596.04  113.99
  -1  -2 -14  373.96   37.50
  -1   2  14  466.25   36.20
  -1   2  14  442.36   35.90
  -1   2 -14  471.85   37.50
   1   2  14  446.06   35.80
  -1  -2  14  448.26   36.50
   2   2 -14  280.07   26.80
  -2   2  14  319.67   24.80
  -2   2  14  328.97   25.10
  -2  -2 -14  275.87   26.80
  -2   2 -14  285.47   26.20
  -2  -2  14  316.07   25.60
   3   2 -14  240.18   29.10
  -3  -2 -14  275.67   26.10
  -3   2  14  294.87   23.60
  -3   2  14  323.47   24.10
   3   2 -14  280.07   26.10
  -3  -2 -14  287.77   27.40
  -3   2 -14  272.67   25.10
  -3  -2  14  302.87   24.60
  -3   2 -14  285.97   28.10
  -4  -2 -14   99.79   13.20
  -4  -2 -14  101.59   13.20
   4   2 -14   83.89   11.20
  -4   2  14  110.29    9.10
  -4   2 -14   77.89   10.50
  -4   2 -14  137.49   25.20
  -4   2 -14   91.79   13.60
  -4  -2  14   98.99    9.90
  -5  -2 -14  245.48   23.80
  -5   2  14  223.68   19.30
  -5  -2  14  246.78   20.10
  -5   2 -14  210.48   21.60
  -5   2 -14  249.88   35.20
  -6   2  14  118.19   10.90
  -6   2 -14  106.99    9.80
  -6  -2  14  102.09   11.50
  -7  -2 -14   40.90   13.20
  -7   2 -14   43.70   14.50
   0   3  14   73.19    6.30
   0   3  14   64.99    6.60
   0  -3 -14   67.29    9.60
   0   3 -14   84.89   10.40
  -1   3  14   48.20    5.00
  -1  -3 -14   34.70    7.30
   1   3 -14   31.60    6.90
  -1   3  14   46.80    4.40
   1   3 -14   56.79    8.10
  -1  -3  14   48.30    5.90
   1   3  14   49.60    4.30
  -1   3 -14   54.89    7.20
   2   3 -14  302.57   28.80
  -2  -3 -14  297.07   29.00
   2   3 -14  271.07   31.60
  -2   3  14  352.26   27.00
  -2   3  14  353.66   26.60
  -2   3 -14  322.17   35.50
  -2   3 -14  348.37   28.30
  -2  -3  14  342.37   27.70
  -2   3 -14  301.57   33.90
  -3  -3 -14   51.79    9.40
  -3   3  14   62.39    6.20
  -3  -3 -14   63.59   10.60
  -3   3  14   78.09    6.80
   3   3 -14   80.99   13.90
   3   3 -14   61.89    8.80
  -3   3 -14   79.19   17.60
  -3   3 -14   65.19    8.60
  -3  -3  14   67.99    8.00
  -3   3 -14   59.09   11.20
  -4  -3 -14  258.17   24.60
  -4   3  14  263.77   21.20
  -4  -3 -14  243.28   25.00
   4   3 -14  225.98   23.70
  -4   3 -14  334.77   37.30
  -4  -3  14  245.78   22.00
  -4   3 -14  252.47   25.50
  -5  -3 -14   35.10    7.50
  -5   3  14   41.70    4.50
  -5  -3 -14   43.50    9.20
  -5   3 -14   52.69   19.00
  -5  -3  14   44.80    6.10
  -6   3  14  153.68   12.80
  -6  -3  14  117.59   13.60
  -6   3 -14  139.39   11.90
  -7   3 -14   14.20   14.80
   0   4  14  294.37   24.70
   0   4  14  304.67   24.40
   1   4 -14  589.74   58.89
  -1   4  14  746.53   55.19
  -1  -4 -14  653.93   57.19
   1   4 -14  607.74   57.29
  -1   4  14  761.92   55.49
  -1  -4  14  661.53   56.09
   1   4  14  741.13   55.09
  -2   4  14  389.56   31.00
  -2  -4 -14  363.86   33.20
  -2   4  14  374.96   30.60
   2   4 -14  325.97   35.90
   2   4 -14  334.47   32.90
  -2  -4  14  372.46   31.80
   2   4  14  469.25   34.30
  -2   4 -14  443.16   32.60
  -2   4 -14  402.76   41.40
   2  -4 -14  341.17   33.80
  -2   4 -14  329.47   35.50
  -3  -4 -14  285.47   25.70
  -3   4  14  300.37   22.60
   3   4 -14  243.68   29.10
  -3   4  14  291.27   22.20
   3   4 -14  242.38   24.80
  -3  -4 -14  240.18   25.80
  -3  -4  14  281.67   23.60
  -3   4 -14  291.17   35.60
  -3   4 -14  256.17   27.20
  -3   4 -14  245.78   23.60
   4   4 -14  331.67   32.50
   4   4 -14  285.77   36.30
  -4   4  14  386.96   29.60
  -4  -4 -14  343.17   32.80
  -4  -4 -14  348.17   33.60
  -4   4 -14  439.66   46.70
  -4  -4  14  365.36   30.70
  -4   4 -14  377.06   33.90
  -5  -4 -14  325.87   33.20
  -5  -4 -14  401.56   35.70
  -5   4 -14  453.05   49.80
  -5  -4  14  374.66   32.00
  -6  -4 -14   78.19   12.80
  -6  -4  14  117.09   11.10
  -6   4 -14   92.09   23.90
  -7  -4  14   50.09    5.10
   0   5  14   11.80    2.40
   0  -5  14   15.10    2.90
   0   5  14   10.70    2.00
   0   5  14   21.30    5.10
   0  -5 -14   17.10    6.20
   0   5 -14   22.40    8.80
  -1  -5 -14  448.26   39.30
  -1   5  14  459.15   36.90
   1   5 -14  354.56   40.90
  -1  -5 -14  376.16   38.90
  -1   5  14  447.96   36.50
   1   5  14  449.66   36.40
   1   5  14  511.95   39.40
   1  -5 -14  431.56   39.50
  -1  -5  14  521.95   37.20
  -2   5  14  595.94   44.20
   2   5 -14  473.05   46.20
  -2  -5 -14  487.75   46.20
  -2   5  14  552.54   43.80
   2   5 -14  487.75   49.10
  -2  -5 -14  504.25   46.20
  -2   5 -14  499.65   49.00
   2  -5 -14  528.55   46.80
  -2  -5  14  631.04   44.30
  -2   5 -14  540.65   55.49
  -2  -5  14  506.15   45.00
   2   5  14  641.54   47.30
  -3   5  14  513.75   38.30
   3   5 -14  416.26   40.70
  -3  -5 -14  483.55   41.20
  -3   5  14  485.25   37.90
   3   5 -14  392.46   44.10
   3   5  14  566.64   42.30
  -3   5 -14  444.06   39.30
  -3  -5  14  446.76   39.30
  -3   5 -14  486.15   52.19
  -3   5 -14  422.06   42.70
   4   5 -14  308.57   34.70
  -4   5  14  353.46   26.90
  -4  -5 -14  289.27   30.30
  -4  -5 -14  306.77   31.10
  -4   5 -14  321.27   30.90
  -4   5 -14  351.06   44.40
  -4  -5  14  321.97   28.20
  -5  -5 -14  133.39   15.60
   5   5 -14  118.29   20.50
  -5  -5 -14  133.19   16.60
  -5   5 -14  150.68   31.30
  -5  -5  14  125.99   12.90
  -6  -5 -14  176.58   22.00
  -6  -5  14  260.37   20.50
   0   6  14  343.57   29.60
   0  -6  14  392.26   30.30
   0   6  14  352.56   30.10
   0   6 -14  286.07   33.80
   0   6  14  403.16   32.10
   0  -6 -14  392.26   33.10
  -1   6  14  441.76   36.80
  -1  -6 -14  355.26   39.30
  -1  -6 -14  446.86   39.80
  -1   6  14  486.15   37.30
   1  -6  14  493.55   37.50
  -1  -6  14  482.95   37.30
   1  -6 -14  440.66   39.80
   1   6  14  433.16   36.70
   1   6  14  461.55   39.50
  -2   6  14   88.19    8.40
  -2  -6 -14   77.89   12.10
  -2  -6 -14   82.49   11.90
  -2   6  14   85.69    8.00
   2   6 -14   82.39   15.40
   2   6 -14   73.29   10.90
  -2  -6  14   89.19   10.70
   2  -6 -14   81.99   12.20
  -2   6 -14   75.39   14.30
   2   6  14  101.99   12.70
  -2  -6  14   99.39    8.50
  -3  -6 -14  228.18   23.50
  -3   6  14  231.28   19.20
   3   6 -14  200.78   27.40
  -3   6  14  249.18   19.50
   3   6 -14  197.28   22.10
   3   6  14  267.67   24.10
  -3   6 -14  238.48   36.10
  -3   6 -14  232.28   25.30
  -3  -6  14  212.08   21.10
  -3   6 -14  227.18   21.10
  -4  -6 -14   59.59   10.80
  -4   6  14   51.59    5.80
   4   6 -14   55.49   14.70
  -4  -6 -14   52.49   10.50
  -4   6 -14   48.80   19.90
   4   6  14   59.19   13.50
  -4  -6  14   50.19    7.90
  -4   6 -14   59.29   10.60
  -5  -6 -14   46.80   10.60
   5   6 -14   40.50   13.80
  -5   6 -14   79.99    6.60
  -5  -6  14   64.39    8.90
  -6  -6 -14   27.20    7.80
  -6  -6  14   36.50    5.70
   0   7  14  103.19   11.40
   0   7 -14   71.59    9.70
   0   7  14   88.59    8.20
   0   7 -14   95.79   14.40
   0   7  14  100.69    9.10
   0  -7 -14   96.89   12.60
   0  -7  14   85.89    8.70
   1  -7  14  218.88   17.90
   1   7 -14  182.38   24.40
  -1   7  14  205.98   17.40
  -1   7  14  228.88   20.40
  -1  -7 -14  196.48   21.10
  -1   7  14  218.88   18.00
  -1  -7 -14  171.78   20.90
  -1  -7  14  211.98   17.80
   1   7  14  189.48   17.10
   1   7  14  211.28   20.60
   1  -7 -14  201.38   21.10
   2   7 -14  191.28   25.20
  -2  -7 -14  155.58   20.90
  -2  -7 -14  194.98   20.50
   2   7 -14  156.68   19.70
  -2   7  14  217.88   17.00
  -2   7  14  219.68   17.50
  -2  -7  14  202.98   19.40
  -2  -7  14  212.08   17.40
  -2   7 -14  198.58   24.30
   2   7  14  214.08   21.00
   2  -7 -14  202.38   21.20
   3   7 -14  121.39   19.60
  -3   7  14  113.29   10.40
   3   7 -14   87.89   13.30
  -3  -7 -14   98.19   14.60
   3   7  14  132.19   15.70
  -3   7 -14  120.09   13.10
  -3   7 -14  133.09   18.10
  -3  -7  14  112.19   13.40
  -4   7  14   89.69    8.30
   4   7 -14   75.99   17.20
  -4  -7 -14   74.09   12.50
  -4  -7  14   76.79   10.90
   4   7  14  100.29   14.00
  -4   7 -14   87.09   13.40
   5   7 -14   58.69   15.10
  -5   7 -14   91.19    8.00
  -6  -7 -14   32.10    8.10
   6   7 -14   39.40   11.00
  -6  -7  14   41.40    5.80
   0  -8 -14  105.49   13.50
   0  -8  14   98.29    9.00
   0   8  14   81.09    8.30
   0   8  14   87.09    9.20
   0   8  14   99.09   11.40
   0   8 -14   74.29   10.10
   1  -8  14   24.20    4.00
  -1   8  14   27.90    3.70
  -1  -8 -14   31.60    7.80
   1   8 -14   29.90   11.20
   1   8 -14   21.90    5.00
   1   8 -14   21.40    7.50
  -1   8  14   25.40    4.20
  -1  -8  14   27.20    4.20
   1   8  14   28.90    7.00
   1  -8 -14   20.00    7.00
  -2  -8 -14   89.19   14.40
  -2  -8 -14  100.89   15.10
  -2   8  14  109.19   10.90
   2   8 -14  124.09   19.20
  -2  -8  14  115.59   10.90
   2  -8 -14  130.59   15.70
  -2   8 -14  129.59   19.40
   2   8  14  116.29   15.00
  -3  -8 -14  334.97   37.60
  -3   8  14  444.26   34.90
   3   8 -14  373.66   42.10
  -3   8 -14  426.86   36.40
  -3  -8  14  390.16   36.80
  -3   8 -14  478.25   41.30
   3   8  14  463.95   38.80
   4   8 -14  234.58   30.40
  -4  -8 -14  212.28   26.60
   4   8  14  280.07   26.10
  -4  -8  14  244.08   26.90
  -4   8 -14  291.57   25.90
  -5  -8 -14  223.38   25.40
   5   8 -14  253.67   28.70
   5   8  14  286.67   24.80
  -6  -8 -14   55.39    9.80
   0  -9 -14  325.57   29.60
   0   9  14  336.87   27.60
   0   9  14  308.07   26.10
   0  -9  14  312.37   25.80
   0   9 -14  240.98   26.40
  -1   9  14    7.40    3.00
   1   9 -14    5.40    4.10
   1  -9  14    6.50    2.60
   1   9 -14    7.80    9.90
  -1  -9 -14    7.00    6.40
   1  -9 -14   12.60    6.70
  -1  -9  14    7.90    2.90
   1   9  14    7.30    5.50
  -2   9  14  160.28   15.00
  -2  -9 -14  109.39   18.20
   2   9 -14  148.89   22.80
  -2  -9 -14  151.58   18.40
  -2  -9  14  181.38   15.10
   2   9  14  172.38   18.50
   2  -9 -14  187.48   20.00
  -2   9 -14  178.28   23.20
  -3  -9 -14   35.90   10.40
  -3   9  14   61.99    6.90
   3   9 -14   50.29   15.10
   3   9  14   69.99   11.10
  -3   9 -14   54.29    8.80
  -3  -9  14   46.20   10.20
  -3   9 -14   64.49   13.10
   4   9 -14   22.00   11.80
  -4   9 -14   20.70    6.50
   4   9  14   17.80    7.40
   5   9 -14   46.30   11.70
  -5  -9 -14   30.80    8.60
   5   9  14   40.50    7.70
   0 -10 -14  469.55   43.70
   0  10  14  434.76   40.70
   0 -10  14  516.35   40.70
   0  10  14  525.75   41.70
   1 -10  14   27.80    4.60
   1  10 -14   36.00   10.90
  -1 -10 -14   23.00    8.00
  -1  10  14   24.20    4.70
   1 -10 -14   31.30    8.60
  -1 -10  14   25.70    4.60
   1  10  14   26.70    6.70
   2  10 -14  327.27   32.80
  -2  10  14  283.67   25.30
  -2 -10 -14  272.17   28.30
   2  10  14  284.37   27.80
  -2  10 -14  330.27   33.10
   2 -10 -14  274.37   29.10
  -2 -10  14  304.07   25.30
   3  10 -14  147.99   22.30
   3 -10 -14  145.09   19.90
  -3  10 -14  208.48   21.90
   3  10  14  144.19   17.80
   4  10 -14   27.10   10.90
   4  10  14   20.90    6.70
   5  10 -14  165.18   19.60
   5  10  14  157.68   16.60
   0 -11 -14    6.90    6.90
   0 -11  14    7.10    3.10
   1 -11  14  360.26   30.90
  -1 -11 -14  342.27   34.20
   1  11  14  383.36   32.40
   1 -11 -14  353.16   34.50
  -1 -11  14  380.16   31.00
   2  11 -14  299.37   30.70
   2 -11  14  287.57   25.40
  -2 -11  14  301.77   25.40
  -2  11 -14  358.36   33.30
   2 -11 -14  274.87   29.40
   2  11  14  281.37   27.30
  -3 -11 -14  198.28   19.10
   3  11 -14  183.58   23.20
   3 -11 -14  189.98   22.20
   3  11  14  191.78   19.30
   4  11 -14   32.10    9.70
   4  11  14   26.60    6.50
   0 -12  14   47.60    6.60
   0 -12 -14   48.30   10.30
  -1 -12 -14   14.70    7.20
   1 -12  14    6.50    3.20
   1 -12 -14    5.50    7.10
  -1 -12  14    9.80    3.30
   2 -12  14   -0.80    2.90
  -2 -12  14    3.30    2.70
  -2  12 -14    4.50    8.70
   2  12  14    1.90    3.80
   2 -12 -14    3.60    6.50
   3  12 -14   75.99   11.80
   3  12  14   61.39    9.10
   3 -12 -14   68.09   12.20
   0 -13  14   12.10    3.50
   0 -13 -14   15.40    6.80
   1 -13  14   22.90    4.20
  -1 -13 -14   21.80    7.90
   1 -13 -14   28.20    7.90
  -1 -13  14   20.80    4.00
   2 -13  14    0.40    3.00
   2 -13 -14   -1.50    6.00
   0   0  15   -0.20    1.60
   0   0 -15    1.50    4.40
  -1   0  15  654.03   49.90
  -1   0 -15  566.14   50.89
  -2   0 -15  451.45   41.90
  -2   0  15  516.55   40.60
  -2   0  15  526.15   41.00
   3   0 -15  132.99   14.90
  -3   0  15  148.69   12.70
  -3   0 -15  158.88   17.60
  -3   0 -15  154.28   15.40
  -3   0  15  166.68   13.50
  -4   0  15   25.40    3.90
  -4   0 -15   28.30    7.70
  -4   0 -15   19.30    6.00
  -5   0  15  386.06   31.10
  -5   0 -15  365.06   34.70
  -6   0  15  635.94   52.89
  -7   0 -15    3.20    9.20
   0   1  15  690.03   57.89
   0  -1 -15  731.13   59.39
   0   1 -15  737.93   59.39
   1   1 -15  142.89   14.30
  -1   1  15  144.19   11.40
  -1  -1 -15  113.59   13.50
   1   1 -15  100.49   12.90
  -1   1  15  136.79   11.00
  -1   1 -15  121.69   13.20
  -1  -1  15  137.59   11.60
   2   1 -15  241.58   23.80
  -2   1  15  287.07   22.20
  -2  -1 -15  232.88   23.60
  -2   1  15  282.47   21.80
  -2  -1  15  278.17   22.40
  -2   1 -15  253.57   23.50
   3   1 -15  591.34   60.49
  -3   1  15  790.92   56.89
   3   1 -15  661.93   58.69
  -3  -1 -15  685.43   58.19
  -3   1  15  714.03   56.39
  -3  -1 -15  707.43   60.39
  -3   1 -15  681.03   60.49
  -3   1 -15  666.03   57.79
  -3  -1  15  662.23   56.29
  -3  -1  15  804.82   57.09
  -4   1  15   54.79    5.90
  -4  -1 -15   56.19   10.30
   4   1 -15   46.30    8.10
  -4  -1 -15   52.29    8.90
  -4  -1  15   54.79    6.40
  -4   1 -15   53.49   10.30
  -4   1 -15   48.80    7.60
  -5   1  15  106.79   10.60
  -5  -1 -15  119.79   15.50
  -5   1 -15  161.18   27.80
  -5   1 -15  125.49   14.90
  -5  -1  15  119.39   11.00
  -6   1  15  526.55   40.00
  -6  -1  15  486.15   40.20
  -6   1 -15  412.96   38.70
  -7  -1 -15   11.60   10.00
  -7   1 -15   16.40   11.60
   0   2 -15    3.10    4.60
   0  -2 -15    1.00    4.50
   0   2  15    0.50    1.40
   0   2  15    0.90    1.10
  -1   2  15  720.13   55.69
   1   2 -15  757.62   57.49
  -1  -2 -15  597.44   56.99
  -1  -2  15  687.03   55.99
   1   2  15  675.93   55.29
  -1   2 -15  694.63   56.99
  -2   2  15  516.45   38.30
   2   2 -15  410.06   42.60
   2   2 -15  435.46   40.40
  -2  -2 -15  414.76   40.10
  -2   2  15  518.25   38.60
  -2   2 -15  474.25   39.80
  -2  -2  15  501.75   39.00
  -3   2  15  403.56   29.20
   3   2 -15  358.46   31.80
  -3  -2 -15  371.56   33.40
   3   2 -15  307.07   34.80
  -3  -2 -15  346.07   31.60
  -3  -2  15  312.27   29.00
  -3  -2  15  402.96   30.10
  -3   2 -15  325.27   33.60
  -3   2 -15  359.26   30.70
   4   2 -15  306.17   31.50
  -4  -2 -15  344.57   31.70
  -4  -2 -15  351.76   33.20
  -4   2  15  395.56   29.20
  -4   2 -15  464.05   44.70
  -4   2 -15  281.57   29.80
  -4   2 -15  365.16   33.60
  -4  -2  15  372.46   29.70
  -5   2  15  191.18   16.90
  -5  -2 -15  213.88   21.90
  -5  -2  15  210.78   17.60
  -5   2 -15  182.18   19.70
  -5   2 -15  242.28   34.10
  -6   2  15    3.50    2.80
  -6  -2 -15    0.00    4.00
  -6   2 -15    7.40   12.70
  -6  -2  15    4.40    3.30
  -6   2 -15    3.80    1.90
  -7   2 -15   14.10   13.80
   0   3 -15  261.67   21.70
   0   3  15  222.38   19.10
   0   3  15  231.68   18.80
   0  -3 -15  203.28   21.40
   1   3 -15  442.16   35.20
  -1   3  15  429.76   33.00
   1   3 -15  307.97   39.80
  -1  -3 -15  338.87   34.70
  -1   3  15  411.36   32.70
  -1   3 -15  453.65   34.80
   1   3  15  410.36   32.50
  -1  -3  15  379.46   33.40
  -2   3  15   77.19    7.40
  -2   3  15   85.59    7.90
   2   3 -15   65.39    9.80
  -2  -3 -15   60.89   10.20
   2   3 -15   74.39   13.90
  -2  -3  15   78.09    8.90
  -2   3 -15   80.79    9.90
  -2  -3  15   99.59    8.00
   2   3  15  105.49   11.90
  -2   3 -15   93.39   17.90
  -2   3 -15   80.59   13.80
   2  -3 -15   85.09   12.40
   3   3 -15   63.69   13.10
  -3   3  15   64.09    5.90
  -3  -3 -15   40.10    8.70
  -3  -3 -15   55.89    9.70
  -3   3  15   58.09    5.40
   3   3 -15   49.00    8.00
  -3   3 -15   45.60   10.40
  -3   3 -15   57.09   16.20
  -3   3 -15   47.80    7.40
  -3  -3  15   50.49    7.00
  -4  -3 -15  133.69   17.50
  -4  -3 -15  143.79   17.30
   4   3 -15  144.99   16.10
   4   3 -15  136.79   21.60
  -4   3  15  175.68   13.40
  -4   3 -15  157.08   18.60
  -4  -3  15  153.38   14.30
  -4   3 -15  132.79   16.20
  -4   3 -15  165.48   28.40
  -5  -3 -15   28.30    7.80
  -5  -3  15   53.59    8.50
  -5   3 -15   59.19    5.60
  -5   3 -15   42.30   18.20
  -6  -3 -15    8.90    5.40
  -6   3  15   23.40    3.80
  -6   3 -15    3.10   12.90
  -6  -3  15   19.10    4.50
  -6   3 -15   15.30    2.70
   0   4  15  522.65   40.70
   0   4  15  480.95   40.90
   0  -4 -15  506.15   43.60
  -1  -4 -15    8.00    6.10
  -1   4  15    7.90    1.70
   1   4 -15   18.30    8.60
   1   4 -15    6.40    4.10
  -1   4  15   15.10    4.20
  -1  -4 -15   11.00    6.00
  -1   4  15    7.40    2.10
   1   4  15   13.70    5.00
   1   4  15    9.60    1.70
  -1   4 -15   14.10    5.10
   1  -4 -15   13.70    6.20
  -1  -4  15   14.80    2.80
  -1  -4  15   11.30    5.40
   2   4 -15  161.48   18.10
  -2   4  15  188.78   15.60
  -2  -4 -15  181.68   19.10
   2   4 -15  173.58   22.80
  -2   4  15  201.58   16.00
  -2   4 -15  194.78   27.10
  -2   4 -15  183.68   22.10
   2   4  15  235.38   19.90
  -2   4 -15  193.18   17.90
   2  -4 -15  174.28   19.80
  -2  -4  15  170.58   16.90
   3   4 -15  332.57   36.80
  -3   4  15  426.76   30.60
  -3   4  15  402.76   30.30
  -3  -4 -15  327.77   35.60
   3   4 -15  327.27   32.90
  -3  -4 -15  358.16   33.30
  -3   4 -15  405.66   43.70
  -3   4 -15  347.37   35.50
  -3   4 -15  343.87   31.70
  -3  -4  15  394.26   31.50
  -4   4  15   19.00    3.00
   4   4 -15   13.60    5.50
  -4  -4 -15   10.30    7.30
   4   4 -15   19.90   11.40
  -4  -4 -15   16.50    6.70
  -4  -4  15    9.90    4.30
  -4   4 -15   16.60   14.10
  -4   4 -15   10.40    7.00
  -5   4 -15  179.88   14.70
  -5  -4  15  159.38   17.10
  -6   4  15   55.79    5.50
  -6   4 -15   45.90    4.80
  -6  -4  15   38.90    6.70
  -6   4 -15   23.40   16.50
   0   5  15  178.08   15.40
   0  -5 -15  169.88   19.10
   0   5 -15  127.79   20.70
   0   5  15  180.88   15.90
   0  -5  15  211.68   16.40
   0   5  15  210.48   18.20
  -1  -5 -15  149.79   19.30
  -1   5  15  188.88   15.90
  -1  -5 -15  186.28   19.60
  -1   5  15  179.88   16.30
   1   5 -15  170.78   22.80
   1  -5 -15  176.18   19.80
   1   5  15  184.78   15.70
  -1  -5  15  225.18   16.60
   1   5  15  209.58   19.20
  -2  -5 -15   69.89   10.40
   2   5 -15   52.79   12.90
  -2   5  15   57.59    6.30
   2   5 -15   45.00    8.50
  -2   5  15   57.39    5.80
  -2  -5 -15   47.40    9.40
  -2   5 -15   62.29   12.70
  -2  -5  15   63.79    6.30
   2  -5 -15   72.49   11.00
  -2   5 -15   74.19    9.40
  -2   5 -15   70.79   18.40
   2   5  15   68.49   10.20
  -2  -5  15   60.79    8.20
  -3   5  15  186.88   14.80
   3   5 -15  139.29   17.50
   3   5 -15  136.99   22.20
  -3  -5 -15  161.88   19.10
  -3   5  15  198.78   15.20
  -3   5 -15  184.78   30.70
   3   5  15  215.08   20.10
  -3  -5  15  168.88   16.50
  -3   5 -15  168.88   16.80
  -3   5 -15  167.48   21.10
   4   5 -15   69.09   16.20
  -4  -5 -15   83.29   12.10
  -4  -5 -15   78.29   12.60
  -4   5  15   69.69    7.00
  -4   5 -15   67.19   11.90
  -4   5 -15   87.49   22.90
  -4  -5  15   57.89    8.40
  -5  -5 -15   47.80   10.50
   5   5 -15   54.89   14.60
  -5  -5 -15   63.19   11.40
  -5  -5  15   59.09    7.60
  -5   5 -15   68.49   21.90
  -6  -5 -15   95.09   14.20
  -6  -5  15  121.89   11.60
   0   6 -15   40.10   10.80
   0  -6 -15   52.49    9.60
   0  -6  15   57.49    6.30
   0   6  15   60.19    6.40
   0   6  15   63.79    5.60
   0   6  15   52.99    8.20
  -1   6  15   25.50    3.90
  -1  -6 -15   21.40    7.50
  -1   6  15   37.80    5.70
   1   6 -15   36.70   11.00
  -1  -6 -15   33.80    7.60
  -1   6  15   27.40    3.60
   1  -6  15   32.10    4.60
   1   6 -15   19.80    6.20
   1   6  15   28.20    3.20
  -1  -6  15   23.50    3.80
   1  -6 -15   33.40    8.10
   1   6  15   29.70    6.40
  -2  -6 -15  121.09   17.20
  -2  -6 -15  144.59   17.20
   2   6 -15  155.08   22.00
  -2   6  15  163.18   13.30
  -2   6  15  167.88   13.80
   2   6 -15  128.99   16.20
   2   6  15  166.18   17.40
  -2  -6  15  140.19   15.20
   2  -6 -15  148.79   17.90
  -2   6 -15  145.99   20.80
  -2   6 -15  165.68   16.30
  -2  -6  15  168.28   13.70
  -3   6  15  288.67   24.00
  -3  -6 -15  266.17   27.70
   3   6 -15  248.18   27.10
  -3   6  15  326.67   24.50
   3   6 -15  270.77   32.60
   3   6  15  347.67   28.70
  -3   6 -15  277.87   25.80
  -3  -6  15  280.17   25.80
  -3   6 -15  287.07   30.50
  -3   6 -15  288.67   40.70
   4   6 -15  242.48   31.50
  -4  -6 -15  254.37   32.80
  -4  -6 -15  255.17   26.90
  -4   6  15  279.77   23.00
  -4   6 -15  284.27   27.60
  -4   6 -15  290.07   42.10
   4   6  15  333.97   27.80
  -4  -6  15  249.88   24.40
  -5  -6 -15  357.26   34.20
   5   6 -15  356.66   37.20
  -6  -6 -15   24.60    7.30
  -6  -6  15   21.30    4.70
  -6   6 -15   35.70    3.40
   0   7 -15   37.20   10.30
   0  -7  15   33.70    4.90
   0   7  15   44.20    7.40
   0  -7 -15   38.90    8.60
   0   7  15   40.00    4.40
   0   7  15   39.10    5.30
   1   7 -15  330.27   36.30
  -1  -7 -15  346.37   33.50
  -1   7  15  357.16   30.70
  -1   7  15  430.96   31.90
  -1   7  15  369.46   30.20
   1  -7  15  386.76   30.70
   1   7  15  375.86   33.00
  -1  -7  15  368.96   30.60
   1   7  15  339.67   30.00
   1  -7 -15  343.47   33.80
   2   7 -15   85.19   17.60
  -2   7  15  125.19   11.20
  -2  -7 -15   74.29   14.10
  -2  -7 -15  104.19   14.80
  -2   7  15  124.59   10.70
   2   7  15  119.79   15.10
  -2   7 -15  135.99   14.60
  -2  -7  15  103.09   13.30
  -2  -7  15  138.19   11.20
  -2   7 -15   95.79   17.60
   2  -7 -15  128.39   16.60
  -3   7  15   85.49    8.60
   3   7 -15   89.89   18.30
  -3  -7 -15   71.69   12.60
  -3  -7  15   81.59   11.10
  -3   7 -15   82.09   11.30
   3   7  15   99.19   13.90
  -3   7 -15   92.49   15.80
  -4   7  15    8.20    2.40
  -4  -7 -15    4.10    6.70
   4   7 -15    9.50   11.60
  -4   7 -15    5.40    6.70
   4   7  15    8.50    6.40
  -4  -7  15    7.90    5.20
  -5  -7 -15  157.48   19.40
   5   7 -15  185.88   23.20
  -6  -7 -15   56.89    9.80
   6   7 -15   57.59   14.80
  -6  -7  15   71.39    7.80
   0   8  15 1062.89   89.39
   0   8  15 1128.29   90.19
   0   8  15 1193.38   91.59
   0  -8 -15 1081.79   92.79
   0  -8  15 1098.49   89.89
  -1  -8 -15    7.10    6.40
   1  -8  15   10.70    2.80
   1   8 -15   10.20   10.10
  -1   8  15    7.30    2.20
  -1   8  15    7.80    3.00
   1   8 -15    5.10    5.60
   1   8  15    1.00    5.00
  -1  -8  15    7.80    2.70
   1  -8 -15    8.90    6.60
  -2   8  15  267.27   21.80
  -2  -8 -15  218.78   24.70
   2   8 -15  230.78   29.70
  -2  -8 -15  186.28   25.00
   2   8  15  268.27   25.20
  -2   8 -15  262.07   29.40
   2  -8 -15  255.57   26.20
  -2  -8  15  276.17   21.80
  -3   8  15   11.70    3.00
  -3  -8 -15   15.50    8.00
   3   8 -15   11.70   11.50
  -3   8 -15   11.70    8.70
   3   8  15   12.20    6.60
  -3  -8  15    8.10    6.30
  -3   8 -15   11.60    5.80
   4   8 -15  159.08   24.10
  -4   8 -15  192.78   18.90
   4   8  15  140.49   18.40
  -5  -8 -15  193.88   23.20
   5   8 -15  223.88   26.00
   5   8  15  249.18   22.00
   0   9  15   80.49   10.50
   0   9  15   77.79    8.70
   0  -9  15   78.09    8.20
   0  -9 -15   68.69   12.30
  -1  -9 -15  154.58   18.70
   1  -9  15  151.38   14.30
  -1   9  15  154.78   14.70
   1   9 -15  151.68   22.10
   1   9  15  162.38   17.20
  -1  -9  15  168.78   14.60
   1  -9 -15  156.08   19.00
   2   9 -15   65.39   15.70
  -2  -9 -15   49.50   11.10
  -2  -9 -15   56.69   11.20
  -2   9  15   65.49    7.70
  -2  -9  15   67.39    7.50
   2   9  15   72.59   11.20
  -2   9 -15   81.59   15.70
   2  -9 -15   73.29   12.50
  -3   9  15  118.69   11.40
   3   9 -15  122.49   20.30
  -3  -9 -15   97.39   15.20
  -3   9 -15  154.28   19.60
   3   9  15  139.19   15.80
  -3   9 -15   95.79   13.30
   3  -9 -15  120.49   17.40
   4   9 -15   79.09   17.10
   4   9  15   90.59   13.50
  -4   9 -15  120.09   13.50
  -5  -9 -15   11.60    7.00
   5   9 -15   20.40    9.60
   5   9  15   16.10    5.50
   0  10  15  113.89   11.70
   0 -10 -15   95.99   14.70
   0  10  15   95.79   10.80
   0 -10  15  100.49   10.20
  -1 -10 -15   50.29   10.30
   1 -10  15   45.80    6.20
   1  10 -15   63.49   15.00
  -1  10  15   45.70    6.50
  -1 -10  15   43.30    6.20
   1  10  15   46.20    8.10
   1 -10 -15   52.29   10.80
   2 -10  15  441.26   35.70
   2  10 -15  390.76   41.30
  -2  10  15  425.46   35.50
  -2  10 -15  395.66   37.50
   2  10  15  414.56   37.50
  -2 -10  15  433.96   35.30
  -2  10 -15  462.75   42.70
   2 -10 -15  385.56   38.90
   3  10 -15  178.88   25.10
   3 -10 -15  160.88   21.20
   3  10  15  169.38   19.20
  -3  10 -15  234.78   23.50
   4  10 -15    2.20    8.80
   4  10  15    3.20    5.20
   0 -11  15    1.40    2.70
   0 -11 -15    6.20    7.10
  -1 -11 -15   75.79   11.90
   1 -11  15   60.39    7.40
   1  11  15   64.39    9.40
   1 -11 -15   69.99   12.50
  -1 -11  15   65.49    7.70
   2  11 -15  156.88   21.40
   2 -11  15  175.58   15.80
   2 -11 -15  155.68   20.20
  -2 -11  15  170.78   15.70
  -2  11 -15  206.58   24.00
   2  11  15  183.68   17.80
   3  11 -15   60.69   12.60
   3  11  15   44.20    8.00
   3 -11 -15   54.49   11.50
   4  11 -15   83.49   12.90
   4  11  15   77.29   10.20
   0 -12 -15  177.08   20.00
   0 -12  15  185.08   16.50
  -1 -12 -15   73.09   12.50
   1 -12  15   80.29    8.70
  -1 -12  15   88.49    8.70
   1 -12 -15   69.09   12.10
   2 -12  15   25.20    4.70
   2  12  15   24.50    5.40
   2 -12 -15   33.10    9.10
  -2 -12  15   24.70    4.20
  -2  12 -15   34.70   10.80
   3  12 -15   53.09    9.80
   3 -12 -15   45.90   10.70
   3  12  15   46.10    7.10
   0 -13 -15    8.00    6.80
   0 -13  15   15.70    3.60
   1 -13  15   60.79    6.60
  -1 -13 -15   62.59   10.10
   1 -13 -15   40.70    9.40
  -1 -13  15   45.60    6.20
   2 -13 -15   18.30    7.30
   0   0 -16  302.97   27.00
  -1   0  16  612.54   47.00
  -1   0 -16  533.75   48.20
  -2   0  16  170.78   13.30
  -2   0  16  165.88   12.80
  -2   0 -16  139.39   15.00
   2   0 -16  122.99   14.60
   2   0 -16  143.99   18.60
  -3   0  16   17.70    2.40
   3   0 -16   13.10    4.70
   3   0 -16   13.00    8.00
  -3   0 -16   20.20    7.10
  -3   0 -16   13.90    5.10
  -3   0  16   15.60    3.20
  -4   0 -16    4.30    5.20
  -4   0 -16    5.70    5.70
  -4   0  16    1.80    2.30
  -4   0  16    8.20    4.70
  -5   0  16  201.98   17.60
  -5   0 -16  213.38   22.10
  -6   0  16  190.48   17.80
   0  -1 -16 1006.60   82.59
   0   1  16 1025.80   80.89
   0   1 -16  992.20   82.59
  -1  -1 -16  189.28   19.00
  -1   1  16  235.78   17.20
   1   1 -16  164.58   18.70
   1   1  16  204.58   16.60
  -1   1 -16  190.38   18.80
  -1  -1  16  216.58   17.40
   2   1 -16  107.79   16.20
  -2   1  16  132.39   10.50
  -2   1  16  138.79   11.00
  -2  -1 -16   99.39   13.30
   2   1 -16  100.59   12.60
  -2   1 -16  115.19   16.10
  -2   1 -16  123.19   13.00
  -2  -1  16  131.29   11.30
   2  -1 -16  116.79   16.20
  -3   1  16   25.60    2.90
   3   1 -16   17.70    5.10
   3   1 -16   17.30    8.90
  -3  -1 -16   17.10    5.90
  -3  -1 -16   22.50    7.20
  -3   1  16   26.60    3.70
   3  -1 -16   21.60    9.00
   3  -1 -16   16.60    4.80
  -3  -1  16   24.90    3.90
  -3  -1  16   19.30    2.80
  -3   1 -16   20.90    7.30
  -3   1 -16   27.30    5.80
  -4   1  16  237.08   17.80
  -4  -1 -16  220.78   22.50
  -4  -1 -16  185.88   20.30
   4   1 -16  176.28   19.90
  -4   1 -16  207.78   22.70
  -4   1 -16  168.28   19.10
  -4  -1  16  231.38   18.10
  -5   1  16   31.10    4.10
  -5  -1 -16   37.90    8.90
  -5   1 -16   45.00   17.30
  -5   1 -16   35.20    8.20
  -5  -1  16   32.00    4.60
  -6   1  16  161.18   14.20
  -6   1 -16  128.29   12.60
  -6  -1  16  145.39   14.30
   0   2  16  324.87   25.50
   0  -2 -16  282.37   27.70
   0   2  16  313.97   25.80
   0   2 -16  319.07   27.80
   1   2 -16  365.16   36.30
  -1   2  16  432.36   32.40
  -1   2  16  430.56   32.10
   1   2 -16  369.66   35.20
   1   2 -16  339.97   34.20
  -1  -2 -16  349.77   34.10
   1   2  16  404.66   31.90
  -1   2 -16  424.76   34.10
  -1  -2  16  403.56   32.70
  -2  -2 -16  102.29   12.80
   2   2 -16   94.79   11.80
  -2   2  16  110.49    9.30
   2   2 -16  112.79   16.20
  -2   2  16  122.89    9.90
  -2   2 -16   86.19   15.10
  -2   2 -16   99.99   11.60
  -2   2 -16  117.89   20.10
  -2  -2  16  101.29   10.40
   2  -2 -16  110.89   15.10
   3   2 -16  180.08   19.50
  -3  -2 -16  210.78   21.90
  -3   2  16  214.78   17.00
  -3   2  16  236.08   17.50
  -3  -2 -16  185.58   19.90
   3   2 -16  192.98   24.30
  -3  -2  16  179.78   16.80
  -3  -2  16  222.58   18.00
  -3   2 -16  196.58   22.40
  -3   2 -16  195.28   18.90
   4   2 -16   57.19    9.80
  -4  -2 -16   67.29   10.70
  -4   2  16   75.19    7.30
  -4  -2 -16   81.99   12.80
  -4   2 -16   83.09   13.70
  -4   2 -16  111.69   23.20
  -4   2 -16   61.99    8.70
  -4  -2  16   76.19    8.10
  -5  -2 -16  120.79   15.70
  -5   2  16  104.79   10.10
  -5  -2  16  108.79   10.80
  -5   2 -16  123.99   14.00
  -5   2 -16  149.69   27.00
  -6   2  16  172.58   14.40
  -6  -2  16  153.58   14.90
  -6   2 -16  131.89   13.00
   0   3  16  254.87   21.50
   0   3 -16  292.37   24.30
   0  -3 -16  240.58   24.10
   0   3  16  255.17   21.90
   0  -3 -16  283.27   25.20
  -1  -3 -16   26.80    6.60
  -1   3  16   42.50    5.90
   1   3 -16   29.50    6.70
   1   3 -16   16.00    5.30
  -1  -3 -16   24.60    7.30
  -1   3  16   22.50    3.50
   1   3 -16   23.90    9.50
  -1   3  16   26.60    3.20
  -1  -3  16   31.80    4.40
  -1   3 -16   20.70    5.60
   1   3  16   33.20    6.40
   1  -3 -16   31.30    7.70
  -1  -3  16   24.30    4.40
   1   3  16   25.80    3.00
  -2   3  16   37.70    4.50
  -2   3  16   42.50    5.10
  -2  -3 -16   37.50    8.00
   2   3 -16   37.10    7.30
   2   3 -16   49.40   11.80
  -2   3 -16   44.40   10.80
  -2  -3  16   56.29    5.30
   2   3  16   50.09    8.30
  -2   3 -16   35.50   13.50
   2  -3 -16   51.79    9.80
  -2  -3  16   41.20    6.00
  -2   3 -16   34.00    6.90
  -3   3  16   29.20    3.30
  -3   3  16   31.10    3.90
   3   3 -16   21.90    5.70
   3   3 -16   30.30   10.80
  -3  -3 -16   18.20    6.80
  -3  -3 -16   19.00    7.00
  -3  -3  16   27.40    4.90
  -3   3 -16   21.30   12.60
  -3   3 -16   23.40    8.50
  -3   3 -16   19.10    5.30
  -4  -3 -16  277.77   27.70
   4   3 -16  255.37   30.60
   4   3 -16  240.08   25.60
  -4   3  16  326.67   23.00
  -4  -3 -16  265.27   26.10
  -4  -3  16  285.37   23.70
  -4   3 -16  212.18   23.60
  -4   3 -16  327.27   39.00
  -4   3 -16  282.27   28.10
  -5  -3 -16  260.77   28.00
  -5  -3 -16  354.86   31.60
  -5   3  16  309.27   26.10
  -5  -3  16  325.67   26.90
  -5   3 -16  311.87   28.20
  -5   3 -16  419.06   44.90
  -6   3  16   16.30    3.50
  -6  -3 -16    7.00    5.10
  -6   3 -16   13.80    2.50
  -6   3 -16    8.90   13.10
  -6  -3  16   16.20    4.40
   0   4 -16  260.67   22.10
   0  -4 -16  235.18   22.60
   0   4 -16  178.58   23.80
   0   4  16  233.58   18.60
   0   4  16  237.98   19.10
   0  -4 -16  175.58   22.60
  -1   4  16  283.57   23.40
   1   4 -16  301.67   26.30
  -1  -4 -16  289.67   26.60
  -1   4  16  290.67   23.00
  -1  -4 -16  232.48   25.70
   1   4 -16  245.38   28.70
  -1   4 -16  324.27   25.70
   1  -4 -16  284.77   27.10
  -1  -4  16  245.08   24.10
   1   4  16  292.17   22.90
  -2   4  16  546.45   37.90
   2   4 -16  396.56   39.90
  -2   4  16  525.15   37.50
   2   4 -16  415.16   43.10
  -2  -4 -16  399.16   39.80
  -2   4 -16  423.76   43.20
   2  -4 -16  463.35   41.30
  -2   4 -16  481.55   39.40
  -2  -4  16  459.95   38.50
  -2   4 -16  444.76   47.80
   3   4 -16   91.99   16.60
   3   4 -16   89.39   12.20
  -3   4  16  110.69    9.20
  -3  -4 -16   82.39   13.00
  -3   4  16  112.39    9.60
  -3   4 -16   90.99   11.50
   3   4  16  138.99   15.30
  -3   4 -16  110.99   23.00
  -3   4 -16   94.39   16.00
  -3  -4  16   97.59   10.70
  -4  -4 -16  110.69   15.20
   4   4 -16  122.89   20.20
  -4  -4 -16  125.29   16.40
  -4   4  16  122.59   11.00
  -4   4 -16  129.19   17.10
  -4   4 -16  165.48   30.20
  -4  -4  16  108.49   12.00
  -5  -4 -16  139.09   17.20
  -5  -4 -16  110.19   14.90
   5   4 -16  149.88   21.20
  -5   4  16  118.89   11.10
  -5  -4  16  132.19   12.40
  -5   4 -16  165.38   30.70
  -6   4  16  135.69   10.50
  -6  -4  16   91.19   11.50
  -6   4 -16   62.59   21.50
  -6   4 -16  117.39   10.00
   0   5  16  755.42   59.59
   0   5 -16  643.14   62.99
   0   5  16  749.53   59.19
   0  -5 -16  777.62   62.59
  -1  -5 -16  125.89   17.40
  -1   5  16  151.18   13.70
  -1  -5 -16  157.48   18.00
  -1   5  16  151.08   14.10
   1   5 -16  135.99   21.20
  -1   5 -16  170.98   17.10
   1  -5 -16  159.38   18.00
  -1  -5  16  192.18   14.50
   1   5  16  158.68   13.50
   1   5  16  186.08   17.20
   2   5 -16  701.93   67.49
  -2  -5 -16  692.53   66.99
  -2   5  16  806.52   61.99
  -2   5  16  854.81   62.39
  -2   5 -16  685.93   67.59
  -2   5 -16  781.62   73.69
  -2  -5  16  759.22   63.09
   2  -5 -16  739.03   65.39
  -2   5 -16  837.02   64.09
   3   5 -16  123.39   15.40
   3   5 -16  144.29   21.50
  -3  -5 -16  145.39   17.20
  -3   5  16  141.49   12.20
  -3   5  16  151.18   12.70
  -3   5 -16  147.09   19.70
  -3   5 -16  169.08   29.30
  -3   5 -16  138.09   14.60
  -3  -5  16  129.59   13.90
  -4  -5 -16  178.98   21.40
  -4  -5 -16  179.58   20.50
   4   5 -16  167.58   25.30
  -4   5  16  202.38   16.20
  -4   5 -16  228.88   35.10
  -4   5 -16  186.08   21.40
  -4  -5  16  173.78   17.40
   5   5 -16   61.79   16.10
  -5  -5 -16   68.59   13.20
  -5   5 -16   91.89   25.30
  -5  -5  16  121.79   11.90
  -6  -5 -16   91.79   14.40
  -6  -5  16  136.19   12.20
   0   6  16  854.41   63.49
   0   6  16  753.32   61.69
   0  -6 -16  674.63   64.19
   0  -6  16  792.02   61.79
   0   6  16  714.43   61.09
  -1   6  16  367.66   29.00
   1   6 -16  275.27   34.40
  -1   6  16  359.26   28.50
  -1  -6 -16  335.97   32.10
   1   6  16  376.06   31.40
   1   6  16  329.77   28.20
  -1  -6  16  363.26   29.00
   1  -6 -16  324.07   32.20
  -2   6  16  361.16   28.20
  -2  -6 -16  296.97   31.20
  -2  -6 -16  271.67   31.20
   2   6 -16  313.07   35.40
  -2   6  16  374.76   28.70
   2   6  16  404.26   32.10
  -2  -6  16  339.27   29.80
   2  -6 -16  333.37   32.10
  -2   6 -16  326.87   35.20
  -2   6 -16  357.86   30.70
  -3   6  16  215.78   16.10
   3   6 -16  182.48   25.90
  -3  -6 -16  156.28   19.90
   3   6 -16  149.88   18.70
  -3   6 -16  184.98   22.90
   3   6  16  227.28   20.70
  -3  -6  16  167.88   17.50
  -3   6 -16  166.48   17.80
   4   6 -16  130.89   22.00
  -4   6  16  171.18   13.80
  -4  -6 -16  132.29   18.00
  -4  -6 -16  133.99   19.40
  -4  -6  16  145.19   15.20
   4   6  16  186.88   18.80
  -4   6 -16  162.18   19.30
  -5  -6 -16   14.10    7.50
   5   6 -16   12.90   10.90
  -5   6 -16   25.60    3.40
   6   6 -16  168.38   23.90
  -6  -6 -16  190.28   21.30
  -6  -6  16  250.17   19.50
   0   7  16  576.34   47.00
   0   7 -16  465.35   50.09
   0  -7 -16  570.34   50.09
   0  -7  16  599.64   47.00
   0   7  16  641.84   48.80
   0   7  16  554.74   46.30
  -1   7  16  950.00   77.89
   1  -7  16 1072.49   78.09
   1   7 -16  831.72   82.19
  -1   7  16  970.20   77.39
  -1  -7 -16  886.61   80.29
   1   7  16 1038.60   80.09
   1  -7 -16  893.21   80.69
  -1  -7  16  993.30   77.89
   2   7 -16   22.50   12.20
   2   7 -16   16.80    6.20
  -2  -7 -16   14.50    8.20
  -2   7  16   30.60    3.90
  -2   7  16   28.40    4.50
  -2  -7 -16   28.70    8.00
  -2   7 -16   21.30   10.50
   2   7  16   27.20    7.40
  -2   7 -16   30.20    7.20
  -2  -7  16   27.90    4.20
   2  -7 -16   29.90    8.50
   3   7 -16   98.89   18.90
  -3  -7 -16   70.79   13.10
  -3   7  16  110.79    9.80
  -3   7 -16   93.69   12.30
  -3  -7  16   92.89   12.10
  -3   7 -16   93.19   16.40
   3   7  16  118.79   14.90
   4   7 -16  115.99   20.60
  -4   7  16  128.29   11.70
  -4  -7 -16  127.39   16.50
  -4  -7  16  110.99   13.50
  -4   7 -16  143.49   17.10
   4   7  16  159.78   16.70
  -5  -7 -16  167.88   21.40
   5   7 -16  183.78   24.20
   5   7  16  231.38   20.60
  -6  -7 -16   46.60    8.40
   0   8  16   27.70    4.50
   0   8  16   26.80    3.60
   0  -8 -16   26.50    8.30
   0  -8  16   26.70    4.20
   0   8  16   24.00    6.00
  -1   8  16  422.26   35.60
   1  -8  16  441.46   35.50
  -1  -8 -16  414.46   38.70
   1   8 -16  359.76   40.70
   1   8  16  452.55   37.80
  -1  -8  16  457.05   35.50
   1  -8 -16  390.96   39.00
  -2  -8 -16  127.29   18.20
  -2  -8 -16  129.79   17.40
   2   8 -16  124.49   21.10
  -2   8  16  151.08   13.70
  -2   8 -16  138.99   16.70
  -2   8 -16  141.69   22.40
   2  -8 -16  141.39   18.50
  -2  -8  16  160.28   13.60
   2   8  16  173.98   17.70
  -3   8  16  194.18   15.90
   3   8 -16  179.38   26.20
  -3  -8 -16  147.59   19.60
   3  -8 -16  167.78   24.50
  -3   8 -16  162.28   17.70
  -3  -8  16  150.98   17.80
   3   8  16  199.68   20.10
  -3   8 -16  196.58   23.60
   4   8 -16  205.68   29.60
   4   8  16  260.07   25.50
  -4   8 -16  292.07   26.00
  -5  -8 -16   23.60    8.30
   5   8 -16   23.70   10.50
   5   8  16   33.60    7.30
   0   9  16  331.07   30.40
   0   9  16  386.66   31.60
   0  -9 -16  328.07   34.00
   0  -9  16  376.46   30.20
   1   9 -16  118.29   18.40
  -1   9  16  118.89   12.00
  -1  -9 -16  123.99   16.30
   1  -9  16  119.29   11.60
   1   9  16  124.59   14.40
  -1  -9  16  130.99   11.80
   1  -9 -16  121.39   17.20
  -2  -9 -16   79.39   14.60
  -2   9  16  125.29   11.90
  -2  -9 -16  118.59   15.80
   2   9 -16  113.09   19.60
   2   9  16  128.89   15.20
  -2   9 -16  136.69   21.40
  -2   9 -16  111.39   15.20
   2  -9 -16  124.79   17.10
  -2  -9  16  134.39   11.80
   3   9 -16   66.89   16.30
   3   9  16   85.19   12.70
   3  -9 -16   73.99   13.80
  -3   9 -16  103.59   17.10
   4   9 -16   48.70   13.60
  -4   9 -16   69.39   10.50
   4   9  16   45.80    9.00
  -5  -9 -16   17.10    8.30
   5   9 -16   37.50   10.20
   5   9  16   31.90    6.30
   0 -10  16   19.00    4.00
   0 -10 -16   23.00    8.40
   0  10  16   22.90    5.10
  -1 -10 -16  143.09   18.70
  -1  10  16  152.18   14.70
   1 -10  16  153.68   14.30
   1 -10 -16  135.39   19.30
  -1 -10  16  163.38   14.40
   1  10  16  173.88   16.60
   2  10 -16  218.08   25.00
   2 -10  16  184.28   17.40
  -2  10 -16  239.58   26.60
   2 -10 -16  176.88   21.90
   2  10  16  199.18   19.90
  -2 -10  16  198.08   17.50
   3  10 -16  110.59   18.00
   3 -10 -16  104.29   16.00
   3  10  16   94.79   13.40
  -3  10 -16  136.89   17.90
   4  10 -16   60.69   12.20
   4  10  16   37.20    7.40
   0 -11  16  169.08   15.10
   0 -11 -16  152.28   19.20
   1 -11  16  198.98   16.70
  -1 -11 -16  181.18   20.90
   1  11  16  181.58   17.70
   1 -11 -16  170.28   20.80
  -1 -11  16  180.28   16.60
   2 -11  16   65.99    7.90
   2  11 -16   70.19   12.70
  -2  11 -16  106.59   16.30
   2 -11 -16   79.79   12.80
   2  11  16   69.79    9.90
  -2 -11  16   69.29    7.80
   3  11 -16   23.60    9.70
   3  11  16   21.90    5.80
  -3  11 -16   29.00    8.80
   3 -11 -16   20.60    9.10
   4  11 -16   18.50    7.80
   4  11  16   13.40    4.70
   0 -12 -16    6.50    7.00
   0 -12  16   13.90    3.50
  -1 -12 -16   41.40    9.70
   1 -12  16   44.30    6.00
   1 -12 -16   38.60    9.50
  -1 -12  16   42.60    5.90
   2 -12  16   37.10    5.30
  -2 -12  16   33.60    5.10
  -2  12 -16   47.60   11.30
   2  12  16   34.40    6.00
   2 -12 -16   26.30    8.70
   3  12  16   50.79    7.50
   0 -13  16    3.70    2.70
   0 -13 -16    2.90    6.20
   1 -13  16   60.19    6.80
   1 -13 -16   53.49    9.90
  -1 -13  16   60.39    6.70
   0   0 -17   -0.50    4.20
  -1   0 -17  145.19   15.60
   1   0 -17  145.39   18.20
  -1   0  17  156.48   13.40
  -2   0 -17  225.18   21.90
   2   0 -17  235.78   25.10
  -2   0  17  267.87   20.30
  -2   0  17  245.08   19.70
  -2   0 -17  190.48   24.30
  -3   0  17   99.39    8.90
  -3   0  17   94.99    8.10
  -3   0 -17   87.09   13.90
  -3   0 -17   88.19   11.50
   3   0 -17   87.79   14.70
   3   0 -17   75.99   10.60
  -4   0 -17    2.50    5.20
  -4   0  17   21.30    6.10
  -4   0  17    8.00    2.80
  -4   0 -17    6.40    6.50
  -5   0 -17  102.49   14.40
  -5   0  17   94.69    9.20
  -6   0  17   74.59    8.70
  -6   0 -17   37.50   16.80
   0   1 -17   62.39    8.90
   0  -1 -17   54.99    8.40
   0  -1 -17   52.29   10.50
   0   1  17   52.69    5.20
  -1   1  17  156.68   13.20
  -1  -1 -17  147.79   16.10
   1   1 -17  127.99   18.30
  -1   1  17  159.98   13.60
   1   1  17  156.88   13.10
  -1  -1  17  161.28   13.80
   1  -1 -17  158.68   18.50
  -1   1 -17  157.68   15.80
  -2   1  17   25.40    3.20
  -2   1  17   30.10    4.00
  -2  -1 -17   22.50    6.10
   2   1 -17   21.20    9.00
   2   1 -17   18.50    5.40
   2   1  17   43.60    7.00
  -2  -1  17   23.20    4.00
   2  -1 -17   26.00    8.70
  -2   1 -17   22.00    8.10
  -2   1 -17   19.80    5.50
  -3  -1 -17  183.68   19.50
  -3   1  17  228.88   17.30
  -3  -1 -17  190.48   22.00
  -3   1  17  205.18   16.70
   3   1 -17  175.78   19.30
   3   1 -17  180.28   23.60
  -3  -1  17  193.28   16.70
   3  -1 -17  194.48   23.10
  -3   1 -17  204.18   22.50
  -3   1 -17  202.08   19.20
  -3  -1  17  214.88   17.50
   4   1 -17  170.28   20.30
   4   1 -17  198.38   36.10
  -4   1  17  241.98   18.10
  -4  -1 -17  216.88   23.10
  -4  -1 -17  201.58   20.70
  -4   1 -17  234.48   23.80
  -4   1 -17  171.78   19.60
  -4  -1  17  227.58   18.30
  -5  -1 -17    4.90    6.60
  -5   1  17   18.60    6.00
  -5   1  17    6.00    2.20
  -5  -1  17    8.00    2.70
  -5   1 -17    6.90    6.10
  -5   1 -17    7.10   13.50
  -5  -1  17   13.00    5.20
  -6  -1 -17   48.50   16.00
  -6   1 -17   50.39    5.90
  -6   1 -17   44.30   17.30
  -6  -1  17   65.09    8.10
   0   2  17  329.17   24.10
   0  -2 -17  285.87   28.00
   0   2 -17  317.27   26.80
   0  -2 -17  253.47   26.40
   0   2 -17  259.27   28.80
   1   2 -17  820.72   75.49
  -1  -2 -17  751.62   73.29
  -1  -2 -17  799.52   74.19
  -1   2  17  984.70   71.99
  -1   2  17  936.31   71.59
  -1  -2  17  933.31   72.19
  -1   2 -17  925.91   73.49
   1  -2 -17  869.71   74.89
   1   2  17  947.91   71.49
   2   2 -17  388.46   40.30
  -2   2  17  534.05   38.50
   2   2 -17  462.65   43.50
  -2   2  17  515.45   38.20
  -2  -2 -17  435.76   40.30
   2  -2 -17  461.15   42.20
  -2  -2  17  492.55   38.80
  -2   2 -17  427.76   43.20
  -2   2 -17  462.35   40.00
  -2   2 -17  497.85   46.80
  -3  -2 -17   64.19   11.10
  -3   2  17   93.99    8.70
   3   2 -17   72.09   10.70
   3   2 -17  103.79   16.60
  -3   2  17   95.59    8.10
  -3  -2 -17   91.09   14.30
  -3   2 -17  119.19   21.20
  -3   2 -17   91.59   11.20
  -3  -2  17   85.69    8.10
  -3  -2  17  104.09    9.40
  -3   2 -17   89.69   14.60
  -4  -2 -17   58.09   10.40
   4   2 -17   73.69   15.10
   4   2 -17   55.79    9.90
  -4  -2 -17   78.39   13.20
  -4   2  17   75.59    7.20
  -4  -2  17   68.99    7.90
  -4   2 -17   59.99    8.70
  -4   2 -17   82.19   13.50
  -4   2 -17   98.89   22.40
  -5  -2 -17  160.38   18.70
  -5   2  17  140.79   12.90
  -5   2 -17  181.38   30.00
  -5   2 -17  152.08   16.60
  -5  -2  17  143.79   13.50
  -6   2  17  438.36   32.40
  -6   2 -17  339.37   31.20
  -6  -2  17  365.96   32.80
   0   3 -17    7.70    8.30
   0  -3 -17   18.80    6.30
   0  -3 -17   27.30    7.50
   0   3 -17   23.00    6.20
   0   3  17   19.30    3.20
   0  -3  17   26.10    4.20
   0   3  17   32.20    5.80
   0   3  17   22.90    2.90
   1   3 -17  102.89   15.30
  -1   3  17   83.99    8.00
   1   3 -17   96.39   11.90
  -1  -3 -17   87.69   11.70
   1   3 -17   69.29   10.70
  -1  -3 -17   96.99   13.10
  -1   3  17   91.49    8.60
   1   3  17   94.69    7.90
  -1  -3  17   83.49    9.30
  -1   3 -17   92.59   11.50
   1  -3 -17  102.69   13.90
   1   3  17  121.29   12.00
   2   3 -17   58.69   12.70
  -2  -3 -17   49.10    9.20
   2   3 -17   43.50    8.30
  -2   3  17   66.39    5.80
  -2   3  17   73.49    6.50
  -2  -3  17   57.69    7.40
  -2   3 -17   49.20   11.50
   2  -3 -17   61.29   11.30
   2   3  17   89.19   10.80
  -2   3 -17   47.00    7.90
  -2   3 -17   52.19   15.10
  -3  -3 -17  100.59   14.70
   3   3 -17  103.89   13.50
   3   3 -17  126.99   19.30
  -3   3  17  127.59   10.70
  -3   3  17  133.79   11.10
  -3  -3 -17  113.79   16.30
  -3   3 -17  124.49   17.80
  -3   3 -17  153.78   26.30
  -3  -3  17  125.39   11.90
  -3   3 -17  114.69   13.00
  -4  -3 -17   86.79   12.90
  -4   3  17  107.59    9.50
  -4  -3 -17   99.49   15.00
   4   3 -17   89.79   17.70
  -4   3 -17   81.19   11.20
  -4  -3  17   94.99   10.20
  -4   3 -17  137.59   27.20
  -4   3 -17  116.19   16.20
  -5  -3 -17   50.19   10.70
  -5   3  17   46.60    5.20
  -5  -3 -17   40.00    7.90
  -5   3 -17   47.40    7.80
  -5  -3  17   52.29    6.40
  -5   3 -17   51.99   18.20
  -6   3  17  182.18   14.60
  -6  -3  17  144.49   15.20
  -6   3 -17  147.69   13.50
   0  -4 -17  799.72   67.99
   0   4  17  826.32   64.69
   0   4 -17  873.11   67.19
   0   4 -17  661.93   68.29
   0   4  17  842.12   65.09
   1   4 -17   43.00   11.20
  -1  -4 -17   28.20    7.40
  -1   4  17   20.50    3.10
  -1   4  17   26.20    3.90
   1  -4  17   40.90    5.50
  -1   4  17   45.30    6.20
  -1  -4 -17   31.10    7.90
   1   4 -17   21.70    6.30
   1   4 -17   35.00    7.60
   1   4  17   23.20    3.10
  -1  -4  17   29.10    5.20
   1   4  17   37.00    6.70
  -1   4 -17   41.10    7.00
   1  -4 -17   39.10    9.00
   2   4 -17   50.99    9.40
   2   4 -17   68.29   14.20
  -2   4  17   73.59    6.70
  -2  -4 -17   51.69    9.90
  -2   4  17   72.49    7.20
  -2   4 -17   71.09   18.20
  -2  -4  17   89.89    7.40
  -2   4 -17   63.59   13.40
  -2  -4  17   64.49    8.50
   2  -4 -17   76.69   11.80
   2   4  17   75.89   11.30
  -2   4 -17   66.09    9.50
  -3   4  17  279.17   22.00
   3   4 -17  242.48   30.10
  -3   4  17  310.57   22.50
   3   4 -17  239.88   25.20
  -3  -4 -17  227.28   25.30
  -3   4 -17  252.07   24.00
  -3   4 -17  303.17   37.10
  -3  -4  17  251.17   23.10
  -3   4 -17  262.37   28.60
  -4  -4 -17  166.98   20.20
  -4  -4 -17  160.88   18.90
  -4   4  17  167.48   14.60
   4   4 -17  167.98   24.30
  -4   4 -17  179.48   31.80
  -4  -4  17  151.18   15.50
  -4   4 -17  190.48   21.00
   5   4 -17   26.00   12.50
  -5  -4 -17   18.30    7.90
  -5   4 -17   28.70    3.90
  -5  -4  17   27.60    6.00
  -5   4 -17   16.00   15.80
  -6   4  17  101.69    8.50
  -6   4 -17   83.99    7.90
  -6  -4  17   72.59    9.50
   0   5  17   19.90    3.70
   0  -5 -17   17.80    7.20
   0   5 -17   30.10    7.30
   0   5  17   30.40    6.00
   0   5 -17   39.90   10.70
   0   5  17   23.90    3.20
   0  -5  17   36.20    4.70
  -1   5  17   23.00    3.10
  -1  -5 -17   16.10    7.00
   1   5 -17   14.10    5.80
  -1  -5 -17   33.30    8.00
   1  -5  17   32.70    4.70
  -1   5  17   16.50    3.40
   1   5 -17   34.10   11.20
  -1   5  17   34.70    5.60
   1   5 -17   20.60    7.50
  -1  -5  17   27.20    4.00
   1   5  17   29.70    6.30
   1   5  17   20.30    2.90
  -1   5 -17   27.30    6.60
   1  -5 -17   30.00    8.10
   2   5 -17  313.97   37.30
  -2  -5 -17  278.17   33.10
  -2   5  17  383.26   30.60
  -2   5  17  389.06   31.00
  -2  -5  17  353.16   31.80
  -2   5 -17  337.47   37.30
   2   5  17  443.86   34.30
   2  -5 -17  362.66   34.80
  -2   5 -17  379.46   33.00
  -2  -5  17  432.26   31.10
  -2   5 -17  337.37   42.60
  -3   5  17  719.43   53.69
  -3   5  17  777.72   54.19
   3   5 -17  578.74   56.79
   3   5 -17  643.74   60.89
  -3  -5 -17  590.24   56.39
  -3  -5  17  659.93   54.79
  -3   5 -17  704.73   68.59
  -3   5 -17  608.14   55.19
  -3   5 -17  666.73   59.99
   4   5 -17  144.49   21.50
  -4  -5 -17  127.99   18.10
  -4  -5 -17  132.49   17.00
  -4   5  17  130.19   12.10
  -4   5 -17  157.18   18.50
  -4  -5  17  125.59   13.40
  -4   5 -17  177.58   32.20
  -5   5 -17  250.97   20.00
  -5  -5  17  216.48   22.10
  -6  -5 -17  107.49   15.20
  -6  -5  17  150.28   13.20
   0   6  17 1226.78  100.39
   0  -6  17 1393.46  100.69
   0   6  17 1182.68   99.79
   0  -6 -17 1163.28  103.09
  -1   6  17  140.59   13.30
  -1  -6 -17  107.59   16.50
  -1   6  17  141.39   12.70
  -1  -6 -17  128.69   17.40
   1  -6  17  175.28   13.80
   1   6 -17  145.69   21.10
   1  -6 -17  144.89   17.80
   1   6  17  126.49   12.50
   1   6  17  166.78   16.30
  -1   6 -17  152.68   16.60
  -1  -6  17  167.68   13.50
  -2  -6 -17    5.70    6.90
  -2   6  17   10.40    2.20
   2   6 -17    5.20    4.60
  -2   6  17    9.80    2.70
  -2  -6 -17    4.50    7.10
   2   6 -17    5.20   10.30
  -2   6 -17   -0.30    8.50
  -2  -6  17    4.50    4.50
   2   6  17   11.60    5.80
   2  -6 -17   13.20    7.50
  -2   6 -17   19.40    6.30
  -2  -6  17    8.50    2.60
   3   6 -17  348.77   38.20
  -3   6  17  370.36   29.50
  -3  -6 -17  281.97   32.30
   3   6  17  438.56   33.80
  -3  -6  17  332.07   30.60
  -3   6 -17  372.46   36.60
  -3   6 -17  324.87   31.00
  -4  -6 -17   52.79   11.90
   4   6 -17   52.69   15.40
  -4   6  17   68.39    6.70
  -4  -6 -17   60.69   10.90
  -4  -6  17   54.69    8.10
   4   6  17   70.79   11.10
  -4   6 -17   63.89   12.00
  -5  -6 -17  130.69   17.60
   5   6 -17  129.59   20.10
  -6  -6 -17   44.50    8.80
  -6  -6  17   59.39    6.90
   0  -7 -17   20.30    7.30
   0   7  17   20.80    5.50
   0   7 -17   22.20   14.90
   0   7  17   14.90    3.50
   0   7  17   16.40    2.90
   0  -7  17   19.80    3.70
  -1   7  17  799.02   68.29
   1  -7  17  934.81   68.99
  -1  -7 -17  763.52   71.39
  -1   7  17  841.62   68.89
   1   7 -17  717.33   73.19
  -1   7 -17  857.01   70.99
   1   7  17  921.71   71.09
  -1  -7  17  919.91   68.89
   1  -7 -17  812.62   71.99
  -2   7  17   45.90    5.90
   2   7 -17   32.00    8.50
  -2  -7 -17   40.10   10.10
   2   7 -17   32.40   13.00
  -2  -7 -17   45.20   12.70
  -2   7 -17   51.89    8.90
  -2   7 -17   60.89   14.30
  -2  -7  17   49.90    5.90
   2  -7 -17   44.20   10.20
   2   7  17   56.19    9.50
  -3   7  17   15.30    3.40
  -3  -7 -17    7.80    7.60
   3   7 -17    8.20   11.90
   3  -7 -17    7.40    8.10
  -3   7 -17   14.20    9.70
  -3   7 -17   15.30    5.90
  -3  -7  17   14.90    5.90
   3   7  17   18.90    7.10
   4   7 -17   77.79   18.00
  -4   7 -17  114.09   15.50
   4   7  17  101.29   13.90
   5   7 -17  206.18   24.60
  -5  -7 -17  172.38   22.00
   5   7  17  237.98   20.60
   0   8  17   30.60    6.20
   0  -8 -17   15.90    7.60
   0  -8  17   22.30    4.00
   0   8  17   25.40    4.70
   1  -8  17  233.98   19.90
  -1  -8 -17  207.08   23.80
  -1   8  17  219.68   20.10
   1   8 -17  204.48   26.80
   1   8  17  253.47   22.60
   1  -8 -17  225.08   24.50
  -1  -8  17  238.38   20.00
   2   8 -17  159.98   25.10
  -2   8  17  186.48   16.20
  -2  -8 -17  139.29   20.10
  -2  -8 -17  157.48   19.60
  -2  -8  17  198.08   16.20
  -2   8 -17  170.28   19.00
   2  -8 -17  169.58   20.60
  -2   8 -17  187.18   25.00
   2   8  17  199.78   19.60
   3   8 -17   45.90   14.50
  -3   8  17   49.99    6.10
  -3  -8 -17   47.00   10.30
  -3   8 -17   37.00    7.90
   3   8  17   51.99    9.70
  -3   8 -17   51.89   12.80
   3  -8 -17   54.69   11.70
  -3  -8  17   45.90    8.70
   4   8 -17   56.49   14.70
   4   8  17   61.29   10.40
  -4   8 -17   65.39   10.60
   5   8 -17   50.99   12.60
  -5  -8 -17   52.99   10.80
   5   8  17   80.29    9.90
   0   9  17   24.90    5.60
   0  -9  17   22.20    4.10
   0  -9 -17   27.60    8.60
   0   9  17   18.80    4.40
   1   9 -17   40.20   12.40
   1  -9  17   41.50    5.60
  -1  -9 -17   49.40   10.40
  -1   9  17   36.70    5.60
   1   9  17   47.60    8.00
  -1  -9  17   41.80    5.90
   1  -9 -17   35.80    9.60
   2  -9  17  180.28   16.20
  -2  -9 -17  127.49   19.70
  -2   9  17  163.48   15.70
   2   9 -17  169.78   24.30
  -2  -9  17  190.88   15.70
   2  -9 -17  155.78   20.70
  -2   9 -17  154.28   18.60
  -2   9 -17  184.88   25.00
   2   9  17  189.68   18.60
   3   9 -17   -2.90   10.40
  -3   9 -17    6.00    9.00
   3   9  17    2.40    5.40
   3  -9 -17    1.80    7.50
   4   9 -17   52.09   14.20
  -4   9 -17   85.89   11.10
   4   9  17   55.89    9.60
   5   9 -17   50.89   11.00
   5   9  17   64.09   11.30
   0 -10  17  137.19   12.80
   0 -10 -17  127.09   17.80
  -1 -10 -17   75.79   13.00
   1 -10  17   84.49    8.90
   1  10  17   90.79   11.20
  -1 -10  17   87.19    9.00
  -1  10 -17   63.69   15.30
   1 -10 -17   87.19   14.10
   2 -10  17   40.20    5.60
   2  10 -17   39.90   12.10
  -2  10 -17   44.20   12.70
  -2 -10  17   36.80    5.60
   2  10  17   38.70    7.40
   2 -10 -17   28.60    9.60
   3  10 -17  107.39   17.30
   3 -10 -17   91.99   15.00
  -3  10 -17  126.19   17.30
   3  10  17   97.19   12.50
   4  10 -17    8.20    8.60
   4  10  17    1.10    4.00
   0 -11  17    5.60    3.00
   0 -11 -17    3.40    6.60
   1 -11  17   75.49    7.80
  -1 -11 -17   62.69   11.60
   1  11  17   72.09    9.10
  -1 -11  17   65.09    7.70
   1 -11 -17   59.09   11.50
   2 -11  17   57.19    6.80
  -2  11 -17   66.39   13.90
  -2 -11  17   54.29    6.50
   2 -11 -17   51.99   11.30
   2  11  17   51.89    8.00
   3  11 -17   75.29   13.50
  -3  11 -17  130.19   15.40
   3 -11 -17   93.29   14.10
   3  11  17   87.29   11.10
   0 -12  17    1.10    2.50
   0 -12 -17    1.50    6.70
   1 -12  17  139.79   12.50
  -1 -12 -17  117.79   16.00
  -1 -12  17  140.49   12.40
   1 -12 -17  112.49   16.50
   2 -12  17  203.68   16.20
   2  12  17  183.58   16.60
  -2 -12  17  164.88   16.30
   2 -12 -17  153.68   19.30
   0 -13 -17    0.90    5.70
   0 -13  17    0.60    2.30
   1 -13  17   12.30    3.30
   1 -13 -17   13.80    6.50
  -1 -13  17    8.00    3.00
   0   0  18   30.60    5.50
   0   0 -18   19.10    6.30
   0   0 -18   25.70    8.60
  -1   0 -18   16.30    5.50
   1   0  18   28.10    5.30
  -1   0  18   17.60    3.30
   1   0 -18   18.70    7.90
  -1   0 -18   18.00    8.10
  -2   0  18   52.79    5.60
   2   0 -18   58.09   11.30
  -2   0  18   55.89    6.30
  -2   0 -18   43.50    8.10
   2   0  18   81.89    9.70
   3   0 -18   48.20    8.70
  -3   0  18   66.99    6.20
   3   0 -18   60.19   13.00
  -3   0 -18   74.99    9.80
  -3   0  18   71.29    7.00
  -3   0 -18   69.49   12.40
  -4   0 -18  267.97   28.80
  -4   0  18  346.97   27.10
  -4   0 -18  342.07   32.60
  -5   0  18   36.10    4.60
  -5   0 -18   28.40    8.30
  -6   0  18    2.60    3.20
  -6   0 -18    3.70   11.60
   0  -1 -18  615.44   55.49
   0   1 -18  605.34   57.19
   0   1  18  720.43   53.59
   0  -1 -18  702.33   57.39
   0   1 -18  659.83   55.59
  -1   1  18   77.39    7.50
   1   1 -18   64.89   12.60
  -1   1  18   94.49    8.30
  -1  -1 -18   64.79   10.10
  -1  -1 -18   81.79   12.40
  -1   1 -18   86.59   11.10
   1  -1 -18   81.89   13.10
  -1  -1  18   88.49    8.40
   1   1  18   86.39    7.40
   2   1 -18   45.30   10.90
  -2   1  18   39.20    4.50
   2   1 -18   34.40    7.50
  -2   1  18   41.00    5.20
  -2  -1 -18   41.30    8.10
   2  -1 -18   46.70   10.20
  -2  -1  18   44.70    5.60
  -2   1 -18   45.90   10.90
  -2   1 -18   41.00    7.30
   2   1  18   69.09    9.00
  -3  -1 -18   19.60    7.80
   3   1 -18   15.20    5.50
  -3   1  18   23.70    3.70
  -3  -1 -18   23.10    6.70
   3   1 -18   33.60   11.00
  -3   1  18   22.30    2.90
  -3   1 -18   14.50    5.70
  -3   1 -18   18.50    8.20
   3  -1 -18   34.60   10.30
  -3  -1  18   20.80    2.90
  -3  -1  18   20.80    3.80
  -4   1  18   68.79    6.90
  -4  -1 -18   65.29    9.90
   4   1 -18   49.10    9.50
  -4  -1 -18   59.49   11.70
   4   1 -18   72.99   18.30
  -4  -1  18   65.39    7.20
  -4   1 -18   61.09    9.10
  -4   1 -18   78.49   13.10
  -5  -1 -18   18.40    7.70
  -5   1  18   21.00    3.20
  -5   1 -18   18.90    7.30
  -5  -1  18   20.70    3.50
  -5   1 -18   25.10   16.20
  -6  -1 -18   18.60   13.60
  -6   1  18   28.70    5.00
  -6   1 -18    6.00   12.30
  -6   1 -18   17.90    3.30
  -6  -1  18   22.80    5.00
   0   2 -18  376.26   31.40
   0  -2 -18  314.77   31.10
   0   2  18  369.76   28.60
   0   2 -18  329.97   33.30
   0  -2 -18  351.06   32.90
  -1  -2 -18   12.70    7.10
  -1  -2 -18   11.80    6.00
  -1   2  18   12.60    2.30
  -1   2  18    9.10    2.50
   1   2 -18   14.50    8.60
   1  -2  18   20.80    4.60
  -1   2  18   19.40    4.60
   1   2 -18   16.70    6.00
  -1   2 -18    9.30    5.10
   1  -2 -18   10.40    7.10
  -1  -2  18   15.60    3.40
   1   2  18   20.60    5.40
   1   2  18    9.30    1.80
  -1  -2  18    9.40    3.00
  -2   2  18  117.19   10.40
  -2  -2 -18  112.79   13.80
  -2   2  18  121.29    9.90
   2   2 -18  110.39   17.20
   2   2 -18   92.89   12.50
  -2  -2  18  114.49   10.80
   2  -2 -18  111.29   16.40
  -2   2 -18  119.29   13.10
  -2   2 -18   99.09   16.60
  -2   2 -18  125.99   21.10
  -3   2  18   44.30    5.00
   3   2 -18   49.99   12.90
  -3   2  18   49.10    5.70
  -3  -2 -18   45.90    9.00
  -3  -2 -18   51.09   10.90
   3   2 -18   42.30    8.10
  -3  -2  18   52.59    6.40
   3  -2 -18   53.59   12.00
  -3  -2  18   38.60    4.90
  -3   2 -18   59.89    8.40
  -3   2 -18   53.09   11.80
  -3   2 -18   64.79   17.20
   4   2 -18  115.39   19.30
  -4   2  18  132.19   11.50
  -4  -2 -18  113.59   15.40
  -4  -2 -18  137.19   17.60
  -4  -2  18  115.39   11.80
  -4   2 -18  131.59   18.20
  -4   2 -18  112.49   13.50
  -4   2 -18  159.38   28.10
  -5  -2 -18   24.10    8.30
  -5   2  18   18.40    3.10
  -5   2 -18   23.30    6.90
  -5   2 -18   34.40   17.20
  -5  -2  18   21.70    3.90
  -6  -2 -18    7.70   11.80
  -6   2  18   20.80    4.10
  -6   2 -18   14.10    2.90
  -6  -2  18   18.60    4.60
  -6   2 -18   20.60   15.00
   0   3  18  221.78   18.60
   0  -3 -18  195.68   21.80
   0  -3 -18  238.48   23.30
   0   3 -18  243.58   22.00
   0   3 -18  207.38   24.60
   0   3  18  232.38   19.10
   1   3 -18  302.07   32.00
  -1  -3 -18  304.57   30.10
  -1  -3 -18  242.98   28.70
  -1   3  18  341.07   26.60
  -1   3  18  314.27   26.10
   1   3 -18  324.87   29.40
   1   3  18  346.47   26.10
  -1   3 -18  338.17   28.80
   1  -3 -18  308.77   30.60
  -1  -3  18  328.37   27.10
  -2   3  18   37.70    4.60
   2   3 -18   21.10    6.10
  -2  -3 -18   25.60    7.40
   2   3 -18   33.30   11.20
  -2   3  18   34.70    3.90
   2  -3 -18   37.10    9.50
   2   3  18   48.10    7.90
  -2   3 -18   36.10   17.80
  -2  -3  18   32.10    5.30
  -2   3 -18   22.60    9.60
  -2   3 -18   24.20    6.30
  -3   3  18  102.59    8.70
  -3  -3 -18   96.79   14.90
  -3   3  18  113.79    9.30
   3   3 -18  100.39   17.40
   3   3 -18   76.19   11.60
  -3  -3 -18   77.69   12.60
   3  -3 -18   84.89   15.00
  -3   3 -18   94.99   16.10
  -3   3 -18   93.19   21.80
  -3  -3  18   94.49   10.00
  -3   3 -18   97.19   11.80
   4   3 -18  169.98   24.40
  -4  -3 -18  177.68   19.60
  -4  -3 -18  182.68   21.60
  -4   3  18  187.18   15.70
  -4   3 -18  233.48   33.20
  -4   3 -18  145.19   17.00
  -4  -3  18  178.88   16.30
  -4   3 -18  203.68   22.30
  -5  -3 -18   15.30    7.60
   5   3 -18   26.90   12.20
  -5   3 -18   17.10    5.90
  -5   3 -18   17.50   15.40
  -5  -3  18   35.50    6.80
  -6   3  18  134.69   10.80
  -6  -3  18  100.99   11.50
  -6   3 -18  102.09    9.60
  -6   3 -18   58.49   19.70
   0   4 -18    8.30    8.80
   0  -4 -18    8.00    6.10
   0   4  18    3.60    1.50
   0   4 -18   13.20    5.70
   0   4  18    8.30    4.40
   0  -4  18    9.80    3.00
   0  -4 -18   11.40    6.30
   0   4  18    5.30    2.10
  -1  -4 -18   32.40    8.00
   1  -4  18   43.60    5.70
   1   4 -18   41.40    7.90
  -1  -4 -18   25.00    8.10
  -1   4  18   30.30    4.20
   1   4 -18   37.40   11.40
  -1   4  18   20.00    3.20
   1   4 -18   22.70    6.50
  -1  -4  18   39.50    4.80
   1   4  18   42.60    7.40
  -1   4 -18   31.40    6.80
   1  -4 -18   31.20    8.30
   1   4  18   22.20    3.20
  -2  -4 -18  152.38   18.80
  -2   4  18  192.98   15.80
   2   4 -18  150.98   23.60
  -2   4  18  191.88   15.40
  -2  -4  18  179.38   16.70
   2  -4 -18  181.48   20.60
  -2   4 -18  170.78   23.10
  -2   4 -18  185.88   18.30
  -3   4  18    9.60    2.30
   3   4 -18   12.90   10.90
  -3  -4 -18   14.30    7.50
   3   4 -18   13.70    5.80
  -3   4  18   11.70    2.80
  -3   4 -18    6.90    5.10
   3  -4 -18   11.60    8.60
  -3  -4  18   13.30    4.20
   3   4  18   21.80    7.10
  -3   4 -18    8.40    8.20
  -3   4 -18   20.50   14.70
   4   4 -18  152.98   22.40
  -4   4  18  165.48   13.60
  -4  -4 -18  146.89   18.00
  -4  -4 -18  139.19   19.30
  -4  -4  18  138.09   14.30
  -4   4 -18  162.58   19.90
  -4   4 -18  161.98   30.30
  -5   4 -18  124.29   28.70
  -5  -4  18  194.48   18.10
  -6   4  18   88.09    7.60
  -6   4 -18   70.99    7.00
  -6   4 -18   46.50   19.10
  -6  -4  18   67.99    8.70
   0   5 -18   22.60    6.80
   0   5 -18   24.30    9.90
   0   5  18   29.60    5.90
   0  -5  18   22.20    3.90
   0   5  18   16.30    3.20
   0  -5 -18   20.40    7.70
   0   5  18   18.60    2.80
  -1   5  18  241.38   19.50
  -1   5  18  240.48   20.00
   1   5 -18  219.48   23.00
   1   5 -18  212.68   27.10
  -1  -5 -18  214.78   23.70
   1  -5 -18  223.88   24.20
   1   5  18  272.57   22.80
  -1   5 -18  229.88   22.60
   1   5  18  223.18   19.30
  -2  -5 -18   15.70    7.40
  -2   5  18   36.80    4.80
   2   5 -18   28.70    7.60
  -2   5  18   32.10    4.00
   2   5 -18   28.20   12.10
  -2  -5  18   43.10    4.80
   2   5  18   37.40    7.70
  -2   5 -18   27.90   11.30
  -2  -5  18   30.80    5.80
   2  -5 -18   33.70    9.30
  -2   5 -18   29.00    7.10
  -3  -5 -18  180.28   22.40
   3   5 -18  223.88   28.20
  -3   5  18  253.27   19.20
  -3   5 -18  235.38   26.60
  -3  -5  18  199.58   19.90
  -3   5 -18  202.28   20.90
  -3   5 -18  247.98   35.40
   3  -5 -18  217.48   24.50
  -4   5  18   53.09    6.10
   4   5 -18   51.59   14.90
  -4  -5 -18   55.89   10.30
  -4  -5 -18   48.00   11.50
  -4  -5  18   54.49    7.60
   4   5  18   82.49   11.90
  -4   5 -18   57.09   11.80
  -4   5 -18   46.00   19.70
  -5  -5 -18   22.50    8.50
   5   5 -18   15.40   11.30
  -5   5 -18   25.90   17.40
  -6  -5  18   98.49   11.40
  -6   5 -18  128.59   10.00
   0   6 -18   22.30    7.40
   0   6  18   23.70    3.30
   0  -6  18   25.20    4.10
   0   6 -18   23.40   10.00
   0   6  18   26.20    5.80
   0  -6 -18   22.20    8.00
   0   6  18   18.90    3.70
  -1   6  18   32.20    4.10
  -1  -6 -18   13.50    7.90
  -1  -6 -18   30.40    8.30
   1  -6  18   36.50    5.30
  -1   6  18   44.50    6.40
   1   6 -18   22.60   11.60
   1   6 -18   29.00    8.40
  -1   6  18   28.70    4.60
  -1   6 -18   39.20    8.30
   1   6  18   33.80    7.10
  -1  -6  18   36.90    5.00
   1  -6 -18   35.30    9.30
   2   6 -18  261.67   32.60
  -2   6  18  303.47   24.50
  -2   6  18  295.67   24.00
  -2  -6 -18  213.18   27.40
   2   6  18  356.36   28.10
   2  -6 -18  268.77   28.80
  -2  -6  18  273.77   27.70
  -2   6 -18  270.37   26.60
  -2   6 -18  311.57   33.10
  -3   6  18   42.80    5.80
  -3  -6 -18   41.90   10.00
   3   6 -18   51.29   15.20
   3   6  18   51.29    9.50
  -3  -6  18   46.30    7.90
  -3   6 -18   57.39   13.40
  -3   6 -18   46.40    8.00
   3  -6 -18   51.69   11.70
  -4   6  18   58.29    6.10
   4   6 -18   57.59   15.90
  -4  -6 -18   48.80   11.60
  -4  -6 -18   55.19   10.50
  -4  -6  18   41.10    7.20
  -4   6 -18   65.19   12.00
   4   6  18   65.79   10.40
  -5  -6 -18   26.00    8.50
   5   6 -18   16.40   10.40
  -6  -6 -18   -2.70    4.80
   0  -7 -18  264.87   28.40
   0   7  18  343.67   26.50
   0   7  18  263.07   24.30
   0   7 -18  271.17   27.70
   0   7  18  259.07   23.60
   0  -7  18  306.47   24.50
  -1   7  18   19.60    3.90
   1   7 -18   16.90   11.40
  -1  -7 -18   15.00    7.70
   1  -7  18   25.10    4.10
   1   7 -18   15.20    7.70
  -1   7  18   23.30    4.50
  -1  -7 -18   15.10   15.10
   1   7  18   18.60    6.40
  -1   7 -18   23.30    7.50
  -1  -7  18   24.20    4.10
   1  -7 -18   21.20    8.20
  -2  -7 -18   31.10    9.60
   2   7 -18   39.00   13.70
  -2   7  18   48.70    6.10
   2  -7 -18   44.30   10.40
  -2   7 -18   39.60    8.60
  -2   7 -18   39.60   13.20
  -2  -7  18   50.79    6.10
   2   7  18   54.19    9.20
  -3   7  18  535.35   38.00
   3   7 -18  506.35   46.50
  -3  -7 -18  383.36   40.40
  -3  -7  18  401.46   38.70
   3  -7 -18  429.16   42.00
  -3   7 -18  531.55   45.40
  -3   7 -18  415.16   39.20
   4   7 -18   13.80   11.40
   4   7  18   10.60    5.90
  -4   7 -18   13.60    7.30
   5   7 -18   28.50   10.90
  -5  -7 -18   32.10    9.00
   5   7  18   36.90    7.10
   0  -8 -18   79.39   13.80
   0   8  18   96.89   11.20
   0   8  18   85.29    9.70
   0   8 -18   90.69   13.60
   0  -8  18   94.09    9.30
  -1   8  18   39.60    5.70
   1   8 -18   18.10   11.50
   1  -8  18   33.90    5.10
  -1  -8 -18   33.80    9.20
   1   8 -18   15.70    8.70
  -1  -8  18   35.40    5.30
   1   8  18   36.30    7.40
   1  -8 -18   36.20    9.90
  -1   8 -18   41.80    9.10
   2   8 -18  169.78   25.90
  -2   8  18  214.18   18.30
  -2   8 -18  193.68   26.70
   2   8  18  230.18   21.30
  -2   8 -18  185.68   20.90
   2  -8 -18  168.48   22.60
  -2  -8  18  225.38   18.20
  -3   8  18    3.00    4.00
   3   8 -18    3.80   10.80
  -3  -8 -18    4.00   12.30
   3   8  18    4.20    5.70
  -3   8 -18    8.70    9.40
   3  -8 -18   -0.10    7.30
   4   8 -18    8.70   10.20
   4   8  18   14.70    5.90
  -4   8 -18   15.10    6.50
  -5  -8 -18   61.79   11.70
   5   8 -18   59.89   13.00
   5   8  18   95.89   10.50
   0   9  18    1.90    3.80
   0  -9 -18   -0.30    6.70
   0   9 -18   -5.30    7.50
   0  -9  18    5.00    2.70
  -1   9  18  280.27   25.30
   1   9 -18  294.67   31.50
  -1  -9 -18  258.27   28.70
   1  -9  18  302.57   25.10
   1   9  18  312.97   27.00
  -1  -9  18  326.67   25.30
   1  -9 -18  280.97   29.60
  -1   9 -18  249.97   28.10
   2  -9  18  277.87   23.20
  -2   9  18  275.37   23.40
   2   9 -18  255.17   30.60
   2   9  18  286.07   25.60
   2  -9 -18  232.28   27.50
  -2   9 -18  286.87   32.20
  -2   9 -18  211.78   26.00
  -2  -9  18  292.67   23.30
   3   9 -18   27.50   12.20
   3   9  18   31.30    7.20
   3  -9 -18   27.30    9.50
  -3   9 -18   42.70   11.40
   4   9 -18   20.60   10.90
   4   9  18   38.10    7.40
  -4   9 -18   50.69    7.90
   0 -10 -18  105.09   16.50
   0 -10  18  123.09   11.50
  -1 -10 -18   69.99   12.50
   1 -10  18   77.29    8.40
   1 -10 -18   75.79   13.30
   1  10  18   82.59   10.30
  -1 -10  18   83.39    8.50
   2  10 -18  120.19   17.00
   2 -10  18  103.19   10.30
   2  10  18   98.49   12.40
   2 -10 -18   93.49   15.10
  -2 -10  18  107.29   10.30
  -2  10 -18  108.89   18.30
   3  10 -18  189.18   23.90
  -3  10 -18  250.57   24.00
   3 -10 -18  172.98   22.00
   3  10  18  192.88   19.50
   4  10 -18   11.60    8.30
   4  10  18    7.90    4.40
   0 -11 -18   65.79   11.90
   0 -11  18   64.89    7.50
   1 -11  18   34.20    5.00
  -1 -11 -18   31.90    8.90
   1  11  18   32.00    5.80
  -1 -11  18   33.40    5.00
   1 -11 -18   26.90    9.10
   2 -11  18   81.09    8.50
   2 -11 -18   63.89   12.60
   2  11  18   86.29   10.10
  -2  11 -18  101.09   16.10
  -2 -11  18   77.99    8.30
   3  11 -18  136.09   16.80
   3  11  18  139.79   13.70
   3 -11 -18  116.59   16.90
   0 -12 -18   19.10    7.40
   0 -12  18   19.70    4.00
   1 -12  18   13.20    3.30
  -1 -12 -18    3.90    6.80
   1 -12 -18   11.60    7.10
  -1 -12  18   13.40    3.20
   2 -12  18    9.40    3.50
   2 -12 -18   14.50    6.90
  -2  12 -18   18.10    8.70
   2  12  18    8.90    3.90
   0 -13  18   15.70    3.70
   0   0 -19   -0.40    4.70
   0   0 -19   -4.40    6.90
   0   0  19    4.40    3.40
  -1   0 -19  273.27   29.70
  -1   0  19  318.97   26.10
  -1   0  19  348.77   26.60
  -1   0 -19  313.87   28.70
   1   0 -19  312.07   31.20
  -2   0 -19   32.40   14.10
  -2   0  19   46.50    4.90
   2   0 -19   37.40   10.50
  -2   0  19   42.30    5.60
   2   0  19   72.39    8.80
  -2   0 -19   37.80    7.60
  -3   0 -19   55.39    9.50
  -3   0  19   72.99    6.80
  -3   0 -19   64.49   12.90
  -3   0  19   77.39    7.60
   3   0 -19   70.29   14.60
  -4   0 -19  177.78   22.30
  -4   0  19  215.38   16.80
  -4   0 -19  155.68   19.10
  -5   0 -19  490.65   47.70
  -5   0 -19  620.24   58.39
  -6   0  19  339.87   29.50
   0   1 -19  923.51   77.09
   0   1  19  938.11   72.99
   0   1 -19  934.01   75.19
   0  -1 -19  830.22   74.99
   0  -1 -19  908.01   76.69
  -1  -1 -19  367.76   36.60
  -1   1  19  409.06   32.90
   1   1 -19  397.16   38.10
  -1   1  19  449.36   33.40
  -1  -1 -19  373.66   35.30
   1  -1 -19  397.86   37.50
  -1  -1  19  433.36   33.50
   1   1  19  415.06   32.80
  -1   1 -19  406.16   35.40
  -1   1 -19  299.17   41.10
  -2  -1 -19   91.19   13.30
  -2   1  19  121.29   10.50
   2   1 -19  102.89   16.30
  -2   1  19  121.19   10.00
  -2   1 -19  106.09   13.40
  -2   1 -19   95.59   16.70
  -2  -1  19  115.29   10.00
   2  -1 -19   96.29   15.60
  -2  -1  19  117.09   10.70
   3   1 -19   72.79   14.60
  -3  -1 -19   77.89   11.40
  -3   1  19   97.19    8.70
  -3  -1 -19   92.99   15.10
   3   1 -19   68.19   10.80
  -3   1  19   93.89    8.00
  -3  -1  19   89.69    7.90
  -3   1 -19   60.69   10.50
   3  -1 -19   98.79   15.40
  -3   1 -19   98.99   15.80
  -3  -1  19   92.19    8.90
  -4   1  19   74.79    7.60
  -4  -1 -19   69.29   10.50
   4   1 -19   68.79   15.40
  -4  -1 -19   76.89   13.50
  -4  -1  19   72.69    7.80
  -4   1 -19   56.89    9.50
  -4   1 -19   72.29   13.60
  -4   1 -19  105.19   22.50
  -5  -1 -19   64.69   12.40
  -5   1 -19   71.09   11.80
  -5   1 -19   92.39   22.80
  -6  -1 -19   14.90   13.30
  -6   1  19   28.50    5.10
  -6   1 -19   12.70   13.00
  -6  -1  19   29.80    5.50
   0  -2 -19    1.70    5.20
   0   2 -19    7.60    8.20
   0  -2  19   14.20    3.90
   0  -2 -19   10.40    7.30
   0   2 -19    7.10    5.00
   0   2  19    4.30    1.50
   0   2  19   19.70    4.90
  -1  -2 -19  169.68   20.00
   1   2 -19  162.98   18.50
  -1   2  19  191.98   15.70
  -1   2  19  182.98   15.10
  -1  -2 -19  127.19   18.30
   1   2 -19  153.98   21.30
  -1   2 -19  170.88   18.10
  -1  -2  19  202.98   16.10
   1  -2 -19  170.38   20.70
   1   2  19  196.68   15.10
   2   2 -19   54.99   12.60
  -2  -2 -19   54.49    9.30
  -2   2  19   58.69    5.50
  -2   2  19   59.59    6.10
   2   2 -19   41.30    8.30
  -2   2 -19   55.19    8.90
  -2   2 -19   52.99   12.50
   2  -2 -19   52.99   11.20
  -2  -2  19   56.09    6.70
  -3   2  19   37.00    4.30
   3   2 -19   31.50    7.60
  -3  -2 -19   36.90    9.80
  -3   2  19   41.00    5.20
  -3  -2 -19   32.40    8.10
   3   2 -19   29.00   11.70
  -3   2 -19   39.50   10.50
  -3  -2  19   39.10    5.20
  -3   2 -19   31.50    6.90
  -3   2 -19   48.80   16.70
  -3  -2  19   35.70    4.30
   3  -2 -19   41.20   11.10
   4   2 -19   50.49   13.80
  -4  -2 -19   28.90    8.10
  -4   2  19   47.80    5.40
  -4  -2 -19   39.70   10.50
  -4   2 -19   28.10    6.80
  -4  -2  19   39.60    5.50
  -4   2 -19   43.70   17.10
  -4   2 -19   42.90   10.90
  -5  -2  19  476.55   41.70
  -6   2  19    9.20    3.30
  -6  -2 -19    7.20   10.80
  -6   2 -19    4.00   12.50
  -6  -2  19    6.70    3.60
  -6   2 -19    7.30    2.30
   0   3 -19   17.80    9.60
   0   3  19   13.00    2.90
   0   3 -19   20.00    6.30
   0  -3  19   19.80    4.10
   0  -3 -19   12.90    7.70
   0   3  19   20.50    5.50
   0  -3 -19    6.70    5.80
  -1  -3 -19  221.48   25.60
   1   3 -19  280.47   29.20
   1   3 -19  283.57   26.00
  -1   3  19  270.87   22.60
  -1   3  19  289.77   23.10
  -1  -3 -19  257.37   26.90
  -1   3 -19  291.37   25.60
   1  -3 -19  282.17   27.80
  -1  -3  19  278.47   25.80
   1   3  19  273.97   22.50
  -2   3  19  159.78   13.80
  -2   3  19  163.38   13.40
   2   3 -19  150.38   21.40
  -2  -3 -19  143.49   17.50
  -2   3 -19  162.18   16.50
  -2  -3  19  155.48   14.40
  -2   3 -19  140.49   21.10
   2  -3 -19  145.69   19.20
  -3   3  19  532.05   39.90
  -3  -3 -19  472.85   42.80
  -3   3  19  562.44   40.30
   3   3 -19  497.75   47.20
   3   3 -19  403.56   42.70
   3  -3 -19  485.45   45.30
  -3   3 -19  616.54   54.49
  -3  -3  19  497.05   40.60
  -3  -3  19  400.06   39.70
  -3   3 -19  532.25   47.10
  -3   3 -19  459.85   41.80
  -4  -3 -19   27.60    8.30
  -4  -3 -19   29.50    9.40
  -4   3  19   31.30    4.20
   4   3 -19   22.60   11.70
  -4  -3  19   23.00    4.60
  -4   3 -19   19.60    5.70
  -4   3 -19   27.30   16.50
  -4   3 -19   23.50    9.60
   5   3 -19  112.99   18.70
  -5  -3 -19  106.59   16.20
  -5   3 -19   99.49   12.80
  -5   3 -19  136.79   27.70
  -6  -3 -19    2.60    4.10
  -6   3 -19    2.40   12.50
  -6  -3  19    3.90    3.30
  -6   3 -19    3.80    1.80
   0   4 -19  658.63   61.19
   0   4  19  719.43   57.09
   0   4  19  688.83   56.59
   0   4 -19  735.13   59.39
   0  -4 -19  702.03   60.59
   1   4 -19  184.48   24.80
  -1  -4 -19  163.28   21.10
   1   4 -19  210.38   21.80
  -1   4  19  224.08   17.80
  -1  -4 -19  207.28   22.60
  -1   4  19  230.28   18.30
  -1   4 -19  222.78   21.00
   1  -4 -19  224.78   23.40
   1   4  19  204.88   17.50
  -2   4  19   35.10    4.10
  -2  -4 -19   20.60    7.30
   2   4 -19   22.30    6.60
  -2   4  19   31.80    4.60
   2   4 -19   32.60   12.10
  -2   4 -19   19.50   10.20
   2   4  19   42.30    7.90
  -2   4 -19   30.10    7.20
   2  -4 -19   22.90    8.80
  -2  -4  19   34.50    5.90
  -2  -4  19   43.90    4.90
  -3   4  19  392.16   28.80
  -3  -4 -19  309.67   31.70
   3   4 -19  278.57   31.50
   3   4 -19  342.27   36.40
  -3  -4  19  341.97   29.30
  -3   4 -19  421.16   44.50
  -3   4 -19  331.57   30.50
  -3   4 -19  356.06   35.70
   3  -4 -19  360.26   34.50
  -4   4  19   59.99    6.40
   4   4 -19   40.10   13.90
  -4  -4 -19   61.49   10.70
  -4  -4 -19   52.29   11.80
  -4  -4  19   54.49    7.30
  -4   4 -19   69.69   13.00
  -4   4 -19   66.29   21.60
   5   4 -19   39.60   13.40
  -5  -4 -19   37.20   10.00
  -5  -4  19   60.29    8.70
  -5   4 -19   27.20   17.30
  -6   4  19  171.88   13.20
  -6  -4  19  133.19   14.30
  -6   4 -19  144.39   12.90
   0   5  19    6.50    2.00
   0   5  19    4.70    2.40
   0  -5 -19    8.10    6.70
   0   5 -19   12.60    9.60
   0   5 -19    5.90    5.80
   0   5  19    7.90    4.60
   0  -5  19   11.40    3.10
   1   5 -19   48.30   13.70
  -1  -5 -19   49.99   10.80
  -1   5  19   77.89    6.90
  -1  -5 -19   53.69   11.20
  -1   5  19   74.19    7.60
   1   5 -19   68.69   11.10
  -1  -5  19   85.09    7.90
   1   5  19   97.29   11.40
   1   5  19   63.79    6.60
  -1   5 -19   69.29   10.70
   1  -5 -19   76.49   12.80
  -2   5  19   77.59    7.20
   2   5 -19   57.59   10.60
  -2  -5 -19   58.49   10.80
   2   5 -19   83.09   16.10
  -2   5  19   83.79    7.80
  -2  -5  19   79.69    9.20
  -2   5 -19   74.39   11.00
  -2   5 -19   67.29   14.90
   2  -5 -19   73.09   13.10
   3   5 -19   55.39   15.20
  -3   5  19   60.69    6.80
  -3  -5 -19   48.00   10.70
   3   5  19   91.59   12.40
   3  -5 -19   65.49   12.80
  -3   5 -19   60.79   19.90
  -3   5 -19   65.19   14.50
  -3  -5  19   61.39    8.30
  -3   5 -19   52.89    9.10
  -4  -5 -19    0.20    7.00
   4   5 -19   -0.70   10.60
  -4  -5 -19    2.20    6.70
  -4   5  19    3.00    2.10
  -4   5 -19    5.00   15.10
   4   5  19    5.20    5.70
  -4  -5  19   -0.30    3.50
  -4   5 -19    0.20    7.30
   5   5 -19   58.39   14.10
  -5  -5 -19   58.49   11.60
  -6  -5 -19   38.40    7.90
  -6  -5  19   58.19    6.80
   0   6  19    5.10    4.20
   0   6  19    4.30    1.90
   0   6 -19   13.70    9.60
   0  -6 -19    7.40    6.80
   0   6  19    2.90    2.70
   0   6 -19   -0.80    5.90
   0  -6  19    4.30    2.40
   1   6 -19  243.98   27.20
  -1   6  19  283.47   24.10
  -1  -6 -19  251.67   27.50
   1   6 -19  226.18   30.60
  -1   6  19  264.47   23.40
  -1  -6  19  335.27   24.40
  -1   6 -19  271.17   26.80
   1  -6 -19  256.57   28.40
   1   6  19  351.96   27.10
  -2   6  19   25.80    4.20
   2   6 -19   35.30   13.10
  -2  -6 -19   11.40    8.30
  -2   6 -19   37.30   12.70
   2   6  19   36.40    7.80
  -2   6 -19   32.00    7.30
  -2  -6  19   32.40    4.80
   2  -6 -19   24.60    8.70
   3   6 -19   23.30   13.30
  -3   6  19   22.00    3.80
  -3  -6 -19   15.10    8.00
   3  -6 -19   25.80    9.90
   3   6  19   25.50    7.60
  -3  -6  19   27.00    6.00
  -3   6 -19   24.00   10.70
  -3   6 -19   25.40    6.50
   4   6 -19   42.80   14.30
  -4  -6 -19   37.50   10.70
  -4   6 -19   45.60   10.60
   4   6  19   52.99    9.40
  -5  -6 -19   34.40    9.40
   5   6 -19   41.30   12.50
   0  -7 -19  309.17   34.20
   0   7  19  421.96   32.50
   0   7 -19  301.77   33.20
   0  -7  19  385.36   30.70
  -1   7  19   16.50    3.70
   1   7 -19    9.70    7.40
  -1  -7 -19   14.50    7.60
   1   7 -19    2.80   10.10
   1  -7  19   12.20    3.20
  -1   7 -19    6.80    6.50
  -1  -7  19   14.00    3.30
   1   7  19   10.70    5.50
   1  -7 -19    3.50    7.60
  -2  -7 -19  138.69   21.40
   2   7 -19  190.78   26.60
  -2   7  19  197.88   17.90
  -2   7 -19  201.98   27.20
   2   7  19  249.58   21.60
  -2   7 -19  175.88   20.40
  -2  -7  19  236.88   18.10
   2  -7 -19  181.98   22.80
   3   7 -19   21.20   13.10
  -3   7  19   34.50    4.80
  -3  -7 -19   19.10    8.30
  -3   7 -19   27.80   11.60
   3   7  19   39.50    8.10
   3  -7 -19   33.30   10.10
  -3   7 -19   21.90    6.50
  -3  -7  19   26.30    6.20
   4   7 -19   10.50   10.90
   4   7  19   21.00    6.40
  -4   7 -19   11.50    7.40
  -5   7  19   14.70    4.40
   5   7 -19    4.50    8.80
  -5  -7 -19    2.80    6.40
   5   7  19    8.90    4.90
   0  -8 -19   -0.50    6.90
   0  -8  19    4.20    2.60
   0   8  19    3.40    4.10
   0   8 -19    4.70    7.20
  -1  -8 -19  410.56   42.10
  -1   8  19  468.95   39.20
   1  -8  19  512.05   39.20
   1   8 -19  371.06   43.50
   1   8 -19  374.36   44.10
   1  -8 -19  439.66   43.20
  -1  -8  19  536.05   39.20
   1   8  19  560.74   41.50
  -1   8 -19  450.25   41.70
   2  -8  19   76.39    7.80
   2   8 -19   56.69   15.00
  -2  -8 -19   41.70   10.90
  -2   8  19   71.39    7.80
  -2  -8  19   76.99    7.70
   2   8  19   68.09   10.50
  -2   8 -19   52.09   10.30
   2  -8 -19   61.89   12.60
  -2   8 -19   75.29   16.40
   3   8 -19  168.58   25.50
   3   8  19  228.48   21.10
  -3   8 -19  243.58   26.10
   3  -8 -19  163.38   22.70
   4   8 -19   91.09   17.90
   4   8  19  144.09   15.30
  -4   8 -19  152.68   16.20
   5   8 -19   57.79   12.00
  -5  -8 -19   49.70   14.80
   5   8  19   89.19   12.60
   0   9 -19   27.40    9.40
   0  -9 -19   19.00    8.70
   0  -9  19   32.90    5.00
   0   9  19   36.80    6.30
   1  -9  19   53.89    6.60
  -1   9  19   38.70    6.30
  -1  -9 -19   57.99   11.20
  -1  -9  19   55.39    6.70
   1  -9 -19   50.19   11.40
  -1   9 -19   63.39   10.90
   1   9  19   67.89    9.40
   2   9 -19   45.80   13.40
   2  -9  19   44.90    6.00
  -2   9 -19   44.80   13.80
  -2  -9  19   54.29    6.30
   2   9  19   49.20    8.60
   2  -9 -19   41.10   10.60
   3   9 -19   34.70   12.40
  -3   9 -19   43.70   11.60
   3   9  19   32.40    7.30
   3  -9 -19   42.10   10.40
   4   9 -19   89.69   15.60
   4   9  19   90.29   11.90
  -4   9 -19  119.29   12.60
   0 -10 -19  296.77   32.40
   0 -10  19  365.96   28.90
  -1 -10 -19   91.99   14.60
   1 -10  19  113.39   10.80
   1  10  19  115.79   12.30
   1 -10 -19  100.39   15.80
  -1 -10  19  116.09   10.80
   2 -10  19   48.30    6.10
   2  10 -19   41.20   11.30
   2  10  19   44.70    7.60
   2 -10 -19   44.60   10.80
  -2 -10  19   49.40    6.10
  -2  10 -19   54.99   14.00
   3  10 -19   96.79   15.40
   3  10  19  101.29   11.80
  -3  10 -19  127.09   16.50
   3 -10 -19   81.59   14.30
   4  10 -19    7.00    7.60
   4  10  19    2.70    3.80
   0 -11 -19   23.70    8.20
   0 -11  19   18.90    3.80
  -1 -11 -19    3.10    6.90
   1 -11  19   12.60    3.30
  -1 -11  19    9.40    3.20
   1 -11 -19    8.00    7.20
   2 -11  19   56.89    6.90
   2  11  19   55.79    8.00
  -2 -11  19   62.29    6.80
  -2  11 -19   70.39   13.70
   2 -11 -19   64.29   11.30
  -3  11 -19   46.90    8.90
   3  11  19   25.50    5.10
   3 -11 -19   20.30    8.60
   0 -12  19    8.50    3.10
   0 -12 -19   12.40    6.90
   1 -12  19   68.49    7.30
  -1 -12  19   68.89    7.30
   1 -12 -19   66.99   11.10
   2 -12 -19   27.30    8.00
   0   0 -20 4339.67  358.76
   0   0 -20 4609.14  360.56
   1   0 -20   13.60    8.10
  -1   0  20   11.20    2.30
  -1   0  20   16.50    3.30
  -1   0 -20   26.30    8.50
  -1   0 -20   15.20    6.00
  -2   0 -20   75.99   10.80
  -2   0  20   77.69    7.30
   2   0 -20   71.39   14.00
  -2   0  20   79.09    8.00
  -3   0  20 1200.98   97.89
  -3   0 -20 1132.19   99.89
  -3   0  20 1336.27   98.39
   3   0 -20 1166.98  103.19
  -3   0 -20 1241.78  103.99
  -4   0  20  109.19    9.70
  -4   0 -20   77.19   11.90
   4   0 -20   93.29   17.10
  -4   0 -20  102.89   16.60
  -5   0 -20   28.30    8.70
  -5   0 -20   53.29   18.00
  -6   0 -20    9.40   12.60
  -6   0  20   41.80    6.50
   0  -1 -20   37.80    8.00
   0   1  20   28.50    3.70
   0   1 -20   30.10    7.30
   0   1 -20   48.20   10.90
   0  -1 -20   43.60   10.50
  -1  -1 -20  239.18   27.00
   1   1 -20  259.87   28.50
  -1   1  20  277.97   22.70
  -1  -1 -20  234.28   25.50
  -1   1  20  306.07   23.30
   1   1  20  279.77   22.60
  -1   1 -20  265.57   25.60
  -1  -1  20  292.97   23.30
   1  -1 -20  268.57   28.10
  -2   1  20   62.39    6.00
  -2   1  20   62.99    6.70
  -2  -1 -20   51.29    9.30
   2   1 -20   62.09   13.30
   2  -1 -20   68.39   12.70
  -2  -1  20   59.09    6.90
  -2  -1  20   61.49    6.10
  -2   1 -20   51.99    9.10
   3   1 -20  239.98   27.90
  -3   1  20  266.77   21.00
  -3   1  20  237.88   20.40
  -3  -1 -20  244.58   27.30
  -3  -1 -20  223.38   23.60
  -3   1 -20  307.37   33.90
  -3  -1  20  261.27   21.10
  -3   1 -20  252.17   27.70
  -3   1 -20  210.88   23.20
   3  -1 -20  242.48   27.40
  -3  -1  20  221.48   20.30
  -4  -1 -20  210.98   24.00
  -4  -1 -20  172.58   20.10
  -4   1  20  207.58   17.40
   4   1 -20  200.38   26.00
   4  -1 -20  185.58   25.10
  -4   1 -20  228.78   24.40
  -4  -1  20  201.48   17.50
  -4   1 -20  167.58   19.60
  -4   1 -20  234.08   32.40
  -5  -1 -20  134.99   17.90
  -5   1 -20  131.49   16.80
  -5   1 -20  142.29   27.60
  -6   1  20  144.59   13.90
  -6  -1  20  141.29   14.10
   0   2 -20   60.79    9.90
   0  -2 -20   50.59    9.70
   0   2  20   56.39    5.60
   0   2 -20   66.99   12.70
   0  -2 -20   63.39   11.80
  -1  -2 -20   72.19   11.90
  -1  -2 -20   96.29   13.90
   1   2 -20   77.19   13.80
  -1   2  20  102.59    9.10
   1   2 -20   82.09   14.90
  -1   2  20   96.69    8.40
   1   2  20   96.09    8.30
   1  -2 -20   84.29   14.00
  -1  -2  20  101.59    9.40
  -1   2 -20   77.99   11.40
  -2  -2 -20   19.40    7.10
  -2   2  20   21.20    3.10
   2   2 -20   17.90   10.20
  -2   2  20   18.10    3.50
  -2   2 -20   15.30    6.10
  -2  -2  20   21.30    4.00
   2  -2 -20   12.90    8.40
   2   2  20   28.80    6.70
  -2  -2  20   34.20    4.60
  -2   2 -20   16.30   11.10
  -3  -2 -20   15.70    8.40
  -3  -2 -20   16.00    7.10
   3   2 -20   27.90   11.50
  -3   2  20   13.90    2.60
  -3   2  20   14.70    3.10
   3   2 -20   18.90    6.30
  -3  -2  20   12.80    2.60
  -3   2 -20   21.30   13.70
   3  -2 -20   14.50    9.50
   3   2  20   29.70    8.10
  -3   2 -20   17.50    9.30
  -3  -2  20   12.80    3.60
  -3   2 -20   14.10    5.80
  -4  -2 -20   58.79   11.00
   4   2 -20   67.69   15.70
  -4   2  20   88.49    8.00
  -4  -2 -20   82.09   14.60
  -4   2 -20   74.79   14.30
  -4   2 -20   89.69   22.50
  -4   2 -20   57.59    9.60
  -4  -2  20   84.69    8.40
   5   2 -20  211.18   27.60
  -5  -2 -20  220.38   24.50
  -5   2 -20  283.07   35.50
  -5   2 -20  212.38   22.30
  -6   2  20  172.48   14.30
  -6  -2  20  148.39   14.70
  -6   2 -20  127.79   13.80
   0   3 -20  121.59   16.60
   0   3 -20   99.49   13.00
   0  -3 -20   77.59   12.00
   0  -3 -20  112.89   15.40
   0   3  20   89.19    8.40
  -1  -3 -20  387.66   36.90
  -1  -3 -20  328.17   35.60
   1   3 -20  372.26   39.00
  -1   3  20  409.26   32.70
   1   3 -20  382.16   36.50
  -1   3  20  464.45   33.40
   1  -3 -20  404.36   37.60
   1   3  20  390.66   32.60
  -1   3 -20  429.26   35.70
  -2   3  20  186.98   15.10
  -2   3  20  195.28   15.60
  -2  -3 -20  138.09   19.00
   2   3 -20  174.98   23.80
  -2   3 -20  151.18   23.00
  -2   3 -20  170.88   18.30
  -2  -3  20  188.38   16.20
   2  -3 -20  162.68   21.20
   3   3 -20  238.78   27.90
  -3  -3 -20  191.98   22.40
   3   3 -20  178.68   22.50
  -3   3  20  231.58   19.00
   3  -3 -20  230.88   25.70
  -3  -3  20  225.18   19.50
  -3   3 -20  276.37   34.00
  -3   3 -20  225.28   21.40
  -3   3 -20  236.28   26.70
  -4  -3 -20  132.09   19.10
  -4   3  20  144.69   12.50
   4   3 -20  131.79   20.80
  -4  -3 -20  133.89   16.70
  -4   3 -20  111.89   14.50
  -4   3 -20  165.58   29.40
  -4   3 -20  157.98   19.90
  -4  -3  20  142.39   13.10
   5   3 -20   88.09   17.10
  -5  -3 -20   99.39   15.80
  -5   3 -20   99.49   12.40
  -5   3 -20  103.09   25.10
  -6   3  20  199.98   15.30
  -6  -3  20  164.28   16.00
  -6   3 -20  143.89   15.10
   0   4 -20  249.88   23.90
   0   4 -20  249.48   26.80
   0  -4 -20  235.98   25.60
   0   4  20  242.28   20.20
  -1   4  20   12.00    3.00
  -1  -4 -20    8.00    7.50
   1  -4  20   18.60    4.10
  -1  -4 -20    5.50    6.60
  -1   4  20    8.90    2.20
   1   4 -20    1.60    9.80
  -1   4  20   16.30    4.70
   1   4 -20    7.80    6.30
   1  -4 -20    9.80    7.80
  -1  -4  20   13.20    3.30
   1   4  20   12.70    2.30
   1   4  20   19.30    5.80
  -1   4 -20   11.10    5.90
  -2   4  20   53.79    5.70
  -2   4  20   53.69    6.30
   2   4 -20   38.90    9.00
   2   4 -20   45.30   13.80
  -2  -4 -20   54.09   10.10
  -2   4 -20   56.69   14.40
  -2   4 -20   48.10    8.80
  -2  -4  20   54.59    7.50
   2  -4 -20   46.10   11.00
  -2  -4  20   72.19    6.60
   2   4  20   68.39   10.20
  -3  -4 -20  299.17   31.40
   3   4 -20  349.27   37.20
  -3   4  20  361.96   28.50
  -3   4 -20  323.97   30.40
  -3  -4  20  323.57   29.00
  -3   4 -20  407.56   44.00
  -3   4 -20  346.87   35.80
   3  -4 -20  333.67   34.10
  -4  -4 -20   40.60    9.30
  -4  -4 -20   44.00   11.20
  -4   4  20   41.60    5.30
   4   4 -20   47.80   14.20
  -4   4 -20   52.29   12.10
  -4   4 -20   58.39   19.90
  -4  -4  20   39.40    6.10
  -5  -4 -20    8.30    7.40
   5   4 -20    8.40   10.50
  -5   4  20   43.40    7.60
  -5   4 -20   11.30   15.60
  -5  -4  20   26.10    8.30
  -6   4  20  426.86   31.30
  -6  -4  20  329.57   32.20
   0   5 -20    8.60    9.70
   0  -5  20    7.80    2.90
   0  -5 -20    8.40    7.50
   0   5 -20    1.10    5.90
   0   5  20    9.10    4.60
   0   5  20    5.80    1.80
  -1   5  20  432.66   35.00
   1   5 -20  415.86   41.60
  -1   5  20  438.56   34.40
  -1  -5 -20  389.86   38.40
   1   5 -20  369.46   37.70
  -1   5 -20  435.26   37.50
   1  -5 -20  445.36   39.70
  -2   5  20  167.28   13.10
   2   5 -20  155.78   23.00
   2   5 -20  114.69   15.90
  -2  -5 -20  111.79   16.40
  -2   5 -20  151.68   22.80
   2  -5 -20  141.99   18.90
  -2  -5  20  142.69   14.50
  -2   5 -20  161.78   16.40
   3   5 -20   41.60   14.10
  -3   5  20   34.60    5.00
  -3  -5 -20   34.40    9.20
  -3  -5  20   33.90    6.10
  -3   5 -20   31.40    7.30
   3  -5 -20   37.10   10.90
  -3   5 -20   41.60   18.30
  -3   5 -20   48.60   13.00
   3   5  20   50.29    9.10
   4   5 -20   54.79   15.00
  -4  -5 -20   41.30   11.40
  -4   5 -20   56.29   11.90
   4   5  20   73.79   10.70
  -4   5 -20   55.89   20.20
   5   5 -20   43.50   12.60
  -5  -5 -20   48.70   10.70
   0   6  20   18.20    3.10
   0   6 -20   23.10    7.80
   0  -6  20   22.00    4.10
   0  -6 -20   22.60    8.70
   0   6 -20   23.90   14.20
   0   6  20   29.00    6.00
   1   6 -20   62.89   14.80
   1  -6  20   67.29    7.50
  -1  -6 -20   53.39   11.40
  -1   6  20   82.39    8.50
   1   6 -20   48.70   10.70
  -1  -6 -20   37.90   10.20
  -1   6  20   48.20    6.90
   1   6  20   76.59   10.60
  -1  -6  20   64.59    7.10
  -1   6 -20   48.90    9.80
   1  -6 -20   54.29   12.00
   2   6 -20  260.47   31.30
  -2   6  20  292.27   23.20
   2  -6 -20  251.67   28.00
  -2   6 -20  273.87   31.90
  -2   6 -20  249.38   25.50
  -3   6  20   28.70    4.40
   3   6 -20   31.90   14.20
  -3  -6 -20   17.80    8.20
  -3   6 -20   42.70   12.50
   3   6  20   37.30    8.20
  -3   6 -20   27.00    6.90
  -3  -6  20   20.50    5.90
   3  -6 -20   29.00   10.30
   4   6 -20  288.37   36.20
   4   6  20  396.56   32.40
  -4   6 -20  341.27   33.80
  -5  -6 -20   46.30   10.40
   5   6 -20   47.00   12.40
   0   7  20   23.50    5.70
   0  -7  20   18.10    3.70
   0  -7 -20   20.30    8.40
   0   7 -20   20.60    8.00
   1   7 -20  107.29   18.60
   1  -7  20  135.69   12.00
   1   7 -20   90.09   16.90
  -1   7  20  115.49   11.90
  -1  -7 -20  106.79   16.80
   1  -7 -20  123.59   18.20
   1   7  20  137.49   14.70
  -1   7 -20  119.39   15.90
  -1  -7  20  135.59   11.90
   2   7 -20   90.39   17.10
  -2  -7 -20   65.39   12.10
   2  -7  20   77.49    8.90
  -2   7  20   64.19    7.90
  -2  -7  20   75.59    8.00
   2  -7 -20   63.29   12.70
  -2   7 -20   76.79   17.10
  -2   7 -20   81.09   11.50
   2   7  20   86.19   12.20
   3   7 -20  -11.80    9.90
  -3   7  20    5.10    3.90
  -3  -7 -20    2.00   10.40
  -3   7 -20    0.40    8.90
   3  -7 -20   -1.90    7.80
   3   7  20    6.30    5.60
   4   7 -20   42.70   13.10
   4   7  20   69.69   10.30
  -4   7 -20   52.19   10.50
  -5  -7 -20   52.29   10.80
   5   7 -20   42.10   11.80
   5   7  20   89.49    9.40
   0  -8  20    3.60    2.50
   0  -8 -20    3.90    6.90
   0   8 -20   10.20    7.40
   0   8  20    2.40    3.90
   1   8 -20  362.26   40.80
   1  -8  20  488.15   36.10
  -1  -8 -20  353.96   38.90
  -1   8  20  416.96   35.90
  -1   8 -20  397.06   38.50
  -1  -8  20  507.35   36.10
   1  -8 -20  402.96   40.10
   2  -8  20   14.40    3.60
   2   8 -20   16.10   11.40
  -2   8  20   11.80    3.20
  -2  -8 -20   18.00    9.90
  -2   8 -20   12.50    6.40
   2  -8 -20   22.20    8.90
  -2   8 -20   14.70   11.70
  -2  -8  20   16.60    3.60
   2   8  20   17.60    6.20
   3   8 -20   30.40   12.20
   3   8  20   38.30    7.80
   3  -8 -20   36.10   10.90
  -3   8 -20   50.49   12.80
   4   8 -20   60.59   13.90
   4   8  20   71.09   10.60
  -4   8 -20   85.29   12.00
  -5   8  20  156.18   14.30
   0  -9  20  147.29   12.90
   0  -9 -20  110.99   17.70
   1  -9  20  103.99   10.40
  -1  -9 -20   89.99   14.70
   1  -9 -20   92.59   15.50
  -1  -9  20  111.39   10.60
   1   9  20  122.39   12.60
   2  -9  20  192.78   17.10
   2   9 -20  159.38   24.00
   2  -9 -20  150.78   21.60
  -2   9 -20  193.08   26.00
  -2  -9  20  207.88   17.20
   2   9  20  218.48   19.50
   3   9 -20   16.10   10.60
  -3   9 -20   18.90    9.10
   3   9  20   20.00    5.80
   3  -9 -20    7.50    8.40
   4   9 -20   63.19   13.10
   4   9  20   76.59   10.40
  -4   9 -20  105.19   11.00
   0 -10 -20   99.79   15.20
   0 -10  20  100.99   10.00
   1 -10  20   11.00    3.10
  -1 -10 -20    9.50    7.60
   1 -10 -20   12.90    7.70
   1  10  20    8.60    4.10
  -1 -10  20   10.30    3.20
   2 -10  20   44.50    5.80
  -2  10 -20   49.80   12.70
   2 -10 -20   48.50   10.40
  -2 -10  20   40.00    5.70
   2  10  20   47.60    7.40
   3  10 -20  117.99   16.70
   3  10  20  126.49   12.70
  -3  10 -20  145.39   17.10
   3 -10 -20   79.69   14.60
   0 -11  20   56.99    6.60
   0 -11 -20   52.99   10.60
   1 -11  20   -0.10    2.30
  -1 -11 -20    4.50    7.00
  -1 -11  20    0.80    2.40
   1 -11 -20    5.30    6.90
   2 -11  20   31.80    4.60
  -2  11 -20   36.50   11.10
   2  11  20   25.30    5.10
   2 -11 -20   23.90    8.60
  -3  11 -20   42.60   11.00
   0 -12 -20   36.60    8.60
   0 -12  20   48.10    5.80
   1 -12  20   69.59    7.20
   1 -12 -20   51.79   10.00
  -1 -12  20   71.99    7.20
   0   0  21    0.60    1.20
   0   0 -21    1.90    7.80
   0   0 -21    2.10    4.90
   0   0  21    6.10    3.90
   1   0  21   65.09    6.10
  -1   0  21   67.79    6.90
  -1   0  21   63.29    6.10
  -1   0 -21   61.89   11.90
  -1   0 -21   52.09    9.40
   1   0 -21   53.79   12.10
   2   0  21   40.00    6.90
  -2   0  21   19.60    3.80
   2   0 -21   12.70    9.60
  -2   0 -21   15.30    6.90
  -2   0  21   19.40    3.00
  -3   0 -21  626.24   53.79
   3   0 -21  531.45   52.39
  -3   0  21  576.34   46.80
  -3   0 -21  549.85   48.90
   4   0 -21   56.89   13.90
  -4   0 -21   50.29   12.20
  -4   0 -21   43.70    8.90
  -4   0  21   66.59    6.70
  -5   0  21   41.90    8.00
  -5   0 -21   18.60    8.20
  -5   0 -21   16.90   14.50
  -6   0  21   27.10    5.00
  -6   0 -21   10.70   12.80
   0   1 -21   33.20   10.30
   0   1  21   60.29    7.80
   0   1  21   31.30    4.00
   0  -1 -21   40.10    8.30
   0   1 -21   25.20    7.50
   0  -1 -21   41.70   10.20
   1  -1  21   34.00    5.80
  -1   1  21   37.90    5.80
  -1   1  21   15.20    3.20
  -1   1  21   19.20    2.80
  -1  -1 -21   13.90    8.50
   1   1 -21   16.30    9.30
  -1  -1 -21   18.80    6.70
   1   1  21   15.00    2.70
   1  -1 -21   16.30    8.80
  -1   1 -21   16.30    6.10
  -1  -1  21   29.00    5.10
   1   1  21   25.70    5.90
  -1  -1  21   17.90    3.90
  -2  -1 -21   47.20    9.30
   2   1 -21   45.00   12.30
  -2   1  21   53.99    6.20
  -2   1  21   56.69    5.50
  -2   1 -21   44.10    8.70
  -2  -1  21   53.19    6.40
  -2  -1  21   53.09    5.50
   2  -1 -21   55.49   12.10
  -3   1  21  173.68   15.30
  -3  -1 -21  165.18   22.50
  -3  -1 -21  154.18   18.60
   3   1 -21  177.38   23.30
   3  -1 -21  156.08   22.80
  -3   1 -21  215.08   28.50
  -3   1 -21  153.98   18.20
  -3  -1  21  181.68   15.50
  -3   1 -21  180.78   22.80
   4   1 -21   61.59   15.00
  -4  -1 -21   73.39   10.20
  -4   1  21   51.49    6.60
  -4  -1 -21   67.39   13.30
  -4   1 -21   61.89    9.40
   4  -1 -21   64.59   14.70
  -4   1 -21   83.09   20.80
  -4   1 -21   75.29   13.90
  -4  -1  21   52.69    6.80
  -5  -1 -21   48.70   16.90
   5   1 -21   33.80   13.00
  -5  -1 -21   40.30   10.00
  -5   1 -21   42.80   17.80
  -5   1 -21   34.40    8.80
  -6  -1 -21   11.50   13.00
  -6   1  21   49.20    6.50
  -6   1 -21   21.20   13.10
  -6  -1  21   45.20    6.70
   0  -2 -21  387.56   39.50
   0   2 -21  481.25   39.90
   0   2 -21  465.75   42.20
   0   2  21  442.56   36.60
   0  -2 -21  489.35   41.90
  -1   2  21  182.48   14.70
  -1  -2 -21  133.79   18.40
   1   2 -21  166.58   22.10
  -1   2  21  195.28   15.30
  -1  -2 -21  150.28   20.00
   1   2  21  170.98   14.50
   1  -2 -21  171.58   20.90
  -1   2 -21  161.98   18.10
   2  -2  21   16.90    4.80
  -2   2  21    9.00    2.20
  -2  -2 -21    7.00    6.30
  -2   2  21   10.00    2.80
   2   2 -21    7.10    9.80
   2   2  21   16.90    6.00
   2  -2 -21   12.90    8.30
  -2  -2  21   15.50    3.50
  -2   2 -21    8.30    5.60
  -2  -2  21    9.30    3.30
  -3   2  21  203.28   16.20
   3   2 -21  178.58   24.40
  -3  -2 -21  170.68   22.90
  -3  -2 -21  163.18   19.50
  -3   2 -21  188.38   23.90
  -3   2 -21  154.68   18.60
  -3  -2  21  181.98   16.30
   3  -2 -21  183.08   23.00
  -3   2 -21  210.58   30.00
  -4  -2 -21   52.69   12.20
   4   2 -21   55.59   14.60
  -4  -2 -21   48.90    9.70
  -4   2  21   44.10    5.60
  -4  -2  21   47.40    6.10
  -4   2 -21   63.39   19.70
   4  -2 -21   46.70   13.80
  -4   2 -21   62.29   13.40
  -4   2 -21   46.30    8.10
   5   2 -21   24.70   12.60
  -5  -2 -21   31.60    9.40
  -5   2 -21   30.00    7.60
  -5   2 -21   37.70   15.90
  -6   2  21  110.09   10.20
  -6  -2  21   89.49   10.60
   0  -3 -21  297.37   33.60
   0   3  21  394.56   30.70
   0   3 -21  392.86   36.60
   0   3 -21  394.06   34.10
   0  -3 -21  391.06   36.00
  -1   3  21   14.20    4.60
  -1  -3 -21    6.60    6.30
   1  -3  21    8.30    3.60
   1   3 -21    6.00   10.00
  -1   3  21    4.10    1.60
  -1  -3 -21    1.90    7.40
  -1   3  21    5.20    2.40
   1   3  21    8.90    5.00
   1   3  21    3.50    1.60
  -1   3 -21    5.80    5.40
  -1  -3  21   10.00    3.40
   1  -3 -21    9.00    7.70
  -2   3  21  109.99    9.70
  -2  -3 -21   97.79   14.00
  -2   3  21  111.09   10.20
   2   3 -21  119.99   18.90
  -2  -3  21  108.09   10.80
   2  -3 -21   99.49   16.30
  -2   3 -21  101.59   14.00
   3   3 -21   71.19   15.90
  -3   3  21   80.19    7.80
  -3  -3 -21   57.29   11.10
   3  -3 -21   76.99   14.60
  -3   3 -21   93.19   21.00
  -3   3 -21   64.79   10.30
  -3   3 -21   91.29   16.40
  -3  -3  21   74.49    8.40
  -4   3  21   32.70    4.30
  -4  -3 -21   18.30    7.70
   4   3 -21   27.80   12.20
  -4  -3 -21   29.90   10.00
  -4   3 -21   32.30    9.90
  -4  -3  21   26.20    4.70
  -4   3 -21   22.00   16.00
   4  -3 -21   28.00   11.70
  -4   3 -21   19.90    6.80
  -5  -3 -21   18.10    8.20
   5   3 -21   12.80   11.00
  -5  -3  21   32.90    6.60
  -5   3 -21   13.20    5.60
  -5   3 -21    8.20   14.20
  -6   3  21   14.80    3.00
  -6  -3  21   11.30    3.70
   0  -4  21   26.00    4.70
   0   4 -21   23.70    7.10
   0   4 -21   20.60   10.60
   0  -4 -21   22.40    9.00
   0   4  21   19.10    3.00
   0   4  21   37.70    6.90
  -1   4  21   15.50    2.90
  -1  -4 -21   12.70    7.40
  -1  -4 -21   15.20    8.30
   1   4 -21   22.80   11.20
  -1   4  21   28.20    5.50
  -1   4  21   20.00    3.70
   1  -4  21   34.40    5.50
  -1  -4  21   27.80    4.70
  -1   4 -21   18.00    6.90
   1  -4 -21   25.40    9.40
   1   4  21   24.60    6.50
   1   4  21   22.20    3.10
   2   4 -21  113.29   18.90
  -2   4  21  118.89   10.50
  -2  -4 -21   82.29   13.90
   2  -4 -21  104.79   16.40
  -2   4 -21  121.69   14.30
  -2   4 -21  124.89   22.30
  -2  -4  21  105.59   11.20
   3   4 -21   16.40   12.00
  -3  -4 -21   11.80    7.60
  -3   4  21   18.80    3.40
  -3   4 -21   20.60   15.20
   3  -4 -21   15.20    9.70
  -3   4 -21   14.10    6.10
  -3   4 -21   21.70   10.60
   3   4  21   34.00    8.20
  -3  -4  21   15.50    4.40
  -4  -4 -21  115.59   19.20
   4   4 -21  141.59   21.30
  -4  -4 -21  136.09   19.50
  -4   4  21  136.69   13.70
   4  -4 -21  149.09   21.50
  -4   4 -21  142.69   28.00
  -4  -4  21  118.39   15.10
  -4   4 -21  169.38   20.30
  -5  -4 -21   80.09   13.50
   5   4 -21   72.39   15.20
  -5   4 -21   94.49   23.30
   0   5  21    2.60    1.60
   0   5 -21    0.60    9.40
   0  -5 -21   -3.10    7.00
   0   5  21    2.00    4.10
   0  -5  21    2.50    2.50
   0   5 -21   -3.80    5.50
  -1   5  21   39.30    5.80
  -1  -5 -21   40.40   10.60
  -1   5  21   45.50    5.40
  -1  -5 -21   26.10    9.60
   1   5 -21   48.00   13.50
  -1   5 -21   42.40    8.80
   1   5  21   72.49    9.60
   1  -5 -21   43.00   10.80
  -1  -5  21   60.79    6.50
   2   5 -21  333.47   35.80
  -2  -5 -21  269.47   30.80
  -2   5  21  361.06   28.00
  -2   5 -21  286.47   30.10
   2  -5 -21  348.67   33.30
  -2   5 -21  384.46   37.50
  -3   5  21   10.60    2.80
   3   5 -21   12.00   12.20
  -3  -5 -21    7.70    7.50
  -3   5 -21   13.90    5.40
   3  -5 -21   12.90    9.00
  -3   5 -21   12.20    9.90
  -3  -5  21    4.80    4.20
   3   5  21    8.20    6.20
  -4  -5 -21    9.10    8.00
   4   5 -21   12.80   11.20
   4  -5 -21    0.70   11.10
   4   5  21   17.40    6.40
  -4   5 -21    3.50    7.50
  -5  -5 -21    3.20    7.00
   5   5 -21    1.20    9.40
   0   6 -21  116.99   18.90
   0   6  21  191.08   17.70
   0  -6  21  187.48   16.00
  -1   6  21  547.25   40.70
  -1  -6 -21  436.56   43.80
   1   6 -21  495.05   47.10
   1  -6 -21  504.75   45.30
  -1   6 -21  443.96   42.80
   2   6 -21  482.45   46.30
  -2   6  21  480.35   38.40
  -2   6 -21  498.45   47.40
   2  -6 -21  419.76   42.70
  -2   6 -21  432.86   40.50
  -3   6  21   28.20    4.30
   3   6 -21   21.60   12.90
  -3  -6 -21   11.80    7.70
  -3   6 -21   23.10    6.40
   3  -6 -21   14.50    9.50
  -3  -6  21   30.80    5.90
   3   6  21   43.50    8.90
  -3   6 -21   29.40   11.30
   4   6 -21  199.38   27.70
  -4   6 -21  260.07   25.50
  -5  -6 -21   36.30    9.40
   5   6 -21   45.50   11.10
   0   7 -21  130.09   19.00
   0   7  21  204.28   17.30
   0  -7  21  177.28   15.50
   0  -7 -21  127.99   20.30
  -1  -7 -21  231.48   27.60
  -1   7  21  252.87   24.00
   1  -7  21  330.07   24.40
   1   7 -21  247.28   30.30
  -1   7 -21  240.78   26.80
  -1  -7  21  333.97   24.30
   1  -7 -21  251.67   28.80
   2   7 -21  324.47   36.60
  -2   7  21  335.67   29.60
   2  -7 -21  305.97   34.20
  -2   7 -21  346.27   38.50
  -2   7 -21  299.37   31.70
  -2  -7  21  439.46   29.90
   3   7 -21   85.39   17.70
  -3   7 -21   93.79   17.10
   3   7  21  118.49   13.60
   3  -7 -21   83.59   15.10
   4   7 -21  175.48   26.20
  -4   7 -21  246.48   24.30
   4   7  21  267.77   23.00
   5   7 -21   17.40    9.30
  -5  -7 -21   15.60    7.60
   0   8 -21   15.20    8.00
   0  -8  21   18.30    3.80
   0  -8 -21   15.00    8.30
   0   8  21   27.10    5.50
  -1   8  21  368.96   35.30
  -1  -8 -21  324.67   38.10
   1  -8  21  463.25   35.50
  -1  -8  21  476.95   35.50
   1   8  21  493.45   37.30
   1  -8 -21  371.26   39.40
   2   8 -21  295.97   36.40
   2  -8  21  368.36   30.90
  -2   8 -21  333.97   38.70
  -2  -8  21  393.06   30.90
   2   8  21  402.06   33.20
   3   8 -21  106.49   18.10
   3  -8 -21   85.89   15.60
   3   8  21  138.09   14.30
  -3   8 -21  144.89   19.70
   4   8 -21   19.40   10.50
   4   8  21   43.10    7.20
  -4   8 -21   44.50    8.10
   0  -9  21   14.30    3.50
   0  -9 -21   11.60    7.60
   1  -9  21  277.47   23.00
  -1  -9 -21  204.28   25.90
  -1  -9  21  283.77   23.00
   1  -9 -21  209.28   26.90
   1   9  21  319.47   24.70
   2  -9  21   21.70    4.10
   2   9 -21   29.10   11.40
   2   9  21   36.20    6.80
   2  -9 -21   22.70    9.10
  -2  -9  21   27.30    4.30
  -2   9 -21   39.50   12.60
   3   9 -21   27.30   11.20
  -3   9 -21   48.30   11.50
   3   9  21   47.50    7.30
   3  -9 -21   29.00   10.00
   4   9 -21   36.50    9.50
   4   9  21   31.50    5.80
   0 -10  21  105.89   10.10
   0 -10 -21   87.89   14.30
  -1 -10 -21   94.09   16.50
   1 -10  21  138.59   12.80
  -1 -10  21  144.89   12.80
   1  10  21  160.78   13.90
   1 -10 -21  128.49   17.70
   2 -10  21   42.40    5.70
  -2  10 -21   50.39   12.60
   2 -10 -21   37.10    9.90
   2  10  21   42.90    6.70
  -2 -10  21   41.80    5.60
   3  10 -21   33.40    9.20
  -3  10 -21   49.70    9.90
   3 -10 -21   25.00    8.80
   3  10  21   38.00    6.20
   0 -11 -21    1.50    6.60
   0 -11  21    4.30    2.50
   1 -11  21   41.60    5.40
  -1 -11  21   44.20    5.50
   1 -11 -21   33.90    9.00
   2 -11  21    4.00    2.60
   2  11  21    4.20    3.10
   2 -11 -21    4.20    6.50
  -2  11 -21    1.80    8.20
   0 -12  21  141.79   12.70
   0   0 -22  832.92   71.79
   0   0  22  880.31   68.99
   0   0 -22  848.42   73.69
  -1   0 -22    3.40    5.70
  -1   0  22    3.90    2.60
  -1   0 -22    5.70   11.00
  -1   0  22    5.70    1.80
   1   0 -22    3.90    8.50
  -1   0  22   11.50    4.10
   1   0  22    7.00    1.90
   1   0  22   15.80    5.20
  -2   0  22   -0.20    2.10
  -2   0 -22   -3.80    5.60
   2   0  22    0.90    4.20
  -2   0  22    0.50    2.40
   2   0 -22    1.20    8.50
  -2   0  22    0.90    1.50
  -3   0 -22    5.60    8.40
  -3   0 -22    3.40    5.70
   3   0 -22   -3.50    8.80
  -3   0  22    0.50    2.10
   4   0 -22  593.04   58.69
  -4   0  22  647.74   52.29
  -4   0 -22  671.33   58.59
  -5   0 -22    2.90   12.40
   5   0 -22   -8.10   12.10
  -5   0 -22   -3.70    6.00
  -5   0  22    0.20    4.50
  -6   0  22   23.60    4.60
   0   1  22   11.50    2.30
   0   1  22   31.00    6.10
   0  -1  22   31.90    5.50
   0   1 -22   17.80    9.30
   0  -1 -22   17.60    7.00
   0  -1 -22    5.70    8.60
   0   1 -22    8.70    6.40
  -1  -1 -22  440.16   40.80
  -1   1  22  473.85   36.40
  -1  -1 -22  394.16   39.30
   1   1 -22  454.25   42.40
  -1   1  22  487.25   37.00
   1   1  22  421.66   36.20
  -1  -1  22  427.76   36.40
   1  -1 -22  470.75   42.20
  -1   1 -22  435.46   39.40
   2   1 -22   83.59   15.30
  -2  -1 -22   71.69   11.50
  -2   1  22   75.89    7.20
  -2   1  22   73.89    7.90
  -2   1 -22   68.19   11.10
  -2  -1  22   72.59    7.20
  -2  -1  22   80.39    8.20
   2  -1 -22   76.79   14.40
  -3  -1 -22   19.80    9.80
  -3   1  22   30.00    4.40
  -3  -1 -22   30.40    8.20
   3   1 -22   36.00   12.20
   3  -1 -22   25.70   11.50
  -3   1 -22   35.40    7.70
  -3   1 -22   42.70   21.60
  -3  -1  22   31.20    4.60
  -3   1 -22   33.40   11.00
  -4  -1 -22   32.80    8.10
   4   1 -22   36.80   13.00
  -4  -1 -22   49.80   12.30
  -4   1  22   38.70    5.20
  -4  -1  22   39.40    5.30
   4  -1 -22   31.10   12.20
  -4   1 -22   35.90    7.90
  -4   1 -22   49.50   17.60
  -4   1 -22   41.90   11.40
  -5  -1 -22    0.90    6.70
  -5   1  22    8.40    5.40
   5   1 -22    2.80   10.30
  -5  -1 -22    1.20   11.60
  -5   1 -22    3.40   13.20
  -5   1 -22   -1.60    5.60
  -5  -1  22    2.90    4.70
  -6   1  22  330.97   27.40
  -6  -1  22  309.87   27.60
   0  -2 -22   -1.50    7.40
   0  -2 -22   -5.20    5.60
   0   2 -22    9.60    9.30
   0   2  22    2.90    3.90
   0   2 -22    2.90    5.70
   0   2  22    1.70    1.40
   0  -2  22    0.30    3.00
   1   2 -22   77.19   14.90
  -1  -2 -22   61.89   10.70
  -1  -2 -22   64.89   12.50
  -1   2  22   68.89    7.30
  -1   2  22   66.09    6.40
   1   2  22   63.79    6.30
  -1   2 -22   61.49   10.40
   1  -2 -22   70.39   13.50
  -2   2  22  181.98   15.00
   2   2 -22  205.38   24.30
  -2   2  22  166.58   14.40
  -2  -2 -22  158.68   18.70
  -2  -2  22  146.89   14.40
  -2  -2  22  169.08   15.20
   2  -2 -22  168.98   21.60
  -2   2 -22  170.68   18.50
   3   2 -22  247.38   27.50
  -3   2  22  219.98   18.30
  -3  -2 -22  193.48   21.80
  -3   2 -22  227.48   26.80
   3  -2 -22  210.08   25.00
  -3   2 -22  196.68   21.30
  -3  -2  22  200.78   18.40
   4   2 -22   90.69   17.70
  -4  -2 -22   90.79   13.00
  -4  -2 -22   88.29   16.00
  -4   2  22  113.79    9.70
  -4   2 -22   69.79   11.60
   4  -2 -22  107.39   17.80
  -4  -2  22  108.39   10.00
  -4   2 -22  107.39   17.50
  -4   2 -22  106.89   23.10
   5   2 -22   87.79   16.70
  -5  -2 -22   96.19   15.20
  -5   2 -22  108.79   24.00
  -5   2 -22   89.09   13.00
  -6   2  22   11.90    3.10
  -6  -2  22    9.30    3.50
   0   3 -22  167.38   18.30
   0   3  22  162.48   13.90
   0  -3 -22  151.78   20.30
   0   3 -22  173.48   21.60
   1   3 -22   64.49   14.50
  -1  -3 -22   71.89   12.50
  -1  -3 -22   58.39   10.80
  -1   3  22   77.49    7.60
  -1   3  22   72.09    6.70
  -1   3 -22   54.19   10.20
   1   3  22   68.49    6.60
   1  -3 -22   69.09   13.30
   2   3 -22   40.40   13.30
  -2  -3 -22   25.70    8.60
   2  -3  22   63.69    8.00
  -2   3  22   33.40    4.90
  -2  -3  22   36.70    5.70
   2   3  22   52.59    8.80
   2  -3 -22   44.20   11.20
  -2   3 -22   40.30    8.60
  -3  -3 -22   12.50    7.50
  -3   3  22   11.90    3.00
   3   3 -22   19.80   12.10
   3  -3 -22    6.20    8.70
  -3   3 -22   10.20    9.30
  -3   3 -22   15.90    6.00
  -3  -3  22   14.40    3.90
   3   3  22   24.60    7.20
   4   3 -22   55.99   14.70
  -4  -3 -22   52.59   12.70
  -4   3 -22   59.59   12.90
   4  -3 -22   48.30   13.60
  -4   3 -22   59.59   19.20
   5   3 -22   24.30   11.30
  -5  -3 -22   12.30    7.90
  -5   3 -22   19.50   14.70
  -5   3 -22   14.80    5.50
   0   4 -22  181.78   22.90
   0   4  22  181.68   15.50
   0   4 -22  179.98   19.90
   0  -4 -22  187.28   21.90
  -1   4  22  593.94   45.30
  -1   4  22  618.44   45.70
   1   4 -22  516.95   51.49
  -1  -4 -22  494.85   49.10
   1  -4 -22  545.75   50.39
  -1   4 -22  510.95   47.90
  -2   4  22  701.43   51.89
   2   4 -22  654.43   58.79
  -2   4 -22  630.14   59.89
   2  -4 -22  638.64   56.89
  -2  -4  22  559.84   52.29
  -2   4 -22  614.54   54.09
  -3  -4 -22   85.39   13.70
   3   4 -22  106.89   19.20
  -3   4  22  110.89   10.20
   3  -4 -22  107.09   16.50
  -3   4 -22  123.89   19.80
  -3  -4  22  101.49   10.80
  -3   4 -22  114.29   13.90
  -3   4 -22  136.19   37.60
   4   4 -22   56.69   15.00
  -4  -4 -22   62.29   13.60
  -4   4 -22   78.09   20.50
  -4   4 -22   80.19   14.20
   4  -4 -22   66.99   14.00
  -5  -4 -22    0.70    6.50
  -5   4  22    4.70    4.60
   5   4 -22   -8.20    9.00
  -5   4 -22   -1.20   13.40
   0   5 -22   36.90    9.40
   0  -5  22   50.09    6.60
   0  -5 -22   29.70   10.40
   0   5  22   56.99    8.40
  -1   5  22  248.28   19.50
  -1  -5 -22  154.68   22.90
   1   5 -22  219.28   27.30
  -1  -5 -22  213.18   24.20
   1  -5 -22  249.78   26.10
  -1   5 -22  224.38   22.70
   2   5 -22  107.19   18.70
  -2   5  22   97.59    9.70
  -2  -5 -22   63.59   12.90
  -2   5 -22   81.79   12.60
   2   5  22  149.19   14.60
   2  -5 -22   95.39   15.90
  -3   5  22    3.90    2.30
   3   5 -22    8.80   11.40
  -3  -5 -22    4.80    7.10
   3   5  22   11.50    6.20
  -3  -5  22    2.20    3.60
  -3   5 -22    7.70    5.80
  -3   5 -22    2.10    9.50
   3  -5 -22    1.70    8.60
   4   5 -22   10.80   11.00
  -4  -5 -22   14.20    8.70
   4   5  22   31.00    7.20
   4  -5 -22   11.10    9.80
  -4   5 -22   10.50    7.90
   5   5 -22   42.40   11.60
  -5  -5 -22   40.00    9.80
   0   6  22   72.29    9.70
   0  -6  22   69.79    7.80
   0  -6 -22   47.80   11.90
   0   6 -22   66.59   11.80
  -1  -6 -22    6.20    9.40
   1  -6  22    3.50    2.80
  -1  -6 -22    3.80    7.50
  -1   6  22    8.60    4.20
   1   6 -22    4.20   10.40
  -1   6  22    4.00    2.70
   1  -6 -22    8.80    8.10
   1   6  22    1.50    4.60
  -1  -6  22    3.70    2.70
  -1   6 -22    2.80    5.80
   2   6 -22  497.85   48.00
  -2   6  22  527.75   40.90
   2  -6 -22  457.25   45.40
  -2   6 -22  501.15   49.60
  -2   6 -22  469.95   43.10
   3   6 -22  116.69   19.80
  -3   6 -22  126.79   20.30
   3  -6 -22  108.79   17.50
   4   6 -22   73.79   15.50
   4  -6 -22   74.59   14.80
  -4   6 -22  105.99   15.10
   5   6 -22   48.10   11.00
  -5  -6 -22   43.60    9.50
   0  -7  22  420.66   35.30
   1   7 -22  198.68   26.00
  -1   7  22  196.18   19.70
   1  -7  22  253.07   20.10
   1  -7 -22  174.98   24.60
  -1  -7  22  260.67   20.00
  -1   7 -22  173.68   22.40
   1   7  22  267.57   22.30
   2  -7  22    7.60    3.20
   2   7 -22    4.80   10.80
  -2  -7 -22    2.50   12.50
  -2   7  22    7.60    3.20
   2   7  22    8.50    5.40
  -2  -7  22    8.00    3.00
  -2   7 -22    3.70    6.10
  -2   7 -22   10.10   11.20
   2  -7 -22    6.50    8.30
   3   7 -22  205.18   26.60
   3  -7 -22  182.98   24.30
  -3   7 -22  273.57   27.60
   4   7 -22   34.60   11.70
   4   7  22   51.69    8.10
   4  -7 -22   46.10   12.40
  -4   7 -22   57.89   10.00
   0   8 -22   -1.20   10.50
   0  -8  22    7.40    2.90
   0  -8 -22    0.50    7.20
   0   8  22    6.90    3.90
   1  -8  22  343.57   30.10
   1   8  22  378.86   31.80
  -1  -8  22  355.86   30.10
   2   8 -22    5.60    9.70
   2  -8  22    3.30    2.60
  -2  -8  22    8.10    2.90
  -2   8 -22    5.70   10.50
   2   8  22    8.60    4.90
   2  -8 -22    3.30    7.70
   3   8 -22   18.30   10.30
   3  -8 -22    3.80    8.20
   3   8  22   10.60    4.90
  -3   8 -22    5.00    8.30
   4   8 -22   -1.50    8.20
  -4   8 -22   11.50    5.50
   4  -8 -22   -5.10    8.40
   4   8  22   11.60    4.40
   0  -9 -22    6.40    7.60
   0  -9  22    6.10    2.80
   1  -9  22   51.49    6.10
  -1  -9 -22   28.70    9.80
   1   9  22   52.39    7.40
  -1  -9  22   49.00    6.10
   1  -9 -22   35.90   10.50
   2  -9  22  169.38   15.20
   2   9 -22  161.48   20.80
   2  -9 -22  123.59   19.50
  -2   9 -22  169.88   23.80
  -2  -9  22  177.88   15.30
   2   9  22  201.88   17.20
   3   9 -22   -3.20    8.40
   3   9  22    2.80    4.00
  -3   9 -22    0.80    7.30
   3  -9 -22   -2.90    7.30
   0 -10  22   45.50    5.60
   0 -10 -22   24.70    8.80
   1 -10  22  184.58   16.10
   1 -10 -22  139.39   19.80
   1  10  22  196.88   16.70
  -1 -10  22  183.48   16.00
   2 -10  22    7.40    2.80
   2 -10 -22    3.30    6.80
   2  10  22    7.20    3.70
  -2 -10  22    5.40    3.90
  -2  10 -22    3.60    8.40
   3 -10 -22   14.00    9.20
   3  10  22   29.40    5.10
  -3  10 -22   33.60    8.40
   0 -11  22  118.99   10.50
   0 -11 -22   88.79   13.90
   1 -11  22   60.79    6.50
  -1 -11  22   59.99    6.50
   1 -11 -22   40.40    9.40
   2 -11 -22   20.70    7.50
   0   0  23   -1.80    1.30
   0   0 -23   -1.00    5.70
   0   0  23   -0.10    3.80
   0   0 -23    5.10    8.60
  -1   0  23    9.90    4.10
   1   0 -23    5.10    8.90
  -1   0 -23    5.70    5.90
   1   0  23    8.60    4.70
  -1   0  23    4.20    1.70
   1   0  23    2.00    1.60
   2   0 -23  128.39   19.70
  -2   0  23  139.89   12.10
  -2   0 -23  103.09   15.20
   3   0 -23   81.79   15.30
  -3   0 -23   79.19   15.40
  -3   0 -23   58.99   10.60
  -3   0  23   72.19    7.60
  -4   0 -23    3.10    8.20
   4   0 -23    3.30   10.40
  -4   0 -23    2.90   12.40
   5   0 -23   31.90   12.60
  -5   0 -23   38.60    9.30
  -5   0 -23   46.10   16.70
   0   1 -23 1022.90   86.09
   0  -1 -23 1073.29   87.89
   0  -1 -23  947.91   85.89
   0   1  23 1049.30   83.09
   0   1 -23 1075.29   88.09
  -1   1  23   26.30    4.20
  -1  -1 -23   23.90    9.80
  -1  -1 -23   20.90    8.00
  -1   1  23   22.80    3.20
   1   1 -23   22.60   10.80
  -1   1 -23   28.20    7.90
   1  -1 -23   29.00   10.80
  -1  -1  23   25.10    3.60
   1   1  23   27.40    3.50
   1   1  23   50.89    7.70
  -2  -1 -23  172.28   20.40
   2   1 -23  184.98   24.70
  -2   1  23  199.78   16.80
   2  -1 -23  168.18   23.60
  -2   1 -23  176.18   20.10
  -2  -1  23  202.38   16.90
  -3  -1 -23  164.48   20.00
   3   1 -23  169.08   24.80
  -3  -1 -23  183.18   26.80
  -3   1  23  196.68   16.40
   3  -1 -23  184.48   23.80
  -3   1 -23  214.08   25.10
  -3  -1  23  188.78   16.50
  -3   1 -23  170.38   19.50
  -4  -1 -23  399.86   40.70
   4   1 -23  398.16   41.40
  -4   1 -23  446.36   41.20
  -4   1 -23  486.75   48.20
   4  -1 -23  358.66   40.40
  -5  -1 -23   29.90   14.30
  -5  -1 -23   18.30    7.90
   5   1 -23   18.60   11.10
  -5   1 -23   15.70    7.00
   5  -1 -23   25.70   18.30
  -5   1 -23   26.00   14.30
   0   2 -23 1040.20   89.39
   0  -2 -23 1102.69   89.59
   0   2  23 1045.30   84.69
   0   2 -23 1029.10   87.69
  -1   2  23  305.47   23.60
  -1  -2 -23  245.68   28.00
   1   2 -23  316.47   30.90
  -1  -2 -23  235.28   26.70
  -1   2  23  272.47   22.90
  -1   2 -23  307.77   27.10
   1  -2 -23  307.47   29.90
   1   2  23  248.48   22.80
  -2  -2 -23  117.49   16.20
  -2   2  23  138.09   12.50
   2   2 -23  143.99   21.50
   2  -2 -23  141.89   20.50
  -2   2 -23  140.69   16.40
  -2  -2  23  133.99   12.70
   3   2 -23  186.38   24.80
  -3   2  23  201.08   15.80
  -3  -2 -23  160.78   19.40
  -3   2 -23  175.98   24.20
  -3  -2  23  181.98   16.00
  -3   2 -23  146.49   18.90
   3  -2 -23  161.78   23.00
   4   2 -23    7.90   11.30
  -4  -2 -23   15.10    8.80
  -4   2 -23   13.50    9.10
  -4   2 -23   17.00   14.60
   4  -2 -23    8.00   10.30
   5   2 -23   80.99   15.40
  -5  -2 -23   82.99   14.20
  -5  -2 -23   87.29   18.40
  -5   2 -23   83.49   20.70
  -5   2 -23   81.29   12.00
   0   3  23  193.68   16.80
   0   3 -23  198.28   24.50
   0   3 -23  211.58   21.60
   0  -3 -23  205.68   23.70
  -1  -3 -23   18.10    8.40
  -1  -3 -23   24.60    9.90
  -1   3  23   24.80    4.40
   1   3 -23   36.10   12.40
  -1   3  23   49.70    7.00
  -1  -3  23   45.20    6.10
   1  -3 -23   32.50   11.20
  -1   3 -23   24.60    8.00
   1   3  23   35.60    7.30
   2   3 -23  356.96   35.50
  -2  -3 -23  253.37   29.80
  -2   3  23  334.97   26.70
  -2   3 -23  341.67   29.80
  -2  -3  23  289.97   26.90
   2  -3 -23  348.27   33.40
  -3   3  23   61.19    6.40
   3   3 -23   57.39   14.80
  -3  -3 -23   46.60   10.20
   3  -3 -23   56.69   13.50
  -3   3 -23   61.49   14.70
  -3   3 -23   45.10    9.10
  -3  -3  23   53.89    7.00
  -4  -3 -23    9.70    8.40
  -4   3  23   25.90    7.60
   4   3 -23    7.80   11.00
   4  -3 -23    0.20   10.00
  -4   3 -23    5.70    8.30
  -4   3 -23   14.80   14.20
   4   3  23   17.20    8.90
   5   3 -23   22.50   10.40
  -5  -3 -23   10.80    7.60
  -5  -3  23   32.90    8.00
  -5   3 -23   18.90   13.80
  -5   3 -23   13.10    5.00
   0  -4 -23  123.69   18.30
   0   4 -23  143.79   19.90
   0   4 -23  144.49   17.20
  -1  -4 -23   42.10   11.00
   1   4 -23   45.90   13.80
  -1  -4 -23   16.50    9.20
  -1   4  23   71.89    8.30
   1  -4  23   52.09    7.50
   1  -4 -23   43.20   12.00
  -1   4 -23   35.50    9.10
   1   4  23   60.59    9.30
  -1  -4  23   55.19    7.00
   2   4 -23    6.60   11.00
  -2   4  23    6.30    2.50
  -2  -4 -23    4.50    7.50
   2  -4  23   12.70    4.10
  -2  -4  23    6.40    3.00
   2  -4 -23    1.80    8.30
  -2   4 -23    8.20    6.50
   2   4  23   13.30    6.10
   3   4 -23  294.37   32.10
  -3   4  23  296.97   23.00
  -3  -4 -23  228.58   26.20
   3  -4 -23  253.27   29.20
  -3  -4  23  248.98   23.20
  -3   4 -23  253.47   25.30
  -3   4 -23  320.77   32.10
  -4  -4 -23   43.70   11.60
   4   4 -23   50.39   13.70
   4   4  23   69.69    9.50
   4  -4 -23   29.40   11.70
  -4   4 -23   46.40   11.60
  -4   4 -23   30.70   16.60
   0  -5  23   75.99    8.20
   0   5 -23   43.90   10.90
   0  -5 -23   44.70   12.30
   0   5  23   81.99   10.10
   1   5 -23  252.17   29.10
  -1   5  23  268.47   21.70
  -1  -5 -23  226.58   26.20
  -1   5 -23  226.58   24.50
   1  -5 -23  261.57   27.80
   2   5 -23  144.09   21.00
  -2   5  23  136.79   11.90
  -2  -5 -23   88.59   15.40
  -2   5 -23  116.19   15.60
   2  -5 -23  140.49   19.40
   3   5 -23   86.99   17.40
   3  -5 -23   88.19   15.20
  -3   5 -23  106.49   18.20
   4   5 -23    1.90   10.10
  -4  -5 -23    2.30    7.60
  -4   5 -23    4.20    7.30
   4  -5 -23    3.10    8.40
   4   5  23    4.10    4.90
   5   5 -23   46.80   11.10
  -5  -5 -23   45.90    9.70
   0   6  23  291.37   24.70
   0  -6  23  251.17   23.20
   1  -6  23   35.60    5.40
  -1   6  23   21.30    4.50
  -1  -6 -23   26.50    9.50
   1   6 -23   24.80   11.70
   1  -6 -23   22.40    9.80
  -1  -6  23   34.10    5.10
   1   6  23   46.50    8.00
  -1   6 -23   27.80    8.10
   2   6 -23    4.40   10.70
  -2  -6 -23    4.40    8.20
   2  -6  23    9.60    3.50
  -2   6  23    6.00    2.70
  -2   6 -23    8.50    6.10
  -2   6 -23   10.10   11.40
   2   6  23    6.90    5.40
   2  -6 -23   -1.10    8.40
  -2  -6  23    9.60    3.00
   3   6 -23  170.48   24.10
   3  -6 -23  158.98   21.50
  -3   6 -23  189.38   23.90
   4   6 -23    8.30    9.80
   4  -6 -23   10.40    8.90
   4   6  23   13.80    5.30
  -4   6 -23    2.20    6.80
  -5   6  23   77.49    9.10
   0   7  23  178.08   16.30
   0  -7  23  169.38   15.00
   0  -7 -23  118.49   19.30
   1   7 -23  455.65   44.20
  -1   7  23  411.86   33.90
  -1  -7 -23  349.27   36.30
   1  -7 -23  404.06   38.10
  -1   7 -23  377.76   35.80
   2   7 -23   12.60   10.50
   2  -7  23   13.70    3.50
  -2   7 -23    4.60   10.50
   2   7  23   14.00    5.60
   2  -7 -23    8.10    8.40
  -2  -7  23   14.60    3.50
   3   7 -23   14.20   10.40
   3  -7 -23   14.90    9.30
  -3   7 -23   16.40   10.20
   3   7  23   23.00    6.20
   4   7 -23   29.90   10.20
  -4   7 -23   37.00    8.20
   4   7  23   42.00    6.90
   4  -7 -23   33.00   10.30
   0  -8  23  387.16   34.40
   0   8  23  443.26   35.30
   1  -8  23  179.18   16.10
  -1  -8  23  182.08   16.10
   1  -8 -23  128.39   20.70
   1   8  23  209.78   17.90
   2   8 -23   50.69   13.50
   2  -8  23   72.29    7.90
  -2   8 -23   74.29   15.90
   2   8  23   78.09   10.30
  -2  -8  23   82.89    8.00
   2  -8 -23   65.49   13.10
   3   8 -23   65.29   13.90
   3  -8 -23   66.19   12.90
  -3   8 -23   79.39   13.90
   4   8 -23    2.70    7.30
  -4   8 -23   15.80    5.00
   4   8  23   14.70    4.40
   0  -9  23  446.46   37.10
   1  -9  23  180.88   16.80
   1   9  23  210.58   18.00
  -1  -9  23  187.98   16.90
   2  -9  23   24.20    4.00
  -2   9 -23   33.00   11.60
  -2  -9  23   25.50    4.20
   2   9  23   30.00    5.70
   2  -9 -23    9.50    7.90
   3   9 -23   52.39   10.70
   3  -9 -23   36.70   10.20
  -3   9 -23   70.59   11.30
   3   9  23   58.29    8.10
   0 -10 -23    0.10    7.10
   1 -10  23    5.80    2.60
  -1 -10  23    6.20    2.60
   1 -10 -23    5.40    6.60
   2 -10  23   12.90    3.10
   2 -10 -23    7.80    7.30
  -2  10 -23   19.90    8.90
   2  10  23   11.40    3.80
   0 -11 -23   19.90    8.20
   0 -11  23   30.20    4.40
   1 -11  23    4.40    2.40
  -1 -11  23    5.30    3.10
   1 -11 -23    1.10    6.20
   0   0 -24   43.70    9.20
   0   0 -24   38.50   11.10
   0   0  24   25.70    3.60
   1   0 -24  336.07   32.60
  -1   0 -24  291.47   28.60
   1   0  24  286.57   24.70
   2   0 -24   39.80   12.60
  -2   0  24   48.20    6.00
  -2   0 -24   32.80    9.00
  -3   0 -24  259.57   28.80
   3   0 -24  228.38   27.80
  -3   0 -24  201.18   22.90
  -3   0  24  232.68   19.80
  -4   0 -24   19.70   13.90
  -4   0 -24   32.50   10.50
   4   0 -24   23.90   11.60
  -5   0 -24    0.50   11.60
  -5   0 -24    2.20    6.20
   5   0 -24    0.90   10.00
  -5   0  24    7.70    4.90
   0  -1  24   33.80    5.90
   0  -1 -24    3.50    6.60
   0   1 -24   12.20    9.40
   0   1 -24   17.00    7.50
   0  -1  24   11.00    2.50
   0   1  24   16.60    2.80
   0   1  24   37.60    6.70
   0  -1 -24   15.40    9.60
   1   1 -24   82.69   15.70
  -1  -1 -24   72.59   12.10
   1   1  24   88.99    8.50
  -1   1 -24   60.19   11.40
   1  -1 -24   69.09   14.50
  -2   1  24   57.99    6.70
   2   1 -24   55.19   14.50
  -2  -1 -24   54.29   10.40
  -2  -1  24   52.99    6.70
  -2   1 -24   54.59   10.20
   2  -1 -24   68.59   14.80
  -3   1  24   48.70    5.70
   3   1 -24   60.19   14.40
  -3  -1 -24   49.60   13.50
  -3  -1 -24   38.80    9.00
  -3   1 -24   32.30    8.40
  -3   1 -24   49.40   13.20
  -3  -1  24   44.10    5.80
   3  -1 -24   31.50   12.20
   4   1 -24   33.60   12.50
  -4  -1 -24   62.79   17.00
  -4  -1 -24   59.79   13.40
  -4   1 -24   57.09   18.50
  -4   1 -24   45.00   12.40
   4  -1 -24   54.19   13.50
   5   1 -24   19.90   11.00
  -5  -1 -24   27.80   14.10
  -5  -1 -24   27.20    8.50
  -5   1 -24   31.30   14.90
   5  -1 -24   34.00   11.90
  -5   1 -24   35.00    8.10
   0   2 -24   77.89   14.60
   0   2 -24   81.39   12.40
   0  -2 -24   71.69   14.20
   1  -2  24  305.37   28.20
  -1   2  24  345.77   28.20
  -1  -2  24  312.37   27.60
   1   2  24  301.77   29.00
  -2  -2 -24  103.89   14.50
  -2   2  24  119.29   10.80
   2   2 -24  136.09   19.80
  -2  -2  24   97.89   10.90
  -2   2 -24  116.39   15.20
   2  -2 -24  134.89   19.70
   3   2 -24  128.99   20.20
  -3  -2 -24  131.09   16.10
  -3   2  24  119.79   11.00
  -3   2 -24  124.29   15.20
  -3  -2  24  108.09   11.30
   3  -2 -24  110.99   18.30
  -3   2 -24  130.79   20.80
  -4  -2 -24    1.50    8.20
   4   2 -24    4.00   10.60
  -4   2 -24   11.20   13.80
  -4   2 -24    9.70    8.60
   4  -2 -24   10.60    9.90
   5   2 -24    7.10    9.40
  -5  -2 -24   -4.90   10.40
  -5   2  24    3.60    4.70
  -5  -2 -24    8.50    6.60
  -5   2 -24    2.50    4.90
  -5   2 -24    0.80   12.10
  -5  -2  24    8.10    4.80
   0   3  24   21.70    5.90
   0   3 -24    5.20    6.70
   0   3 -24   13.20   10.40
   0  -3  24   17.00    4.40
   0  -3 -24    5.80    8.60
   1   3 -24  318.47   32.40
  -1  -3 -24  244.38   28.10
  -1  -3 -24  254.57   29.00
  -1   3  24  305.97   24.60
  -1   3 -24  287.87   28.10
   1  -3 -24  316.27   31.10
  -2  -3 -24  138.79   19.70
  -2   3  24  201.88   15.90
   2   3 -24  161.78   25.00
   2  -3 -24  180.28   23.30
  -2   3 -24  163.78   19.50
   3   3 -24   92.69   16.90
  -3   3  24   83.29    8.10
  -3  -3 -24   71.59   12.10
  -3   3 -24   76.09   11.60
  -3   3 -24   83.99   16.40
   3  -3 -24   86.69   15.40
  -3  -3  24   72.89    8.60
  -4  -3 -24  185.68   24.10
   4   3 -24  211.58   26.10
  -4   3 -24  229.58   24.80
  -4   3 -24  239.98   32.70
   4  -3 -24  165.98   24.30
  -5  -3 -24   17.00   10.60
  -5  -3 -24   12.00    7.30
   5   3 -24    5.00    8.90
  -5   3  24   22.00    6.00
  -5   3 -24   10.90   13.00
   0  -4  24    3.70    3.10
   0  -4 -24    2.60    8.30
   0   4  24    1.60    4.10
   0   4 -24    3.00    6.30
  -1  -4 -24   40.80   10.70
  -1  -4 -24   21.70    9.40
  -1   4  24   26.80    4.50
   1   4 -24   40.40   12.60
   1  -4 -24   29.90   11.00
  -1   4 -24   32.90    8.50
  -2   4  24  168.18   14.50
  -2  -4 -24  129.89   18.80
   2   4 -24  170.48   24.00
   2  -4 -24  155.28   21.60
  -2   4 -24  169.18   18.30
   3   4 -24  165.68   23.40
  -3   4 -24  148.59   22.40
   3  -4 -24  141.19   20.60
  -4  -4 -24   30.70   10.40
   4   4 -24   24.90   11.40
   4  -4 -24   33.40   11.50
  -4   4 -24   39.40   10.40
   4   4  24   54.99    8.40
   0   5 -24   13.40    7.80
   0  -5  24   32.30    5.20
   0  -5 -24   22.90   10.10
   0   5  24   35.80    6.70
  -1  -5 -24   76.69   13.20
   1   5 -24   83.09   15.90
  -1   5  24   93.49    8.60
  -1  -5 -24   48.00   11.90
  -1   5 -24   73.59   12.20
   1  -5 -24   69.99   14.20
  -2   5  24   19.00    3.90
   2  -5  24   31.50    5.20
   2   5 -24   15.70   11.90
  -2  -5 -24   15.30    8.50
   2   5  24   31.20    7.40
   2  -5 -24   22.00   10.00
  -2   5 -24   17.80   14.00
  -2  -5  24   26.90    4.30
  -2   5 -24   11.00    6.70
   3   5 -24   21.50   12.10
   3  -5 -24   24.60   10.60
  -3   5 -24   24.80   11.20
   3   5  24   45.30    8.30
  -4  -5 -24   96.79   16.00
   4   5 -24   88.79   16.40
   4  -5 -24  103.59   16.60
  -4   5 -24  119.29   16.10
   5   5 -24   50.19   11.00
  -5  -5 -24   47.20    9.50
   0   6  24  141.99   13.30
   0  -6 -24   82.29   16.20
   0  -6  24  128.39   11.80
   0   6 -24   86.59   15.00
  -1  -6 -24   49.90   11.50
   1   6 -24   56.59   13.80
   1  -6  24   78.89    7.90
  -1   6  24   47.80    7.10
   1  -6 -24   48.50   12.30
   1   6  24   80.89   10.30
  -1  -6  24   68.59    7.50
  -1   6 -24   44.50   10.10
   2   6 -24    5.30   11.10
   2  -6  24    9.80    3.50
  -2   6 -24    8.80   10.40
   2  -6 -24   -3.10    8.10
  -2  -6  24   12.40    3.30
   2   6  24   11.80    5.60
   3   6 -24   16.90   11.10
   3  -6 -24   24.60    9.90
   3   6  24   38.80    7.50
  -3   6 -24   29.60   11.30
   4   6 -24   13.70    9.50
   4   6  24    9.30    4.70
   4  -6 -24    3.10    8.70
  -4   6 -24   13.10    7.10
   0  -7 -24   38.60   11.50
   0  -7  24   62.89    7.40
   0   7  24   75.89    8.70
   1  -7  24  590.84   50.19
  -1  -7  24  570.54   49.99
   1   7  24  678.33   51.69
   2  -7  24   43.00    5.80
   2   7 -24   35.70   11.70
   2  -7 -24   29.00   10.40
  -2   7 -24   29.90   14.60
  -2  -7  24   46.70    5.90
   2   7  24   51.79    8.30
   3   7 -24   -1.30    8.70
  -3   7 -24   10.50    9.10
   3   7  24   14.90    5.10
   3  -7 -24    4.80    7.80
   4   7 -24   27.30    9.40
   4   7  24   44.60    6.60
  -4   7 -24   40.70    7.90
   4  -7 -24   30.10    9.70
   0  -8 -24   27.70   10.00
   0  -8  24   44.00    5.70
   1  -8  24   38.60    5.60
  -1  -8  24   43.70    5.80
   1   8  24   51.29    7.20
   1  -8 -24   22.80    9.80
   2   8 -24   13.00    9.60
   2  -8  24   24.00    4.10
  -2  -8  24   25.60    4.10
  -2   8 -24   31.90   12.00
   2  -8 -24   15.20    8.50
   2   8  24   25.20    5.80
   3   8 -24   40.20   12.00
   3   8  24   88.79    9.60
   3  -8 -24   53.59   11.50
  -3   8 -24   75.69   13.00
   0  -9 -24   13.50    8.20
   0  -9  24   22.10    3.90
   1  -9  24   45.40    5.60
   1   9  24   51.99    6.90
  -1  -9  24   43.50    5.70
   1  -9 -24   20.90    9.40
   2  -9  24  129.29   12.10
   2   9  24  137.79   13.30
  -2   9 -24  133.69   20.00
  -3   9 -24   33.00    8.30
   3   9  24   31.80    5.30
   3  -9 -24   14.60    8.00
   0 -10  24  258.77   22.00
   1 -10  24   62.09    6.50
   1 -10 -24   38.80    9.50
  -1 -10  24   58.79    6.40
   2 -10 -24   31.70    8.40
   0   0  25    4.00    3.90
   0   0 -25    3.00    6.50
   0   0 -25   -9.20    8.60
  -1   0 -25    2.60    6.70
   1   0 -25    5.10    9.60
   1   0  25   -0.30    4.20
  -1   0  25    0.00    3.20
   2   0  25   40.90    7.30
  -2   0  25   18.30    4.00
  -2   0 -25    9.20    7.30
  -2   0  25   32.70    6.50
   2   0 -25   17.90   10.90
   3   0 -25   13.60   11.10
   3   0  25   48.20    8.00
  -3   0  25   19.20    3.70
  -3   0 -25   25.30   11.30
  -3   0 -25   15.60    7.20
   4   0 -25    3.20    9.70
  -4   0 -25    1.60    8.30
   5   0 -25   14.10   10.10
  -5   0 -25   14.40   12.90
  -5   0 -25   22.20    7.30
   0   1 -25  131.49   17.10
   0  -1 -25  133.29   19.60
   0  -1 -25   98.09   16.00
   0   1 -25  149.19   19.70
  -1  -1 -25    4.10    7.10
   1   1 -25   20.40   11.20
   1  -1  25   22.70    5.70
  -1   1  25   24.00    5.50
   1  -1 -25   10.60    9.90
   1   1  25   19.40    6.00
  -1   1 -25   19.10    7.50
  -1  -1  25   17.70    4.80
  -2  -1 -25  140.59   18.00
   2   1 -25  156.18   22.30
  -2   1  25  146.99   13.30
   2  -1 -25  162.68   22.10
  -2   1 -25  148.99   18.10
  -2  -1  25  135.99   13.30
  -3   1  25   31.00    4.40
   3   1 -25   52.19   13.50
  -3  -1 -25   27.00   12.00
  -3  -1 -25   18.80    7.70
   3  -1 -25   26.80   11.40
  -3   1 -25   24.60    7.60
  -3   1 -25   23.20   11.70
  -3  -1  25   28.20    4.30
   4   1 -25   65.89   14.50
  -4  -1 -25   76.09   14.50
  -4   1 -25   72.79   13.80
   4  -1 -25   58.19   14.30
   5   1 -25    1.20    9.20
  -5  -1 -25   10.70   12.10
  -5  -1 -25   12.00    7.00
  -5  -1  25   29.30    6.20
  -5   1 -25   11.20    6.00
  -5   1 -25    4.30   12.20
   5  -1 -25    6.10    9.30
   0   2 -25   63.49   13.70
   0  -2 -25   59.49   13.60
   0   2 -25   62.29   10.70
   1  -2  25  541.65   46.60
  -1   2  25  560.44   46.30
  -1  -2  25  527.45   45.90
   1   2  25  567.04   47.40
   2   2 -25  334.57   36.30
  -2  -2 -25  298.17   31.70
  -2   2  25  368.26   28.50
  -2  -2  25  326.37   30.70
  -2   2 -25  341.17   31.80
   2  -2 -25  341.27   35.20
   3   2 -25   11.70   11.00
  -3  -2 -25   10.90    8.20
  -3   2  25   17.40    4.50
  -3   2 -25   10.20    9.90
   3  -2 -25   12.60   10.20
   3   2  25   34.50    7.30
  -3   2 -25   19.70    9.80
   4   2 -25   82.09   15.40
  -4  -2 -25  112.49   30.40
  -4  -2 -25   71.49   14.30
   4  -2 -25   61.29   14.30
  -4   2 -25   78.99   14.30
   5   2 -25    2.10    8.40
  -5   2  25   13.50    5.00
  -5  -2 -25    4.90    6.60
  -5   2 -25    1.90    4.50
   5  -2 -25   -1.10    9.40
  -5  -2  25   10.40    6.10
   0   3 -25   90.39   14.30
   0   3 -25  118.49   16.90
   0  -3 -25  112.29   16.60
   1   3 -25  423.66   39.90
  -1  -3 -25  364.56   37.50
  -1  -3 -25  333.67   36.30
  -1   3 -25  419.66   36.40
   1  -3 -25  445.56   39.30
  -2   3  25   12.60    3.30
   2   3 -25    3.30   10.50
  -2  -3 -25    6.40    7.20
   2  -3  25   23.10    5.30
   2   3  25   25.60    7.10
   2  -3 -25   22.00   10.00
  -2  -3  25   21.10    3.90
  -2   3 -25   19.60    7.60
   3   3 -25   62.79   14.70
   3  -3 -25   56.69   13.80
  -3   3 -25   72.69   15.40
   4   3 -25   62.19   13.90
  -4  -3 -25   48.60   12.40
   4  -3 -25   47.90   12.50
[truncated: 23,823 more chars]
